# Supplementary material
Source: PubMed Central journal article supplement (PMC4499455)
Supplement: NIHMS702249-supplement-Supp_MaterialS1.pdf [file NIHMS702249-supplement-Supp_MaterialS1.pdf]

# **Proteomics-level analysis of myelin formation and regeneration in a mouse model for Vanishing White Matter disease**

Irit Gat-Viks<sup>1\*</sup>, Tamar Geiger<sup>2</sup>, Mali Barbi<sup>1</sup>, Gali Raini<sup>1</sup>, Orna Elroy-Stein<sup>1,3\*</sup>

## **Supplementary Material:**

### **Supplementary Figures**

- Supplementary Figures 1-3 Legends (p. 30)
- Supplementary Figures 1-3 (p. 31 - 33)

### **Supplementary Tables**

- Supplementary Tables 1-5 Legends (p. 34)
- Supplementary Tables 1 (p. 35 - 74)
- Supplementary Tables 2 (p. 75 - 92)
- Supplementary Tables 3 (p. 93 - 108)
- Supplementary Tables 4 (p. 109 - 111)
- Supplementary Tables 5 (p. 112)

## Supplementary Figures

*Supp. Fig. 1. Consistency between the proteome profiles at 11 and 12 weeks of age in normal-diet-fed mice. **Top:** a Van-diagram representation of the overlap between the 100 proteins whose absolute WT-subtracted Eif2b<sup>M</sup> value is higher than 0.5 at 11 weeks of age (orange) and the 75 proteins whose absolute WT-subtracted Eif2b<sup>M</sup> value is higher than 0.5 at 12 weeks of age (purple) (w11/w12 overlap  $P$  value  $< 1.5 \cdot 10^{-22}$ ; hyper-geometric test; see **Methods**). The unified set of all 139 proteins in the two circles are referred to as 'Eif2b-related proteins'. **Bottom:** A scatter plot of the hyper-geometric  $P$ -value (y axis) for different WT-subtracted Eif2b<sup>M</sup> value cutoffs (x axis). The calculation of the overlap  $P$ -value for the case of 0.5 cutoff is illustrated in **a**. For all cutoffs,  $P$ -values are smaller (more significant) than  $10^{-9}$ .*

*Supp. Fig. 2. Correlation matrices of protein responses between different diets and genotypes. Two matrices depicting the Pearson correlations between each two response profiles (that is, developmental myelination or remyelination response, either in WT or in Eif2b<sup>M</sup>) that were calculated across all 1831 measured proteins (**a**) or across a subset of proteins with at least one absolute response value that is higher than 0.4 (**b**). In both cases, the correlations indicate a high resemblance between 'developmental myelination response' in the mutant strain and 'remyelination response' in WT.*

*Supp. Fig. 3: **(a)** Glycolysis and gluconeogenesis. The matrix presents all proteins related to glycolysis and gluconeogenesis (rows) across experiments (columns, shown as detailed in **Fig. 4**). **(b)** Non-ETC proteins. The matrix presents proteins that are in the inner mitochondrial membrane but are not part of the ETC (rows) across experiments (columns, shown as detailed in **Fig. 4**).*

# SFigure 1

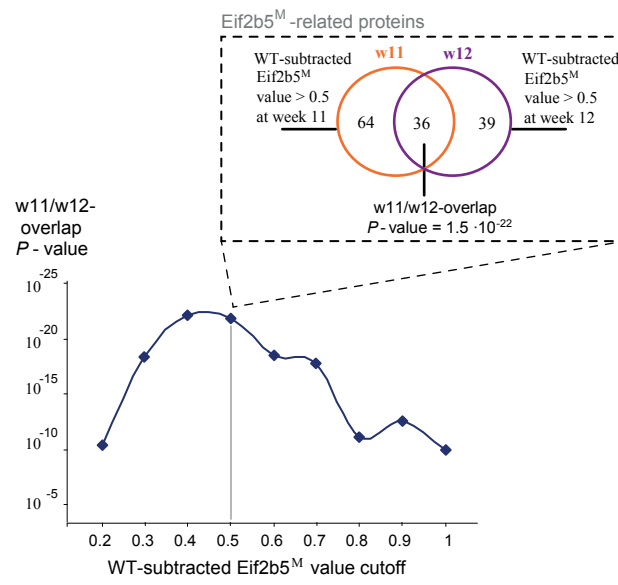

# SFigure 2

**a**

|               |                     | Remyel Resp         |             | Dev Myel Resp       |    |
|---------------|---------------------|---------------------|-------------|---------------------|----|
|               |                     | Eif2b5 <sup>M</sup> | WT          | Eif2b5 <sup>M</sup> | WT |
| Remyel Resp   | Eif2b5 <sup>M</sup> | 1                   |             |                     |    |
|               | WT                  | 0.06                | 1           |                     |    |
| Dev Myel Resp | Eif2b5 <sup>M</sup> | 0.11                | <b>0.59</b> | 1                   |    |
|               | WT                  | -0.32               | -0.38       | -0.38               | 1  |

**b**

|               |                     | Remyel Resp         |             | Dev Myel Resp       |    |
|---------------|---------------------|---------------------|-------------|---------------------|----|
|               |                     | Eif2b5 <sup>M</sup> | WT          | Eif2b5 <sup>M</sup> | WT |
| Remyel Resp   | Eif2b5 <sup>M</sup> | 1                   |             |                     |    |
|               | WT                  | 0.19                | 1           |                     |    |
| Dev Myel Resp | Eif2b5 <sup>M</sup> | 0.39                | <b>0.54</b> | 1                   |    |
|               | WT                  | -0.45               | -0.36       | -0.29               | 1  |

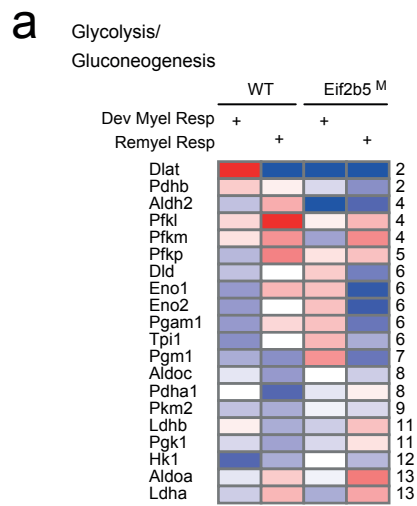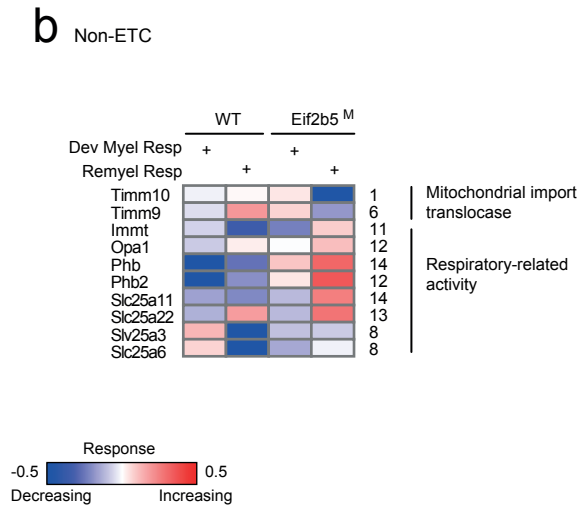

## Supplementary Tables

*Supplementary Table 1. Protein levels in all eight experiments.* The experiment depicted only highly abundant proteins. For all 1831 measured proteins, shown are UniProt ID (column 1), entrez ID in mouse (column 2), symbol name (column 3) and protein levels (H/L ratio) in all eight experiments (columns 4-11).

*Supplementary Table 2. Developmental myelination and remyelination responses.* Shown are 802 proteins for which response data is available (column 1), their cluster identifier (column 2) and responses during developmental myelination in WT (column 3) and eIF2B5<sup>R132H/R132H</sup> mutant (column 5) as well as remyelination responses in WT (column 4) and mutant (column 6). Response values are presented as fold changes (w12/w11 ratio). Note that only highly abundant proteins are shown.

*Supplementary Table 3. Functional enrichments in all protein that were measured under normal diet.* For four experiments (Mut in week 11, WT in week 11, Mut in week 12 and WT in week 12, in columns 1-4, respectively), presented are functional categories (left) and their enrichment hyper-geometric P values (right) for all 1831 measured proteins. The functional categories are sorted based on the P-values in each column separately. P-values were calculated and corrected for multiple testing by the IPA software.

*Supplementary Table 4. eIF2B-related proteins.* Shown are the 139 eIF2B-related proteins (column 1), the cluster for each protein (column 2) and their protein levels (H/L ratio) in WT (week 11 and 12 in columns 3 and 4, respectively) and mutant Eif2b5<sup>R132H/R132H</sup> mice (week 11 and 12 in columns 5 and 6, respectively).

*Supplementary Table 5. Functional enrichments of the eIF2B-related proteins.* Shown are broad and specific functional categories (columns 1 and 2) and the P-value of statistical significance (column 3). The number of eIF2B-related proteins and the particular symbols in each category are specified in columns 4 and 5, respectively.

Supp. Table 1

| Uniprot identifier | Entrez identifier | Symbol        | Developmental Myelination |         |        |        | Remyelination |         |        |        |
|--------------------|-------------------|---------------|---------------------------|---------|--------|--------|---------------|---------|--------|--------|
|                    |                   |               | Mut-w11                   | Mut-w12 | WT-w11 | WT-w12 | Mut-w11       | Mut-w12 | WT-w11 | WT-w12 |
| P56379             | 70257             | 2010107E04Rik |                           | 0.99    | 0.99   | 0.97   | 0.95          | 1.03    | 1.22   | 0.96   |
| Q3UJH0             | 269774            | Aak1          | 3.65                      | 1.14    | 1.18   | 3.46   | 2.46          | 1.04    | 2.83   | 1.07   |
| Q8BGQ7             | 234734            | Aars          | 1.00                      | 1.02    | 0.89   | 0.94   | 0.83          | 0.99    | 0.90   | 0.95   |
| P61922             | 268860            | Abat          | 0.85                      | 0.99    | 0.81   | 0.96   | 1.22          | 1.02    | 1.18   | 0.99   |
| P61222             | 24015             | Abce1         |                           | 1.12    | 0.99   |        | 0.98          | 1.00    |        | 0.98   |
| Q99LR1             | 76192             | Abhd12        |                           | 1.04    | 1.13   | 1.25   | 1.02          | 1.08    | 1.22   | 1.08   |
| Q8R2Y0             | 66082             | Abhd6         |                           | 1.51    | 1.19   | 1.71   | 1.04          | 1.22    | 2.15   | 0.99   |
| Q8CBW3             | 11308             | Abi1          | 1.45                      |         | 1.08   |        |               | 0.97    |        | 1.29   |
| P62484             | 329165            | Abi2          | 1.16                      | 1.13    | 1.15   |        | 0.97          | 0.98    |        | 1.11   |
| Q5SSL4             | 109934            | Abr           | 1.21                      | 1.08    | 1.11   | 1.32   | 0.87          | 1.21    | 1.22   | 1.21   |
| Q5SWU9             | 107476            | Acaca         |                           |         | 1.34   |        |               |         |        |        |
| Q8JZN5             | 229211            | Acad9         |                           | 1.11    |        |        |               |         |        |        |
| P51174             | 11363             | Acadl         |                           | 1.08    | 0.86   |        |               | 0.87    |        | 0.92   |
| P50544             | 11370             | Acadvl        | 0.82                      | 0.93    | 0.89   | 0.93   | 0.90          | 0.96    | 1.01   | 0.97   |
| Q8QZT1             | 110446            | Acat1         | 1.01                      | 1.09    | 0.97   | 1.05   | 0.98          | 0.98    | 0.99   | 0.93   |
| Q91V92             | 104112            | Acly          | 0.96                      | 0.91    | 0.90   | 0.95   | 0.85          | 0.91    | 0.99   | 0.93   |
| P28271             | 11428             | Aco1          |                           | 1.11    | 0.84   | 0.79   | 0.81          | 1.14    | 0.72   | 0.96   |
| Q99K10             | 11429             | Aco2          | 0.93                      | 1.01    | 0.97   | 0.92   | 0.95          | 0.97    | 0.92   | 0.98   |
| Q9CQR4             | 66834             | Acot13        | 1.08                      | 1.03    | 0.82   | 0.99   | 0.97          | 0.96    | 0.97   | 0.94   |
| Q91V12             | 70025             | Acot7         | 0.95                      | 0.92    | 0.92   | 0.98   | 1.14          | 1.01    | 1.23   | 0.92   |
| Q9R0X4             | 64833 563         | Acot9         | 2.48                      | 1.04    | 1.41   |        |               | 0.99    |        | 1.04   |
| Q99PU5             | 94180             | Acsbg1        | 0.93                      | 0.91    | 0.95   | 1.11   | 1.53          | 1.12    |        | 0.85   |
| Q8VCW8             | 264895            | Acsf2         | 0.97                      | 0.93    |        | 1.09   | 0.65          | 0.91    | 1.07   | 1.08   |
| P41216             | 14081             | Acs1          |                           |         |        |        |               | 1.23    |        |        |
| Q9CZW4             | 74205             | Acs13         | 0.70                      |         |        |        | 0.65          |         |        |        |
| Q91WC3             | 216739            | Acs16         | 0.90                      | 1.00    | 0.88   | 1.13   | 0.85          | 1.00    | 1.06   | 0.95   |
| Q8BFZ3             | 238880            | Actb12        |                           | 0.96    | 0.91   | 0.71   |               | 0.72    | 0.26   | 0.99   |
| P68033             | 11464             | Actc1         | 0.93                      | 0.99    | 0.98   | 0.98   | 1.02          | 0.96    | 0.94   | 1.03   |
| Q7TPR4             | 109711            | Actn1         | 0.63                      | 0.89    | 1.04   | 0.83   | 1.14          | 0.89    | 0.99   | 1.22   |
| P57780             | 60595             | Actn4         | 0.70                      | 0.94    | 1.10   | 0.90   | 1.27          | 0.86    | 1.06   | 1.25   |
| P61164             | 54130             | Actr1a        | 1.02                      |         |        | 0.95   | 1.03          |         | 1.08   |        |
| Q8R5C5             | 226977            | Actr1b        | 1.06                      | 0.97    | 1.10   | 1.04   | 0.98          | 0.99    | 0.96   | 1.04   |
| P61161             | 66713             | Actr2         | 1.38                      | 0.90    | 1.15   | 1.16   | 0.98          | 1.15    | 1.22   | 1.10   |
| Q99JY9             | 74117             | Actr3         | 1.41                      | 1.03    | 1.02   | 1.13   | 0.86          | 0.99    | 1.16   | 1.03   |
| Q641P0             | 242894            | Actr3b        | 1.74                      | 1.11    | 1.14   | 1.42   | 1.36          | 1.03    | 1.14   | 1.09   |
| P56376             | 66204             | Acyp1         | 0.95                      | 0.86    | 0.96   | 0.96   | 0.98          | 0.90    | 0.77   | 0.90   |
| P56375             | 75572             | Acyp2         | 0.86                      | 0.94    | 0.91   | 0.82   | 0.86          | 0.88    | 1.08   | 0.85   |
| Q9R1V6             | 11496             | Adam22        | 0.94                      | 0.94    | 0.97   |        | 1.13          | 0.98    | 0.72   | 0.90   |
| Q9R1V7             | 23792             | Adam23        | 0.92                      | 0.82    | 0.98   | 0.95   | 1.10          | 0.94    | 0.97   | 1.00   |
| P51830             | 11515             | Adcy9         |                           | 0.69    |        |        |               | 2.64    |        |        |
| Q9QYC0             | 11518             | Add1          | 1.12                      | 1.03    | 1.10   | 1.10   | 0.97          | 1.05    | 1.09   | 1.06   |
| Q9QYB8             | 11519             | Add2          | 1.80                      | 1.05    | 1.04   | 1.52   | 1.56          | 1.05    | 1.32   | 1.08   |
| Q9QYB5             | 27360             | Add3          | 1.07                      | 1.09    | 1.39   |        | 0.99          | 0.96    | 0.66   |        |
| P28474             | 11532             | Adh5          |                           | 1.01    | 1.41   |        | 1.29          | 0.93    |        | 0.83   |
| P54923             | 11544             | Adprh         |                           | 0.99    | 1.11   |        |               | 0.84    |        | 0.90   |
| Q8CG72             | 100206            | Adprh12       |                           |         | 1.35   |        |               | 1.05    |        | 1.01   |

Supp. Table 1 (cont.)

| Uniprot_ID | Entrez_Gen | Symbol   | Developmental Myelination |         |        |        | Remyelination |         |        |        |
|------------|------------|----------|---------------------------|---------|--------|--------|---------------|---------|--------|--------|
|            |            |          | Mut-w11                   | Mut-w12 | WT-w11 | WT-w12 | Mut-w11       | Mut-w12 | WT-w11 | WT-w12 |
| Q99MK8     | 110355     | Adrbk1   | 1.48                      | 0.96    | 1.04   |        | 1.21          | 0.93    |        | 1.02   |
| Q8JZQ2     | 69597      | Afg3l2   | 1.10                      | 0.94    | 0.94   | 1.02   | 1.00          | 1.04    | 0.97   | 0.93   |
| Q3UHD9     | 216439     | Agap2    | 1.48                      | 1.10    | 1.25   |        | 1.68          | 1.23    |        | 1.12   |
| Q9ESW4     | 69923      | Agk      |                           | 1.16    | 1.02   |        | 1.18          | 1.05    |        | 1.09   |
| P50247     | 269378     | Ahcy     | 0.84                      | 0.91    | 0.87   | 0.90   | 1.21          | 0.88    | 0.92   | 0.91   |
| Q80SW1     | 229709     | Ahcyl1   | 1.00                      | 0.95    | 0.92   | 1.06   | 0.93          | 0.97    | 0.94   | 0.94   |
| Q68FL4     | 74340      | Ahcyl2   |                           |         | 1.32   |        |               |         |        |        |
| Q9Z0X1     | 26926      | Aifm1    | 1.04                      | 0.92    | 0.92   | 1.26   | 0.90          | 1.06    | 1.27   | 0.87   |
| P31230     | 13722      | Aimp1    |                           |         | 2.69   |        | 0.96          | 0.88    | 1.20   |        |
| Q8R010     | 231872     | Aimp2    | 1.37                      |         | 1.08   |        |               | 1.20    | 1.39   | 1.11   |
| Q9R0Y5     | 11636      | Ak1      | 1.03                      | 1.06    | 1.03   | 0.99   | 0.84          | 0.93    | 1.08   | 1.02   |
| Q9WTP7     | 56248      | Ak3      | 1.22                      | 1.06    | 0.97   | 0.97   | 0.67          | 0.97    | 1.32   | 1.05   |
| Q9WUR9     | 11639      | Ak4      | 1.23                      | 1.14    | 1.00   |        | 0.85          | 0.97    | 0.77   | 0.95   |
| Q920P5     | 229949     | Ak5      | 1.12                      | 1.07    | 0.95   |        | 1.11          | 0.96    | 1.04   | 1.11   |
| Q9WTQ5     | 83397      | Akap12   | 3.63                      | 1.12    | 0.84   | 2.48   |               |         | 5.89   | 0.86   |
| O55074     | 432442     | Akap7    | 1.07                      | 0.95    | 0.96   | 0.91   | 0.74          | 0.97    | 1.39   | 0.97   |
| Q70FJ1     | 100986     | Akap9    |                           | 1.30    |        |        |               | 1.10    |        |        |
| Q9JII6     | 58810      | Akr1a1   | 0.90                      | 1.06    | 0.96   | 0.85   |               | 0.95    | 0.93   | 1.03   |
| P45376     | 11677      | Akr1b1   | 0.97                      | 0.95    | 0.98   |        |               | 0.96    | 1.03   | 0.96   |
| P21300     | 11997      | Akr1b7   | 0.88                      | 0.96    | 0.88   |        |               | 0.93    | 0.88   | 0.82   |
| Q8CG76     | 110198     | Akr7a2   |                           | 1.01    | 0.95   |        |               | 0.94    |        | 0.95   |
| Q60823     | 11652      | Akt2     |                           |         | 1.02   |        |               |         |        |        |
| Q61490     | 11658      | Alcam    | 0.97                      | 1.01    | 1.08   | 0.88   | 1.22          | 0.88    | 0.74   | 0.99   |
| Q9Z110     | 56454      | Aldh18a1 |                           | 0.96    | 1.34   |        | 1.07          | 1.21    | 0.92   | 1.02   |
| P24549     | 11668      | Aldh1a1  |                           |         |        |        |               |         | 1.20   |        |
| Q9CZS1     | 72535      | Aldh1b1  | 1.00                      |         | 1.09   | 1.69   | 1.44          |         | 1.20   |        |
| Q8R0Y6     | 107747     | Aldh1l1  | 0.83                      | 1.16    | 0.92   | 0.96   | 1.10          | 1.05    | 0.96   | 1.04   |
| P47738     | 11669      | Aldh2    | 1.56                      | 0.97    | 0.95   | 0.90   | 0.99          | 0.83    | 0.97   | 1.08   |
| Q8CHT0     | 212647     | Aldh4A1  | 0.83                      |         |        |        | 1.21          |         | 0.92   |        |
| Q8BWF0     | 214579     | Aldh5A1  | 0.86                      | 0.93    | 0.81   | 0.82   | 1.00          | 1.01    | 0.95   | 0.88   |
| Q9EQ20     | 104776     | Aldh6A1  |                           | 1.16    | 1.03   |        |               | 0.94    | 1.10   | 1.06   |
| Q9DBF1     | 110695     | Aldh7A1  |                           | 1.03    | 1.40   |        |               | 1.08    |        | 1.40   |
| P05064     | 11674      | Aldoa    | 1.00                      | 1.01    | 0.99   | 0.97   | 0.82          | 0.99    | 0.92   | 1.00   |
| P05063     | 11676      | Aldoc    | 0.84                      | 0.85    | 0.86   | 0.86   | 0.99          | 0.96    | 1.01   | 0.91   |
| Q9DBE8     | 56737      | Alg2     |                           |         | 0.99   | 1.06   |               | 1.06    |        | 0.99   |
| O08583     | 21681      | Alyref   | 1.26                      | 1.20    | 1.14   | 1.03   |               | 1.08    |        | 0.91   |
| Q7TQF7     | 218038     | Amph     | 2.12                      | 1.08    | 1.02   | 2.10   | 2.37          | 0.94    | 1.82   | 1.04   |
| Q02357     | 11733      | Ank1     | 1.09                      | 0.92    | 1.01   | 0.71   |               | 1.25    | 1.35   | 0.99   |
| Q8C8R3     | 109676     | Ank2     | 1.02                      | 1.03    | 1.05   | 1.19   | 1.31          | 1.14    | 1.08   | 1.14   |
| O35381     | 11737      | Anp32a   | 1.04                      | 1.00    | 0.90   | 1.02   | 1.25          | 0.87    | 1.12   | 1.01   |
| P97822     | 66471      | Anp32e   | 1.08                      |         |        |        | 1.38          | 0.84    | 1.15   |        |
| P97449     | 16790      | Anpep    | 1.02                      | 0.84    |        | 0.80   | 1.35          | 1.01    | 0.96   |        |
| P10107     | 16952      | Anxa1    |                           | 0.79    | 0.79   |        |               | 0.75    |        | 0.83   |
| P07356     | 12306      | Anxa2    |                           |         |        |        | 1.39          |         |        |        |
| P48036     | 11747      | Anxa5    | 0.83                      | 0.95    | 0.87   | 0.76   | 1.25          | 0.96    | 0.91   | 0.99   |
| P14824     | 11749      | Anxa6    | 0.92                      | 0.92    | 1.00   | 1.00   | 1.12          | 0.94    | 0.95   | 0.98   |



Supp. Table 1 (cont.)

| Uniprot_ID | Entrez_Gen | Symbol   | Developmental Myelination |         |        |        | Remyelination |         |        |        |
|------------|------------|----------|---------------------------|---------|--------|--------|---------------|---------|--------|--------|
|            |            |          | Mut-w11                   | Mut-w12 | WT-w11 | WT-w12 | Mut-w11       | Mut-w12 | WT-w11 | WT-w12 |
| Q35643     | 11764      | Ap1b1    | 1.54                      | 1.01    | 0.98   | 1.32   | 1.30          | 1.00    | 1.48   | 1.02   |
| P22892     | 11765      | Ap1g1    | 2.02                      |         | 1.05   |        | 1.28          |         | 1.39   | 0.25   |
| P17426     | 11771      | Ap2A1    | 1.42                      | 1.01    | 1.02   | 1.30   | 1.16          | 0.96    | 1.16   | 1.02   |
| P17427     | 11772      | Ap2A2    | 1.08                      | 1.02    | 0.98   | 1.08   | 1.07          | 0.91    | 0.98   | 1.02   |
| Q9DBG3     | 71770      | Ap2b1    | 1.03                      | 1.04    | 1.02   | 1.08   | 0.97          | 0.97    | 0.98   | 1.03   |
| P84091     | 11773      | Ap2M1    | 0.95                      | 1.02    | 1.03   | 1.40   | 1.00          | 0.95    | 1.23   | 1.02   |
| P62743     | 232910     | Ap2S1    | 0.98                      | 1.10    | 1.15   | 1.05   | 0.87          | 1.00    | 0.73   | 0.88   |
| Q9JME5     | 11775      | Ap3b2    | 0.99                      | 1.04    | 0.99   | 1.09   | 1.03          | 1.00    | 1.07   | 1.05   |
| O54774     | 11776      | Ap3d1    | 1.57                      | 1.09    | 1.04   | 1.56   | 1.53          | 1.02    | 1.34   | 1.01   |
| Q8R2R9     | 64933      | Ap3M2    |                           |         | 1.54   | 1.08   |               | 1.34    |        | 1.19   |
| Q8R146     | 235606     | Apeh     |                           |         | 0.76   |        |               |         |        |        |
| P28352     | 11792      | Apex1    | 1.23                      | 1.19    | 1.24   |        | 1.82          | 1.45    | 1.36   | 1.18   |
| Q03157     | 11803      | Aplp1    |                           |         | 1.40   |        |               |         |        | 0.96   |
| Q00623     | 11806      | Apoa1    | 0.86                      |         | 1.23   | 0.51   |               |         |        |        |
| Q8K4Z3     | 246703     | Apoa1bp  | 0.99                      | 1.10    | 0.99   | 1.13   | 0.76          | 1.01    | 1.18   | 1.02   |
| P09813     | 11807      | Apoa2    | 0.50                      |         |        |        |               |         |        |        |
| P08226     | 11816      | Apoe     |                           | 0.82    | 0.84   |        |               | 1.08    | 0.95   | 0.90   |
| Q9DCZ4     | 621156 68  | Apoo     | 1.21                      | 0.98    | 0.94   | 1.25   | 1.14          | 1.07    | 1.17   | 0.97   |
| Q78IK4     | 68117      | Apool    |                           |         |        | 1.04   |               |         |        |        |
| P12023     | 11820      | App      |                           |         |        | 0.95   |               | 3.57    |        | 0.85   |
| Q8K3H0     | 72993      | App1     | 1.84                      | 0.89    | 1.09   |        | 1.85          | 1.08    | 0.90   | 0.97   |
| P55088     | 11829      | Aqp4     | 0.68                      | 0.90    |        | 0.61   |               |         | 0.69   |        |
| Q8BSL7     | 11841      | Arf2     | 1.01                      |         | 0.83   |        |               |         |        | 1.11   |
| P61205     | 11842      | Arf3     | 1.02                      | 0.99    | 1.00   | 1.02   | 0.90          | 1.01    | 1.01   | 1.04   |
| P61750     | 11843      | Arf4     |                           | 1.21    |        |        |               | 0.87    |        |        |
| P84084     | 11844      | Arf5     | 1.00                      | 0.99    | 1.07   | 1.02   | 0.88          | 1.07    | 0.93   | 1.06   |
| P62331     | 11845      | Arf6     | 0.97                      | 0.79    | 1.01   | 1.04   | 0.88          | 0.98    | 1.15   | 0.99   |
| Q5FWK3     | 228359     | Arhgap1  | 1.16                      |         |        | 1.15   | 1.48          |         | 1.32   |        |
| Q91YM2     | 232906     | Arhgap35 |                           |         | 1.56   |        |               | 1.44    |        | 1.19   |
| P97393     | 11855      | Arhgap5  |                           | 0.96    | 0.93   |        |               |         |        |        |
| Q99PT1     | 192662     | Arhgdia  | 1.14                      | 0.97    | 0.94   | 1.07   | 1.60          | 0.96    | 1.17   | 0.99   |
| Q60875     | 16800      | Arhgef2  | 1.11                      | 1.03    | 1.33   | 1.10   | 1.13          | 0.98    | 1.03   | 1.15   |
| P61211     | 104303     | Arl1     | 1.20                      |         | 1.13   |        | 0.82          | 3.48    | 1.05   | 1.08   |
| Q9WUL7     | 56350      | Arl3     | 1.05                      | 0.98    | 1.01   | 1.04   | 1.09          | 0.96    | 1.20   | 0.91   |
| Q88848     | 56297      | Arl6     |                           |         |        |        |               | 0.88    |        | 0.91   |
| Q8VEH3     | 68724      | Arl8A    | 1.00                      | 1.24    | 0.90   | 1.06   | 0.83          | 1.14    |        | 1.10   |
| Q9CQW2     | 67166      | Arl8b    | 0.94                      | 1.00    | 0.92   | 1.04   | 0.90          | 1.11    | 0.98   | 0.97   |
| Q9D0L7     | 67211      | Armc10   | 1.01                      |         |        |        |               | 1.14    |        |        |
| Q8BNU0     | 76813      | Armc6    |                           |         |        |        |               |         | 1.31   |        |
| Q9R0Q6     | 56443      | Arpc1a   | 0.95                      | 1.05    | 1.28   | 1.20   | 0.88          | 1.18    | 0.93   | 1.09   |
| Q9CVB6     | 76709      | Arpc2    | 1.19                      | 1.01    | 1.10   | 1.07   | 0.99          | 1.01    | 0.95   | 1.03   |
| Q9JM76     | 56378      | Arpc3    | 1.15                      | 1.06    | 1.05   | 1.06   | 0.87          | 1.03    | 1.03   | 1.00   |
| P59999     | 68089      | Arpc4    | 1.01                      | 1.01    | 1.03   | 1.06   | 1.08          | 0.99    | 1.02   | 1.04   |
| Q9CPW4     | 67771      | Arpc5    |                           | 1.11    | 0.97   |        | 0.90          | 1.06    | 1.04   | 1.07   |
| Q9D898     | 74192      | Arpc5l   |                           | 0.99    |        |        | 1.01          | 0.98    |        | 1.14   |
| P56212     | 59046      | Arpp19   |                           | 0.92    | 0.99   | 1.80   |               | 1.23    |        | 0.96   |

Supp. Table 1 (cont.)

| Uniprot_ID | Entrez_Gen | Symbol        | Developmental Myelination |         |        |        | Remyelination |         |        |        |
|------------|------------|---------------|---------------------------|---------|--------|--------|---------------|---------|--------|--------|
|            |            |               | Mut-w11                   | Mut-w12 | WT-w11 | WT-w12 | Mut-w11       | Mut-w12 | WT-w11 | WT-w12 |
| Q9WV54     | 11886      | Asah1         | 1.05                      |         | 0.96   |        |               | 1.04    |        | 1.03   |
| Q9QWY8     | 13196      | Asap1         |                           | 0.94    | 1.08   |        |               | 0.97    |        |        |
| O54984     | 56495      | Asna1         | 0.95                      | 1.20    | 1.02   | 1.11   | 2.30          | 0.95    | 1.32   | 1.08   |
| Q8R3P0     | 11484      | Aspa          |                           | 0.78    | 0.68   |        |               | 0.69    |        | 0.58   |
| Q80VP9     | 72898      | Asphd2        |                           |         | 1.15   |        |               | 1.19    |        | 1.07   |
| Q8C0M9     | 66514      | Asrgl1        | 0.99                      | 1.00    | 0.87   | 1.00   | 0.71          | 0.96    | 1.01   | 0.96   |
| P16460     | 11898      | Ass1          | 0.71                      | 1.31    |        |        | 0.84          |         | 1.28   | 0.98   |
| Q61137     | 11899      | Astn1         | 1.08                      |         | 1.13   | 0.98   | 0.88          | 0.87    | 0.92   |        |
| Q925I1     | 108888     | Atad3A/Atad3b |                           | 0.96    | 1.12   |        | 1.10          | 1.49    |        | 1.00   |
| Q9D906     | 74244      | Atg7          | 1.06                      |         | 0.80   |        | 0.94          | 1.20    |        | 1.35   |
| Q9CWJ9     | 108147     | Atic          | 1.00                      | 0.96    | 1.08   | 0.87   | 0.98          | 0.87    |        | 0.92   |
| Q8BH66     | 73991      | Atl1          | 1.39                      | 0.97    | 1.48   | 1.12   | 0.94          | 1.01    | 0.91   | 1.15   |
| Q6PA06     | 56298      | Atl2          |                           |         |        | 1.22   |               | 1.05    |        | 0.94   |
| O08997     | 11927      | Atox1         | 1.04                      | 0.92    |        |        |               | 0.92    | 1.03   |        |
| Q8VDN2     | 11928      | Atp1a1        | 0.91                      | 1.00    | 1.21   | 0.77   | 0.76          | 1.10    | 0.81   | 1.07   |
| Q6PIE5     | 98660      | Atp1a2        | 0.78                      | 0.94    | 0.79   | 0.77   | 0.74          | 0.91    | 0.97   | 0.88   |
| Q6PIC6     | 232975     | Atp1A3        | 0.78                      | 0.90    | 0.87   | 0.67   | 0.70          | 0.90    | 0.94   | 0.92   |
| P14094     | 11931      | Atp1b1        | 0.90                      | 0.98    | 1.01   | 0.83   | 0.89          | 1.01    | 0.98   | 0.98   |
| P14231     | 11932      | Atp1b2        | 1.06                      | 0.89    | 0.78   | 0.95   | 0.97          | 0.89    | 1.00   | 0.85   |
| O55143     | 11938      | Atp2a2        | 1.08                      | 1.04    | 1.07   | 0.89   | 0.81          | 1.14    | 0.87   | 1.14   |
| Q9R0K7     | 11941      | Atp2b2        | 1.08                      | 1.00    | 1.10   | 1.09   | 0.96          | 1.07    | 0.98   | 1.02   |
| Q03265     | 11946      | Atp5a1        | 1.01                      | 0.99    | 1.01   | 1.01   | 0.92          | 0.95    | 1.13   | 0.98   |
| P56480     | 11947      | Atp5b         | 0.94                      | 0.97    | 1.02   | 0.93   | 1.19          | 1.03    | 1.03   | 1.00   |
| Q91VR2     | 11949      | Atp5c1        | 1.11                      | 1.02    | 1.01   | 1.02   | 0.97          | 1.08    | 1.15   | 0.98   |
| Q9D3D9     | 66043      | Atp5d         |                           | 1.12    | 0.96   | 0.99   | 1.00          | 1.07    |        | 1.30   |
| P56382     | 67126      | Atp5e         | 1.11                      | 0.90    | 0.94   | 0.96   | 1.05          | 0.95    | 1.11   | 0.96   |
| Q9CQQ7     | 11950      | Atp5f1        | 1.13                      | 1.04    | 1.02   | 0.99   | 1.00          | 1.10    | 1.07   | 0.98   |
| Q9DCX2     | 71679      | Atp5h         | 1.00                      | 1.01    | 1.01   | 0.94   | 1.02          | 1.03    | 1.11   | 0.98   |
| Q06185     | 11958      | Atp5l         | 0.94                      | 1.04    | 0.99   | 0.92   | 1.03          | 0.99    | 0.97   | 1.00   |
| P97450     | 11957      | Atp5J         | 0.98                      | 1.00    | 1.02   | 0.92   | 1.14          | 0.99    | 1.02   | 0.92   |
| P56135     | 57423      | Atp5j2        | 0.84                      | 0.92    | 0.96   | 0.94   | 0.71          | 0.94    | 1.02   | 0.95   |
| Q9CPQ8     | 27425      | Atp5l         | 1.03                      | 0.98    | 0.96   | 0.99   | 0.93          | 1.00    | 0.99   | 0.93   |
| Q9DB20     | 28080      | Atp5o         | 1.00                      | 0.99    | 0.97   | 0.92   | 0.89          | 1.02    | 1.04   | 0.97   |
| Q9CRA7     | 68055      | Atp5s         | 1.00                      | 1.12    | 1.01   |        | 0.86          | 0.93    | 0.95   | 0.83   |
| Q9CYN9     | 70495      | Atp6Ap2       |                           | 0.90    | 0.98   | 0.68   | 1.06          | 0.95    | 1.11   | 0.98   |
| Q9Z1G4     | 11975      | Atp6v0a1      | 0.97                      | 0.94    | 1.07   | 0.68   | 0.83          | 1.01    | 1.06   | 1.01   |
| P63082     | 100039636  | Atp6v0c       | 0.93                      | 1.02    | 1.08   | 0.73   | 0.78          | 1.10    | 1.04   | 1.04   |
| P51863     | 11972      | Atp6v0d1      | 0.96                      | 0.97    | 1.11   | 1.02   | 0.82          | 1.06    | 1.00   | 1.03   |
| P50516     | 11964      | Atp6v1a       | 0.94                      | 0.98    | 0.98   | 0.93   | 0.99          | 0.97    | 0.89   | 1.00   |
| P62814     | 11966      | Atp6v1b2      | 1.01                      | 1.07    | 1.06   | 0.90   | 0.95          | 1.05    | 0.96   | 1.08   |
| Q9Z1G3     | 66335      | Atp6v1c1      | 1.03                      | 0.96    | 1.02   | 0.97   | 0.97          | 0.98    | 1.01   | 0.99   |
| P57746     | 73834      | Atp6v1d       | 1.00                      | 1.00    | 1.04   | 0.94   | 1.10          | 0.95    | 1.07   | 1.07   |
| P50518     | 11973      | Atp6v1e1      | 1.05                      | 0.97    | 1.00   | 0.93   | 0.98          | 0.97    | 1.11   | 1.00   |
| Q9D1K2     | 66144      | Atp6v1f       | 1.11                      | 1.03    | 1.04   | 1.13   | 0.88          | 1.00    | 1.06   | 0.95   |
| Q9CR51     | 66290      | Atp6v1g1      | 1.19                      | 1.28    | 1.08   | 1.13   | 1.03          | 0.89    | 1.43   | 1.12   |
| Q9WTT4     | 66237      | Atp6v1g2      | 0.95                      | 0.99    | 1.01   | 1.00   | 0.95          | 0.98    | 0.97   | 1.06   |

Supp. Table 1 (cont.)

| Uniprot ID | Entrez Gene | Symbol       | Developmental Myelination |         |        |        | Remyelination |         |        |        |
|------------|-------------|--------------|---------------------------|---------|--------|--------|---------------|---------|--------|--------|
|            |             |              | Mut-w11                   | Mut-w12 | WT-w11 | WT-w12 | Mut-w11       | Mut-w12 | WT-w11 | WT-w12 |
| Q8BVE3     | 108664      | Atp6v1h      | 1.21                      | 0.97    | 1.10   | 1.13   | 1.06          | 1.09    | 1.05   | 1.14   |
| P03930     | 17706       | Atp8         | 1.04                      | 1.00    | 1.02   | 1.19   | 0.94          | 0.94    | 1.04   | 0.96   |
| O35143     | 11983       | Atpif1       | 0.97                      | 0.98    | 0.97   | 0.97   | 1.26          | 0.95    | 0.95   | 0.96   |
| Q9JLZ3     | 11992       | Auh          | 0.97                      | 1.06    | 0.57   | 0.90   | 0.85          | 0.98    | 1.03   | 0.88   |
| Q8BKX1     | 108100      | Baiap2       | 1.46                      | 1.29    | 1.00   | 1.47   | 1.73          | 1.52    | 1.15   | 1.31   |
| Q91XV3     | 70350       | Basp1        | 1.06                      | 1.01    | 1.11   | 1.83   | 1.52          | 1.00    | 0.85   | 1.08   |
| Q61361     | 12032       | Bcan         | 0.97                      | 0.90    | 0.89   | 0.91   |               | 0.86    | 0.93   | 0.97   |
| Q61335     | 27061       | Bcap31       |                           | 0.89    | 1.10   | 0.58   |               | 1.20    |        | 0.99   |
| Q80YN3     | 76960       | Bcas1        | 1.26                      | 0.92    | 0.96   |        |               | 1.09    | 0.89   | 0.76   |
| Q8CCN5     | 192197      | Bcas3        |                           |         |        |        | 1.24          |         |        |        |
| P24288     | 12035       | Bcat1        |                           |         |        |        | 0.20          | 1.26    |        |        |
| Q6P3A8     | 12040       | Bckdhb       |                           |         |        | 1.25   |               |         | 1.44   |        |
| P59017     | 94044       | Bcl2l13      |                           |         |        |        |               |         |        | 1.42   |
| Q80XN0     | 71911       | Bdh1         | 1.03                      | 1.12    | 1.09   | 1.14   |               | 1.02    | 0.92   | 1.03   |
| O08539     | 30948       | Bin1         | 4.14                      | 1.04    | 1.04   | 3.44   | 4.23          | 1.01    | 1.62   | 1.02   |
| Q8R016     | 104184      | Blmh         |                           | 1.02    | 1.03   |        |               | 1.07    |        |        |
| Q9CY64     | 109778      | Blvra        |                           | 1.10    | 1.12   |        |               | 0.95    |        | 0.93   |
| Q8BGS2     | 66162       | Bola2/Bola2B |                           | 1.03    | 0.94   |        |               |         | 1.36   |        |
| Q8R164     | 68021       | Bphl         | 1.05                      | 1.05    | 1.01   | 0.91   | 1.03          | 1.02    | 1.38   | 1.24   |
| Q9Z0S1     | 23827       | Bpnt1        | 1.01                      | 1.01    | 0.89   | 1.16   | 1.00          | 0.97    | 0.91   | 0.93   |
| Q91VR8     | 101314      | Brk1         |                           |         |        |        | 0.88          | 1.22    | 1.05   |        |
| Q9D023     | 70456       | Brp44        | 1.02                      | 1.02    | 1.11   | 0.98   | 0.88          | 1.12    | 1.34   | 1.09   |
| P63030     | 55951       | Brp44l       |                           | 1.07    | 0.95   | 1.92   |               | 1.31    |        | 1.06   |
| Q5RJI5     | 381979      | Brsk1        |                           | 2.68    |        |        |               |         |        | 1.18   |
| P18572     | 12215       | Bsg          | 1.27                      |         | 1.25   |        | 1.49          | 1.02    | 1.08   | 1.11   |
| O88737     | 12217       | Bsn          | 2.03                      | 1.30    | 1.28   | 2.18   | 1.62          | 1.49    | 1.00   | 1.24   |
| Q80TK0     | 231570      | Btbd8        |                           |         |        | 1.13   |               |         |        |        |
| Q9CQH7     | 70533       | Btf3l4       | 1.31                      | 1.06    | 0.93   |        | 1.84          | 1.09    | 1.34   | 1.01   |
| Q91V76     | 70984       | C11Orf54     |                           |         | 1.47   |        |               | 1.16    |        | 1.09   |
| Q8R0P4     | 66273       | C11Orf67     |                           | 1.01    | 0.93   | 1.17   |               | 0.99    |        | 0.95   |
| Q8BZA9     | 319801      | C12Orf5      | 1.03                      |         |        |        | 0.24          |         |        |        |
| Q35127     | 14790       | C12Orf57     |                           |         | 0.98   |        |               | 0.92    |        |        |
| Q9CQE8     | 68045       | C14Orf166    | 1.10                      | 1.06    | 1.04   | 0.97   | 1.20          | 0.99    | 1.17   | 1.05   |
| Q9CR41     | 67693       | C15Orf63     |                           | 1.13    | 1.05   |        |               | 1.05    |        | 1.06   |
| Q9CPT4     | 28106       | C19Orf10     |                           | 1.01    | 0.72   | 0.90   | 0.99          |         |        | 0.91   |
| Q8R404     | 224904      | C19Orf70     | 1.30                      | 1.00    | 0.92   | 1.08   | 0.89          | 1.05    | 1.02   | 0.97   |
| Q8BHG2     | 74098       | C1Orf123     |                           | 0.99    | 0.89   |        |               | 0.99    |        | 0.90   |
| O35658     | 12261       | C1Qbp        | 0.88                      | 0.96    | 0.92   | 0.84   | 1.37          | 1.00    | 0.91   | 0.92   |
| Q02105     | 12262       | C1Qc         |                           |         |        |        |               |         |        | 1.35   |
| Q9D1K7     | 67326       | C20Orf27     | 1.29                      | 1.20    | 1.03   | 1.12   |               | 1.01    |        |        |
| Q9D7N9     | 71881       | C20Orf3      | 1.07                      |         |        |        |               |         |        |        |
| Q9D172     | 28295       | C21Orf33     | 0.98                      | 1.02    | 0.96   | 1.00   | 1.13          | 1.03    | 1.08   | 0.94   |
| Q99LF4     | 28088       | C22Orf28     | 1.01                      |         | 0.94   |        | 1.12          |         | 0.83   |        |
| Q9DB10     | 69029       | C22Orf32     |                           | 1.07    | 0.98   |        |               | 0.96    |        | 1.15   |
| Q80X80     | 71764       | C2Cd2l       |                           | 1.11    | 1.14   |        |               | 1.02    |        | 0.70   |
| Q8BR90     | 106064      | C5Orf51      | 1.19                      |         |        |        | 0.79          |         | 0.98   |        |

Supp. Table 1 (cont.)

| Uniprot_ID | Entrez_Gen | Symbol   | Developmental Myelination |         |        |        | Remyelination |         |        |        |
|------------|------------|----------|---------------------------|---------|--------|--------|---------------|---------|--------|--------|
|            |            |          | Mut-w11                   | Mut-w12 | WT-w11 | WT-w12 | Mut-w11       | Mut-w12 | WT-w11 | WT-w12 |
| P00920     | 12349      | Ca2      | 0.87                      | 0.83    | 0.84   | 0.73   | 0.66          | 0.69    | 0.57   | 0.59   |
| Q06138     | 12283      | Cab39    | 0.93                      | 1.19    | 1.06   | 1.02   | 1.06          | 1.04    | 0.70   | 1.06   |
| Q61290     | 12290      | Cacna1e  |                           | 0.91    | 1.21   |        |               | 1.12    |        | 1.00   |
| O08532     | 12293      | Cacna2d1 | 0.92                      | 0.99    | 1.06   | 0.75   | 1.12          | 1.01    | 0.92   | 1.01   |
| Q6PHS9     | 56808      | Cacna2d2 | 0.79                      |         |        |        |               |         |        |        |
| Q9Z1L5     | 12294      | Cacna2d3 | 1.01                      | 0.82    | 1.20   | 0.68   | 1.20          | 1.17    | 0.85   | 1.10   |
| Q9CXW3     | 12301      | Cacybp   | 1.32                      | 1.03    | 0.94   |        | 1.67          | 0.99    | 1.44   | 1.02   |
| Q8R5M8     | 54725      | Cadm1    |                           | 1.00    | 1.00   |        |               | 0.78    |        | 1.13   |
| Q8BLQ9     | 239857     | Cadm2    | 0.93                      | 0.98    | 1.07   | 0.98   | 1.27          | 1.00    | 0.87   | 0.98   |
| Q99N28     | 94332      | Cadm3    | 0.98                      | 0.98    | 1.05   | 0.93   | 1.08          | 1.01    | 0.98   | 0.94   |
| Q80TJ1     | 27062      | Cadps    | 0.99                      | 1.04    | 1.00   | 0.95   | 1.03          | 0.99    | 1.12   | 1.02   |
| Q8BYR5     | 320405     | Cadps2   |                           |         |        |        |               |         | 1.67   |        |
| P12658     | 12307      | Calb1    | 1.15                      | 1.03    | 1.07   | 1.10   | 1.12          | 0.96    | 1.11   | 0.98   |
| Q08331     | 12308      | Calb2    | 0.81                      | 1.05    | 0.50   | 0.59   | 0.79          | 0.67    | 1.27   | 0.74   |
| P14211     | 12317      | Calr     | 1.03                      | 1.01    | 1.05   | 0.95   | 1.49          | 1.01    | 0.86   | 1.14   |
| Q8BW96     | 227541     | Camk1d   |                           | 1.04    | 1.07   |        |               | 1.00    |        | 1.12   |
| P11798     | 12322      | Camk2a   | 0.96                      | 1.20    | 1.12   | 1.10   | 1.12          | 0.87    | 0.96   | 1.33   |
| P28652     | 12323      | Camk2b   | 1.10                      | 1.26    | 1.17   | 1.11   | 1.20          | 1.04    | 1.24   | 1.39   |
| Q6PHZ2     | 108058     | Camk2d   | 1.15                      | 1.27    | 0.98   | 1.03   | 1.18          |         | 1.06   | 1.33   |
| Q923T9     | 12325      | Camk2g   | 1.12                      | 1.03    | 1.18   | 1.13   | 0.99          | 1.03    | 1.18   | 1.41   |
| Q6QWF9     | 66259      | Camk2N1  |                           | 1.37    | 1.20   |        |               | 1.16    |        |        |
| P08414     | 12326      | Camk4    | 1.20                      | 0.96    |        | 0.99   | 0.96          |         | 0.98   | 1.13   |
| Q8C078     | 207565     | Camkk2   | 1.25                      |         | 1.27   | 1.23   | 1.20          | 1.14    | 0.98   |        |
| Q3UHL1     | 235604     | Camkv    | 1.87                      | 1.04    | 1.15   | 1.90   | 1.57          | 1.12    | 1.29   | 1.06   |
| Q8C1B1     | 67886      | Camsap2  |                           |         | 1.13   |        |               | 1.49    |        | 1.05   |
| Q80VC9     | 69697      | Camsap3  | 0.94                      |         |        |        |               |         |        |        |
| Q6ZQ38     | 71902      | Cand1    | 1.02                      | 1.00    | 0.92   | 1.11   | 0.95          | 0.88    | 1.01   | 0.92   |
| P35564     | 12330      | Canx     | 0.95                      | 1.01    | 0.93   | 0.84   | 1.21          | 0.97    | 1.05   | 0.95   |
| P40124     | 12331      | Cap1     | 3.39                      | 1.02    | 1.14   | 3.12   | 3.73          | 0.92    | 2.94   | 1.06   |
| Q9CYT6     | 67252      | Cap2     | 1.12                      | 1.02    | 1.19   | 1.22   | 0.94          | 1.16    | 1.19   | 1.27   |
| O08529     | 12334      | Capn2    | 0.87                      | 0.90    | 1.00   |        | 0.85          | 1.03    | 1.18   | 0.91   |
| O08688     | 12337      | Capn5    | 1.30                      | 1.27    | 1.13   |        | 1.13          | 1.39    |        | 0.91   |
| Q88456     | 12336      | Capns1   |                           | 1.16    |        |        |               | 0.95    |        |        |
| Q60865     | 53872      | Caprin1  | 1.56                      | 1.37    | 1.15   |        |               | 1.14    | 1.01   | 1.15   |
| P47754     | 12343      | Capza2   | 0.96                      | 1.04    | 1.05   | 0.98   | 1.02          | 0.93    | 0.99   | 1.11   |
| P47757     | 12345      | Capzb    | 0.86                      | 0.97    | 1.00   | 1.05   | 0.93          | 0.94    | 0.98   | 1.07   |
| Q9CR86     | 52502      | Carhsp1  | 1.03                      | 0.86    |        |        |               | 0.94    |        |        |
| Q9CZ42     | 69225      | Carkd    | 1.12                      | 0.89    |        |        | 0.97          | 1.05    | 1.15   |        |
| Q9ER72     | 27267      | Cars     |                           |         | 1.11   |        |               | 0.98    |        | 1.42   |
| O70589     | 12361      | Cask     |                           | 1.10    | 1.01   |        |               | 1.08    |        | 1.02   |
| Q6P9K8     | 268932     | Caskin1  | 3.36                      | 1.12    | 1.12   | 2.02   | 1.24          | 1.10    | 1.06   | 1.03   |
| P24270     | 12359      | Cat      |                           |         |        |        |               |         | 0.75   |        |
| P48758     | 12408      | Cbr1     | 1.07                      | 0.98    | 0.91   | 1.00   | 1.10          | 0.88    | 1.07   | 0.89   |
| P23198     | 12417      | Cbx3     | 1.03                      |         |        | 1.21   | 0.87          |         | 0.87   |        |
| Q8CI71     | 73288      | Ccdc132  | 1.13                      | 1.14    | 1.09   | 1.17   | 1.30          | 0.89    | 1.37   | 1.23   |
| Q8K003     | 66167 100  | Ccdc72   |                           | 0.86    | 1.09   |        |               | 0.81    |        | 0.93   |

Supp. Table 1 (cont.)

| Uniprot_ID | Entrez_Gen | Symbol    | Developmental Myelination |         |        |        | Remyelination |         |        |        |
|------------|------------|-----------|---------------------------|---------|--------|--------|---------------|---------|--------|--------|
|            |            |           | Mut-w11                   | Mut-w12 | WT-w11 | WT-w12 | Mut-w11       | Mut-w12 | WT-w11 | WT-w12 |
| Q8BGU5     | 67974      | Ccny      |                           | 1.13    | 1.32   |        |               | 1.10    |        | 1.17   |
| P80314     | 12461      | Cct2      | 0.93                      | 0.94    | 0.92   | 0.91   | 0.97          | 1.02    | 0.98   | 1.01   |
| P80318     | 12462      | Cct3      | 1.00                      | 0.98    | 0.91   | 1.01   | 0.74          | 0.92    | 1.04   | 0.99   |
| P80315     | 12464      | Cct4      | 1.07                      | 1.02    | 1.01   | 1.12   | 0.98          | 0.82    | 0.94   | 1.07   |
| P80316     | 12465      | Cct5      | 0.95                      | 0.98    | 0.97   | 0.86   | 0.72          | 0.90    | 1.10   | 1.02   |
| P80317     | 12466      | Cct6a     | 1.09                      | 1.01    | 0.95   | 1.15   | 0.90          | 1.11    | 1.11   | 1.04   |
| P80313     | 12468      | Cct7      | 1.06                      | 0.93    | 0.90   | 1.03   | 0.92          | 1.16    | 1.06   | 0.88   |
| P42932     | 12469      | Cct8      | 0.81                      | 1.02    | 0.91   |        | 0.86          | 0.88    | 1.16   | 0.96   |
| O54901     | 17470      | Cd200     | 1.46                      |         |        |        |               | 0.95    |        |        |
| Q61735     | 16423      | Cd47      | 0.91                      | 1.18    | 1.06   | 0.81   | 1.14          | 1.12    | 0.87   | 0.89   |
| P35762     | 12520      | Cd81      | 0.81                      | 0.86    | 0.84   | 0.98   | 0.74          | 0.91    | 0.93   | 0.78   |
| P40240     | 12527      | Cd9       | 0.67                      | 0.83    |        | 0.80   | 0.71          | 0.65    | 0.64   | 0.67   |
| Q61081     | 12539      | Cdc37     | 1.23                      | 0.96    | 0.85   | 1.12   | 1.73          | 0.91    | 1.42   | 0.99   |
| P60766     | 12540      | Cdc42     | 1.02                      | 1.01    | 1.07   | 1.09   | 1.17          | 0.99    | 1.04   | 1.03   |
| Q7TT50     | 217866     | Cdc42bpb  |                           | 1.10    | 1.31   | 2.00   |               | 1.17    | 0.91   | 1.00   |
| Q8BGH7     | 72729      | Cdc42se2  |                           | 1.10    |        |        |               | 0.98    |        |        |
| P15116     | 12558      | Cdh2      | 1.18                      | 1.25    | 1.02   | 1.09   | 1.03          | 1.18    | 1.13   | 1.22   |
| Q8VDP6     | 52858      | Cdipt     |                           |         | 1.16   |        |               | 1.23    |        |        |
| Q80YP0     | 69681      | Cdk3      |                           | 7.99    |        |        |               | 10.19   |        |        |
| P49615     | 12568      | Cdk5      | 0.98                      | 0.94    | 0.92   | 0.93   | 1.01          | 0.93    | 1.03   | 0.94   |
| Q99L43     | 110911     | Cds2      | 0.99                      | 1.30    |        | 0.88   | 0.80          | 1.16    | 1.11   |        |
| Q9Z0H4     | 14007      | Celf2     |                           | 0.86    | 1.09   | 1.24   | 0.63          |         | 1.06   | 1.05   |
| Q9JKC6     | 57754      | Cend1     | 1.21                      | 1.01    | 0.96   | 1.03   | 1.24          | 1.07    | 1.38   | 0.93   |
| Q569L8     | 219103     | Cenpj     |                           | 19.00   |        |        |               | 17.72   |        |        |
| Q9CXS4     | 73139      | Cenpv     | 1.39                      |         | 1.06   |        |               | 0.90    |        | 0.70   |
| Q6A065     | 545389     | Cep170    |                           |         | 1.32   |        |               |         |        |        |
| P18760     | 12631      | Cfl1      | 1.02                      | 0.97    | 0.99   | 1.00   | 0.87          | 0.98    | 1.03   | 1.00   |
| P45591     | 12632      | Cfl2      | 0.92                      | 0.97    | 0.87   | 1.01   | 0.86          | 0.96    | 1.46   | 0.91   |
| P46061     | 19387      | Chadl     |                           | 3.15    | 1.10   |        |               | 0.90    |        | 1.12   |
| Q9CRB9     | 66075      | Chchd3    | 0.94                      | 1.09    | 1.00   | 0.86   | 0.90          | 1.17    | 1.51   | 1.06   |
| Q91VN4     | 66098      | Chchd6    | 1.03                      | 0.99    | 1.00   | 1.07   | 1.17          | 0.93    | 1.24   |        |
| P70232     | 12661      | Chl1      |                           | 1.17    | 1.00   |        |               | 1.34    |        | 1.02   |
| Q9D8B3     | 75608      | Chmp4b    | 1.54                      | 1.28    |        |        | 1.11          | 1.18    | 1.20   | 1.05   |
| Q8R1T1     | 105513     | Chmp7     |                           |         |        | 1.45   |               |         | 1.38   |        |
| P61022     | 56398      | Chp       |                           |         | 0.85   |        | 1.10          |         |        |        |
| Q91WS0     | 52637      | Cisd1     | 1.07                      | 0.99    | 0.96   | 0.99   | 1.14          | 1.02    | 1.06   | 0.93   |
| Q9CQB5     | 67006      | Cisd2     |                           |         |        |        |               |         |        | 1.00   |
| P49025     | 12704      | Cit       |                           | 1.16    | 0.75   |        |               | 0.91    | 1.25   | 0.96   |
| Q8BMK4     | 216197     | Ckap4     |                           | 0.97    | 1.03   |        |               | 2.28    |        | 1.13   |
| A2AGT5     | 75786      | Ckap5     | 1.72                      | 1.00    | 0.99   | 1.62   | 1.02          | 1.09    | 1.56   | 0.87   |
| Q04447     | 12709      | Ckb       | 0.94                      | 0.99    | 0.99   | 0.97   | 0.94          | 0.99    | 0.94   | 0.92   |
| P30275     | 12716      | Ckmt1a/Ck | 1.08                      | 1.04    | 0.97   | 1.03   | 1.20          | 1.04    | 1.08   | 0.97   |
| Q80TV8     | 76707      | Clasp1    |                           | 0.77    |        |        |               |         |        |        |
| Q8BRT1     | 76499      | Clasp2    | 1.28                      | 1.05    | 1.12   | 1.05   | 0.94          | 1.03    | 1.22   | 0.97   |
| Q60771     | 18417      | Cldn11    | 0.83                      | 0.76    | 0.64   | 0.77   | 0.45          | 0.67    | 1.03   | 0.46   |
| Q9QYB1     | 29876      | Clic4     | 0.83                      | 0.90    | 0.81   |        |               | 1.00    | 0.89   | 0.82   |

Supp. Table 1 (cont.)

| Uniprot_ID | Entrez_Gen | Symbol  | Developmental Myelination |         |        |        | Remyelination |         |        |        |
|------------|------------|---------|---------------------------|---------|--------|--------|---------------|---------|--------|--------|
|            |            |         | Mut-w11                   | Mut-w12 | WT-w11 | WT-w12 | Mut-w11       | Mut-w12 | WT-w11 | WT-w12 |
| Q922J3     | 56430      | Clip1   |                           | 0.93    | 1.05   |        |               | 0.98    |        | 1.10   |
| Q9Z0H8     | 269713     | Clip2   | 1.18                      | 0.93    | 1.07   | 1.32   | 0.90          | 0.91    |        | 1.28   |
| O88696     | 53895      | Clpp    |                           | 0.99    |        |        | 1.76          | 1.14    |        | 1.08   |
| O08585     | 12757      | Clta    | 1.13                      | 1.10    | 1.03   | 1.25   | 1.08          | 1.00    | 0.90   | 1.06   |
| Q6IRU5     | 74325      | Cltb    | 1.41                      | 1.08    | 1.04   | 1.37   | 1.40          | 0.96    | 0.99   | 1.00   |
| Q68FD5     | 67300      | Cltc    | 0.99                      | 1.03    | 1.00   | 0.88   | 0.85          | 0.97    | 0.99   | 1.00   |
| Q06890     | 12759      | Clu     |                           |         |        |        |               | 1.26    |        |        |
| Q8R4N0     | 69634      | Clybl   |                           |         | 1.00   |        |               | 0.96    | 1.27   |        |
| Q9CPZ8     | 67899      | Cmc1    |                           | 0.95    | 0.85   |        |               | 1.08    |        |        |
| Q9DBP5     | 66588      | Cmpk1   | 0.95                      | 1.06    | 0.92   | 0.97   | 0.76          | 0.95    | 0.97   | 0.98   |
| Q9D6G9     | 67272      | Cmtm5   |                           |         |        |        |               | 1.22    |        |        |
| Q9D1A2     | 66054      | Cndp2   |                           |         |        | 1.35   |               |         | 1.00   |        |
| Q9DAW9     | 71994      | Cnn3    | 1.12                      |         |        |        | 0.96          |         | 1.85   | 1.35   |
| Q6ZQ08     | 234594     | Cnot1   | 1.08                      |         |        | 1.07   | 0.97          |         | 1.48   |        |
| P16330     | 12799      | Cnp     | 0.88                      | 0.80    | 0.77   | 0.77   | 0.54          | 0.81    | 0.85   | 0.68   |
| Q5M8N0     | 380686     | Cnrip1  | 1.03                      | 0.96    | 1.06   | 1.09   | 0.97          | 0.99    | 0.90   | 1.11   |
| P12960     | 12805      | Cntn1   | 0.85                      | 0.96    | 1.01   | 0.79   | 1.02          | 1.06    | 0.88   | 1.05   |
| Q61330     | 21367      | Cntn2   |                           | 1.20    | 1.17   |        |               | 1.37    |        | 0.68   |
| O54991     | 53321      | Cntnap1 | 1.17                      | 0.79    |        | 0.87   | 0.87          |         | 0.92   |        |
| Q9CPW0     | 66797      | Cntnap2 | 1.06                      | 0.93    | 0.84   | 0.75   | 0.95          | 0.91    | 0.98   | 1.04   |
| Q3V4B5     | 66200      | Commd6  |                           |         |        |        | 0.98          |         | 0.88   |        |
| Q8K2Q0     | 76501      | Commd9  | 1.12                      |         | 1.12   |        |               | 0.98    | 0.89   | 0.97   |
| O88587     | 12846      | Comt    |                           |         |        |        |               |         |        | 1.22   |
| Q8CIE6     | 12847      | Copa    | 0.70                      | 0.96    | 1.21   | 1.14   | 0.97          | 1.07    | 1.22   | 1.03   |
| Q9JIF7     | 70349      | Copb1   |                           | 1.14    | 1.07   | 1.08   | 1.07          | 1.49    | 1.28   | 1.21   |
| O55029     | 50797      | Copb2   |                           | 1.00    |        |        |               | 0.85    |        | 1.28   |
| Q9QZE5     | 54161      | Copg1   | 1.10                      | 0.99    | 1.19   |        | 1.18          | 0.87    | 0.63   | 1.07   |
| P61202     | 12848      | Cops2   | 1.32                      | 1.01    | 1.02   | 1.17   | 1.11          |         | 1.08   | 0.95   |
| O88543     | 26572      | Cops3   |                           |         | 1.18   | 0.92   | 0.81          | 1.47    | 1.28   |        |
| O88544     | 26891      | Cops4   | 1.10                      | 0.84    | 0.98   | 1.22   | 0.83          | 0.90    | 1.21   | 0.95   |
| O35864     | 26754      | Cops5   | 1.52                      | 1.03    | 1.11   | 1.12   |               | 0.97    | 1.05   | 1.06   |
| O88545     | 26893      | Cops6   | 0.99                      | 0.96    | 1.00   | 1.20   |               | 0.94    | 1.06   | 1.00   |
| Q9CZ04     | 26894      | Cops7a  |                           | 0.92    | 0.81   | 1.04   |               | 0.87    | 1.02   | 0.93   |
| Q8BV13     | 26895      | Cops7b  |                           |         |        |        |               | 1.08    |        |        |
| Q8V BV7    | 108679     | Cops8   | 0.91                      | 1.09    |        |        | 0.72          | 0.89    | 1.07   | 0.92   |
| P61924     | 56447      | Copz1   | 1.13                      | 1.46    | 1.08   |        | 0.88          | 1.33    | 1.06   |        |
| Q8K1Z0     | 67914      | Coq9    |                           | 1.00    |        |        |               | 0.94    |        | 0.89   |
| O89053     | 12721      | Coro1a  | 1.06                      | 1.10    | 1.16   | 1.25   | 1.12          | 1.07    | 1.01   | 1.26   |
| Q9WUM4     | 23790      | Coro1C  | 0.73                      | 0.91    | 0.84   | 0.74   | 0.89          | 0.83    | 1.06   | 0.86   |
| Q9CQI6     | 72042      | Cotl1   | 0.98                      | 0.99    | 0.99   | 0.99   | 1.01          | 0.98    | 1.01   | 0.96   |
| P56394     | 12856      | Cox17   |                           | 1.33    | 1.18   |        |               | 1.08    |        |        |
| P00405     | 17709      | Cox2    | 0.96                      | 0.97    | 1.03   | 0.84   | 0.81          | 1.10    | 1.20   | 1.02   |
| P19783     | 12857      | Cox4I1  | 1.04                      | 0.96    | 0.95   | 0.87   | 1.04          | 1.02    | 1.04   | 0.99   |
| P12787     | 12858      | Cox5a   | 1.02                      | 0.96    | 1.03   | 0.78   | 1.00          | 1.00    | 1.06   | 0.95   |
| P19536     | 12859      | Cox5b   | 1.04                      | 0.96    | 1.02   | 0.82   | 0.80          | 1.07    | 1.28   | 0.98   |
| P43024     | 12861      | Cox6a1  | 0.99                      |         | 1.01   | 1.31   | 0.99          | 1.01    | 1.04   | 0.68   |

Supp. Table 1 (cont.)

| Uniprot_ID | Entrez_Gen | Symbol        | Developmental Myelination |         |        |        | Remyelination |         |        |        |
|------------|------------|---------------|---------------------------|---------|--------|--------|---------------|---------|--------|--------|
|            |            |               | Mut-w11                   | Mut-w12 | WT-w11 | WT-w12 | Mut-w11       | Mut-w12 | WT-w11 | WT-w12 |
| P56391     | 110323     | Cox6b1        | 0.93                      | 0.95    | 1.03   | 0.67   | 1.06          | 0.99    | 1.02   | 0.97   |
| Q9CPQ1     | 621837 12  | Cox6C         | 0.96                      | 0.93    | 1.00   | 0.65   | 1.00          | 1.00    | 1.01   | 1.01   |
| P48771     | 12866      | Cox7a2        | 1.00                      | 0.98    | 1.01   | 1.02   |               | 1.11    | 1.77   | 1.00   |
| P56393     | 66142      | Cox7b         |                           | 1.08    | 1.27   |        |               |         |        |        |
| P17665     | 12867 100  | Cox7C/gm10012 |                           | 1.04    | 1.06   |        |               |         |        | 1.12   |
| P63040     | 12889      | Cplx1         | 1.16                      | 1.03    | 1.03   | 1.32   | 1.21          | 1.04    | 1.11   | 1.05   |
| P84086     | 12890      | Cplx2         | 0.97                      | 1.07    | 1.01   |        | 1.26          |         | 0.88   | 1.01   |
| Q9Z140     | 12891      | Cpne6         | 1.37                      | 0.96    | 1.21   | 1.08   | 1.21          | 1.07    | 0.98   | 1.17   |
| Q1RLL3     | 211232     | Cpne9         |                           |         |        | 0.89   |               |         |        |        |
| P47934     | 12908      | Crat          |                           | 0.93    |        |        |               | 0.99    |        | 1.22   |
| Q9DCT8     | 68337      | Crip2         | 1.53                      | 1.11    | 1.13   | 1.21   | 1.39          | 1.16    | 1.31   | 1.08   |
| Q64010     | 12928      | Crk           | 0.82                      | 1.03    | 1.13   | 1.30   | 0.80          | 1.17    | 0.81   | 1.09   |
| P47941     | 12929      | Crkl          | 1.89                      |         |        |        |               | 1.03    |        |        |
| P97427     | 12933      | Crmp1         | 1.07                      | 1.01    | 1.07   | 1.05   | 0.94          | 1.02    | 1.04   | 1.04   |
| Q9DC50     | 74114      | Crot          | 0.83                      | 0.97    |        |        |               |         |        |        |
| P23927     | 12955      | Cryab         | 0.75                      | 0.84    | 0.78   | 0.85   | 0.22          | 0.84    | 0.86   | 0.70   |
| O54983     | 12971      | Crym          | 0.95                      | 0.93    | 0.95   | 0.90   | 0.99          | 0.88    | 0.82   | 0.91   |
| P47199     | 12972      | Cryz          | 1.05                      | 1.05    | 2.08   |        |               | 1.08    | 1.10   | 1.12   |
| Q921W4     | 66609      | Cryzl1        | 1.15                      |         | 0.80   |        |               |         |        |        |
| Q9CZU6     | 12974      | Cs            | 1.01                      | 1.00    | 0.97   | 0.99   | 0.86          | 0.97    | 1.07   | 0.93   |
| Q9ERK4     | 110750     | Cse1l         | 1.03                      | 1.10    | 1.25   | 1.00   | 0.92          | 1.01    | 0.97   | 0.97   |
| Q8BK63     | 93687      | Csnk1a1       | 0.95                      | 4.41    | 0.90   |        |               | 2.27    | 0.98   | 1.63   |
| Q60737     | 12995      | Csnk2a1       | 1.39                      | 1.07    | 1.21   | 1.40   | 1.27          | 1.03    | 1.32   | 0.97   |
| O54833     | 13000      | Csnk2a2       | 1.11                      | 0.93    | 1.15   | 1.25   | 0.90          | 0.97    | 1.00   | 0.95   |
| P67871     | 13001      | Csnk2b        |                           |         | 1.31   |        |               |         |        |        |
| Q71M36     | 29873      | Cspg5         | 0.99                      |         |        |        |               |         |        |        |
| P97315     | 13007      | Csrp1         | 0.88                      | 0.92    | 0.82   | 1.14   | 0.96          | 0.95    | 0.99   | 0.86   |
| P21460     | 13010      | Cst3          | 1.02                      | 0.84    | 1.09   |        | 0.88          | 0.82    |        | 1.02   |
| Q62426     | 13014      | Cstb          | 1.02                      | 1.01    | 0.97   | 1.15   | 0.84          | 1.00    | 0.81   | 0.91   |
| O88712     | 13016      | Ctbp1         | 1.41                      | 1.07    | 1.12   |        | 1.08          | 1.14    | 1.37   | 1.15   |
| Q61301     | 12386      | Ctnna2        | 1.22                      | 1.28    | 1.01   | 1.13   | 1.25          | 1.20    | 1.11   | 1.36   |
| Q02248     | 12387      | Ctnnb1        | 1.25                      | 1.06    | 1.09   | 1.33   | 0.96          | 1.11    | 1.34   | 1.15   |
| O35927     | 18163      | Ctnnd2        |                           | 1.31    | 1.45   |        |               | 1.19    |        | 0.99   |
| P10605     | 13030      | Ctsb          | 0.93                      | 1.13    | 1.14   | 0.89   | 1.06          | 0.90    | 0.86   | 1.09   |
| P18242     | 13033      | Ctsd          | 1.23                      | 1.15    | 1.15   | 1.32   | 1.23          | 1.37    | 2.09   | 1.15   |
| Q60598     | 13043      | Cttn          | 1.47                      | 1.07    | 1.18   | 1.67   | 1.28          | 1.14    | 1.00   | 1.09   |
| Q9WTX6     | 26965      | Cul1          | 1.09                      |         |        |        |               |         |        |        |
| Q9D4H8     | 71745      | Cul2          |                           | 0.91    | 0.94   |        |               | 0.83    |        | 0.89   |
| Q9JLV5     | 26554      | Cul3          | 0.93                      | 1.00    | 0.93   | 1.02   | 1.06          | 0.92    | 0.93   | 0.94   |
| Q3TCH7     | 99375      | Cul4a         |                           | 1.00    | 1.16   |        |               | 1.08    |        | 0.86   |
| Q9D5V5     | 75717      | Cul5          | 1.11                      | 1.07    | 0.92   | 1.02   | 0.91          | 0.93    | 0.83   | 0.83   |
| P56395     | 109672     | Cyb5a         |                           | 1.07    | 0.78   |        | 1.09          | 1.41    |        | 1.08   |
| Q9CQX2     | 66427      | Cyb5b         | 0.91                      | 1.00    | 0.95   | 0.91   | 1.03          | 0.96    | 0.98   | 1.00   |
| Q9DB73     | 72017      | Cyb5R1        |                           |         |        | 1.83   |               | 1.12    |        | 1.04   |
| Q9DCN2     | 109754     | Cyb5R3        | 0.92                      | 0.98    | 0.89   | 0.84   | 1.45          | 1.00    | 0.98   | 1.06   |
| Q9D0M3     | 66445      | Cyc1          | 0.94                      | 0.94    | 0.95   | 0.85   | 1.07          | 1.03    | 1.06   | 1.00   |

Supp. Table 1 (cont.)

| Uniprot_ID | Entrez_Gen | Symbol | Developmental Myelination |         |        |        | Remyelination |         |        |        |
|------------|------------|--------|---------------------------|---------|--------|--------|---------------|---------|--------|--------|
|            |            |        | Mut-w11                   | Mut-w12 | WT-w11 | WT-w12 | Mut-w11       | Mut-w12 | WT-w11 | WT-w12 |
| P62897     | 13063      | Cycs   | 0.98                      | 0.98    | 0.92   | 0.98   | 1.04          | 0.98    | 0.92   | 0.91   |
| Q7TMB8     | 20430      | Cyfp1  | 1.09                      | 1.03    |        | 1.18   | 0.90          | 1.09    | 1.10   | 1.11   |
| Q5SQX6     | 76884      | Cyfp2  | 1.12                      | 1.03    | 1.00   | 1.10   | 1.01          | 1.01    | 1.11   | 1.05   |
| Q9CX80     | 114886     | Cygb   |                           |         | 0.76   |        | 0.88          |         |        |        |
| Q3UHC7     | 69601      | Dab2lp |                           |         |        |        |               |         |        | 1.08   |
| Q922B2     | 226414     | Dars   |                           |         |        |        |               |         |        | 1.42   |
| P31786     | 13167      | Dbi    | 0.67                      | 0.96    | 0.84   | 0.71   | 1.01          | 0.81    | 0.91   | 0.89   |
| Q9QXS6     | 56320      | Dbn1   | 1.52                      | 1.10    | 1.23   | 1.72   | 1.14          | 0.97    | 1.34   | 1.17   |
| Q62418     | 13169      | Dbnl   | 0.58                      | 1.06    | 1.10   | 1.33   | 1.22          | 0.97    | 1.28   | 1.01   |
| Q9JLM8     | 13175      | Dclk1  | 1.11                      | 1.05    | 1.19   | 1.33   | 0.95          | 0.95    | 1.01   | 1.06   |
| Q6PGN3     | 70762      | Dclk2  | 1.13                      | 0.75    |        |        | 0.84          |         |        |        |
| O08788     | 13191      | Dctn1  | 0.70                      | 1.05    | 0.94   | 0.92   | 0.65          | 0.92    | 0.76   | 0.91   |
| Q99KJ8     | 69654      | Dctn2  | 1.11                      | 0.98    | 1.09   | 1.05   | 0.98          | 0.93    | 1.09   | 0.96   |
| Q9Z0Y1     | 53598      | Dctn3  |                           | 0.95    | 0.92   |        |               | 0.94    |        | 0.90   |
| Q9QZB9     | 59288      | Dctn5  |                           |         |        |        |               |         |        | 1.26   |
| Q9WUB4     | 22428      | Dctn6  | 1.08                      | 0.98    | 2.06   |        | 0.96          |         | 0.95   | 1.08   |
| Q9CWS0     | 69219      | Ddah1  | 0.95                      | 1.01    | 0.98   | 1.10   | 1.09          | 0.87    | 1.10   | 0.99   |
| Q99LD8     | 51793      | Ddah2  |                           | 1.07    | 1.10   | 1.14   |               | 0.90    | 1.33   | 1.00   |
| Q3U1J4     | 13194      | Ddb1   | 0.82                      | 0.90    | 0.87   | 0.77   | 1.03          | 0.93    | 0.72   | 0.87   |
| O35215     | 13202      | Ddt    | 0.83                      | 0.96    | 0.83   | 0.86   | 0.98          | 0.92    | 0.91   | 0.80   |
| Q91VR5     | 104721     | Ddx1   | 0.94                      | 1.06    | 1.00   | 1.19   | 1.05          | 1.03    | 1.01   | 1.07   |
| Q9Z1N5     | 53817      | Ddx39b | 1.25                      | 1.01    | 1.18   | 1.02   |               | 1.13    | 1.01   | 0.95   |
| Q62167     | 13205      | Ddx3X  | 1.23                      | 0.94    | 1.13   | 1.23   | 1.02          | 1.02    | 1.18   | 1.02   |
| Q61496     | 13206      | Ddx4   | 0.98                      | 0.92    | 0.91   |        | 0.98          | 0.94    |        | 0.73   |
| Q61656     | 13207      | Ddx5   | 1.24                      | 1.03    | 1.04   |        | 1.08          | 1.03    |        | 1.05   |
| P54823     | 13209      | Ddx6   | 1.83                      |         | 1.14   | 2.05   | 1.64          |         | 1.40   |        |
| Q9CQ62     | 67460      | Decr1  | 0.72                      | 0.98    | 0.84   | 1.19   | 1.53          | 0.97    |        | 0.92   |
| Q9CQJ6     | 68184      | Denr   |                           | 1.12    |        |        |               |         |        |        |
| Q6NS52     | 217480     | Dgkb   | 1.25                      | 0.99    | 1.50   |        | 1.16          | 1.11    |        | 1.07   |
| O35286     | 13204      | Dhx15  |                           | 1.82    |        |        |               | 1.24    |        | 1.09   |
| Q6PGC1     | 218629     | Dhx29  |                           |         |        | 1.55   |               |         |        |        |
| O70133     | 13211      | Dhx9   | 0.97                      | 0.89    | 0.94   | 0.89   | 0.85          | 0.97    | 0.93   | 1.04   |
| O08808     | 13367      | Diaph1 | 1.09                      |         |        |        |               |         |        |        |
| Q3UH60     | 239667     | Dip2b  |                           | 0.83    |        |        |               | 0.91    |        |        |
| Q5PR73     | 68203      | Diras2 | 1.26                      | 0.92    | 1.14   |        | 0.92          | 1.11    | 0.95   | 1.04   |
| Q8BMF4     | 235339     | Dlat   | 2.17                      | 1.04    | 0.91   | 1.78   | 2.47          | 1.02    | 2.28   | 1.00   |
| O08749     | 13382      | Dld    | 0.96                      | 1.02    | 0.98   | 0.94   | 1.07          | 0.93    | 0.94   | 0.96   |
| Q811D0     | 13383      | Dlg1   | 0.99                      | 0.86    | 1.16   | 1.02   | 1.08          | 1.30    | 1.34   | 1.01   |
| P70175     | 53310      | Dlg3   | 1.12                      | 1.01    | 1.09   | 1.30   | 1.20          | 1.00    | 1.02   | 1.14   |
| Q62108     | 13385      | Dlg4   | 1.05                      | 1.23    | 1.17   | 1.01   | 1.14          | 1.14    | 1.06   | 1.30   |
| Q9D2G2     | 78920      | Dlst   | 0.09                      | 0.94    |        | 0.08   | 0.86          | 0.91    | 0.16   | 0.91   |
| Q6PNC0     | 240283     | Dmxl1  |                           |         |        | 1.63   |               |         |        |        |
| Q8BPN8     | 235380     | Dmxl2  | 1.17                      | 1.09    | 1.15   | 1.23   | 0.96          | 1.20    | 0.95   | 1.08   |
| P63037     | 15502      | Dnaja1 | 0.94                      | 1.06    | 1.05   |        | 1.07          | 0.98    | 1.18   | 0.94   |
| Q9QYJ0     | 56445      | Dnaja2 | 1.52                      | 1.01    | 1.01   | 1.43   | 1.11          | 0.93    | 1.00   | 1.02   |
| Q99M87     | 83945      | Dnaja3 |                           |         |        | 1.06   | 1.55          |         | 1.08   |        |





Supp. Table 1 (cont.)

| Uniprot_ID | Entrez_Gen | Symbol      | Developmental Myelination |         |        |        | Remyelination |         |        |        |
|------------|------------|-------------|---------------------------|---------|--------|--------|---------------|---------|--------|--------|
|            |            |             | Mut-w11                   | Mut-w12 | WT-w11 | WT-w12 | Mut-w11       | Mut-w12 | WT-w11 | WT-w12 |
| Q6ZQ18     | 668212     | Efr3b       |                           | 1.49    |        |        |               |         |        |        |
| O08810     | 20624      | Eftud2      |                           |         |        | 1.26   | 0.87          | 1.12    | 0.92   |        |
| Q9QXY6     | 57440      | Ehd3        | 0.94                      | 0.96    | 1.04   | 0.96   | 0.98          | 0.84    | 0.98   | 0.98   |
| P48024     | 20918      | Eif1        | 0.96                      | 0.95    | 0.99   | 0.30   | 0.54          | 0.96    | 1.17   | 0.97   |
| Q8BMJ3     | 66235      | Eif1ax      | 1.09                      | 0.97    |        |        | 1.26          | 0.73    | 0.80   | 1.23   |
| Q99LD9     | 217715     | Eif2b2      | 0.90                      | 0.72    | 0.95   |        |               | 0.67    | 1.15   | 0.91   |
| Q6ZWX6     | 13665      | Eif2s1      | 0.95                      | 1.00    | 1.23   | 1.01   |               | 0.87    | 1.03   | 1.35   |
| P23116     | 13669      | Eif3a       | 1.26                      | 1.00    | 0.91   | 1.21   | 1.02          | 1.04    | 1.34   | 1.05   |
| Q8JZQ9     | 27979      | Eif3b       |                           |         |        |        |               | 1.84    |        | 1.53   |
| Q8R1B4     | 56347      | Eif3c/Eif3c | 1.32                      | 1.14    | 1.20   | 1.35   | 1.30          | 0.92    | 1.24   | 1.06   |
| Q9DCH4     | 66085      | Eif3f       |                           |         |        |        | 1.11          |         |        |        |
| Q91WK2     | 68135      | Eif3h       | 0.98                      | 0.91    | 1.16   |        | 0.90          | 0.92    | 0.88   | 0.97   |
| Q9QZD9     | 54709      | Eif3l       |                           | 1.17    |        |        |               |         |        |        |
| Q99JX4     | 98221      | Eif3M       | 1.01                      |         |        | 1.17   | 1.13          | 1.24    | 1.05   |        |
| P60843     | 13681      | Eif4a1      | 1.01                      | 0.85    | 0.99   |        | 1.23          | 1.02    | 1.09   | 1.08   |
| P10630     | 13682      | Eif4a2      | 1.17                      | 1.08    | 1.10   | 1.06   | 1.09          | 1.11    | 1.16   | 1.07   |
| Q91VC3     | 192170     | Eif4a3      | 0.85                      |         |        |        |               |         | 1.08   |        |
| Q8BGD9     | 75705      | Eif4b       | 1.29                      | 1.05    | 1.02   | 1.27   | 1.12          | 0.98    | 1.04   | 1.01   |
| P63073     | 13684      | Eif4e       | 1.06                      | 1.02    | 1.00   | 1.19   | 0.98          | 1.05    | 1.08   | 1.08   |
| Q6NZJ6     | 208643     | Eif4g1      | 1.70                      | 1.10    | 1.06   | 1.53   |               | 1.13    | 1.33   | 1.17   |
| Q62448     | 13690      | Eif4g2      |                           | 1.56    |        |        |               | 0.97    |        |        |
| Q80XI3     | 230861     | Eif4g3      |                           | 1.11    | 1.02   | 2.55   |               | 0.94    | 1.30   | 1.02   |
| Q9WUK2     | 22384      | Eif4h       | 1.15                      | 1.00    |        |        |               | 0.95    | 0.94   | 1.03   |
| P63242     | 276770     | Eif5a       | 0.91                      | 0.92    | 1.01   | 0.85   | 1.03          | 0.93    | 0.98   | 0.96   |
| P70372     | 15568      | Elavl1      | 0.89                      | 0.91    |        |        |               | 1.06    | 0.95   | 0.89   |
| Q8BHL5     | 140579     | Elmo2       |                           | 1.30    | 1.23   |        |               | 0.99    |        | 1.28   |
| P17182     | 13806 433  | Eno1        | 0.93                      | 1.00    | 1.03   | 0.93   | 1.23          | 0.96    | 0.93   | 1.01   |
| P17183     | 13807      | Eno2        | 0.94                      | 1.02    | 1.00   | 0.90   | 1.26          | 1.00    | 0.97   | 0.99   |
| Q8BGB7     | 67870      | Enoph1      | 0.59                      | 0.97    | 0.24   |        | 0.96          | 0.59    | 0.61   | 0.88   |
| Q8BGN3     | 320981     | Enpp6       | 1.10                      |         |        | 0.65   | 0.66          |         | 0.81   |        |
| P60840     | 56205      | Ensa        | 1.02                      | 0.99    | 1.15   | 1.01   | 1.23          | 1.06    |        | 0.92   |
| Q9JIX0     | 223527     | Eny2        |                           | 1.03    |        |        |               | 0.87    |        |        |
| Q9Z2H5     | 13821      | Epb41I1     | 1.29                      | 1.14    | 1.07   | 1.19   | 1.04          | 1.09    | 1.00   | 1.01   |
| O70318     | 13822      | Epb41I2     | 1.21                      | 1.19    | 0.98   | 1.31   | 1.31          | 0.91    | 1.22   | 1.11   |
| Q9WV92     | 13823      | Epb41I3     | 1.02                      | 0.91    | 0.88   | 0.92   | 0.99          | 0.92    | 1.16   | 0.92   |
| Q9WV69     | 13829      | Epb49       |                           |         | 1.07   |        |               |         |        | 1.25   |
| Q99M71     | 105298     | Epdr1       |                           |         | 1.14   |        |               | 0.76    |        | 0.80   |
| Q03137     | 13838      | Epha4       |                           |         |        |        |               | 1.45    |        |        |
| Q8VEH5     | 77781      | Epm2aip1    | 1.13                      |         |        | 1.65   | 0.73          | 1.94    | 1.11   |        |
| Q80VP1     | 13854      | Epn1        | 1.56                      | 1.01    | 1.09   | 1.37   | 1.28          | 0.98    | 1.14   | 1.00   |
| Q8CHU3     | 13855      | Epn2        | 1.72                      |         |        | 1.18   | 1.27          |         | 1.13   |        |
| Q91W69     | 71889      | Epn3        |                           |         | 1.15   |        |               | 1.04    |        | 1.08   |
| Q8R0W0     | 223650     | Eppk1       |                           | 0.95    |        |        |               |         |        |        |
| Q8CGC7     | 107508     | Eprs        | 1.39                      | 0.94    | 1.07   | 1.23   | 1.06          | 1.12    | 1.41   | 1.15   |
| Q60902     | 13859      | Eps15I1     |                           | 4.72    |        |        | 1.05          |         |        | 1.26   |
| Q6PH08     | 238988     | Erc2        | 1.30                      | 1.26    | 1.08   | 1.08   | 1.08          | 1.23    | 0.99   | 1.52   |

Supp. Table 1 (cont.)

| Uniprot_ID | Entrez_Gen | Symbol       | Developmental Myelination |         |        |        | Remyelination |         |        |        |
|------------|------------|--------------|---------------------------|---------|--------|--------|---------------|---------|--------|--------|
|            |            |              | Mut-w11                   | Mut-w12 | WT-w11 | WT-w12 | Mut-w11       | Mut-w12 | WT-w11 | WT-w12 |
| Q9DC16     | 67458      | Ergic1       |                           | 1.06    |        | 2.00   |               | 1.04    |        | 0.94   |
| P84089     | 13877      | Erh          | 1.01                      | 0.99    | 1.09   |        | 1.07          | 1.02    | 0.93   | 1.08   |
| Q8BFZ9     | 244373     | Erlin2       |                           |         |        |        |               |         |        | 0.97   |
| Q5EBJ4     | 77767      | Ernm         |                           | 2.43    | 0.90   |        |               |         |        | 0.71   |
| P57759     | 67397      | Erp29        |                           | 0.90    | 0.89   | 0.84   |               | 1.07    | 0.90   | 1.10   |
| Q9R0P3     | 13885      | Esd          | 1.20                      | 0.88    |        | 0.45   |               | 1.03    |        | 0.84   |
| Q99LC5     | 110842     | Etfb         | 0.88                      | 0.99    | 0.88   | 1.02   | 0.99          | 0.97    | 1.03   | 0.90   |
| Q9DCW4     | 110826     | Etfb         | 0.99                      | 0.95    | 0.82   | 0.92   | 0.88          | 0.91    | 0.94   | 0.85   |
| Q921G7     | 66841      | Etfhdh       |                           | 0.91    | 0.85   | 0.77   | 1.09          | 0.93    | 0.90   | 0.88   |
| P70429     | 14026      | Evl          | 1.19                      | 0.63    | 0.99   |        | 0.99          |         | 1.40   | 1.04   |
| Q9D952     | 14027      | Evpl         |                           | 1.20    | 0.83   |        |               | 1.18    |        | 0.55   |
| Q8R3S6     | 69940      | Exoc1        |                           | 1.02    | 0.97   |        |               | 1.00    |        | 0.90   |
| Q9D4H1     | 66482      | Exoc2        |                           |         | 0.94   |        |               | 0.91    |        |        |
| O35382     | 20336      | Exoc4        | 1.12                      | 1.03    | 1.10   | 1.00   | 1.06          | 0.98    | 1.00   | 1.12   |
| Q3TPX4     | 105504     | Exoc5        |                           |         | 1.53   |        |               |         |        | 1.31   |
| O35250     | 53413      | Exoc7        |                           |         | 0.81   |        |               |         |        |        |
| Q6PGF7     | 102058     | Exoc8        | 1.18                      | 0.99    | 1.02   |        | 1.00          | 0.90    | 1.54   | 1.05   |
| Q8C163     | 208194     | Exog         | 1.38                      |         | 1.38   |        |               | 1.12    |        | 1.09   |
| Q0VAV2     | 320051     | Exph5        |                           |         | 4.07   |        |               |         |        |        |
| P26040     | 22350      | Ezr          | 0.95                      | 0.91    | 0.97   | 0.94   | 1.64          | 1.00    | 0.93   | 1.04   |
| O08914     | 14073      | Faah         | 1.22                      |         |        | 0.93   | 1.02          |         | 1.12   |        |
| P11404     | 14077      | Fabp3        | 1.06                      | 0.99    | 1.03   | 1.05   | 1.09          | 1.05    |        | 1.08   |
| Q05816     | 16592      | Fabp5        | 1.06                      | 0.93    | 0.81   | 1.07   | 1.13          | 1.01    | 0.89   | 1.00   |
| P51880     | 12140      | Fabp7        | 1.27                      | 1.51    | 1.22   | 1.36   | 1.42          | 1.02    | 1.32   | 1.15   |
| Q8R0F8     | 68636      | Fahd1        | 0.77                      | 0.93    | 0.86   |        | 0.81          | 0.79    | 0.92   | 0.97   |
| Q3TC72     | 68126      | Fahd2a       | 0.97                      | 0.90    | 0.83   |        | 0.96          | 0.87    |        | 0.89   |
| Q6A0A9     | 218236     | Fam120a      | 1.57                      | 1.00    | 1.23   | 1.86   | 1.27          | 1.06    | 1.42   | 1.19   |
| Q9CR98     | 66488      | Fam136a      |                           | 0.86    | 0.92   | 2.05   |               | 0.88    |        | 0.94   |
| Q9D6U8     | 70186      | Fam162a      | 0.87                      | 0.90    | 0.90   | 1.51   |               | 1.01    | 1.85   | 0.99   |
| Q3UGS4     | 192173     | Fam195b      | 0.61                      | 0.88    | 1.14   | 0.26   |               | 0.94    | 0.58   | 0.97   |
| Q8BGY7     | 108654     | Fam210a      | 0.99                      |         | 0.92   |        |               |         |        | 0.94   |
| Q9CYH2     | 70564      | Fam213a      | 0.94                      | 1.19    | 0.99   | 0.97   | 0.79          | 1.03    | 0.84   | 1.17   |
| Q9DB60     | 66469      | Fam213b      | 1.30                      | 1.00    | 0.91   |        |               | 0.88    | 1.19   | 0.94   |
| Q8BHZ0     | 76820      | Fam49a       |                           |         | 1.35   | 1.19   | 0.78          | 0.90    | 0.90   | 1.23   |
| Q921M7     | 223601     | Fam49b       | 1.23                      | 0.91    | 1.01   | 1.12   | 0.99          | 0.98    | 1.14   | 1.01   |
| Q9CWE0     | 76824      | Fam54b       |                           |         |        |        |               |         | 1.68   |        |
| Q3V2J0     | 436062     | Fam92b       |                           | 1.04    | 0.91   |        |               | 0.60    |        | 0.71   |
| Q80VD1     | 68215      | Fam98b       |                           | 1.09    |        |        | 1.08          | 1.17    |        | 1.00   |
| Q8C0C7     | 66590      | Farsa        | 1.36                      |         |        | 1.02   |               |         | 1.13   |        |
| P19096     | 14104      | Fasn         | 0.96                      | 1.00    | 0.93   | 0.85   | 0.77          | 1.06    | 0.93   | 0.86   |
| P62862     | 14109      | Fau          | 1.68                      | 1.09    | 0.98   | 1.82   | 1.88          | 0.91    | 1.68   | 1.15   |
| Q80UW2     | 230904     | Fbxo2        |                           | 0.95    | 0.76   |        |               | 1.04    |        | 0.93   |
| Q920E5     | 110196     | Fdps         | 0.91                      | 0.96    | 0.99   | 1.34   | 0.80          | 0.83    | 0.91   | 0.88   |
| Q8CIB5     | 218952     | Fermt2       |                           |         | 1.88   |        | 0.90          |         |        |        |
| P97807     | 14194      | Fh           | 1.04                      | 1.03    | 0.93   | 0.92   | 0.95          | 1.04    | 1.08   | 0.97   |
| Q9CQ92     | 66437      | Fis1 (Includ | 0.85                      | 1.00    | 0.83   | 1.00   | 1.01          | 0.98    | 0.97   | 0.92   |

Supp. Table 1 (cont.)

| Uniprot_ID | Entrez_Gen | Symbol    | Developmental Myelination |         |        |        | Remyelination |         |        |        |
|------------|------------|-----------|---------------------------|---------|--------|--------|---------------|---------|--------|--------|
|            |            |           | Mut-w11                   | Mut-w12 | WT-w11 | WT-w12 | Mut-w11       | Mut-w12 | WT-w11 | WT-w12 |
| P26883     | 14225      | Fkbp1a    |                           | 0.85    | 0.91   | 0.98   | 1.13          | 0.89    |        | 0.93   |
| P45878     | 14227      | Fkbp2     | 1.07                      | 1.01    | 0.78   | 0.91   | 1.23          | 0.98    | 0.87   | 0.96   |
| Q62446     | 30795      | Fkbp3     | 0.87                      | 1.04    | 0.83   | 0.98   | 1.12          | 0.93    | 0.99   | 1.01   |
| P30416     | 14228      | Fkbp4     |                           | 1.12    | 0.99   | 1.12   |               | 0.61    | 0.95   | 1.04   |
| Q8BTM8     | 192176     | Flna      |                           | 1.02    |        | 1.35   |               | 1.11    | 2.40   | 1.18   |
| O08917     | 14251      | Flot1     |                           |         | 1.04   |        | 0.69          | 1.19    |        |        |
| Q8K274     | 238024     | Fn3Krp    |                           | 0.98    | 1.01   |        |               | 1.03    |        | 1.02   |
| Q64731     | 14241      | Foxl1     | 7.60                      | 1.05    |        |        |               | 1.20    |        |        |
| Q61553     | 14086      | Fscn1     | 0.98                      | 0.93    | 1.10   | 1.23   | 0.95          | 0.98    | 0.97   | 1.03   |
| P09528     | 14319      | Fth1      | 0.88                      | 0.97    | 0.84   | 0.71   | 1.02          | 1.07    | 0.90   | 0.87   |
| Q91WJ8     | 51886      | Fubp1     | 2.13                      | 0.88    | 1.12   |        | 2.17          | 1.18    | 1.70   | 0.92   |
| Q9DB70     | 72018      | Fundc1    |                           |         |        |        |               |         | 0.97   |        |
| Q9D6K8     | 67391      | Fundc2    | 1.32                      |         | 1.26   | 0.89   | 0.99          |         | 0.94   | 0.89   |
| P56959     | 233908     | Fus       | 1.03                      | 1.00    | 1.03   | 1.13   | 1.12          | 1.00    | 0.91   | 0.99   |
| Q9D164     | 59095      | Fxyd6     | 1.64                      | 1.22    | 1.02   | 1.62   | 1.10          | 1.05    | 1.62   | 1.06   |
| P97379     | 23881      | G3bp2     | 1.24                      | 0.94    | 0.98   |        | 1.11          | 0.95    |        | 1.05   |
| Q00612     | 14381      | G6Pd      |                           |         | 0.90   | 0.66   |               |         | 1.07   |        |
| Q9DCD6     | 56486      | Gabarap   |                           | 1.08    |        |        |               | 0.91    |        | 0.92   |
| Q8R3R8     | 57436      | Gabarapl1 |                           | 0.94    |        | 0.96   |               | 1.71    |        | 1.00   |
| P60521     | 93739      | Gabarapl2 | 1.03                      | 1.10    | 0.86   | 1.10   | 1.02          | 0.95    |        | 0.93   |
| P48318     | 14415      | Gad1      | 1.01                      | 1.00    |        |        | 0.88          | 0.91    | 1.01   | 1.12   |
| P48320     | 14417      | Gad2      |                           | 1.09    |        |        |               | 0.72    |        | 0.84   |
| Q99KY4     | 231580     | Gak       |                           | 0.99    | 0.83   |        |               | 0.81    |        | 0.86   |
| Q9R0N0     | 14635      | Galk1     |                           |         |        | 1.62   |               |         |        |        |
| Q8BHN3     | 14376      | Ganab     |                           | 0.99    | 1.02   | 0.90   |               | 0.92    | 0.83   |        |
| P06837     | 14432      | Gap43     | 1.43                      | 1.01    | 0.88   | 1.68   | 1.27          | 0.81    | 1.65   | 0.95   |
| P16858     | 100042025  | Gapdh/loc | 0.96                      | 0.97    | 0.95   | 0.96   | 0.69          | 0.95    | 1.00   | 0.96   |
| Q6PAR5     | 66691      | Gapvd1    |                           | 1.01    | 1.30   |        |               |         |        | 1.08   |
| Q9CZD3     | 353172     | Gars      | 1.03                      | 1.06    | 0.90   |        | 1.03          | 0.94    | 1.09   | 0.98   |
| Q60780     | 14457      | Gas7      | 0.82                      |         |        |        |               |         |        |        |
| O55126     | 14467      | Gbas      | 0.97                      | 1.01    | 0.83   | 0.91   | 1.03          | 0.92    | 1.19   | 1.02   |
| Q9D6Y9     | 74185      | Gbe1      |                           |         | 1.47   |        |               | 0.84    |        |        |
| Q60759     | 270076     | Gcdh      | 0.87                      |         |        |        |               |         |        |        |
| P97494     | 14629      | Gclc      |                           | 1.01    |        |        |               | 0.72    |        | 0.98   |
| Q9R111     | 14544      | Gda       | 1.09                      | 0.94    | 1.06   | 1.16   | 1.08          | 0.91    | 0.87   | 1.06   |
| O88741     | 14545      | Gdap1     | 0.92                      | 1.07    | 1.03   | 1.11   | 1.28          | 1.11    | 0.97   | 0.98   |
| Q8VE33     | 228858     | Gdap11    |                           |         |        |        |               |         | 1.09   |        |
| Q9JL56     | 56209      | Gde1      |                           |         |        |        |               |         |        | 1.12   |
| P50396     | 14567      | Gdi1      | 0.99                      | 1.03    | 0.96   | 0.94   | 0.99          | 0.92    | 0.98   | 1.01   |
| Q61598     | 14569      | Gdi2      | 1.01                      | 1.04    | 1.02   | 1.10   | 1.07          | 1.10    | 0.98   | 1.08   |
| Q9CRY7     | 66569      | Gdpd1     | 0.99                      |         |        |        | 0.45          | 0.88    |        |        |
| P03995     | 14580      | Gfap      | 1.14                      | 1.06    | 1.04   | 0.75   | 1.97          | 3.18    | 1.61   | 2.73   |
| P56213     | 11692      | Gfer      |                           |         | 1.20   |        |               | 1.42    |        | 0.88   |
| P47856     | 14583      | Gfpt1     |                           |         |        |        |               | 1.03    |        |        |
| Q8R0H9     | 106039     | Gga1      |                           |         | 0.89   |        |               |         |        |        |
| Q8BMI3     | 260302     | Gga3      |                           | 1.26    |        |        | 1.02          | 0.86    |        |        |

Supp. Table 1 (cont.)

| Uniprot_ID | Entrez_Gen | Symbol        | Developmental Myelination |         |        |        | Remyelination |         |        |        |
|------------|------------|---------------|---------------------------|---------|--------|--------|---------------|---------|--------|--------|
|            |            |               | Mut-w11                   | Mut-w12 | WT-w11 | WT-w12 | Mut-w11       | Mut-w12 | WT-w11 | WT-w12 |
| P06880     | 14599      | Gh1           |                           |         |        |        |               |         |        | 99.76  |
| Q68FF6     | 216963     | Git1          |                           |         |        | 1.04   |               |         | 1.03   |        |
| P23242     | 14609      | Gja1          | 0.87                      | 0.80    |        |        | 0.59          | 1.15    |        |        |
| Q64516     | 14933      | Gk            |                           | 0.87    | 1.11   |        | 0.98          |         | 1.37   |        |
| Q8K3I9     | 170772     | Glcci1        |                           |         |        |        | 0.80          |         |        |        |
| Q9CPU0     | 109801     | Glo1          | 0.97                      | 1.03    | 0.91   | 0.87   | 1.08          | 0.93    | 0.99   | 0.97   |
| Q9CPV4     | 67201      | Glod4         | 0.91                      | 1.02    | 0.87   | 0.88   | 1.19          | 0.89    | 0.81   | 0.95   |
| Q9QUH0     | 93692      | Glrx          | 0.97                      | 1.01    | 1.06   | 1.34   | 1.03          | 0.98    | 0.98   |        |
| Q9CQM9     | 30926      | Glrx3         | 1.20                      |         | 1.11   |        | 1.37          | 1.04    | 1.44   | 1.37   |
| Q80Y14     | 73046      | Glrx5         | 1.15                      | 1.15    | 0.93   | 0.83   | 0.92          | 0.96    |        | 0.95   |
| Q9JL62     | 56356      | Gltp          | 1.13                      | 0.89    | 0.81   | 0.98   | 0.58          | 0.84    | 1.04   | 0.80   |
| P26443     | 14661      | Glud1         | 0.84                      | 1.01    | 0.87   | 0.92   | 0.89          | 0.96    | 0.94   | 0.94   |
| P15105     | 14645      | Glul          | 1.13                      | 0.91    | 0.89   |        | 0.98          | 0.78    | 0.87   | 0.84   |
| P47963     | 270106 10  | Gm10071/Rpl13 |                           |         | 1.44   | 1.00   |               | 1.23    | 0.97   | 1.15   |
| Q80SZ7     | 100043507  | Gm15776/Gng5  |                           | 0.91    | 0.94   |        |               | 0.96    |        | 0.92   |
| Q9CQI3     | 63985      | Gmfb          | 1.08                      | 0.91    | 0.99   | 1.31   | 0.84          | 0.93    | 1.02   | 0.95   |
| Q9DCZ1     | 66355      | Gmpr          | 1.05                      | 0.97    | 0.99   | 1.04   |               |         | 0.99   | 1.01   |
| Q3THK7     | 229363     | Gmps          | 0.91                      | 1.33    | 1.09   |        | 0.96          | 0.92    | 1.27   | 1.02   |
| P21278     | 14672      | Gna11         | 0.88                      | 1.04    | 1.01   |        | 0.99          | 1.06    | 0.91   | 1.11   |
| P30677     | 14675      | Gna14         |                           | 0.92    |        |        |               |         |        | 0.92   |
| P08752     | 14678      | Gnai2         | 1.07                      | 1.08    | 1.04   | 1.09   | 1.00          | 1.00    | 1.29   | 1.01   |
| Q8CGK7     | 14680      | Gnal          | 1.14                      | 1.01    | 1.25   |        | 0.94          |         |        | 1.03   |
| P18872     | 14681      | Gnao1         | 1.03                      | 0.98    | 1.03   | 1.10   | 1.07          | 1.00    | 0.97   | 1.01   |
| P21279     | 14682      | Gnaq          | 0.97                      | 0.96    | 0.99   | 1.00   | 0.89          | 0.96    | 1.09   | 0.96   |
| Q6R0H7     | 14683      | Gnas          | 0.89                      | 1.10    |        |        | 1.12          | 1.04    |        |        |
| O70443     | 14687      | Gnaz          | 0.87                      | 1.00    | 1.37   |        | 1.02          | 1.11    | 0.97   | 0.95   |
| P62874     | 14688      | Gnb1          | 0.90                      | 0.99    | 1.05   | 1.01   | 0.78          | 0.92    | 0.95   | 0.99   |
| P68040     | 14694      | Gnb2l1        | 1.64                      | 1.08    | 1.04   | 1.18   | 1.04          | 1.01    |        | 1.02   |
| P62881     | 14697      | Gnb5          | 0.98                      | 0.86    | 1.04   |        | 1.07          | 1.07    | 1.11   | 1.11   |
| Q9DAS9     | 14701      | Gng12         | 0.90                      | 1.48    | 0.92   |        |               | 0.94    | 0.95   |        |
| P63213     | 14702      | Gng2          | 0.87                      | 0.94    | 0.93   | 1.31   | 1.26          | 0.92    | 0.71   | 1.17   |
| P63216     | 14704      | Gng3          | 1.04                      | 0.96    | 1.03   | 1.04   | 0.90          | 1.00    | 0.88   | 0.96   |
| P50153     | 14706      | Gng4          |                           | 1.29    | 1.10   |        |               | 0.68    |        | 1.76   |
| Q61016     | 14708      | Gng7          | 0.99                      | 0.91    | 0.98   |        |               | 0.87    | 0.90   | 1.12   |
| P36916     | 14670      | Gnl1          |                           |         |        |        |               |         |        | 0.95   |
| Q91W53     | 57437      | Golga7        |                           | 0.90    | 1.30   |        |               | 0.89    |        | 0.94   |
| P05201     | 14718      | Got1          | 0.94                      | 0.96    | 0.93   | 0.91   | 1.06          | 0.97    | 0.91   | 0.95   |
| P05202     | 14719      | Got2          | 0.97                      | 0.99    | 0.97   | 0.97   | 1.05          | 1.03    | 1.03   | 0.98   |
| P13707     | 14555      | Gpd1          | 1.12                      | 0.92    | 0.97   | 0.95   |               | 1.14    | 1.26   | 1.13   |
| Q3ULJ0     | 333433     | Gpd1l         | 1.18                      | 1.05    | 1.03   | 0.99   |               | 0.97    | 0.98   | 1.02   |
| Q64521     | 14571      | Gpd2          | 1.00                      | 1.05    | 1.03   | 1.04   | 1.01          | 1.02    | 0.90   | 1.01   |
| Q8BUV3     | 268566     | Gphn          | 0.82                      | 0.88    | 0.93   | 1.10   |               | 0.99    | 1.15   | 0.98   |
| P06745     | 14751      | Gpi           | 0.92                      | 0.98    | 0.96   | 0.90   | 1.06          | 0.93    | 0.99   | 0.98   |
| P35802     | 234267     | Gpm6a         | 0.97                      | 0.95    | 1.09   | 1.01   | 0.91          | 0.99    | 0.81   | 0.93   |
| P35803     | 14758      | Gpm6b         | 1.00                      | 0.99    | 1.19   | 1.00   | 1.06          | 1.05    | 0.80   | 1.04   |
| Q8C419     | 241263     | Gpr158        | 2.25                      | 1.69    | 1.39   | 1.49   | 1.82          | 1.57    | 1.92   | 1.25   |

Supp. Table 1 (cont.)

| Uniprot_ID | Entrez_Gen | Symbol  | Developmental Myelination |         |        |        | Remyelination |         |        |        |
|------------|------------|---------|---------------------------|---------|--------|--------|---------------|---------|--------|--------|
|            |            |         | Mut-w11                   | Mut-w12 | WT-w11 | WT-w12 | Mut-w11       | Mut-w12 | WT-w11 | WT-w12 |
| Q3UNH4     | 26913      | Gprin1  | 4.04                      | 1.11    | 1.23   | 3.52   | 2.45          | 0.84    | 2.44   | 1.01   |
| O70325     | 625249     | Gpx4    |                           | 0.85    | 1.16   | 0.84   | 0.86          | 0.90    | 0.99   | 1.14   |
| Q60631     | 14784      | Grb2    | 1.10                      | 0.97    | 1.01   | 1.06   | 1.02          | 0.98    | 1.20   | 0.91   |
| Q91Z53     | 76238      | Grhpr   | 0.88                      | 0.99    | 1.20   | 0.87   |               |         | 0.81   | 0.99   |
| P23818     | 14799      | Gria1   |                           | 1.21    |        |        |               | 1.31    |        |        |
| P23819     | 14800      | Gria2   | 1.25                      | 1.15    | 1.42   | 1.25   | 1.14          | 1.31    | 1.01   | 1.23   |
| Q9Z2W9     | 53623      | Gria3   |                           | 1.11    | 1.33   |        |               |         |        | 1.51   |
| Q01097     | 14812      | Grin2b  |                           |         | 1.25   |        |               |         |        |        |
| Q8VD04     | 54645      | Gripap1 |                           | 0.88    |        |        |               | 1.10    |        | 0.93   |
| Q9QYS2     | 108069     | Grm3    | 1.11                      | 1.01    | 1.33   | 1.12   | 0.91          | 1.25    | 0.95   | 1.13   |
| Q99LP6     | 17713      | Grpel1  |                           | 1.04    | 1.05   |        |               | 0.97    |        | 0.91   |
| Q9WV60     | 56637      | Gsk3b   | 1.25                      | 1.47    | 1.02   |        | 0.94          |         | 0.92   | 1.10   |
| P13020     | 227753     | Gsn     | 0.90                      | 0.94    | 0.94   |        | 0.94          | 1.06    | 1.00   | 0.97   |
| Q8R050     | 14852      | Gspt1   | 1.07                      | 1.11    | 0.89   |        | 0.92          | 0.86    |        | 0.99   |
| P24472     | 14860      | Gsta4   | 0.95                      | 1.01    | 0.86   | 0.79   | 0.87          | 0.89    | 0.83   | 0.82   |
| Q9DCM2     | 76263      | Gstk1   | 1.05                      | 1.07    | 0.99   |        | 0.89          | 0.98    | 1.30   | 0.95   |
| P48774     | 14866      | Gstm3   | 0.95                      | 0.95    | 0.93   | 0.91   | 0.73          | 0.81    | 0.89   | 0.84   |
| P10649     | 14862      | Gstm5   | 0.92                      | 0.95    | 0.91   | 0.98   | 0.83          | 0.90    | 0.99   | 0.92   |
| O09131     | 14873      | Gsto1   |                           | 0.97    |        |        |               | 0.86    |        |        |
| P19157     | 100042625  | Gstp1   | 0.99                      | 0.99    | 0.87   | 0.87   | 0.78          | 0.87    | 0.87   | 0.85   |
| Q9WVL0     | 14874      | Gstz1   | 1.14                      | 1.05    | 0.84   |        | 1.04          | 1.14    | 1.02   | 0.93   |
| Q8K284     | 233863     | Gtf3c1  |                           |         |        |        |               |         |        | 0.83   |
| O08582     | 14904      | Gtppb1  |                           |         | 0.94   |        |               |         |        |        |
| O54865     | 54195      | Gucy1b3 | 0.97                      | 1.37    | 1.00   | 1.18   | 0.74          | 1.29    | 0.94   | 0.98   |
| Q64520     | 14923      | Guk1    | 1.09                      | 0.96    | 0.98   | 1.00   | 1.06          | 1.00    | 1.08   | 1.00   |
| P10922     | 14958      | H1f0    | 18.53                     | 1.39    | 1.43   |        |               | 2.35    | 19.62  | 1.24   |
| Q8R1M2     | 232440     | H2afj   | 1.56                      | 1.08    | 1.24   | 1.38   | 1.10          | 2.12    | 2.22   | 0.99   |
| P27661     | 15270      | H2afx   |                           |         |        |        |               |         | 2.57   |        |
| P0C0S6     | 51788      | H2afz   |                           | 1.20    |        | 1.12   |               |         |        | 0.98   |
| Q61425     | 15107      | Hadh    | 0.86                      | 0.92    | 1.02   |        | 1.20          | 0.84    | 0.90   | 0.91   |
| Q8BMS1     | 97212      | Hadha   | 0.97                      | 1.01    | 0.89   | 0.90   | 0.95          | 1.03    | 0.95   | 0.94   |
| Q99JY0     | 231086     | Hadhb   | 0.89                      | 0.95    | 0.86   | 1.15   |               | 1.03    | 0.92   |        |
| Q99KB8     | 14651      | Hagh    | 0.86                      | 0.98    | 0.99   | 1.00   | 1.25          | 0.94    | 0.89   | 1.19   |
| Q35668     | 15114      | Hap1    |                           | 1.18    | 0.30   |        |               |         | 2.38   | 0.75   |
| Q9QUP5     | 12950      | Hapln1  |                           | 0.89    | 0.98   |        |               | 0.93    |        | 0.86   |
| Q61035     | 15115      | Hars    |                           |         |        | 0.93   |               |         | 1.09   |        |
| Q9D1L9     | 68576      | Hbxip   |                           | 0.92    | 1.13   |        |               | 1.15    |        | 0.64   |
| O88704     | 15165      | Hcn1    |                           | 1.08    | 0.93   |        |               |         |        |        |
| O88703     | 15166      | Hcn2    |                           |         |        |        |               |         | 0.93   |        |
| P70288     | 15182      | Hdac2   |                           |         |        |        |               | 1.29    |        | 1.12   |
| Q9D114     | 68695      | Hddc3   |                           |         |        |        |               | 14.14   |        |        |
| P51859     | 15191      | Hdgf    | 0.97                      | 1.36    | 1.15   |        |               | 1.07    | 1.07   | 1.01   |
| Q9JMG7     | 29877      | Hdgfrp3 |                           |         | 1.02   |        |               | 1.08    |        | 1.06   |
| Q3UGR5     | 76987      | Hdhd2   | 0.98                      | 0.94    | 0.90   | 0.87   | 1.11          | 0.92    | 0.98   | 0.98   |
| Q9CYW4     | 72748      | Hdhd3   |                           | 1.28    |        |        |               | 0.72    |        |        |
| Q8VDJ3     | 110611     | Hdlbp   | 1.20                      |         |        |        |               |         |        |        |

Supp. Table 1 (cont.)

| Uniprot_ID | Entrez_Gen | Symbol    | Developmental Myelination |         |        |        | Remyelination |         |        |        |
|------------|------------|-----------|---------------------------|---------|--------|--------|---------------|---------|--------|--------|
|            |            |           | Mut-w11                   | Mut-w12 | WT-w11 | WT-w12 | Mut-w11       | Mut-w12 | WT-w11 | WT-w12 |
| Q9R257     | 15199      | Hebp1     | 1.27                      | 4.20    | 4.27   |        | 2.49          | 2.77    | 3.74   | 2.88   |
| Q69ZR2     | 207304     | Hectd1    |                           | 0.96    | 1.61   | 0.77   |               | 0.83    |        | 1.02   |
| Q640R3     | 72927      | Hepacam   | 1.57                      | 1.33    | 0.84   | 1.03   | 2.09          | 1.07    | 1.50   | 0.95   |
| Q99LI8     | 15239      | Hgs       |                           | 0.85    | 1.12   |        |               | 1.03    |        | 1.06   |
| Q99L13     | 58875      | Hibadh    | 0.82                      | 1.17    | 0.93   | 0.91   | 1.25          | 0.98    | 0.89   | 0.95   |
| Q8QZS1     | 227095     | Hibch     | 0.96                      | 1.03    | 0.90   | 0.90   | 0.74          | 0.94    | 1.12   | 0.92   |
| P70349     | 15254      | Hint1     | 1.02                      | 1.03    | 0.92   | 1.02   | 1.03          | 0.97    | 0.88   | 0.95   |
| Q9D0S9     | 68917      | Hint2     | 1.21                      | 1.13    | 0.81   |        | 1.15          | 0.95    | 1.22   | 0.91   |
| Q9CPS6     | 66847      | Hint3     | 1.30                      | 0.87    | 0.77   | 1.10   |               | 0.89    | 1.28   | 0.77   |
| Q9JKY5     | 29816      | Hip1r     | 1.21                      | 1.05    | 1.20   | 1.94   | 1.04          | 0.97    | 1.02   | 1.02   |
| P15864     | 50708      | Hist1h1c  |                           | 1.10    | 1.67   | 0.70   |               | 2.56    | 2.53   | 1.18   |
| P43274     | 50709      | Hist1h1e  |                           | 1.06    | 1.68   |        |               | 2.95    |        | 1.19   |
| P17710     | 15275      | Hk1       | 0.95                      | 0.96    | 0.94   | 0.78   | 1.02          | 0.95    | 1.07   | 0.99   |
| P63158     | 15289      | Hmgb1     | 1.10                      | 1.01    | 1.01   | 0.87   | 2.03          | 0.95    | 0.89   | 1.03   |
| O70252     | 15369      | Hmox2     |                           | 0.90    | 0.97   |        |               | 0.98    |        | 0.92   |
| P49312     | 15382      | Hnrnpa1   | 1.14                      | 0.97    | 1.05   | 0.92   | 0.99          | 1.02    | 0.98   | 1.07   |
| O88569     | 53379      | Hnrnpa2b1 | 0.92                      | 0.97    | 0.97   | 1.01   | 1.02          | 1.02    | 0.85   | 1.08   |
| Q8BG05     | 229279     | Hnrnpa3   | 0.96                      | 1.04    | 0.98   | 1.11   | 0.75          | 1.06    | 1.13   | 1.07   |
| Q99020     | 15384      | Hnrnpab   | 1.28                      | 1.12    | 1.02   | 0.93   |               | 1.09    | 1.29   | 1.08   |
| Q9Z204     | 15381      | Hnrnpc    | 0.89                      | 0.95    | 1.12   | 1.18   | 0.94          | 1.16    | 0.94   | 0.97   |
| Q60668     | 11991      | Hnrnpd    | 0.99                      | 1.01    | 0.97   |        | 1.09          | 0.99    | 1.46   | 1.04   |
| O35737     | 59013      | Hnrnph1   | 1.16                      |         | 1.01   | 1.33   | 0.97          | 1.00    | 0.92   | 1.11   |
| P61979     | 15387      | Hnrnpk    | 1.17                      | 1.05    | 1.05   | 1.08   | 1.03          | 1.02    | 1.03   | 1.11   |
| Q8R081     | 15388      | Hnrnpl    | 1.18                      | 0.96    | 1.00   | 1.37   | 1.16          | 0.97    | 1.11   | 1.04   |
| Q9D0E1     | 76936      | Hnrnpm    | 1.07                      | 0.93    | 1.27   |        | 1.03          | 1.07    | 1.54   | 1.13   |
| Q8VEK3     | 51810      | Hnrnpu    | 1.97                      | 1.04    | 0.97   | 1.77   | 1.65          | 0.99    | 1.68   | 1.00   |
| Q00PI9     | 68693      | Hnrnpul2  |                           | 1.12    | 0.93   |        | 0.14          | 1.01    |        | 1.05   |
| Q921F4     | 72692      | Hnrpll    | 1.63                      | 1.09    | 1.01   | 1.62   | 1.28          | 1.15    | 1.08   | 1.21   |
| Q9Z2Y3     | 26556      | Homer1    | 1.46                      | 1.90    | 1.29   |        | 1.12          | 1.15    | 1.04   | 1.39   |
| Q3TEA8     | 15441      | Hp1bp3    | 2.80                      | 1.08    | 1.20   |        |               | 1.01    |        | 1.06   |
| P84075     | 15444      | Hpca      | 1.09                      | 0.92    | 1.03   | 0.93   | 1.02          | 1.08    | 0.89   | 1.04   |
| P62748     | 53602      | Hpcal1    | 1.06                      | 1.03    | 0.87   | 1.03   | 1.05          | 0.71    |        | 0.83   |
| Q8BGZ1     | 170638     | Hpcal4    | 1.34                      | 1.11    | 1.31   | 1.36   | 1.24          | 1.12    | 1.02   | 1.13   |
| P00493     | 15452      | Hprt1     | 1.06                      | 1.00    | 0.82   | 1.32   | 0.99          | 0.91    | 1.21   | 0.91   |
| Q61411     | 15461      | Hras      | 1.08                      | 1.04    | 1.03   | 1.08   | 0.94          | 0.98    | 1.04   | 0.99   |
| P52760     | 15473      | Hrsp12    | 0.90                      | 0.86    | 1.19   | 0.91   | 1.02          | 1.21    | 1.08   |        |
| O08756     | 15108      | Hsd17b10  | 1.04                      | 0.98    | 1.22   |        | 0.95          | 1.05    | 1.00   | 1.04   |
| O70503     | 56348      | Hsd17b12  | 1.02                      | 1.09    | 1.34   | 1.20   | 1.10          | 1.20    | 1.19   | 1.03   |
| Q8BTX9     | 72552      | Hsd1      | 0.96                      |         | 0.82   |        |               |         |        | 0.89   |
| P07901     | 15519      | Hsp90aa1  | 1.03                      | 1.01    | 0.98   | 1.08   | 1.00          | 0.97    | 1.02   | 0.96   |
| P11499     | 15516      | Hsp90ab1  | 1.01                      | 0.96    | 0.98   | 1.03   | 0.99          | 0.98    | 0.97   | 0.97   |
| P08113     | 22027      | Hsp90b1   | 0.92                      | 1.02    | 0.95   | 0.96   | 0.94          | 0.97    | 0.99   | 1.01   |
| Q8K0U4     | 73442      | Hspa12a   | 1.01                      | 0.96    | 0.95   | 1.15   | 0.88          | 1.01    | 1.02   | 0.99   |
| Q9CZJ2     | 72630      | Hspa12b   | 1.05                      | 0.98    |        | 0.98   | 0.82          | 0.97    |        | 1.11   |
| P17879     | 193740 154 | Hspa1a/Hs | 0.72                      | 0.98    |        | 1.08   | 0.77          | 0.80    |        | 0.74   |
| P17156     | 15512      | Hspa2     | 0.97                      | 0.99    | 1.00   | 1.25   | 0.85          | 0.85    | 1.14   | 1.06   |

Supp. Table 1 (cont.)

| Uniprot_ID | Entrez_Gen | Symbol   | Developmental Myelination |         |        |        | Remyelination |         |        |        |
|------------|------------|----------|---------------------------|---------|--------|--------|---------------|---------|--------|--------|
|            |            |          | Mut-w11                   | Mut-w12 | WT-w11 | WT-w12 | Mut-w11       | Mut-w12 | WT-w11 | WT-w12 |
| Q61316     | 15525      | Hspa4    | 1.93                      | 1.03    | 0.91   | 1.78   | 2.29          | 0.98    | 1.70   | 0.96   |
| P48722     | 18415      | Hspa4l   | 0.90                      | 1.02    | 0.87   | 0.89   | 0.98          | 1.01    | 0.95   | 0.89   |
| P20029     | 14828      | Hspa5    | 1.01                      | 1.03    | 1.00   | 0.97   | 1.10          | 1.02    | 1.00   | 1.03   |
| P63017     | 15481      | Hspa8    | 0.92                      | 0.99    | 0.98   | 0.96   | 0.98          | 0.97    | 0.94   | 0.98   |
| P38647     | 15526      | Hspa9    | 1.00                      | 1.02    | 0.94   | 1.03   | 0.98          | 1.01    | 1.01   | 0.99   |
| P14602     | 15507      | Hspb1    |                           |         | 0.94   |        | 1.07          |         |        |        |
| P63038     | 15510      | Hspd1    | 0.94                      | 1.03    | 0.96   | 0.86   | 0.95          | 0.95    | 1.02   | 0.95   |
| Q64433     | 15528      | Hspe1    | 0.90                      | 1.02    | 0.96   | 0.94   | 1.12          | 0.95    | 0.95   | 0.93   |
| Q61699     | 15505      | Hsph1    | 1.42                      | 1.04    | 0.99   | 1.39   | 1.28          | 1.04    | 1.26   | 0.95   |
| P42859     | 15194      | Htt      | 1.51                      | 1.10    | 0.97   | 1.76   |               | 1.34    | 1.14   | 1.18   |
| Q7TMY8     | 59026      | Huwe1    |                           | 1.22    | 1.09   | 1.40   |               | 1.11    |        | 0.95   |
| Q9JKR6     | 12282      | Hyou1    | 1.14                      | 0.98    | 0.92   | 1.12   | 1.37          | 0.98    | 1.37   | 0.97   |
| Q8BU30     | 105148     | lars     | 1.97                      | 1.33    |        | 1.44   | 0.72          |         |        |        |
| Q8BIJ6     | 381314     | lars2    | 0.92                      | 1.05    | 0.98   | 0.98   | 0.79          | 1.08    | 0.92   | 0.98   |
| Q60625     | 15898      | lcam5    |                           | 1.02    | 1.24   |        | 0.90          |         | 0.70   | 0.94   |
| Q88844     | 15926      | ldh1     | 1.10                      | 0.95    | 0.97   | 1.19   | 0.88          | 1.00    | 0.98   | 1.01   |
| P54071     | 269951     | ldh2     | 0.88                      | 1.01    | 0.94   |        | 1.09          | 0.92    | 1.35   | 0.91   |
| Q9D6R2     | 67834      | ldh3a    | 0.98                      | 1.03    | 0.98   | 0.63   | 0.42          | 0.96    | 1.11   | 0.98   |
| P70404     | 15929      | ldh3g    | 0.93                      | 1.05    | 1.00   | 0.99   | 1.16          | 1.04    | 1.03   | 1.00   |
| P58044     | 319554     | ldi1     | 0.81                      | 0.83    |        |        | 0.98          | 0.72    |        |        |
| Q8R366     | 140559     | lgsf8    |                           | 0.79    | 0.80   |        |               | 0.80    |        | 0.81   |
| Q8CAQ8     | 76614      | lmmt     | 1.13                      | 0.97    | 0.99   | 0.95   | 1.04          | 1.11    | 1.28   | 1.00   |
| Q55023     | 55980      | lmpa1    | 0.97                      | 0.94    | 0.93   | 0.91   | 1.04          | 0.94    | 0.85   | 0.91   |
| P46660     | 226180     | lna      | 1.04                      | 0.86    | 0.80   | 0.60   | 0.67          | 1.09    | 1.05   | 1.09   |
| P49442     | 16329      | lnpp1    |                           | 1.77    | 0.96   |        |               |         |        | 1.10   |
| Q9EPW0     | 269180     | lnpp4a   | 1.25                      | 0.96    | 0.97   |        |               | 0.98    |        | 1.06   |
| Q8BKC5     | 70572      | lpo5     | 0.95                      | 0.92    | 0.96   | 1.03   | 0.98          | 0.99    | 1.02   | 1.09   |
| Q9EPL8     | 233726     | lpo7     | 1.34                      | 1.02    | 1.13   | 1.06   | 1.17          | 1.03    | 1.10   | 1.09   |
| Q91YE6     | 226432     | lpo9     |                           | 1.04    | 1.62   | 1.18   | 3.35          | 0.99    |        |        |
| Q8R0S2     | 232227     | lqsec1   | 1.21                      | 0.95    | 0.97   | 1.32   | 1.26          | 1.03    | 1.04   | 1.25   |
| Q5DU25     | 245666     | lqsec2   |                           | 0.83    | 0.96   |        |               |         |        | 1.00   |
| Q8VIM9     | 210146     | lrgg     |                           |         |        |        | 0.84          | 1.21    |        |        |
| Q9D924     | 69046      | lsca1    |                           | 1.03    | 0.83   | 1.26   | 1.11          | 0.99    | 1.22   | 0.93   |
| Q9DCB8     | 74316      | lsca2    |                           |         | 0.93   | 1.44   |               | 1.01    |        |        |
| Q91V64     | 66307      | lsoc1    | 0.89                      |         | 0.88   |        | 1.14          | 1.02    | 0.91   | 0.94   |
| P85094     | 664994     | lsoc2    | 0.93                      | 1.03    | 0.86   |        | 0.93          | 1.01    | 1.09   | 0.95   |
| Q9D892     | 16434      | ltpa     | 0.90                      | 0.93    | 1.03   | 1.15   | 1.52          | 0.94    | 1.08   | 0.92   |
| P11881     | 16438      | ltpr1    | 1.31                      | 1.12    | 1.28   | 1.22   | 0.87          | 1.37    | 1.02   | 1.10   |
| Q9Z0R4     | 16443      | ltsn1    | 1.68                      | 0.98    | 0.93   | 1.83   |               | 0.83    | 1.69   | 1.04   |
| Q99MN1     | 85305      | Kars     | 0.85                      | 0.78    | 0.97   | 1.30   | 1.23          | 1.12    | 1.11   | 0.90   |
| Q8BNW9     | 74901      | Kbtbd11  | 1.16                      |         |        | 1.15   | 1.20          |         | 1.22   |        |
| P62482     | 16498      | Kcnab2   | 0.93                      | 0.94    | 0.94   | 0.97   | 0.91          | 1.13    | 0.94   | 0.93   |
| Q9JM63     | 16513      | Kcnj10   |                           |         |        |        |               | 1.34    | 2.42   |        |
| Q60749     | 20218      | Khdrbs1  |                           | 0.89    | 1.01   |        |               | 1.62    |        | 0.97   |
| Q3U0V1     | 16549      | Khsrp    | 1.20                      | 0.90    | 1.06   |        |               | 1.07    | 1.21   | 1.06   |
| Q80U49     | 217882     | Kiaa0284 |                           |         | 1.17   | 1.54   |               |         | 1.39   | 1.87   |



Supp. Table 1 (cont.)

| Uniprot_ID | Entrez_Gen | Symbol    | Developmental Myelination |         |        |        | Remyelination |         |        |        |
|------------|------------|-----------|---------------------------|---------|--------|--------|---------------|---------|--------|--------|
|            |            |           | Mut-w11                   | Mut-w12 | WT-w11 | WT-w12 | Mut-w11       | Mut-w12 | WT-w11 | WT-w12 |
| Q6PDI5     | 230249     | Kiaa0368  | 1.40                      | 0.97    | 0.91   | 1.22   |               | 0.93    | 1.42   | 1.10   |
| Q8R0A7     | 234797     | Kiaa0513  | 0.88                      |         |        |        |               | 0.75    | 1.32   |        |
| Q80TL4     | 230085     | Kiaa1045  |                           | 3.48    | 1.03   |        |               |         | 1.06   |        |
| Q9DBN4     | 97820      | Kiaa1191  |                           |         |        |        |               |         |        | 0.84   |
| A2AQ25     | 208618     | Kiaa1217  | 1.73                      | 1.19    | 1.00   |        | 1.23          | 1.18    | 1.39   | 1.33   |
| Q3UGY8     | 215821     | Kiaa1244  | 2.01                      | 0.95    | 1.22   | 1.52   |               |         |        | 1.21   |
| Q6ZPU9     | 72320      | Kiaa1279  |                           | 1.06    |        |        |               |         |        |        |
| Q148V7     | 227446     | Kiaa1468  | 1.40                      | 1.17    | 1.05   | 1.00   | 0.64          | 0.85    | 0.96   | 0.97   |
| Q7TQ95     | 69605      | Kiaa1715  |                           |         |        |        |               |         | 3.05   |        |
| Q8VDP4     | 219158     | Kiaa1967  |                           | 1.42    | 0.98   | 1.95   |               | 1.16    | 2.16   | 0.93   |
| P33173     | 16560      | Kif1a     | 1.79                      | 1.11    | 0.97   | 1.11   |               | 1.07    | 1.02   | 1.04   |
| Q9QXL2     | 16564      | Kif21a    | 1.32                      | 0.98    | 0.97   | 1.08   | 1.23          | 1.09    | 1.03   | 0.98   |
| P28740     | 16563      | Kif2a     |                           | 1.04    |        |        |               | 1.19    |        | 1.18   |
| P28741     | 16568      | Kif3a     | 1.78                      |         |        |        | 1.93          |         |        |        |
| Q61768     | 16573      | Kif5b     | 1.36                      | 1.07    | 0.93   | 0.97   | 0.83          | 0.94    | 1.54   | 0.78   |
| P28738     | 16574      | Kif5c     | 1.01                      | 0.98    | 0.84   | 0.98   | 0.90          | 0.97    | 0.96   | 0.94   |
| O88447     | 16593      | Klc1      |                           | 0.99    | 0.87   | 1.96   | 1.29          | 0.91    |        | 1.15   |
| O88448     | 16594      | Klc2      |                           |         |        |        |               | 0.49    |        |        |
| Q60960     | 16646      | Kpna1     |                           |         |        |        |               | 1.26    |        |        |
| O35343     | 16649      | Kpna4     |                           |         | 0.98   |        |               |         |        |        |
| P70168     | 16211      | Kpnb1     | 0.96                      | 1.11    | 0.98   | 0.97   | 1.09          | 0.94    | 1.00   | 1.07   |
| Q61781     | 16664      | Krt14     |                           | 0.98    | 0.97   |        |               | 0.95    |        | 0.81   |
| Q3UV17     | 77055      | Krt76     | 14.01                     | 26.17   | 8.87   |        | 11.32         | 25.51   |        | 18.32  |
| Q61595     | 16709      | Ktn1      | 1.15                      | 1.51    | 1.08   | 1.67   | 1.12          | 1.02    | 1.38   | 1.09   |
| P11627     | 16728      | L1cam     | 0.96                      | 1.03    | 1.08   | 0.87   | 1.65          | 0.95    | 1.07   | 1.04   |
| Q9EP89     | 80907      | Lactb     |                           |         |        | 1.08   |               |         | 1.10   |        |
| P19137     | 16772      | Lama1     | 0.99                      | 1.03    | 1.04   | 0.95   | 1.48          | 1.05    | 0.86   |        |
| Q9CQ22     | 66508      | Lamtor1   |                           |         |        |        | 1.01          |         |        |        |
| O88653     | 56692      | Lamtor3   | 1.26                      | 1.07    |        |        |               | 1.01    | 1.23   |        |
| O89112     | 14768      | Lancl1    | 1.24                      | 0.97    | 1.10   |        |               | 1.15    |        | 1.09   |
| Q9JJK2     | 71835      | Lancl2    | 1.15                      | 0.95    | 1.19   | 1.22   | 1.19          | 1.20    | 1.07   | 1.11   |
| Q9CPY7     | 66988      | Lap3      | 0.85                      |         |        | 0.64   |               |         | 0.97   |        |
| Q8BMJ2     | 107045     | Lars      | 0.28                      | 0.80    | 1.07   | 1.28   | 0.81          | 0.83    |        | 0.79   |
| Q61792     | 16796      | Lasp1     | 1.84                      | 1.03    | 1.15   | 0.21   | 0.57          | 1.08    | 1.83   | 1.04   |
| Q61233     | 18826      | Lcp1      |                           |         |        |        | 1.84          |         |        |        |
| P06151     | 16828      | Ldha      | 1.09                      | 1.01    | 1.10   | 1.06   | 0.89          | 1.01    | 0.95   | 1.04   |
| P16125     | 16832      | Ldhb      | 0.99                      | 0.95    | 0.95   | 0.99   | 0.88          | 0.96    | 1.04   | 0.96   |
| Q9Z2I0     | 56384      | Letm1     | 1.04                      | 1.07    | 1.00   | 0.92   | 1.22          | 1.05    | 1.05   | 0.97   |
| P16045     | 16852      | Lgals1    |                           | 1.04    | 1.91   |        |               | 0.99    | 0.80   | 1.22   |
| Q8VED9     | 216551     | Lgalsl    | 1.25                      | 0.93    | 0.93   | 0.92   | 1.60          | 0.97    | 0.93   | 0.91   |
| Q9JIA1     | 56839      | Lgi1      | 0.87                      | 0.95    | 1.05   |        | 0.82          | 1.14    |        | 1.11   |
| O89017     | 19141      | Lgmn      | 0.87                      |         |        |        |               |         |        |        |
| Q9D7I5     | 76429      | Lhpp      | 1.05                      |         |        |        |               |         | 0.82   |        |
| Q8JZS0     | 108030     | Lin7a     | 1.17                      | 1.05    | 1.13   |        | 1.00          | 1.09    |        | 1.12   |
| O88952     | 22343      | Lin7c     |                           | 1.07    | 0.92   |        |               | 1.15    |        | 1.00   |
| Q8BT35     | 67885      | Linc00116 |                           |         | 1.20   |        |               | 1.41    |        |        |

Supp. Table 1 (cont.)

| Uniprot_ID | Entrez_Gen | Symbol   | Developmental Myelination |         |        |        | Remyelination |         |        |        |
|------------|------------|----------|---------------------------|---------|--------|--------|---------------|---------|--------|--------|
|            |            |          | Mut-w11                   | Mut-w12 | WT-w11 | WT-w12 | Mut-w11       | Mut-w12 | WT-w11 | WT-w12 |
| Q9D1T0     | 235402     | Lingo1   |                           | 1.01    |        |        |               |         | 1.66   |        |
| P48678     | 16905      | Lmna     | 1.13                      | 1.07    | 1.10   | 0.92   | 1.39          | 1.07    | 1.04   | 1.06   |
| P14733     | 16906      | Lmnb1    | 1.82                      | 1.08    | 1.09   | 1.54   | 1.45          | 1.02    | 0.82   | 1.23   |
| P21619     | 16907      | Lmnb2    | 1.27                      | 1.03    | 0.99   | 1.35   | 1.17          | 0.95    | 1.63   | 0.89   |
| Q8C129     | 240028     | Lnpep    | 1.07                      |         |        |        |               |         | 1.06   |        |
| Q8CGK3     | 74142      | Lonp1    | 1.18                      | 1.07    | 1.02   | 1.32   | 1.46          | 1.08    | 1.15   | 0.96   |
| Q80TR1     | 330814     | Lphn1    | 1.72                      |         | 1.19   |        | 0.85          |         |        | 0.97   |
| Q91ZX7     | 16971      | Lrp1     | 1.00                      | 1.00    | 1.06   | 0.89   | 1.01          | 1.13    | 0.94   | 1.04   |
| Q6PB66     | 72416      | Lrpprc   | 1.11                      | 1.01    | 0.87   | 1.02   | 0.98          | 0.98    | 1.21   | 1.00   |
| Q9D1G5     | 66606      | Lrrc57   | 1.46                      | 0.94    | 1.11   | 1.17   | 1.13          | 1.07    | 1.10   | 1.06   |
| Q922Q8     | 98238      | Lrrc59   |                           |         | 1.13   |        |               |         |        | 1.00   |
| Q8BLK3     | 268890     | Lsamp    | 0.91                      | 0.86    | 1.02   | 0.91   | 0.92          | 0.98    | 0.93   | 0.97   |
| P62313     | 78651      | Lsm6     |                           | 1.04    | 0.92   | 1.06   |               | 1.00    |        | 0.94   |
| P24527     | 16993      | Lta4h    | 0.98                      | 0.95    | 0.91   | 1.35   | 0.90          | 1.01    | 1.04   | 0.89   |
| P70202     | 17035      | Lxn      | 0.95                      | 1.00    | 1.05   | 0.89   | 0.79          | 1.16    | 0.89   | 1.07   |
| Q9WUC3     | 23934      | Ly6h     | 1.15                      |         | 1.17   |        |               | 1.03    | 0.88   | 1.21   |
| Q9WTL7     | 26394      | Lypla2   | 0.87                      | 1.24    | 1.02   | 1.15   |               | 1.02    |        | 1.01   |
| Q8K215     | 380840     | Lyrn4    |                           | 1.13    | 1.03   | 0.94   | 1.06          | 0.89    | 1.26   |        |
| Q9JHQ5     | 93730      | Lztf1l   |                           |         |        |        |               |         |        | 1.09   |
| Q9QXZ0     | 11426      | Macf1    | 1.25                      | 1.42    | 1.21   | 1.21   | 1.60          | 1.11    | 1.22   | 1.19   |
| Q3UYG8     | 72899      | MacroD2  | 1.97                      | 0.89    | 1.03   |        |               |         |        | 1.03   |
| Q80U28     | 228355     | Madd     | 2.16                      | 1.06    | 1.31   | 1.50   |               | 1.30    |        | 1.11   |
| P20917     | 17136      | Mag      | 0.86                      | 0.87    | 0.83   | 0.70   | 0.76          | 0.88    | 0.70   | 0.69   |
| Q6RHR9     | 14924      | Magi1    |                           |         |        |        |               |         | 1.44   |        |
| P61327     | 17149      | Magoh    |                           |         |        |        |               |         |        | 0.54   |
| Q8BW75     | 109731     | Maob     |                           | 1.11    | 0.78   | 1.11   |               |         | 1.21   | 1.35   |
| Q9QYR6     | 17754      | Map1a    | 2.09                      | 0.96    | 0.99   | 1.96   | 4.30          | 0.98    | 2.32   | 0.96   |
| P14873     | 17755      | Map1b    | 2.91                      | 1.01    | 0.97   | 4.02   | 0.71          | 1.02    | 3.84   | 0.98   |
| Q91VR7     | 66734      | Map1lc3a | 1.03                      | 1.01    | 0.98   | 1.29   | 0.89          | 0.89    | 0.89   | 0.91   |
| Q9CQV6     | 67443      | Map1lc3b | 0.95                      | 0.91    | 0.87   | 1.05   | 0.82          | 0.80    | 0.78   | 0.83   |
| Q8C052     | 270058     | Map1s    |                           | 1.03    | 1.02   |        |               |         | 1.01   | 1.12   |
| P20357     | 17756      | Map2     | 1.02                      | 1.03    | 0.94   | 0.91   | 1.25          | 1.00    | 0.84   | 0.97   |
| P31938     | 26395      | Map2K1   | 1.14                      | 1.00    | 0.98   | 1.22   | 1.08          | 0.97    | 0.96   | 0.98   |
| P47809     | 26398      | Map2k4   | 1.09                      | 0.99    | 1.42   |        | 0.77          | 0.78    |        | 1.05   |
| P27546     | 17758      | Map4     | 1.66                      | 1.03    | 1.09   |        | 1.09          | 1.08    | 1.72   | 0.95   |
| Q7TSJ2     | 17760      | Map6     | 1.38                      | 1.00    | 1.02   | 2.26   | 1.37          | 1.02    | 1.30   | 0.95   |
| A2AJI0     | 245877     | Map7d1   | 4.06                      | 0.89    | 0.74   |        | 3.22          | 0.89    |        | 0.97   |
| A2AG50     | 78283      | Map7d2   | 1.51                      | 0.74    | 0.64   | 0.86   | 0.84          |         | 1.26   | 0.79   |
| P63085     | 26413      | Mapk1    | 1.06                      | 0.99    | 0.97   | 1.01   | 1.10          | 0.94    | 0.99   | 0.99   |
| Q63844     | 26417      | Mapk3    | 1.12                      |         |        |        | 0.69          |         |        |        |
| Q61166     | 13589      | Mapre1   | 1.58                      | 1.07    | 1.00   | 1.51   | 1.92          | 0.97    | 1.61   | 1.04   |
| Q8R001     | 212307     | Mapre2   | 1.45                      | 0.95    | 0.96   |        | 1.15          | 1.01    | 1.33   | 0.88   |
| Q6PER3     | 100732     | Mapre3   | 1.47                      | 1.00    | 0.97   | 1.34   | 1.73          | 0.98    | 1.47   | 0.95   |
| P10637     | 17762      | Mapt     | 1.59                      | 0.78    | 0.99   | 2.00   | 1.13          | 0.93    | 1.69   | 0.87   |
| Q922Q1     | 67247      | March2   | 1.30                      | 1.21    | 1.38   | 1.22   | 1.14          | 1.43    | 1.63   | 1.41   |
| P26645     | 17118      | Marcks   | 1.70                      | 0.99    | 0.90   | 1.35   | 1.49          | 0.88    | 1.91   | 0.91   |

Supp. Table 1 (cont.)

| Uniprot_ID | Entrez_Gen | Symbol  | Developmental Myelination |         |        |        | Remyelination |         |        |        |
|------------|------------|---------|---------------------------|---------|--------|--------|---------------|---------|--------|--------|
|            |            |         | Mut-w11                   | Mut-w12 | WT-w11 | WT-w12 | Mut-w11       | Mut-w12 | WT-w11 | WT-w12 |
| P28667     | 17357      | Marcks1 |                           | 1.09    | 1.30   |        |               | 0.98    |        | 1.15   |
| Q8VHJ5     | 226778     | Mark1   |                           | 1.12    | 1.34   |        |               | 1.00    |        | 1.22   |
| Q03141     | 17169      | Mark3   |                           |         | 1.12   |        | 3.01          |         | 0.96   | 1.17   |
| Q99LB6     | 108645     | Mat2b   |                           |         |        | 1.15   |               |         | 1.01   |        |
| Q8K310     | 17184      | Matr3   | 1.32                      | 1.05    | 1.10   | 1.25   | 1.18          | 1.09    | 1.26   | 1.13   |
| P04370     | 17196      | Mbp     | 0.78                      | 0.73    | 0.69   | 0.71   | 0.47          | 0.77    | 0.82   | 0.62   |
| Q5HZI9     | 230125     | Mcart1  |                           |         | 1.39   |        |               |         |        | 0.84   |
| Q8R3F5     | 223722     | Mcat    |                           |         |        |        |               | 0.77    |        |        |
| Q9D1I5     | 73724      | Mcee    |                           | 0.91    |        |        |               | 0.97    |        |        |
| Q9DB27     | 68995      | Mcts1   | 0.88                      | 1.16    | 1.24   | 1.08   | 1.40          | 1.03    | 0.98   | 1.22   |
| Q3UMR5     | 215999     | Mcu     | 1.13                      |         |        |        | 0.69          | 1.54    | 0.87   |        |
| P14152     | 17449      | Mdh1    | 0.92                      | 0.95    | 0.95   | 0.88   | 1.02          | 0.90    | 0.91   | 0.94   |
| P08249     | 17448      | Mdh2    | 0.85                      | 1.02    | 0.98   | 0.87   | 1.14          | 0.98    | 0.92   | 0.97   |
| Q9D967     | 67881      | Mdp1    | 0.84                      |         | 1.20   |        | 1.30          | 0.99    | 0.89   |        |
| P06801     | 17436      | Me1     | 0.93                      | 0.84    |        | 0.85   | 1.40          | 0.96    | 0.95   | 0.85   |
| Q8BMF3     | 109264     | Me3     | 0.93                      |         | 1.11   | 1.02   | 1.01          |         | 1.51   | 1.83   |
| Q80U63     | 170731     | Mfn2    | 1.58                      |         | 1.15   |        |               |         |        |        |
| Q9EQQ9     | 76055      | Mgea5   |                           | 1.01    |        | 1.05   | 1.02          | 0.97    | 1.05   | 1.08   |
| O35678     | 23945      | Mgll    |                           |         | 1.81   |        |               | 1.24    |        | 1.34   |
| Q9CPU4     | 66447      | Mgst3   | 1.13                      | 1.11    | 1.10   | 0.92   | 0.77          | 1.42    | 0.84   | 1.14   |
| Q8CJ19     | 194401     | Mical3  |                           |         | 0.91   |        |               |         |        |        |
| Q8VXC5     | 216001     | Micu1   | 1.15                      |         |        |        |               |         | 1.01   |        |
| P34884     | 17319      | Mif     |                           |         |        |        |               |         | 0.97   |        |
| Q9JM52     | 50932      | Mink1   | 2.08                      | 1.60    | 1.42   | 1.49   | 1.64          | 1.41    | 0.96   | 1.24   |
| Q7TNS2     | 433771     | Minos1  |                           |         | 1.11   |        |               | 1.18    |        |        |
| Q9QZQ1     | 17356      | Mllt4   |                           | 1.18    | 1.22   | 1.92   |               |         | 2.73   | 1.42   |
| Q8C7H1     | 109136     | Mmaa    |                           |         |        |        |               |         |        | 1.04   |
| Q8K273     | 236792     | Mmgt1   |                           | 1.04    |        |        |               |         |        |        |
| Q9CQY6     | 67267      | Mnf1    | 0.84                      |         |        |        | 0.94          |         |        | 1.96   |
| Q9D2P8     | 17433      | Mobp    | 1.30                      | 0.77    | 0.76   |        | 0.99          | 0.96    | 1.71   | 0.59   |
| Q61885     | 17441      | Mog     | 0.78                      | 0.78    | 0.73   | 0.66   | 0.47          | 0.85    | 0.88   | 0.64   |
| Q80TL7     | 67074      | Mon2    | 1.30                      |         |        | 1.19   |               | 1.08    | 1.40   | 1.05   |
| Q9WV34     | 50997      | Mpp2    | 0.94                      | 1.12    | 1.59   |        | 1.60          |         | 1.01   | 1.59   |
| Q88910     | 13384      | Mpp3    |                           |         |        |        | 1.27          | 1.06    |        | 1.00   |
| Q99J99     | 246221     | Mpst    | 1.07                      |         | 1.03   | 1.06   | 0.96          | 1.05    | 0.97   | 1.24   |
| O08989     | 17532      | Mras    | 1.17                      | 1.00    | 1.09   | 1.21   | 1.37          | 1.05    | 0.88   | 1.02   |
| Q9DB15     | 56282      | Mrpl12  | 1.15                      | 1.03    | 0.90   | 1.08   |               | 0.98    |        | 0.95   |
| Q9D1H8     | 68499      | Mrpl53  |                           |         |        | 1.17   |               |         |        |        |
| Q9CPX7     | 66242      | Mrps16  | 1.48                      |         |        |        |               | 1.35    |        |        |
| Q9CQX8     | 66128      | Mrps36  | 1.73                      | 0.99    | 0.97   | 1.90   | 1.63          | 0.98    | 2.50   | 0.94   |
| P26041     | 17698      | Msn     |                           | 1.22    |        |        | 1.22          | 1.31    | 1.03   | 1.15   |
| Q791V5     | 56428      | Mtch2   | 0.96                      | 1.04    | 1.04   | 0.95   | 1.05          | 1.20    | 1.06   | 1.09   |
| Q9CRB8     | 67900      | Mtfp1   | 1.17                      |         |        |        | 1.39          | 1.21    | 1.30   |        |
| Q922D8     | 108156     | Mthfd1  | 0.93                      | 0.86    | 0.86   |        |               | 0.94    |        | 0.83   |
| Q3V3R1     | 270685     | Mthfd1l | 1.87                      | 1.03    | 1.12   | 1.17   |               | 1.01    |        | 1.05   |
| Q9Z2C4     | 53332      | Mtmr1   |                           |         | 1.07   |        |               | 1.16    |        | 0.81   |

Supp. Table 1 (cont.)

| Uniprot_ID | Entrez_Gen | Symbol  | Developmental Myelination |         |        |        | Remyelination |         |        |        |
|------------|------------|---------|---------------------------|---------|--------|--------|---------------|---------|--------|--------|
|            |            |         | Mut-w11                   | Mut-w12 | WT-w11 | WT-w12 | Mut-w11       | Mut-w12 | WT-w11 | WT-w12 |
| Q9JLN9     | 56717      | Mtor    | 1.40                      | 0.91    |        | 1.22   | 1.28          | 1.04    | 1.41   |        |
| P62774     | 14489      | Mtpn    | 1.11                      | 0.94    | 1.03   | 1.06   | 1.02          | 0.93    | 0.88   | 0.99   |
| P47802     | 17827      | Mtx1    |                           |         |        |        |               |         | 0.89   |        |
| O88441     | 53375      | Mtx2    | 1.11                      | 1.11    | 0.96   | 0.88   | 1.11          | 1.09    | 1.15   | 0.97   |
| Q8VCM5     | 68350      | Mul1    |                           | 1.05    | 1.20   |        |               | 0.92    |        | 0.84   |
| P16332     | 17850      | Mut     | 1.29                      | 0.94    | 0.87   |        | 0.87          | 0.90    |        | 0.93   |
| P09922     | 17858 178  | Mx1     | 0.90                      |         | 1.63   | 1.11   | 0.88          |         | 0.85   |        |
| Q8C854     | 17876      | Myef2   | 1.37                      | 1.05    | 1.02   |        | 0.93          | 1.09    | 1.35   | 1.07   |
| Q5SX40     | 17879      | Myh1    |                           |         |        |        |               | 4.40    |        |        |
| Q61879     | 77579      | Myh10   | 0.98                      | 1.04    | 1.02   | 1.00   | 0.90          | 1.08    | 1.11   | 1.04   |
| Q6URW6     | 71960      | Myh14   | 1.57                      |         | 0.83   | 0.94   | 1.02          |         | 1.20   | 0.84   |
| Q8VDD5     | 17886      | Myh9    | 1.23                      | 1.16    | 1.22   | 1.23   | 0.97          | 1.26    | 1.32   | 1.14   |
| P05977     | 17901      | Myl1    |                           | 0.78    | 0.93   |        |               | 0.97    |        | 1.01   |
| Q3THE2     | 67938      | Myl12b  | 1.37                      | 1.14    | 1.10   |        | 1.36          | 1.06    | 1.35   | 1.11   |
| Q60605     | 17904      | Myl6    | 1.14                      | 1.03    | 0.97   | 1.30   | 1.05          | 0.97    | 1.09   | 1.10   |
| Q9JMH9     | 360013     | Myo18a  | 0.99                      | 0.93    | 1.17   | 0.97   | 0.90          | 1.10    | 1.10   | 0.96   |
| Q99104     | 17918      | Myo5a   | 0.89                      | 0.91    | 1.01   | 1.01   | 0.97          | 0.99    | 1.02   | 1.03   |
| Q64331     | 17920      | Myo6    | 0.85                      | 1.12    | 0.78   | 1.09   | 1.07          | 0.79    | 1.61   | 1.22   |
| Q6PGB6     | 72117      | Naa50   |                           |         |        |        | 1.29          | 1.09    |        | 1.19   |
| P70670     | 17938      | Naca    | 1.21                      | 0.96    | 1.02   | 1.06   | 1.50          | 0.99    | 1.08   | 0.97   |
| P28656     | 53605      | Nap1l1  | 0.98                      |         | 1.05   | 1.13   | 1.05          | 1.01    | 1.07   |        |
| Q78ZA7     | 17955      | Nap1l4  | 1.17                      |         |        |        | 1.57          |         | 1.08   |        |
| Q9DB05     | 108124     | Napa    | 1.24                      | 1.10    | 1.07   | 1.11   | 0.98          | 1.05    | 1.14   | 0.97   |
| P28663     | 17957      | Napb    | 1.21                      | 1.05    | 1.07   | 1.24   | 1.02          | 0.99    | 1.11   | 1.01   |
| Q9CWZ7     | 108123     | Napg    | 1.05                      | 1.01    | 1.01   | 1.04   | 0.57          | 0.99    | 1.08   | 0.99   |
| Q8BP47     | 70223      | Nars    | 1.19                      | 1.09    | 1.05   | 1.11   | 0.88          | 1.31    | 1.34   | 0.99   |
| Q9EPN1     | 26422      | Nbea    | 1.25                      | 1.14    | 1.21   | 1.25   | 0.99          | 1.19    | 0.94   | 1.10   |
| Q91X97     | 52589      | Ncald   | 1.03                      | 0.99    | 1.15   | 1.03   | 1.22          | 1.07    | 0.88   | 1.06   |
| P13595     | 17967      | Ncam1   | 0.90                      | 1.04    | 0.94   | 0.79   | 1.12          | 0.91    | 0.98   | 0.93   |
| O35136     | 17968      | Ncam2   | 1.02                      | 1.03    | 0.96   | 1.06   | 1.37          | 0.96    | 1.00   | 0.92   |
| P55066     | 13004      | Ncan    | 2.09                      | 1.07    | 1.14   | 1.94   |               | 1.43    | 1.76   | 1.01   |
| Q9Z0E0     | 26562      | Ncdn    | 1.08                      | 1.02    | 0.97   | 1.10   | 0.84          | 0.96    | 0.93   | 1.00   |
| Q8BLF1     | 320024     | Nceh1   | 1.36                      |         |        | 1.05   | 0.99          |         | 0.84   |        |
| P28660     | 50884      | Nckap1  | 1.10                      | 1.03    | 1.01   | 1.07   | 0.99          | 1.08    | 0.93   | 1.05   |
| Q9ESJ4     | 80987      | Nckipsd | 1.27                      | 1.10    | 0.92   | 1.48   | 1.10          | 1.07    | 1.15   | 1.06   |
| P09405     | 17975      | Ncl     | 5.92                      | 1.04    | 1.04   | 5.48   | 5.56          | 1.09    | 4.36   | 1.06   |
| Q8BNY6     | 14299      | Ncs1    | 0.93                      | 1.44    | 0.96   | 0.88   | 1.05          | 1.06    |        | 1.09   |
| P57716     | 59287      | Ncstn   |                           | 0.99    | 1.21   |        |               | 1.18    |        | 1.53   |
| P03888     | 17716      | Nd1     | 0.98                      | 0.98    | 1.54   | 0.70   | 0.85          | 1.11    | 1.23   | 1.27   |
| P03911     | 17719      | Nd4     | 0.93                      | 1.02    | 0.93   | 0.66   | 0.95          | 1.25    | 1.13   | 1.15   |
| Q62433     | 17988      | Ndrp1   | 1.26                      |         |        |        |               |         |        |        |
| Q9QYG0     | 29811      | Ndrp2   | 0.92                      | 1.06    | 0.80   | 0.88   | 0.88          | 0.99    | 1.10   | 0.94   |
| Q9QYF9     | 29812      | Ndrp3   | 1.20                      |         |        |        | 1.32          | 1.33    | 1.33   |        |
| Q8BTG7     | 234593     | Ndrp4   | 0.86                      | 1.18    |        |        |               | 1.12    |        | 1.00   |
| O35683     | 54405      | Ndufa1  |                           |         |        |        | 0.89          |         |        |        |
| Q99LC3     | 67273      | Ndufa10 | 0.99                      | 0.91    | 1.02   | 0.77   | 0.88          | 1.07    | 1.01   | 1.02   |

Supp. Table 1 (cont.)

| Uniprot ID | Entrez Gene | Symbol      | Developmental Myelination |         |        |        | Remyelination |         |        |        |
|------------|-------------|-------------|---------------------------|---------|--------|--------|---------------|---------|--------|--------|
|            |             |             | Mut-w11                   | Mut-w12 | WT-w11 | WT-w12 | Mut-w11       | Mut-w12 | WT-w11 | WT-w12 |
| Q9D8B4     | 239760 69   | Ndufa11     |                           |         |        |        | 1.02          |         |        |        |
| Q7TMF3     | 66414       | Ndufa12     | 0.94                      | 0.90    | 1.04   | 0.74   | 0.80          | 1.09    | 1.07   | 1.01   |
| Q9ERS2     | 67184       | Ndufa13     | 1.03                      | 0.91    | 0.92   | 0.90   | 0.80          | 1.06    | 1.11   | 1.00   |
| Q9CQ75     | 17991       | Ndufa2      | 1.01                      | 0.97    | 1.06   | 0.70   | 0.81          | 1.07    | 1.04   | 0.98   |
| Q9CQ91     | 66091       | Ndufa3      |                           |         | 0.93   |        |               | 1.08    |        |        |
| Q62425     | 17992       | Ndufa4      | 1.11                      | 1.04    | 1.04   | 1.16   | 0.89          | 0.97    | 1.06   | 1.02   |
| Q9CPP6     | 68202       | Ndufa5      | 0.91                      | 0.94    | 1.01   | 0.78   | 0.79          | 1.06    |        | 0.94   |
| Q9CQZ5     | 67130       | Ndufa6      | 0.98                      | 0.93    | 0.97   | 0.88   | 0.91          | 1.02    | 0.99   | 1.01   |
| Q9Z1P6     | 66416       | Ndufa7      | 1.15                      | 0.91    | 0.95   | 0.89   | 0.95          | 1.06    | 1.24   | 1.02   |
| Q9DCJ5     | 68375       | Ndufa8      | 0.93                      | 0.95    | 1.00   | 0.67   | 0.78          | 1.11    | 1.18   | 1.04   |
| Q9DC69     | 66108       | Ndufa9      | 0.94                      | 0.97    | 1.01   | 0.81   | 0.87          | 1.11    | 1.06   | 0.97   |
| Q9CR21     | 70316       | Ndufab1     | 0.86                      | 0.99    | 0.97   | 0.66   |               | 1.04    | 1.14   | 0.98   |
| Q9D1H6     | 68493       | Ndufaf4     |                           | 0.98    |        |        |               | 1.27    |        |        |
| Q9DCS9     | 68342       | Ndufb10     | 1.38                      | 1.12    | 1.36   | 0.99   | 1.17          | 1.17    | 1.47   | 1.18   |
| O09111     | 104130      | Ndufb11     |                           | 0.88    | 1.04   |        |               | 1.17    |        | 0.95   |
| Q9CQZ6     | 66495       | Ndufb3      | 0.94                      | 0.91    | 1.02   | 0.75   | 0.95          | 1.07    | 1.12   | 0.99   |
| Q9CQC7     | 100041273   | Ndufb4      | 1.06                      | 0.97    | 0.96   | 0.88   | 0.80          | 1.03    | 1.12   | 1.02   |
| Q9CQH3     | 66046       | Ndufb5      | 0.88                      | 0.90    | 0.98   | 0.74   | 0.90          | 1.15    | 1.23   | 1.00   |
| Q3UIU2     | 230075      | Ndufb6      | 1.06                      | 0.98    | 1.01   | 0.62   | 0.81          | 1.08    | 1.10   | 1.00   |
| Q9CR61     | 66916       | Ndufb7      |                           | 0.92    | 1.04   |        |               | 1.04    |        |        |
| Q9D6J5     | 67264       | Ndufb8      | 0.99                      | 0.99    | 1.10   | 0.65   |               | 1.22    |        | 1.08   |
| Q9CQJ8     | 66218       | Ndufb9      |                           |         | 1.14   |        |               |         |        |        |
| Q9CQ54     | 68197       | Ndufc2      | 1.18                      | 0.94    | 1.01   | 0.83   | 0.97          | 1.09    | 1.27   | 0.97   |
| Q91VD9     | 227197      | Ndufs1      | 0.95                      | 0.92    | 0.99   | 0.73   | 0.93          | 1.09    | 1.18   | 1.01   |
| Q91WD5     | 226646      | Ndufs2      | 1.01                      | 0.97    | 1.05   | 0.93   | 0.97          | 1.08    | 1.19   | 0.97   |
| Q9DCT2     | 68349       | Ndufs3      | 0.98                      | 0.94    | 1.05   | 0.68   | 0.90          | 1.08    | 1.16   | 1.02   |
| Q9CXZ1     | 17993       | Ndufs4      | 1.03                      | 0.91    | 1.02   |        | 0.87          | 1.05    | 1.14   | 0.99   |
| Q99LY9     | 595136      | Ndufs5      | 1.00                      | 0.94    | 0.94   | 0.86   | 0.92          | 1.03    | 1.08   | 0.97   |
| P52503     | 623286 40   | Ndufs6      | 1.06                      | 0.95    | 1.02   | 0.81   | 0.98          | 1.12    | 1.05   | 0.97   |
| Q9DC70     | 75406       | Ndufs7      | 0.91                      | 0.96    | 1.00   | 0.99   | 0.87          | 1.11    | 1.09   | 0.99   |
| Q8K3J1     | 225887      | Ndufs8      | 1.14                      | 0.94    | 0.99   | 0.96   | 1.08          | 1.17    | 1.29   | 0.97   |
| Q91YT0     | 17995       | Ndufv1      | 0.98                      | 0.90    | 1.02   | 0.87   | 1.30          | 1.16    | 1.16   | 1.00   |
| Q9D6J6     | 72900       | Ndufv2      | 1.03                      | 0.98    | 1.13   |        | 1.00          | 1.13    | 1.15   | 1.07   |
| Q8BK30     | 78330       | Ndufv3      | 1.15                      | 0.96    | 1.00   | 0.83   | 1.10          | 1.02    | 1.38   | 1.02   |
| Q9CR95     | 67602       | Necap1      | 0.92                      | 0.95    | 1.01   | 1.12   | 1.17          | 0.92    | 1.24   | 0.98   |
| P46935     | 17999       | Nedd4       | 0.99                      |         |        | 1.02   | 1.14          | 1.08    |        |        |
| P29595     | 18002       | Nedd8       | 0.95                      | 1.01    | 1.00   | 1.03   | 1.01          | 0.94    | 0.97   | 0.95   |
| P19246     | 380684      | Nefh        | 1.38                      | 0.69    | 0.62   | 1.09   | 1.11          | 0.99    | 2.16   | 0.93   |
| P08551     | 18039       | Nefl        | 1.03                      | 0.79    | 0.78   | 0.76   | 0.65          | 1.20    | 1.11   | 1.04   |
| P08553     | 18040       | Nefm        | 1.03                      | 0.81    | 0.77   | 0.79   | 0.66          | 1.11    | 1.13   | 1.10   |
| Q80Z24     | 320840      | Negr1       | 0.87                      | 0.98    | 1.18   |        | 1.17          | 1.03    | 1.15   | 1.03   |
| Q04690     | 18015       | Nf1 (Includ | 1.15                      | 0.97    | 1.00   | 1.06   | 0.94          | 1.09    | 0.95   | 1.00   |
| Q810U3     | 269116      | Nfasc       | 0.94                      | 0.94    | 0.89   | 0.86   | 1.11          | 1.02    | 0.95   | 0.98   |
| Q9QZ23     | 56748       | Nfu1        |                           |         | 1.08   |        |               |         |        | 0.86   |
| Q8CHT1     | 53972       | Ngef        | 0.94                      | 1.00    | 1.46   |        |               | 1.12    | 1.24   | 1.21   |
| Q9EQ80     | 65102       | Nif3l1      |                           |         |        |        |               | 1.02    |        |        |

Supp. Table 1 (cont.)

| Uniprot_ID | Entrez_Gen | Symbol     | Developmental Myelination |         |        |        | Remyelination |         |        |        |
|------------|------------|------------|---------------------------|---------|--------|--------|---------------|---------|--------|--------|
|            |            |            | Mut-w11                   | Mut-w12 | WT-w11 | WT-w12 | Mut-w11       | Mut-w12 | WT-w11 | WT-w12 |
| Q55125     | 18082      | Nipsnap1   | 1.09                      | 1.05    | 0.94   | 0.94   | 0.89          | 0.92    | 1.04   | 0.97   |
| Q9CQE1     | 66536      | Nipsnap3a  | 0.84                      |         | 2.25   |        | 1.39          |         | 1.16   | 1.09   |
| Q69ZK9     | 216856     | Nlgn2      |                           | 1.12    | 0.92   |        |               | 1.07    |        | 0.99   |
| Q8BYM5     | 245537     | Nlgn3      |                           |         | 0.88   |        |               | 0.72    |        | 1.03   |
| Q91YP2     | 75805      | Nln        | 1.04                      | 1.16    | 1.09   | 1.36   | 1.31          | 0.87    | 1.06   | 0.95   |
| P15532     | 18102      | Nme1 (Incl | 0.94                      | 0.96    | 0.88   | 0.96   | 0.93          | 0.90    | 0.96   | 0.94   |
| Q01768     | 18103      | Nme2       | 0.93                      | 0.95    | 0.89   | 0.97   | 0.94          | 0.99    | 0.90   | 0.95   |
| Q8K2T1     | 67824      | Nmral1     | 0.94                      |         |        |        |               |         | 0.74   |        |
| Q99K48     | 53610      | Nono       | 0.97                      | 0.99    | 1.05   | 1.26   |               |         |        |        |
| Q9Z0J4     | 18125      | Nos1       |                           | 1.17    | 0.91   | 0.94   | 1.56          | 0.98    |        | 0.85   |
| Q11011     | 19155      | Npepps     | 0.93                      | 0.95    | 0.88   | 1.03   | 0.90          | 0.92    | 1.02   | 0.95   |
| P60670     | 217365     | Nploc4     | 0.97                      |         |        | 0.91   | 1.08          |         |        |        |
| Q61937     | 18148      | Npm1       |                           | 1.05    | 1.04   | 3.11   |               | 1.00    |        | 1.08   |
| P97300     | 20320      | Nptn       | 0.88                      | 0.98    | 1.20   |        | 1.26          | 1.14    | 0.69   | 1.12   |
| Q62443     | 18164      | Nptx1      | 1.03                      |         | 1.45   |        | 1.54          |         |        |        |
| P08556     | 18176      | Nras       |                           | 1.39    | 1.39   | 2.05   |               |         |        | 1.23   |
| Q810U4     | 319504     | Nrcam      | 0.82                      | 0.94    | 1.03   | 0.93   | 1.35          | 0.98    | 0.75   | 1.00   |
| P60761     | 64011      | Nrgn       |                           | 0.92    | 1.10   | 1.27   | 0.91          | 1.22    |        | 1.08   |
| Q8CFV4     | 68404      | Nrn1       | 1.41                      | 0.99    | 1.28   | 1.33   |               | 1.28    | 0.96   |        |
| Q9CS84     | 18189      | Nrxn1      | 0.90                      |         |        | 0.68   |               | 1.32    |        | 0.93   |
| Q9R1J0     | 18194      | Nsdhl      |                           |         |        |        |               | 0.87    |        | 0.95   |
| P46460     | 18195      | Nsf        | 1.03                      | 0.97    | 0.99   | 0.97   | 0.94          | 0.96    | 1.01   | 1.02   |
| Q9CZ44     | 386649     | Nsfl1c     |                           | 1.25    | 1.20   |        | 1.37          | 0.77    | 1.25   | 0.84   |
| Q9JM14     | 50773      | Nt5c       | 3.81                      | 0.98    | 1.04   |        | 1.20          | 0.95    | 1.16   | 0.96   |
| Q3UHB1     | 103466     | Nt5dc3     | 0.73                      |         | 0.80   | 0.86   |               | 1.41    | 0.81   | 0.75   |
| Q99PJ0     | 235106     | Ntm        | 0.93                      | 1.00    | 1.25   | 1.03   | 1.13          | 1.18    | 1.01   | 1.07   |
| P15209     | 18212      | Ntrk2      | 0.90                      | 1.10    | 1.01   | 0.91   | 1.19          | 1.19    | 1.04   | 1.07   |
| Q35685     | 18221      | Nudc       |                           | 0.92    | 0.99   |        |               | 1.06    |        | 0.92   |
| Q9CQF3     | 68219      | Nudt21     | 1.15                      | 1.09    | 1.12   | 0.96   | 0.95          | 1.04    | 0.97   | 1.17   |
| Q8BJ71     | 71805      | Nup93      |                           |         |        |        |               |         | 1.08   |        |
| P61971     | 621832 10  | Nutf2      | 1.10                      | 0.99    | 0.99   | 1.21   | 0.85          | 0.97    | 1.08   |        |
| P29758     | 18242      | Oat        |                           |         |        |        |               |         | 0.65   | 1.41   |
| Q9CRD0     | 68095      | Ociad1     | 2.49                      | 1.24    | 0.91   |        | 2.19          | 1.11    | 2.11   | 1.03   |
| Q9D8W7     | 433904     | Ociad2     | 1.18                      | 0.99    | 1.16   |        | 1.25          | 1.18    | 1.41   | 1.08   |
| Q60597     | 18293      | Ogdh       | 0.86                      | 0.96    | 0.90   | 0.81   | 0.87          | 0.96    | 0.92   | 0.97   |
| Q8VE52     | 70155      | Ogfrl1     | 1.19                      |         |        |        |               |         |        |        |
| Q8CGY8     | 108155     | Ogt        | 1.17                      | 1.07    | 1.12   | 1.17   | 0.89          | 1.09    | 1.07   | 1.05   |
| Q9CZ30     | 67059      | Ola1       | 0.94                      | 0.97    | 1.02   | 0.83   | 1.10          | 1.00    | 0.94   | 1.12   |
| P58281     | 74143      | Opa1       | 1.02                      | 1.02    | 1.06   | 1.00   | 1.01          | 1.09    | 0.99   | 1.01   |
| Q8K010     | 75475      | Oplah      |                           | 0.97    |        |        |               | 0.79    |        |        |
| Q3B7Z2     | 76303      | Osbp       |                           |         |        |        | 1.32          |         | 0.95   |        |
| Q8BWU5     | 66246      | Osgep      | 0.85                      |         |        |        |               |         | 0.58   |        |
| Q62422     | 20409      | Ostf1      |                           |         |        |        |               | 1.14    |        |        |
| Q8BGT0     | 14628      | Ostm1      |                           |         |        | 1.71   |               |         |        |        |
| Q7TQI3     | 107260     | Otub1      | 0.97                      | 1.00    | 0.98   | 0.97   | 0.81          | 0.95    | 0.92   | 0.96   |
| Q9D0K2     | 67041      | Oxct1      | 0.96                      | 0.91    | 0.99   | 1.01   | 0.89          | 0.97    | 0.86   | 0.97   |

Supp. Table 1 (cont.)

| Uniprot_ID | Entrez_Gen | Symbol   | Developmental Myelination |         |        |        | Remyelination |         |        |        |
|------------|------------|----------|---------------------------|---------|--------|--------|---------------|---------|--------|--------|
|            |            |          | Mut-w11                   | Mut-w12 | WT-w11 | WT-w12 | Mut-w11       | Mut-w12 | WT-w11 | WT-w12 |
| Q4KMM3     | 170719     | Oxr1     | 1.39                      | 0.99    | 1.16   | 1.40   | 1.21          | 1.04    | 1.39   | 1.04   |
| P09103     | 18453      | P4hb     | 1.04                      | 0.96    | 0.98   | 0.85   | 1.19          |         | 0.97   | 1.15   |
| P50580     | 18813      | Pa2g4    |                           | 1.08    |        |        |               | 0.96    |        | 1.26   |
| P29341     | 18458      | Pabpc1   | 1.06                      | 1.02    | 1.00   | 1.21   | 1.04          | 1.00    | 0.94   | 1.00   |
| Q8K212     | 107975     | Pacs1    | 1.40                      | 1.03    | 1.15   | 1.17   | 1.20          | 1.00    | 1.29   | 1.01   |
| Q61644     | 23969      | Pacsin1  | 0.99                      | 1.00    | 1.01   | 1.00   | 1.35          | 0.91    | 0.96   | 0.99   |
| P63005     | 18472      | Pafah1b1 | 0.94                      | 1.00    | 1.02   |        | 0.89          | 1.07    | 1.05   | 0.91   |
| Q9DCL9     | 67054      | Paics    | 0.98                      | 0.97    | 0.94   | 1.07   | 0.83          | 1.09    | 0.89   | 1.06   |
| Q88643     | 18479      | Pak1     | 1.20                      | 1.02    | 0.95   | 1.21   | 1.08          | 0.93    | 1.12   | 0.97   |
| Q61036     | 18481      | Pak3     | 0.90                      | 1.05    | 1.10   | 0.86   | 0.89          | 0.59    | 0.96   | 0.95   |
| Q9Z0P4     | 18483      | Palm     | 1.95                      | 0.89    | 1.17   |        | 1.29          | 1.16    | 1.45   | 1.19   |
| Q9CQV1     | 66449      | Pam16    |                           | 1.39    |        |        |               | 1.13    |        |        |
| Q99LX0     | 57320      | Park7    | 0.96                      | 0.96    | 0.90   | 1.02   | 1.00          | 0.94    | 1.11   | 0.93   |
| Q05920     | 18563      | Pc       | 0.95                      | 0.95    | 0.84   | 1.05   | 0.88          | 0.95    | 1.05   | 0.88   |
| P60335     | 23983      | Pcbp1    | 1.13                      | 1.12    | 1.13   |        | 1.18          | 1.09    | 1.18   | 0.97   |
| Q61990     | 18521      | Pcbp2    |                           | 1.04    | 0.90   |        | 1.07          | 1.12    |        | 1.06   |
| Q91ZA3     | 110821     | Pcca     | 1.09                      | 1.06    | 0.90   |        | 0.78          | 0.95    | 0.86   | 0.94   |
| Q99MN9     | 66904      | Pccb     | 1.05                      | 1.02    | 1.06   |        |               |         | 1.20   | 1.12   |
| Q8BH04     | 74551      | Pck2     | 1.07                      | 1.06    |        | 1.56   | 1.29          |         | 1.30   | 0.97   |
| Q9QYX7     | 26875      | Pclo     | 1.32                      | 1.26    | 1.41   | 1.56   | 1.80          | 1.45    | 1.70   | 1.20   |
| P23506     | 18537      | Pcmt1    | 0.91                      | 0.92    | 0.96   | 0.94   | 0.94          | 0.95    | 0.94   | 0.92   |
| P63054     | 18546      | Pcp4     | 1.16                      | 1.01    | 0.98   | 0.98   | 1.09          | 0.97    |        |        |
| Q6W8Q3     | 66425      | Pcp4l1   | 1.32                      | 1.09    | 0.91   |        | 1.22          | 0.94    |        | 1.08   |
| Q9CQF9     | 66881      | Pcyox1   | 0.87                      |         |        |        | 1.15          |         | 0.90   |        |
| Q3UHX2     | 231887     | Pdap1    | 1.42                      | 1.08    | 1.02   | 1.77   | 1.77          | 0.99    | 1.18   | 1.09   |
| Q8VE70     | 56426      | Pdcd10   | 1.13                      |         |        |        | 1.41          |         | 1.39   |        |
| P56812     | 100042424  | Pdcd5    | 1.14                      | 0.98    | 1.01   |        | 0.95          | 0.90    |        | 0.92   |
| P12815     | 18570      | Pdcd6    | 1.02                      | 0.97    | 1.04   | 0.97   | 0.74          | 0.91    | 1.02   | 0.99   |
| Q9WU78     | 18571      | Pdcd6lp  | 2.19                      | 0.93    | 0.85   | 2.56   | 1.14          | 1.05    | 1.17   | 0.97   |
| Q8CA95     | 23984      | Pde10a   | 0.90                      | 1.03    | 0.87   |        | 0.90          | 1.04    | 1.04   | 0.96   |
| Q61481     | 18573      | Pde1a    | 1.00                      | 0.96    | 1.02   |        |               | 0.96    |        | 1.01   |
| Q01065     | 18574      | Pde1b    | 1.19                      | 1.04    | 1.03   |        | 1.38          |         | 0.99   | 1.28   |
| Q922S4     | 207728     | Pde2a    | 1.19                      | 0.99    | 0.94   |        | 1.50          | 0.86    | 1.01   | 1.08   |
| P35486     | 18597      | Pdha1    | 1.04                      | 1.04    | 1.02   | 1.03   | 1.03          | 1.06    | 1.17   | 0.97   |
| Q9D051     | 68263      | Pdhb     | 1.05                      | 1.02    | 1.00   | 1.06   | 1.14          | 1.01    | 0.98   | 1.01   |
| Q8BKZ9     | 27402      | Pdhx     |                           |         | 0.84   |        |               |         |        |        |
| P27773     | 14827      | Pdia3    | 1.05                      | 0.99    | 1.02   | 0.94   | 1.26          | 1.34    | 1.02   | 0.99   |
| P08003     | 12304      | Pdia4    | 0.88                      | 0.95    | 0.96   | 1.22   | 1.58          | 1.12    |        | 1.01   |
| Q922R8     | 71853      | Pdia6    |                           |         |        |        |               | 1.04    | 0.97   |        |
| Q8K183     | 216134     | Pdxk     | 0.88                      | 0.99    | 0.85   | 0.84   |               | 0.85    | 1.00   | 0.91   |
| Q62048     | 18611      | Pea15    | 1.06                      | 0.96    | 0.93   | 1.16   | 1.05          | 0.82    | 0.80   | 0.91   |
| P70296     | 23980      | Pebp1    | 1.07                      | 0.97    | 0.95   | 1.10   | 1.09          | 0.96    | 1.00   | 1.08   |
| Q8BFY6     | 67898      | Pef1     |                           |         |        |        |               | 1.34    |        |        |
| Q5SUR0     | 237823     | Pfas     | 1.05                      | 1.10    | 1.18   | 1.04   |               |         | 1.25   |        |
| Q9CWM4     | 67199      | Pfdn1    |                           | 0.88    | 0.88   | 0.86   |               | 0.83    |        | 0.92   |
| O70591     | 18637      | Pfdn2    |                           | 1.34    | 0.97   |        |               |         |        | 0.96   |

Supp. Table 1 (cont.)

| Uniprot_ID | Entrez_Gen | Symbol  | Developmental Myelination |         |        |        | Remyelination |         |        |        |
|------------|------------|---------|---------------------------|---------|--------|--------|---------------|---------|--------|--------|
|            |            |         | Mut-w11                   | Mut-w12 | WT-w11 | WT-w12 | Mut-w11       | Mut-w12 | WT-w11 | WT-w12 |
| Q9WU28     | 56612      | Pfdn5   | 1.00                      | 0.82    | 1.24   |        | 0.95          | 0.91    | 1.42   | 1.11   |
| Q03958     | 14976      | Pfdn6   |                           | 0.96    | 0.94   | 1.10   |               | 0.84    |        | 0.84   |
| P12382     | 18641      | Pfkl    | 0.90                      | 0.92    | 1.03   | 1.08   | 0.89          | 0.98    | 0.68   | 0.99   |
| P47857     | 18642      | Pfkm    | 1.03                      | 0.94    | 0.98   | 1.02   | 0.86          | 1.01    | 0.83   | 0.97   |
| Q9WUA3     | 56421      | Pfkp    | 0.96                      | 1.00    | 1.05   | 0.98   | 0.93          | 1.01    | 0.85   | 1.01   |
| P62962     | 18643      | Pfn1    | 1.03                      | 0.96    | 1.00   | 1.04   | 1.12          | 1.03    | 0.73   | 1.00   |
| Q9JJV2     | 18645      | Pfn2    | 1.01                      | 0.88    | 0.91   | 1.02   | 0.81          | 0.99    | 0.63   | 0.90   |
| Q9DBJ1     | 18648      | Pgam1   | 0.90                      | 0.98    | 0.91   | 0.82   | 1.11          | 0.95    | 0.89   | 0.95   |
| Q9DCD0     | 110208     | Pgd     | 0.92                      |         |        | 0.95   | 0.84          |         | 1.23   |        |
| P09411     | 18655      | Pgk1    | 1.01                      | 0.98    | 0.97   | 0.95   | 0.96          | 1.01    | 1.06   | 0.97   |
| Q9CQ60     | 66171      | Pgls    | 0.91                      | 0.93    | 0.99   |        | 0.89          | 0.93    | 1.12   | 0.98   |
| Q9D0F9     | 72157      | Pgm1    | 0.81                      | 0.95    | 0.77   | 0.71   | 1.05          | 0.89    | 0.95   | 0.84   |
| Q8CAA7     | 70974      | Pgm2l1  | 1.03                      | 0.96    | 1.02   | 1.12   | 0.87          | 0.92    | 0.87   | 0.98   |
| Q8CHP8     | 67078      | Pgp     |                           | 0.94    | 0.94   | 1.06   |               | 0.84    |        | 0.93   |
| O55022     | 53328      | Pgrmc1  | 1.15                      | 1.00    | 0.94   | 0.91   | 1.03          | 0.86    |        | 1.01   |
| Q2M3X8     | 218194     | Phactr1 |                           | 0.97    |        |        |               |         |        |        |
| Q501J7     | 100169     | Phactr4 |                           | 1.03    | 0.93   | 1.30   |               | 1.06    |        | 0.98   |
| P67778     | 18673      | Phb     | 0.95                      | 1.02    | 1.11   | 0.79   | 0.93          | 1.16    | 1.26   | 1.06   |
| O35129     | 12034      | Phb2    | 1.05                      | 1.08    | 1.09   | 0.74   | 0.91          | 1.16    | 1.19   | 1.05   |
| Q61753     | 236539     | Phgdh   | 1.38                      | 1.02    | 0.94   |        | 0.93          | 0.93    |        | 0.86   |
| Q9DAK9     | 75454      | Phpt1   | 1.16                      | 0.89    | 0.90   | 0.99   | 1.05          | 0.86    | 0.82   | 0.92   |
| Q8K0S0     | 105653     | Phyhip  | 1.04                      | 0.92    | 1.10   |        |               | 1.05    | 0.95   | 1.05   |
| Q7M6Y3     | 233489     | Picalm  | 1.25                      | 1.11    | 1.18   | 1.09   | 0.66          | 1.29    | 1.07   | 0.94   |
| Q6PF93     | 225326     | Pik3c3  |                           |         |        |        |               | 0.70    |        | 0.66   |
| P26450     | 18708      | Pik3R1  |                           |         | 0.96   |        |               |         |        |        |
| Q9QUR7     | 23988      | Pin1    | 0.95                      | 1.15    | 1.02   | 0.93   | 1.08          | 0.97    | 1.08   | 1.08   |
| O70172     | 18718      | Pip4K2a | 0.94                      | 1.23    |        | 0.92   | 1.21          | 1.51    | 0.91   | 0.93   |
| Q91XU3     | 117150     | Pip4K2c |                           | 0.97    |        |        |               |         |        | 1.55   |
| O70161     | 18717      | Pip5K1c | 1.26                      | 0.99    | 1.42   | 1.31   | 0.98          | 1.18    | 1.01   | 0.81   |
| Q8BWR2     | 66193      | Pithd1  | 0.91                      |         |        |        | 1.00          | 1.07    | 1.04   |        |
| P53810     | 18738      | Pitpna  | 0.94                      | 0.95    | 0.95   | 0.96   | 1.28          | 0.96    | 1.07   | 0.92   |
| P53811     | 56305      | Pitpnb  |                           |         |        | 0.90   |               |         |        |        |
| O35954     | 18739      | Pitpnm1 | 1.51                      |         | 1.04   | 1.84   | 1.63          |         |        | 1.00   |
| Q6ZPQ6     | 19679      | Pitpnm2 | 7.11                      |         |        | 1.43   |               |         |        |        |
| Q8K411     | 69617      | Pitrm1  | 0.23                      |         |        |        |               |         |        |        |
| P63248     | 18767      | Pkia    |                           | 1.02    | 0.83   |        |               |         |        |        |
| P52480     | 18746      | Pkm2    | 0.96                      | 0.96    | 0.91   | 0.87   | 0.87          | 0.84    | 1.02   | 0.94   |
| Q9Z1B3     | 18795      | Plcb1   | 1.60                      | 1.02    | 1.06   | 1.46   | 1.89          | 0.87    | 1.29   | 1.09   |
| Q62077     | 18803      | Plcg1   |                           |         |        |        |               |         | 1.07   |        |
| Q8K394     | 224860     | Plcl2   |                           | 1.11    |        |        |               |         |        |        |
| Q8BLJ3     | 239318     | Plcxd3  | 0.91                      | 0.99    | 0.96   | 1.09   | 0.97          | 0.76    | 1.01   | 0.96   |
| Q9QXS1     | 18810      | Plec    | 1.07                      | 0.99    | 1.04   | 1.08   | 1.10          | 1.21    | 1.01   | 1.24   |
| P60202     | 18823      | Plp1    | 0.72                      | 0.76    | 0.72   | 0.63   | 0.46          | 0.88    | 0.69   | 0.66   |
| Q99K51     | 102866     | Pls3    | 1.06                      | 1.12    | 1.02   | 1.55   | 0.89          | 0.90    | 1.01   | 0.93   |
| P70206     | 18844      | Plxna1  | 1.20                      | 0.94    | 1.17   | 1.19   |               | 1.11    | 1.26   | 0.90   |
| Q80UG2     | 243743     | Plxna4  | 1.28                      | 0.98    | 0.96   | 1.05   |               | 1.20    | 0.94   | 0.98   |



Supp. Table 1 (cont.)

| Uniprot_ID | Entrez_Gen | Symbol                    | Developmental Myelination |         |        |        | Remyelination |         |        |        |
|------------|------------|---------------------------|---------------------------|---------|--------|--------|---------------|---------|--------|--------|
|            |            |                           | Mut-w11                   | Mut-w12 | WT-w11 | WT-w12 | Mut-w11       | Mut-w12 | WT-w11 | WT-w12 |
| O35621     | 29858      | Pmm1                      |                           | 0.95    |        |        |               | 0.78    |        | 1.05   |
| Q9QYK9     | 93843      | Pnck                      | 1.63                      |         |        |        |               |         |        |        |
| O35691     | 18949      | Pnn                       |                           |         |        |        |               |         | 2.52   |        |
| P23492     | 667034 184 | Pnp                       | 0.93                      | 1.15    | 1.04   | 0.96   |               | 0.90    |        | 1.30   |
| Q6R3M4     | 26447      | Poli                      |                           |         | 0.98   |        |               |         |        | 0.82   |
| P37040     | 18984      | Por                       | 1.04                      | 1.25    | 0.94   | 0.90   | 1.74          | 0.96    | 1.11   | 0.89   |
| Q9D819     | 67895      | Ppa1                      | 1.06                      | 1.02    | 1.11   | 1.25   | 1.04          | 1.03    | 1.07   | 1.04   |
| Q91VM9     | 74776      | Ppa2 (Includes eg:2       | 1.00                      | 1.00    | 0.95   |        |               | 0.92    |        | 1.07   |
| Q99JY8     | 67916      | Ppap2b                    |                           |         |        |        |               |         | 1.29   |        |
| Q8BSS9     | 327814     | Ppfia2                    | 1.42                      |         | 1.34   | 1.54   |               | 3.23    | 1.29   | 1.19   |
| P60469     | 76787      | Ppfia3                    | 1.16                      | 1.09    | 1.02   | 1.01   | 1.02          | 1.06    | 1.13   | 1.01   |
| P17742     | 268373     | Ppia                      | 0.89                      | 0.99    | 0.92   | 0.88   | 0.98          | 0.93    | 0.86   | 0.95   |
| P24369     | 19035      | Ppib                      | 0.90                      | 0.97    | 1.09   | 0.94   | 0.85          | 0.96    | 0.99   | 1.04   |
| Q9CR16     | 67738      | Ppid                      |                           | 1.29    | 0.89   |        |               | 1.07    |        |        |
| Q99KR7     | 105675     | Ppif                      |                           | 0.99    | 0.86   |        |               | 0.92    |        | 0.94   |
| Q80TL0     | 320472     | Ppm1e                     |                           | 1.18    | 0.98   |        | 2.25          | 1.13    |        | 1.08   |
| Q3UYC0     | 319468     | Ppm1h                     |                           |         |        | 1.35   |               |         | 0.93   |        |
| Q8BVQ5     | 72590      | Ppme1                     | 1.15                      | 1.05    | 1.37   |        | 1.10          |         | 0.85   | 1.09   |
| P62137     | 19045      | Ppp1ca                    | 1.22                      | 0.99    | 1.16   | 1.37   | 1.05          | 0.99    | 1.17   | 1.12   |
| P63087     | 19047      | Ppp1cc                    | 0.99                      | 1.01    | 1.02   | 1.02   |               | 0.91    | 1.21   | 1.06   |
| Q9DBR7     | 17931      | Ppp1R12a                  |                           |         |        | 2.03   |               | 0.96    |        |        |
| Q91VC7     | 68458      | Ppp1R14a                  |                           | 0.78    | 0.75   |        |               | 0.82    |        | 0.66   |
| Q9ERT9     | 58200      | Ppp1R1a (Includes eg:5502 |                           |         | 1.10   |        |               | 1.01    |        |        |
| Q60829     | 19049      | Ppp1R1b                   |                           | 0.83    |        |        | 1.13          | 1.01    |        | 0.96   |
| Q9DCL8     | 66849      | Ppp1R2                    |                           | 0.88    | 0.91   | 1.45   |               | 0.79    |        | 0.96   |
| Q3TDD9     | 73825      | Ppp1R21                   |                           |         |        |        |               |         |        | 1.06   |
| Q3UM45     | 66385      | Ppp1R7                    | 1.05                      | 1.22    | 1.18   | 1.09   | 0.94          | 1.06    | 1.07   | 0.86   |
| Q6R891     | 217124     | Ppp1R9b                   | 0.89                      | 0.91    | 0.98   | 1.44   | 1.29          | 0.99    | 1.20   | 0.99   |
| P62715     | 19053      | Ppp2cb                    |                           | 1.10    |        |        | 1.18          | 1.03    | 1.11   |        |
| Q76MZ3     | 51792      | Ppp2r1a                   | 1.16                      | 0.96    | 1.01   | 1.04   | 0.97          | 0.97    | 1.03   | 1.04   |
| Q6P1F6     | 71978      | Ppp2R2a                   | 0.83                      |         | 0.95   | 1.15   | 0.83          |         | 0.89   | 1.03   |
| P58389     | 110854     | Ppp2R4                    | 1.07                      | 1.03    | 0.86   | 1.12   |               | 0.88    | 1.05   | 1.04   |
| Q60996     | 26931      | Ppp2R5c                   | 1.38                      | 0.94    | 1.07   |        |               | 1.30    |        | 1.17   |
| Q61151     | 26932      | Ppp2r5e                   | 0.96                      |         |        | 0.97   | 0.73          |         | 1.05   |        |
| P63328     | 19055      | Ppp3ca                    | 1.12                      | 0.70    | 1.17   | 1.12   | 0.98          | 1.09    | 0.95   | 0.73   |
| P48453     | 19056      | Ppp3cb                    | 1.15                      |         | 1.14   |        |               |         | 1.24   | 1.32   |
| Q63810     | 19058      | Ppp3R1                    | 1.09                      | 0.99    | 1.11   | 1.20   | 0.98          | 1.05    | 0.85   | 1.04   |
| Q60676     | 19060      | Ppp5c                     | 1.12                      |         | 0.86   |        |               |         | 0.95   |        |
| Q9CQR6     | 67857      | Ppp6c                     |                           |         | 1.05   |        | 1.03          | 1.01    | 1.12   | 0.97   |
| Q8R3Q2     | 71474      | Ppp6R2                    |                           | 0.89    | 1.14   |        |               | 1.07    |        | 1.00   |
| Q922D4     | 52036      | Ppp6R3                    |                           |         |        | 1.27   |               |         |        |        |
| P35700     | 18477      | Prdx1                     | 0.89                      | 0.96    | 0.93   | 0.90   | 0.89          | 1.01    | 0.92   | 0.95   |
| Q61171     | 21672      | Prdx2                     | 0.89                      | 0.93    | 1.01   | 0.92   | 0.90          | 0.93    | 0.89   | 0.92   |
| P20108     | 11757      | Prdx3                     | 0.86                      | 1.14    | 0.96   |        | 1.37          | 1.02    | 0.94   | 0.98   |
| P99029     | 54683      | Prdx5                     | 0.88                      | 1.02    | 0.87   | 0.85   | 1.05          | 0.99    | 1.01   | 0.95   |
| O08709     | 11758      | Prdx6                     | 0.99                      | 1.05    | 1.14   | 1.10   | 1.11          | 1.14    | 1.01   | 1.13   |

Supp. Table 1 (cont.)

| Uniprot_ID | Entrez_Gen | Symbol    | Developmental Myelination |         |        |        | Remyelination |         |        |        |
|------------|------------|-----------|---------------------------|---------|--------|--------|---------------|---------|--------|--------|
|            |            |           | Mut-w11                   | Mut-w12 | WT-w11 | WT-w12 | Mut-w11       | Mut-w12 | WT-w11 | WT-w12 |
| Q9QUR6     | 19072      | Prep      | 0.96                      | 0.85    | 1.01   |        | 1.44          | 1.30    |        | 0.99   |
| Q69ZK0     | 277360     | Prex1     |                           | 1.02    | 0.94   | 1.14   |               | 0.94    |        | 1.12   |
| Q5EG47     | 105787     | Prkaa1    |                           |         |        |        |               | 0.96    |        |        |
| P05132     | 18747      | Prkaca    | 0.96                      | 0.99    | 1.00   | 0.96   | 0.84          | 0.99    | 0.98   | 0.99   |
| P68181     | 18749      | Prkacb    | 0.93                      | 1.10    | 1.04   | 0.93   | 0.85          | 1.01    | 0.86   | 1.01   |
| Q9DBC7     | 19084      | Prkar1a   |                           |         | 1.33   | 0.98   | 0.87          | 1.03    | 1.31   |        |
| P12367     | 19087      | Prkar2a   | 1.40                      | 1.13    |        |        | 1.15          | 0.81    |        |        |
| P31324     | 19088      | Prkar2b   | 1.17                      | 1.01    | 1.01   | 1.47   | 1.19          | 0.92    | 1.08   | 0.98   |
| P20444     | 18750      | Prkca     |                           | 1.17    | 1.51   | 1.08   |               | 1.73    |        | 1.25   |
| P68404     | 18751      | Prkcb     | 1.38                      | 1.13    | 1.37   | 1.19   | 0.78          | 1.32    | 1.25   | 1.08   |
| P28867     | 18753      | Prkcd     |                           | 1.04    | 1.05   |        | 0.87          | 1.56    |        | 1.04   |
| P16054     | 18754      | Prkce     | 1.04                      | 1.01    | 1.21   | 1.12   | 0.98          | 0.94    | 0.82   | 0.99   |
| P63318     | 18752      | Prkcg     | 1.17                      | 0.96    | 1.22   | 0.95   | 0.81          | 1.13    | 0.84   | 0.99   |
| O08795     | 19089      | Prkcsb    | 0.94                      | 0.97    | 0.97   |        |               | 0.88    |        | 0.94   |
| Q9WTX2     | 23992      | Prkra     | 0.87                      | 1.21    |        |        |               |         |        |        |
| A2AHG0     | 241638     | Prosapip1 |                           |         |        |        |               |         |        | 1.31   |
| Q9Z2Y8     | 114863     | Prosc     | 1.13                      | 0.96    | 0.93   | 0.86   | 1.34          | 0.93    | 1.01   | 0.91   |
| Q99KP6     | 28000      | Prpf19    | 0.96                      | 1.17    | 0.96   |        | 1.04          |         | 1.19   | 1.43   |
| Q99PV0     | 192159     | Prpf8     |                           |         |        | 1.02   |               | 1.16    |        |        |
| Q9D7G0     | 19139      | Prps1     |                           | 0.95    | 0.90   |        |               | 0.86    |        | 0.99   |
| Q8R574     | 212627     | Prpsap2   | 0.90                      | 1.23    | 0.89   |        | 0.61          | 0.88    |        | 1.62   |
| Q8BIW1     | 229589     | Prune     |                           |         |        | 1.30   |               |         | 1.14   |        |
| Q61207     | 19156      | Psap      |                           | 1.00    | 0.99   | 0.99   |               | 1.06    |        | 1.01   |
| Q99K85     | 107272     | Psat1     | 1.10                      | 1.03    | 0.94   | 0.88   | 1.43          | 1.23    | 1.40   | 1.06   |
| Q2PFD7     | 234353     | Psd3      | 0.74                      | 0.87    | 0.82   | 0.91   | 1.25          | 0.65    | 0.99   | 1.04   |
| Q99JF8     | 101739     | Psip1     |                           |         | 0.88   |        |               | 0.81    |        |        |
| Q9R1P4     | 26440      | Psm1      | 0.84                      | 0.99    | 0.98   | 0.91   | 1.45          | 0.93    | 0.90   | 1.01   |
| P49722     | 19166      | Psm2      | 0.95                      | 0.99    | 0.99   | 0.96   | 1.14          | 0.98    | 0.89   | 1.05   |
| O70435     | 19167      | Psm3      | 1.03                      | 0.96    | 0.92   | 0.83   | 1.47          | 0.97    | 0.85   | 0.95   |
| Q9R1P0     | 26441      | Psm4      |                           |         | 0.97   | 0.91   |               | 0.89    | 1.06   | 0.99   |
| Q9Z2U1     | 26442      | Psm5      | 0.95                      | 1.05    | 1.05   | 0.98   | 1.13          | 0.99    | 1.00   | 0.99   |
| Q9QUM9     | 26443      | Psm6      | 1.09                      | 1.13    | 1.01   | 0.85   | 1.17          | 1.00    | 0.85   | 0.98   |
| Q9Z2U0     | 26444      | Psm7      | 0.87                      | 0.95    | 0.95   | 0.87   | 1.23          | 0.97    | 0.81   | 0.98   |
| Q9CWH6     | 73677      | Psm8      |                           | 1.00    | 1.00   |        |               | 0.98    |        | 1.01   |
| O09061     | 19170      | Psm1      | 0.98                      | 1.08    | 1.14   | 0.94   | 1.15          | 0.97    | 0.89   | 0.96   |
| Q9R1P3     | 26445      | Psm2      | 1.12                      | 1.06    | 0.93   | 0.93   | 1.28          | 0.96    | 1.19   | 0.95   |
| Q9R1P1     | 26446      | Psm3      | 0.93                      | 0.95    | 0.97   | 0.98   | 1.16          | 0.97    | 0.82   | 0.98   |
| P99026     | 19172      | Psm4      | 0.97                      | 1.06    | 0.92   | 0.92   | 1.20          | 1.05    | 0.85   | 0.95   |
| O55234     | 19173      | Psm5      | 0.89                      | 1.01    | 1.00   | 0.94   | 1.20          | 1.05    | 0.87   | 0.92   |
| Q60692     | 19175      | Psm6      | 0.91                      |         |        |        |               | 0.94    | 0.86   | 0.93   |
| P70195     | 19177      | Psm7      | 0.83                      | 0.98    | 0.90   |        | 1.37          | 1.04    | 0.83   | 0.90   |
| P62192     | 19179      | Psm1      |                           |         | 2.29   | 1.16   |               |         | 0.97   | 1.63   |
| O88685     | 19182      | Psm3      | 1.45                      |         |        |        | 0.95          |         | 1.17   |        |
| P62196     | 19184      | Psm5      | 1.02                      |         | 1.25   |        | 0.83          | 1.14    |        | 1.32   |
| Q3TXS7     | 70247      | Psm1      | 1.06                      | 1.12    |        | 0.99   | 0.83          |         | 0.94   | 0.97   |
| Q8BG32     | 69077      | Psm11     | 0.93                      | 1.00    | 1.02   | 0.82   | 1.03          | 1.15    | 0.98   | 1.13   |

Supp. Table 1 (cont.)

| Uniprot_ID | Entrez_Gen | Symbol              | Developmental Myelination |         |        |        | Remyelination |         |        |        |
|------------|------------|---------------------|---------------------------|---------|--------|--------|---------------|---------|--------|--------|
|            |            |                     | Mut-w11                   | Mut-w12 | WT-w11 | WT-w12 | Mut-w11       | Mut-w12 | WT-w11 | WT-w12 |
| Q9D8W5     | 66997      | Psmc12              |                           |         |        | 1.23   |               |         |        |        |
| Q9WVJ2     | 23997      | Psmc13              | 1.26                      | 1.01    | 0.96   |        |               | 0.97    |        | 0.90   |
| O35593     | 59029      | Psmc14              | 1.17                      | 1.03    | 0.96   | 1.05   |               | 0.99    | 1.19   |        |
| Q8VDM4     | 21762      | Psmc2               | 1.06                      | 0.99    | 1.03   | 0.98   | 0.98          | 0.97    | 0.89   | 1.05   |
| P14685     | 22123      | Psmc3               |                           |         |        |        |               |         |        | 0.15   |
| O35226     | 19185      | Psmc4               |                           |         |        |        |               | 1.08    |        | 1.01   |
| P26516     | 17463      | Psmc7               | 1.39                      | 1.09    | 1.07   |        | 0.97          | 0.92    | 1.37   | 1.14   |
| Q9CX56     | 57296      | Psmc8               | 1.30                      |         | 1.52   |        |               | 0.92    | 1.19   | 0.90   |
| Q9CR00     | 67151      | Psmc9               |                           |         |        | 0.83   |               |         |        |        |
| P97371     | 19186      | Psme1               |                           | 1.04    | 1.06   | 1.44   |               | 1.02    | 1.35   | 0.98   |
| P97372     | 19188      | Psme2               | 0.99                      |         |        |        |               |         | 1.01   |        |
| Q8R326     | 66645      | Pspc1               | 1.11                      | 1.44    | 1.06   |        | 1.13          | 1.00    |        | 1.09   |
| Q99LS3     | 100678     | Psph                |                           |         |        |        |               | 1.17    |        |        |
| Q91Z31     | 56195      | Ptbp2               | 1.25                      |         |        |        |               |         |        |        |
| O09114     | 19215      | Ptgds               | 0.98                      |         | 1.29   |        |               | 0.90    | 0.75   | 0.97   |
| Q8VDQ1     | 77219      | Ptgr2               | 0.94                      | 0.86    | 0.91   | 1.09   |               | 0.95    | 1.23   | 0.87   |
| P34152     | 14083      | Ptk2 (Includes eg:1 |                           | 1.13    | 1.40   |        |               | 1.28    |        |        |
| Q9QVP9     | 19229      | Ptk2b (Incl         | 1.43                      | 1.11    | 1.26   | 1.29   | 1.30          | 0.97    | 1.04   | 1.02   |
| P26350     | 19231      | Ptma                | 0.84                      | 1.03    | 0.98   |        | 1.17          | 0.92    | 1.01   | 0.92   |
| Q9D0J8     | 69202      | Ptms                | 0.96                      | 0.98    | 1.08   | 1.08   | 1.13          | 1.13    | 0.95   | 1.08   |
| Q63739     | 19243      | Ptp4a1              |                           | 2.19    | 1.54   | 1.16   |               | 0.91    |        | 0.99   |
| O70274     | 19244      | Ptp4a2              | 0.86                      |         |        |        |               |         |        | 0.72   |
| Q8K2C9     | 57874      | Ptplad1             | 0.92                      | 1.01    |        | 0.78   |               | 0.82    | 1.17   | 3.07   |
| Q66GT5     | 66461      | Ptpmt1              | 0.93                      |         |        |        |               |         |        |        |
| P35235     | 19247      | Ptpn11              |                           | 1.02    | 0.90   |        | 0.94          |         |        | 1.19   |
| P54830     | 19259      | Ptpn5               |                           |         | 0.94   |        |               |         |        |        |
| O35239     | 56294      | Ptpn9               |                           |         |        |        |               | 1.14    |        |        |
| B0V2N1     | 19280      | Ptpns               | 0.96                      | 1.14    | 1.30   |        | 1.07          | 1.07    |        | 1.03   |
| Q8R2Y8     | 217057     | Ptrh2               | 1.01                      | 0.83    | 0.85   |        | 1.39          | 1.16    |        | 0.98   |
| P42669     | 19290      | Pura                | 1.14                      | 0.92    | 0.99   | 1.07   | 0.80          | 1.04    | 0.95   | 0.96   |
| O35295     | 19291      | Purb                | 1.21                      | 1.05    | 1.09   |        | 0.97          | 1.02    | 0.89   | 1.06   |
| P32848     | 19293      | Pvalb               | 0.74                      | 0.71    | 0.77   | 0.65   | 0.81          | 0.99    | 0.84   | 0.75   |
| Q922Q4     | 69051      | Pycr2               | 1.15                      | 1.00    | 1.13   | 1.18   | 0.78          | 0.88    |        | 1.00   |
| Q9DCC4     | 66194      | Pycrl               |                           |         |        |        |               | 1.41    |        |        |
| Q8CI94     | 110078     | Pygb                | 0.91                      | 0.96    | 0.89   | 0.93   | 0.86          | 0.97    | 0.92   | 0.93   |
| Q9WUB3     | 19309      | Pygm                | 0.87                      | 0.88    | 0.66   | 0.81   | 0.73          | 0.97    | 1.13   | 0.77   |
| Q8BVI4     | 110391     | Qdpr                | 0.80                      | 0.86    | 0.84   | 0.65   | 0.76          | 0.82    | 0.76   | 0.70   |
| P61027     | 19325      | Rab10               | 0.98                      | 0.99    | 1.01   | 0.95   | 0.94          | 1.17    |        | 1.13   |
| P46638     | 19326      | Rab11b              | 1.00                      | 1.00    | 1.05   | 1.04   | 1.09          | 0.98    | 0.96   | 1.00   |
| Q8R361     | 52055      | Rab11fip5           |                           |         | 0.90   |        |               | 1.57    |        | 0.93   |
| P35283     | 19328      | Rab12               |                           | 1.00    | 0.97   |        |               |         |        | 1.12   |
| Q91V41     | 68365      | Rab14               | 1.12                      | 1.04    | 1.05   | 1.09   | 1.17          | 1.04    | 1.07   | 1.04   |
| P35293     | 19330      | Rab18               | 1.10                      | 1.00    | 0.99   | 1.05   | 1.23          | 0.97    | 1.12   | 0.99   |
| P62821     | 19324      | Rab1a (Inc          | 0.97                      | 1.01    | 1.01   | 1.05   | 1.04          | 1.03    | 0.99   | 1.00   |
| Q9D1G1     | 76308      | Rab1b               | 1.05                      | 0.98    | 1.03   | 1.02   | 1.05          | 1.05    | 0.86   | 1.02   |
| P35282     | 216344     | Rab21               |                           | 1.28    | 0.97   |        |               | 0.95    | 1.14   | 1.05   |

Supp. Table 1 (cont.)

| Uniprot_ID | Entrez_Gen | Symbol     | Developmental Myelination |         |        |        | Remyelination |         |        |        |
|------------|------------|------------|---------------------------|---------|--------|--------|---------------|---------|--------|--------|
|            |            |            | Mut-w11                   | Mut-w12 | WT-w11 | WT-w12 | Mut-w11       | Mut-w12 | WT-w11 | WT-w12 |
| P35285     | 19334      | Rab22a     | 0.96                      |         | 0.83   |        | 1.30          | 1.39    | 1.34   |        |
| P35288     | 19335      | Rab23      | 0.79                      |         |        | 1.01   | 1.20          |         | 1.21   |        |
| P35290     | 19336      | Rab24      | 1.67                      | 0.93    | 1.08   | 1.10   | 1.36          | 1.24    | 1.85   | 0.86   |
| Q99P58     | 80718      | Rab27b     |                           |         |        |        |               | 1.14    |        |        |
| P53994     | 59021      | Rab2a      | 1.06                      | 1.00    | 0.92   | 1.16   | 1.11          | 0.96    | 0.96   | 0.99   |
| Q6PHN9     | 77407      | Rab35      | 0.94                      | 1.11    | 1.15   | 1.01   | 0.99          | 1.14    | 0.81   | 1.08   |
| Q8BHD0     | 270160     | Rab39a     | 0.90                      | 1.00    | 1.08   | 0.94   | 0.98          | 1.00    | 0.77   | 1.14   |
| Q8BHC1     | 67790      | Rab39b     |                           | 2.15    | 2.27   | 1.27   |               | 1.05    |        | 1.64   |
| P63011     | 19339      | Rab3a      | 0.94                      | 0.96    | 1.06   | 1.02   | 1.14          | 0.97    | 0.88   | 0.98   |
| Q9CZT8     | 69908      | Rab3b      | 1.00                      | 0.97    | 1.24   | 1.10   | 1.04          | 0.84    | 1.06   | 0.98   |
| P62823     | 67295      | Rab3c (Inc | 0.99                      | 1.07    | 1.20   | 1.08   | 1.09          | 1.11    | 1.05   | 0.99   |
| P35276     | 19340      | Rab3d      | 0.93                      | 0.94    | 0.95   | 0.89   | 1.05          | 0.89    | 0.84   | 0.91   |
| Q80UJ7     | 226407     | Rab3gap1   | 1.18                      | 0.93    | 0.87   | 0.92   | 0.91          | 2.11    | 1.24   | 0.98   |
| Q8BMG7     | 98732      | Rab3gap2   | 1.28                      |         |        | 0.79   | 0.77          |         | 1.15   | 0.84   |
| Q9CQD1     | 271457     | Rab5a      | 1.06                      | 0.99    | 1.04   | 1.07   | 1.00          | 1.04    | 1.05   | 0.95   |
| P61021     | 19344      | Rab5b      | 0.99                      | 1.03    | 1.00   | 0.94   | 0.91          | 1.02    | 0.99   | 0.95   |
| P35278     | 19345      | Rab5c      | 0.92                      | 1.06    | 1.05   | 1.03   | 1.03          | 1.05    | 0.98   | 1.12   |
| P35279     | 19346      | Rab6a      | 0.86                      | 1.39    | 0.85   |        | 0.92          | 1.09    | 1.02   | 0.95   |
| P61294     | 270192     | Rab6b      | 1.06                      | 1.02    | 0.98   | 1.07   | 0.90          | 0.99    | 0.92   | 0.99   |
| P51150     | 19349      | Rab7a      | 1.04                      | 1.07    | 1.05   | 1.02   | 1.14          | 1.09    | 0.94   | 0.99   |
| P55258     | 17274      | Rab8a      |                           | 1.29    | 0.94   | 0.90   | 0.84          | 1.21    | 0.87   | 1.08   |
| O35551     | 54189      | Rabep1     |                           | 0.96    |        |        |               | 1.29    |        |        |
| A2AWA9     | 227800     | Rabgap1    | 1.58                      |         |        | 1.48   | 1.36          |         | 1.74   |        |
| P63001     | 19353      | Rac1       | 0.85                      | 0.98    | 1.04   | 0.85   | 0.91          | 0.99    | 0.86   | 0.97   |
| P60764     | 170758     | Rac3       | 0.91                      |         |        | 1.30   | 1.23          |         |        |        |
| P54728     | 19359      | Rad23b     |                           |         | 1.20   |        |               |         |        |        |
| P63321     | 56044      | Rala       | 1.09                      | 0.94    | 1.04   | 0.93   | 1.02          | 0.92    | 0.99   | 0.87   |
| Q8BQZ4     | 228850     | Ralgapb    |                           |         | 1.07   |        |               |         |        |        |
| Q64012     | 19383      | Raly       |                           | 1.14    | 0.94   |        |               |         |        | 1.10   |
| P62827     | 19384      | Ran        | 0.91                      | 1.03    | 1.01   | 0.83   | 1.05          | 1.07    | 0.96   | 1.01   |
| P34022     | 19385      | Ranbp1     | 0.55                      | 1.03    | 0.91   | 4.32   | 4.23          | 1.03    | 3.59   | 0.96   |
| Q9CT10     | 71810      | Ranbp3     | 0.86                      | 1.06    | 0.90   |        | 1.05          | 1.30    | 1.05   | 0.97   |
| P62835     | 109905     | Rap1a      |                           | 0.78    | 0.88   |        | 1.11          |         |        |        |
| Q99JI6     | 215449     | Rap1b      | 0.94                      | 0.91    | 0.97   | 0.96   | 1.01          | 0.95    | 0.92   | 0.90   |
| Q5SVL6     | 380711     | Rap1gap2   | 1.10                      | 0.94    | 0.97   |        | 1.04          | 1.06    | 1.01   | 1.13   |
| Q80ZJ1     | 76108      | Rap2a      | 1.17                      | 0.98    | 1.14   | 1.21   | 0.95          | 1.06    | 1.19   | 1.04   |
| P61226     | 74012      | Rap2b      | 0.98                      | 1.01    | 1.04   | 1.08   | 1.15          | 1.02    | 1.03   | 1.02   |
| Q8CHG7     | 76089      | Rapgef2    | 1.36                      | 1.09    | 1.29   | 0.95   | 0.87          | 1.22    | 1.21   | 1.04   |
| Q9EQZ6     | 56508      | Rapgef4    | 1.37                      | 1.16    |        | 1.00   |               | 1.16    |        |        |
| Q9D0I9     | 104458     | Rars       |                           |         |        |        | 0.95          |         |        |        |
| Q9Z268     | 19415      | Rasa1      | 1.15                      | 1.14    | 1.23   | 1.01   | 1.09          | 1.08    | 0.89   | 1.05   |
| Q9QUG9     | 19395      | Rasgrp2    |                           |         |        |        |               | 1.00    |        |        |
| O88851     | 26450      | Rbbp9      | 1.05                      | 0.88    | 0.91   |        | 1.03          | 1.01    |        | 0.80   |
| Q8VH51     | 170791     | Rbm39      |                           |         |        |        |               | 1.11    |        |        |
| Q9CWZ3     | 60365      | Rbm8a      |                           | 1.12    |        |        |               |         |        |        |
| O35479     | 19656      | Rbmx11     |                           | 1.53    | 1.32   |        |               | 1.05    |        | 1.27   |

Supp. Table 1 (cont.)

| Uniprot_ID | Entrez_Gen | Symbol              | Developmental Myelination |         |        |        | Remyelination |         |        |        |
|------------|------------|---------------------|---------------------------|---------|--------|--------|---------------|---------|--------|--------|
|            |            |                     | Mut-w11                   | Mut-w12 | WT-w11 | WT-w12 | Mut-w11       | Mut-w12 | WT-w11 | WT-w12 |
| P62878     | 56438      | Rbx1                | 1.08                      | 0.95    | 0.98   | 1.12   | 0.82          | 0.92    |        | 0.89   |
| Q8BP92     | 26611      | Rcn2 (Inclu         | 1.11                      |         |        |        |               |         |        |        |
| P26043     | 19684      | Rdx                 | 1.03                      | 1.03    | 0.85   |        | 1.60          | 1.00    | 1.20   | 1.10   |
| Q60870     | 13476      | Reep5               |                           | 0.88    | 0.88   | 0.85   | 1.47          | 0.65    |        | 1.02   |
| Q9CQE5     | 67865      | Rgs10               | 1.51                      | 1.02    | 1.11   | 1.17   | 1.50          | 0.75    | 1.29   | 0.85   |
| Q9Z2H2     | 50779      | Rgs6                |                           |         |        | 0.93   |               |         | 1.04   |        |
| O54829     | 24012      | Rgs7                | 1.07                      | 1.05    | 1.20   | 1.09   | 1.07          | 0.86    | 0.99   | 1.09   |
| Q921J2     | 19744      | Rheb (Mou           | 1.00                      | 1.06    | 1.06   | 1.03   | 1.26          | 0.82    |        | 0.96   |
| Q9QUI0     | 11848      | Rhoa                | 0.99                      | 0.94    | 0.95   | 1.22   | 1.06          | 1.03    | 1.13   | 0.87   |
| P84096     | 56212      | Rhog                | 0.74                      | 0.85    | 0.77   | 0.79   | 0.56          | 0.73    | 0.88   | 0.63   |
| Q8BG51     | 59040      | Rhot1               | 1.13                      | 1.12    | 0.94   |        |               | 1.16    |        | 1.14   |
| Q921Q7     | 225870     | Rin1                | 1.33                      | 0.98    | 1.17   |        | 1.00          |         | 1.15   | 1.18   |
| Q8BZ36     | 72772      | Rint1               | 0.05                      |         |        |        |               |         |        |        |
| Q8VCT3     | 215615     | Rnpep               | 1.25                      | 1.01    | 1.03   | 1.20   | 0.96          | 1.09    | 1.09   | 1.06   |
| P70336     | 19878      | Rock2               | 1.07                      | 0.95    | 0.95   | 1.02   | 1.08          | 1.00    | 0.95   | 0.98   |
| Q3TDK6     | 66049      | Rogdi               | 1.30                      |         |        | 1.14   | 1.05          | 0.91    | 1.62   | 1.27   |
| P47708     | 19894      | Rph3a               | 3.07                      | 0.91    | 1.11   | 0.26   | 3.21          | 1.04    | 3.50   | 1.06   |
| Q6Z WV3    | 110954     | Rpl10               | 1.24                      | 0.99    | 1.04   |        | 0.93          | 1.19    | 1.07   | 1.03   |
| P53026     | 19896      | Rpl10a              | 1.18                      | 1.02    | 0.99   | 1.24   | 1.00          | 1.03    | 1.09   | 0.95   |
| Q9CXW4     | 67025      | Rpl11               | 1.16                      | 1.04    | 1.04   | 1.09   | 0.88          | 1.04    | 1.05   | 1.02   |
| P35979     | 269261     | Rpl12               |                           | 0.97    | 1.00   | 1.02   |               | 1.08    |        | 1.03   |
| P19253     | 22121      | Rpl13a              |                           | 1.04    | 1.10   | 0.88   |               | 1.13    |        | 1.07   |
| Q9CR57     | 67115      | Rpl14               |                           | 1.03    | 1.12   | 1.13   |               | 1.23    |        | 1.16   |
| Q9CZM2     | 66480      | Rpl15               | 1.02                      | 0.98    | 1.00   | 1.58   | 0.89          | 0.99    | 0.97   | 0.97   |
| Q9CPR4     | 319195     | Rpl17               | 1.00                      | 1.19    | 1.08   | 0.78   | 0.87          | 1.17    | 1.11   | 1.03   |
| P35980     | 19899      | Rpl18               | 1.05                      | 1.06    | 1.00   | 0.99   | 0.84          | 1.14    | 1.10   | 1.03   |
| P62717     | 76808      | Rpl18a              |                           | 1.13    | 1.14   | 1.15   |               | 1.17    |        | 1.07   |
| P84099     | 19921      | Rpl19               |                           | 0.94    | 0.80   |        |               | 0.91    |        | 0.91   |
| O09167     | 19933      | Rpl21 (Incl         | 1.25                      | 1.01    | 0.93   | 1.03   | 0.82          | 1.25    | 0.91   | 0.96   |
| P67984     | 19934      | Rpl22               |                           | 1.05    | 1.01   |        |               | 0.95    |        | 1.05   |
| Q9D7S7     | 68028      | Rpl2211             |                           |         |        | 1.00   |               | 0.87    |        | 0.99   |
| P62830     | 65019      | Rpl23               |                           | 1.01    | 0.88   | 1.22   | 0.81          | 1.10    |        | 1.01   |
| P62751     | 100043755  | Rpl23a              | 1.47                      | 0.97    | 0.95   | 1.25   | 1.67          | 1.03    | 1.38   | 0.95   |
| Q8BP67     | 68193      | Rpl24               | 1.18                      | 1.15    | 1.00   | 1.21   | 0.66          | 0.89    |        | 0.95   |
| P61255     | 19941      | Rpl26               | 0.97                      | 1.16    | 0.95   | 0.98   |               | 1.24    | 0.89   | 1.10   |
| P61358     | 19942      | Rpl27               | 0.94                      |         | 1.27   | 1.24   | 1.16          | 0.94    | 1.01   | 0.93   |
| P14115     | 26451      | Rpl27a              | 1.16                      |         | 0.78   | 0.85   |               | 0.90    | 1.11   | 0.96   |
| P41105     | 19943      | Rpl28               | 0.99                      | 1.05    | 1.45   |        | 0.81          | 1.14    | 1.14   | 1.05   |
| P47915     | 383770 666 | Rpl29 (Includes Otl |                           | 1.15    | 0.99   |        |               | 1.06    | 1.40   | 1.12   |
| P62889     | 19946 666  | Rpl30               |                           | 0.96    | 1.12   | 1.28   | 1.19          | 1.07    | 0.78   | 0.99   |
| P62900     | 114641 10  | Rpl31               | 0.96                      | 0.99    | 0.97   | 1.07   | 0.90          | 0.98    | 1.12   | 1.00   |
| P62911     | 19951      | Rpl32               | 0.97                      | 0.94    | 0.90   |        |               | 1.16    |        | 0.97   |
| Q9D1R9     | 100043876  | Rpl34               |                           |         | 1.07   | 1.14   | 0.79          | 1.00    |        | 0.99   |
| Q6Z WV7    | 66489      | Rpl35               | 1.14                      | 0.95    | 1.13   | 1.02   | 1.18          | 1.03    | 1.00   | 1.05   |
| P47964     | 54217      | Rpl36               |                           | 1.02    |        | 1.31   | 1.12          | 1.08    | 0.97   |        |
| Q9JJI8     | 67671      | Rpl38               | 1.01                      | 0.96    | 1.05   | 1.02   | 0.97          | 1.01    | 1.00   | 1.17   |

Supp. Table 1 (cont.)

| Uniprot ID | Entrez Gene | Symbol      | Developmental Myelination |         |        |        | Remyelination |         |        |        |
|------------|-------------|-------------|---------------------------|---------|--------|--------|---------------|---------|--------|--------|
|            |             |             | Mut-w11                   | Mut-w12 | WT-w11 | WT-w12 | Mut-w11       | Mut-w12 | WT-w11 | WT-w12 |
| Q9D8E6     | 67891       | Rpl4        |                           | 1.35    | 1.03   |        |               | 1.10    |        | 1.10   |
| P47962     | 1.01E+08    | Rpl5        | 0.98                      |         |        | 0.86   | 1.04          | 0.94    | 0.99   | 1.11   |
| P47911     | 432502 19   | Rpl6        | 1.20                      | 0.99    | 1.13   |        |               | 1.21    |        | 1.11   |
| P14148     | 19989       | Rpl7        | 1.16                      | 1.01    | 0.99   | 1.00   | 0.80          | 1.08    | 1.04   | 1.06   |
| P12970     | 27176       | Rpl7a       | 1.18                      | 0.99    | 0.98   | 1.06   | 1.11          | 1.04    | 1.04   | 1.03   |
| P62918     | 26961       | Rpl8        | 1.24                      | 1.13    | 1.07   | 1.08   | 1.34          | 1.14    | 0.98   | 1.19   |
| P51410     | 20005       | Rpl9        | 1.00                      | 1.05    |        | 1.05   | 0.77          | 1.17    | 0.99   | 0.89   |
| P14869     | 11837       | Rplp0       | 1.47                      | 0.97    | 0.98   | 1.46   | 1.59          | 1.00    | 1.44   | 1.03   |
| P47955     | 56040       | Rplp1       | 3.42                      | 1.01    | 0.96   |        | 2.13          | 0.96    | 0.48   | 0.99   |
| P99027     | 67186       | Rplp2       | 1.84                      | 1.07    | 1.00   | 1.83   | 1.78          | 1.04    |        | 1.06   |
| Q91YQ5     | 103963      | Rpn1        |                           | 0.93    | 1.07   |        | 1.04          | 1.20    | 0.98   | 1.01   |
| P63325     | 67097       | Rps10       | 1.05                      | 1.06    | 0.95   | 0.97   | 1.17          | 1.06    | 1.21   | 1.06   |
| P62281     | 27207       | Rps11       | 1.08                      | 0.94    | 0.92   | 1.05   | 0.71          | 1.03    |        | 0.98   |
| P63323     | 20042       | Rps12       | 1.00                      | 0.91    | 1.20   |        | 0.87          | 1.05    | 0.85   | 1.00   |
| P62301     | 68052       | Rps13       | 1.07                      | 1.08    | 1.06   | 0.84   | 1.00          | 0.98    | 1.08   | 1.02   |
| P62264     | 20044       | Rps14       | 1.30                      | 1.44    | 0.93   | 1.10   | 1.00          | 0.95    | 1.30   |        |
| P62843     | 20054       | Rps15       | 0.97                      | 1.01    | 1.04   |        |               | 0.95    | 1.01   | 1.14   |
| P62245     | 267019      | Rps15a      | 1.07                      | 0.97    | 0.99   | 1.11   | 0.93          | 1.02    | 0.92   | 1.02   |
| P14131     | 20055       | Rps16       | 0.87                      | 1.12    | 0.95   | 1.05   | 0.79          | 1.00    | 1.02   | 1.04   |
| P63276     | 20068       | Rps17       | 1.11                      | 0.99    | 0.95   | 1.15   | 0.92          | 0.99    | 1.09   | 1.01   |
| P62270     | 20084       | Rps18       | 1.15                      | 0.98    | 1.04   | 0.99   | 0.83          | 0.98    | 0.92   | 1.09   |
| Q9CZX8     | 20085       | Rps19       | 0.94                      | 0.99    | 0.96   | 1.04   | 1.00          | 0.93    | 0.91   | 1.05   |
| P25444     | 16898       | Rps2        | 1.02                      | 1.12    | 0.97   | 0.95   | 0.93          | 1.08    | 0.88   | 0.97   |
| P60867     | 67427       | Rps20       | 1.34                      | 1.03    | 0.94   | 1.01   | 0.85          | 0.97    | 0.88   | 1.07   |
| Q9CQR2     | 66481       | Rps21       |                           |         | 0.97   |        |               | 1.08    |        |        |
| P62267     | 66475       | Rps23       | 1.08                      | 1.01    | 1.04   | 1.09   | 1.00          | 1.12    | 0.81   | 1.06   |
| P62849     | 20088       | Rps24       | 0.95                      | 0.99    | 0.97   | 1.13   | 0.82          | 0.95    | 0.96   | 1.04   |
| P62852     | 75617       | Rps25       | 1.00                      | 1.08    | 1.35   | 1.01   |               | 1.42    | 0.84   | 1.01   |
| P62855     | 27370       | Rps26       | 1.19                      | 1.10    | 1.42   | 1.53   | 1.04          | 1.21    | 1.19   | 1.30   |
| Q6ZWU9     | 57294 100   | Rps27       | 1.47                      | 1.06    | 1.14   | 1.08   |               | 1.04    | 0.88   | 0.99   |
| P62983     | 78294       | Rps27a      | 0.99                      | 1.07    | 0.95   | 0.98   | 1.12          | 1.04    | 1.09   | 1.13   |
| P62858     | 54127       | Rps28       |                           |         |        |        | 1.01          |         |        |        |
| P62274     | 20090       | Rps29       |                           | 1.05    | 1.05   |        | 0.84          | 0.96    |        |        |
| P62908     | 27050       | Rps3        | 1.00                      | 0.95    | 1.06   | 1.05   | 0.93          | 1.03    | 1.00   | 1.09   |
| P97351     | 20091       | Rps3a       | 1.21                      | 1.03    | 1.00   | 1.06   | 1.24          | 0.95    | 0.97   | 0.95   |
| P62702     | 20102       | Rps4x       | 1.26                      | 1.04    | 0.98   | 1.09   | 1.02          | 1.13    | 1.11   | 1.01   |
| P97461     | 20103       | Rps5        | 1.31                      |         |        |        | 1.39          |         | 1.19   |        |
| P62754     | 20104 667   | Rps6        | 0.82                      | 1.13    | 1.18   | 1.22   | 1.19          | 0.85    | 1.05   | 0.99   |
| P62082     | 20115       | Rps7        | 1.06                      | 1.07    | 1.14   | 1.14   | 0.87          | 1.13    | 1.10   | 1.04   |
| P62242     | 20116 100   | Rps8        | 1.04                      | 1.31    | 1.11   | 1.05   | 0.83          | 1.15    | 0.91   | 1.09   |
| Q6ZWN5     | 76846       | Rps9        | 1.01                      | 1.08    | 0.99   | 1.04   | 0.89          | 1.14    | 1.05   | 0.95   |
| P14206     | 16785       | Rpsa        | 1.07                      | 1.07    | 1.03   | 0.88   | 1.00          | 1.06    | 0.93   | 1.04   |
| P62071     | 66922       | Rras2       |                           |         | 1.08   |        |               |         |        |        |
| Q8K0T0     | 104001      | Rtn1        | 2.00                      | 0.95    | 1.00   | 2.15   | 1.78          | 0.96    | 1.93   | 0.95   |
| Q9ES97     | 20168       | Rtn3        | 1.35                      | 1.03    | 1.06   | 1.30   | 1.19          | 1.00    | 1.36   | 1.02   |
| Q99P72     | 68585       | Rtn4 (Inclu | 1.72                      | 1.16    | 1.09   | 1.09   | 1.02          | 1.10    | 1.92   | 1.09   |

Supp. Table 1 (cont.)

| Uniprot_ID | Entrez_Gen | Symbol      | Developmental Myelination |         |        |        | Remyelination |         |        |        |
|------------|------------|-------------|---------------------------|---------|--------|--------|---------------|---------|--------|--------|
|            |            |             | Mut-w11                   | Mut-w12 | WT-w11 | WT-w12 | Mut-w11       | Mut-w12 | WT-w11 | WT-w12 |
| Q9D394     | 52822      | Rufy3       | 1.01                      | 0.93    | 0.86   |        | 0.98          | 0.84    | 1.30   | 0.96   |
| P56565     | 20193      | S100a1      |                           | 0.94    | 0.96   |        |               | 0.90    | 0.80   | 1.12   |
| P97352     | 20196      | S100a13     |                           | 0.93    | 1.05   |        |               | 0.90    |        |        |
| P63084     | 20199      | S100a5      |                           | 29.35   |        |        |               |         |        |        |
| Q9JLC8     | 50720      | Sacs        |                           | 0.92    |        |        |               | 0.68    |        |        |
| Q9R1T2     | 56459      | Sae1        |                           |         |        |        |               | 0.96    |        |        |
| P36536     | 20224      | Sar1a       | 1.07                      | 1.11    | 1.08   | 0.83   | 1.15          | 1.09    | 1.06   | 1.07   |
| Q9CQC9     | 66397      | Sar1b       | 0.92                      | 1.07    | 1.21   |        | 1.06          | 0.89    | 1.19   | 0.98   |
| Q9D1J3     | 66118      | Sarnp       |                           |         |        | 1.15   |               |         |        |        |
| P26638     | 20226      | Sars        | 1.07                      | 1.06    | 0.97   | 1.04   | 1.20          | 1.06    | 1.00   | 1.01   |
| Q6ZPE2     | 77980      | Sbf1        | 1.18                      | 1.12    | 1.10   | 1.09   |               | 1.36    | 1.07   | 1.05   |
| Q8K021     | 107767     | Scamp1      | 1.16                      | 0.87    | 1.07   | 1.13   | 1.15          | 1.13    | 1.10   | 1.07   |
| Q9JKD3     | 56807      | Scamp5      |                           | 1.02    | 1.12   | 1.03   | 1.13          | 0.90    | 0.94   | 1.09   |
| Q8R127     | 109232     | Sccpdh      |                           |         |        |        |               |         | 1.33   |        |
| Q8BRF7     | 76983      | Scfd1       | 1.39                      |         |        | 1.57   | 0.69          |         |        |        |
| Q03517     | 20254      | Scg2        |                           | 1.05    | 0.59   |        |               | 0.65    |        | 0.66   |
| Q56A07     | 72821      | Scn2b       | 1.20                      | 1.14    | 1.21   |        | 1.13          | 1.12    | 0.85   | 1.13   |
| Q9WTU3     | 20273      | Scn8a       | 1.24                      | 0.96    | 1.12   | 0.73   | 0.89          | 1.04    |        | 0.92   |
| Q62205     | 20274      | Scn9a       | 1.04                      | 0.98    | 1.43   | 1.04   | 1.00          | 1.33    | 1.30   | 1.05   |
| Q78YZ6     | 56367      | Scoc        |                           | 0.88    | 0.94   |        |               | 0.91    |        | 0.88   |
| P32020     | 20280      | Scp2        | 1.24                      | 1.04    | 0.95   | 1.08   | 1.01          | 0.92    |        | 0.99   |
| Q9CZC8     | 69938      | Scrn1       | 1.01                      | 0.93    |        | 0.92   | 0.90          | 0.82    | 1.14   | 0.77   |
| Q8CFE4     | 213326     | Scyl2       |                           |         |        |        |               |         |        | 1.00   |
| Q8K2B3     | 66945      | Sdha (Inclu | 1.15                      | 1.04    | 0.95   | 1.04   | 1.18          | 1.03    | 1.03   | 0.99   |
| Q9CQA3     | 67680      | Sdhb        | 1.07                      | 1.06    | 0.97   | 1.01   | 1.06          | 0.97    | 1.12   | 0.95   |
| Q9CZB0     | 66052      | Sdhc        | 1.46                      | 0.82    |        | 0.86   | 0.90          | 1.10    | 1.04   |        |
| Q63918     | 20324      | Sdpr        |                           |         |        |        |               | 0.92    |        |        |
| O08547     | 20333      | Sec22b      | 1.84                      | 1.17    | 1.20   | 1.20   | 1.41          | 1.11    | 1.41   | 1.15   |
| Q01405     | 20334      | Sec23a      | 0.97                      | 1.12    |        |        | 1.26          | 0.87    |        |        |
| Q3UPL0     | 69162      | Sec31a      | 1.29                      | 0.99    | 1.10   | 1.40   | 1.16          | 1.17    | 2.02   | 0.91   |
| Q9CQS8     | 66212      | Sec61b      |                           | 1.05    | 1.00   |        |               | 1.03    |        |        |
| Q8C650     | 103080     | Sept10      |                           |         |        |        |               | 1.13    |        |        |
| Q8C1B7     | 52398      | Sept11      | 0.94                      | 0.89    | 1.00   | 1.18   | 1.11          | 1.03    | 0.91   | 0.98   |
| Q9Z1S5     | 24050      | Sept3       | 0.97                      | 0.97    | 0.96   | 1.09   | 0.88          | 1.03    | 0.94   | 0.98   |
| P28661     | 18952      | Sept4       | 1.17                      |         |        |        |               |         | 1.18   | 0.84   |
| Q9Z2Q6     | 18951      | Sept5       | 1.10                      | 1.01    | 1.01   | 1.09   | 0.98          | 1.00    | 0.97   | 0.96   |
| Q9R1T4     | 56526      | Sept6       | 1.00                      | 1.01    | 1.10   | 1.02   | 1.16          | 1.10    | 0.97   | 1.08   |
| O55131     | 235072     | Sept7       | 1.06                      | 0.95    | 1.02   | 1.07   | 1.00          | 1.00    | 0.88   | 0.96   |
| Q8CHH9     | 20362      | Sept8       | 1.15                      | 0.98    | 1.01   | 1.53   | 0.84          | 1.04    | 1.09   | 1.00   |
| Q80UG5     | 53860      | Sept9       | 1.47                      | 1.21    | 1.25   | 1.45   | 0.96          | 1.08    | 1.20   | 1.34   |
| P63300     | 20364      | Sepw1       |                           |         |        |        |               | 1.21    |        |        |
| Q9CY58     | 66870      | Serbp1      | 1.28                      | 0.97    | 0.90   | 2.86   | 1.41          |         | 1.64   | 1.15   |
| P07758     | 20703 207  | Serpina1    | 0.77                      |         | 1.71   | 0.58   |               |         | 0.18   |        |
| Q8BYY9     | 238395 27  | Serpina3a   |                           |         |        |        |               |         |        | 1.01   |
| Q60854     | 20719      | Serpib6     |                           |         |        | 1.01   |               |         | 0.91   |        |
| Q9EQU5     | 56086      | Set         | 0.98                      | 1.09    | 1.08   |        | 4.12          | 1.13    | 1.08   | 1.08   |

Supp. Table 1 (cont.)

| Uniprot ID | Entrez Gene | Symbol    | Developmental Myelination |         |        |        | Remyelination |         |        |        |
|------------|-------------|-----------|---------------------------|---------|--------|--------|---------------|---------|--------|--------|
|            |             |           | Mut-w11                   | Mut-w12 | WT-w11 | WT-w12 | Mut-w11       | Mut-w12 | WT-w11 | WT-w12 |
| Q6P1D5     | 56747       | Sez6l     | 1.15                      | 0.84    |        |        |               | 0.97    | 1.04   | 1.05   |
| Q8K4Z5     | 67465       | Sf3a1     |                           |         |        |        | 1.42          |         | 1.98   |        |
| Q99NB9     | 81898       | Sf3b1     | 1.20                      |         |        | 1.20   | 1.32          | 1.09    | 1.26   |        |
| P59708     | 66055       | Sf3b14    |                           |         |        |        |               | 1.22    |        |        |
| Q923D4     | 66125       | Sf3b5     |                           |         |        |        | 0.79          | 1.09    |        |        |
| O70456     | 55948       | Sfn       | 0.89                      | 1.01    | 0.96   | 0.93   | 0.83          | 1.01    | 0.74   | 0.94   |
| Q8VIJ6     | 71514       | Sfpq      | 1.06                      | 1.04    | 1.01   | 1.15   | 1.03          | 1.03    | 1.05   | 0.99   |
| Q99JR1     | 14057       | Sfxn1     | 1.45                      | 0.93    |        | 0.88   | 0.86          | 1.05    | 1.23   | 0.93   |
| Q91V61     | 94280       | Sfxn3     | 1.17                      | 1.12    | 1.32   | 1.07   | 1.22          | 1.40    | 1.06   | 1.26   |
| Q925N0     | 94282       | Sfxn5     | 0.99                      | 0.93    | 0.90   | 0.96   | 0.83          | 1.16    | 1.30   | 1.12   |
| Q8VD37     | 73094       | Sgip1     | 1.18                      | 0.86    | 0.95   | 1.13   | 1.08          | 0.86    | 1.26   | 1.00   |
| Q8BPQ7     | 52850       | Sgsm1     |                           | 1.06    | 0.96   | 1.60   | 1.12          |         |        | 0.87   |
| Q8BJU0     | 52551       | Sgta      |                           | 1.16    | 1.04   |        |               | 0.95    |        | 0.99   |
| Q8VD33     | 218544      | Sgtb      | 1.52                      | 1.02    | 1.05   |        |               | 1.00    | 0.90   |        |
| Q9JJU8     | 56726       | Sh3bgrl   | 1.05                      | 0.91    | 0.98   | 1.03   | 1.12          | 0.84    |        | 0.92   |
| Q8BG73     | 212531      | Sh3bgrl2  | 0.78                      | 1.04    | 1.70   | 1.28   | 0.83          |         | 0.86   |        |
| Q91VW3     | 73723       | Sh3bgrl3  | 0.69                      | 0.92    | 1.03   |        | 0.47          | 0.84    | 0.80   | 1.16   |
| Q62420     | 20404       | Sh3gl2    | 1.13                      | 1.12    | 1.25   | 1.16   | 1.13          | 1.12    | 1.06   | 1.10   |
| Q8R3V5     | 227700      | Sh3glb2   |                           | 1.08    | 1.33   |        |               |         |        | 1.06   |
| Q6P4S6     | 70661       | Sik3      |                           | 0.95    |        |        |               |         | 1.61   |        |
| P97797     | 19261       | Sirpa     | 1.74                      | 0.98    | 1.27   | 1.24   | 2.22          | 1.11    | 1.17   | 1.10   |
| Q8VDQ8     | 64383       | Sirt2     | 0.97                      | 0.81    | 0.81   | 0.91   | 0.86          | 0.88    | 1.01   | 0.73   |
| Q9WTX5     | 21402       | Skp1/Skp1 | 1.06                      | 1.03    | 1.01   | 0.99   | 1.11          | 0.96    | 1.05   | 1.04   |
| P55012     | 20496       | Slc12a2   |                           | 1.47    |        |        |               | 1.31    |        |        |
| Q91V14     | 57138       | Slc12a5   | 1.10                      | 1.07    | 1.17   | 0.88   | 1.01          | 1.10    | 0.95   | 0.96   |
| P53986     | 20501       | Slc16a1   |                           |         |        | 0.63   |               |         |        |        |
| Q3TXX4     | 72961       | Slc17a7   | 1.11                      | 0.97    | 1.21   | 1.32   | 1.05          | 1.00    | 1.31   | 0.99   |
| P43006     | 20511       | Slc1a2    | 0.83                      | 0.92    | 1.06   | 0.65   | 0.77          | 1.00    | 0.87   | 0.94   |
| P56564     | 20512       | Slc1a3    | 1.04                      | 0.86    | 0.94   | 1.03   | 0.90          |         | 0.81   | 1.02   |
| Q9CR62     | 67863       | Slc25a11  | 1.05                      | 0.97    | 0.98   | 0.88   | 0.92          | 1.09    | 1.08   | 0.94   |
| Q8BH59     | 78830       | Slc25a12  | 0.94                      | 0.97    | 0.94   | 0.86   | 0.84          | 1.07    | 1.00   | 0.94   |
| Q9QXX4     | 50799       | Slc25a13  | 1.06                      | 0.89    | 0.97   | 0.97   | 0.92          | 0.73    | 0.92   | 0.98   |
| Q9DB41     | 71803       | Slc25a18  |                           |         |        |        | 0.49          |         |        |        |
| Q9D6M3     | 68267       | Slc25a22  | 1.14                      | 1.07    | 1.23   | 1.13   | 0.97          | 1.18    | 0.98   | 1.12   |
| Q6GQS1     | 66972       | Slc25a23  |                           |         | 1.21   |        |               |         |        | 0.05   |
| Q8VEM8     | 18674       | Slc25a3   | 0.99                      | 0.93    | 0.96   | 1.05   | 1.03          | 0.98    | 1.28   | 0.92   |
| Q3V132     | 73333       | Slc25a31  |                           | 0.89    | 0.94   |        |               | 0.91    |        | 0.89   |
| P48962     | 11739       | Slc25a4   | 0.97                      | 0.91    | 0.96   | 0.93   | 0.86          | 0.93    | 1.21   | 0.94   |
| P51881     | 11740       | Slc25a6   | 1.04                      | 0.94    | 0.98   | 1.02   | 0.98          | 0.97    | 1.44   | 0.95   |
| P17809     | 20525       | Slc2a1    | 1.17                      |         |        | 0.65   | 0.84          |         |        |        |
| P32037     | 20527       | Slc2a3    | 0.73                      | 1.05    | 0.92   | 1.12   | 0.81          | 0.94    | 1.09   | 0.96   |
| O35633     | 22348       | Slc32a1   | 1.03                      | 1.31    | 0.78   | 0.75   |               | 0.48    | 1.42   | 0.90   |
| P10852     | 17254       | Slc3a2    | 1.15                      | 1.11    | 0.98   | 0.97   | 1.28          | 1.23    | 1.19   | 1.24   |
| Q5DTL9     | 94229       | Slc4a10   | 1.21                      | 1.02    | 1.26   | 1.08   | 1.13          | 1.25    | 1.13   | 1.03   |
| O88343     | 54403       | Slc4a4    | 0.92                      | 1.02    | 0.82   | 0.70   | 0.88          | 1.10    | 1.46   | 0.96   |
| P31648     | 232333      | Slc6a1    | 0.93                      | 0.95    | 0.94   | 0.74   | 0.87          | 1.00    | 1.16   | 0.91   |



Supp. Table 1 (cont.)

| Uniprot_ID | Entrez_Gen | Symbol      | Developmental Myelination |         |        |        | Remyelination |         |        |        |
|------------|------------|-------------|---------------------------|---------|--------|--------|---------------|---------|--------|--------|
|            |            |             | Mut-w11                   | Mut-w12 | WT-w11 | WT-w12 | Mut-w11       | Mut-w12 | WT-w11 | WT-w12 |
| P31650     | 243616     | Slc6a11     | 0.68                      | 0.94    | 0.56   |        | 0.55          | 0.70    | 1.68   | 0.71   |
| P70414     | 20541      | Slc8a1      | 0.84                      |         | 0.97   | 0.84   | 0.88          | 1.07    | 0.83   | 0.95   |
| P70441     | 26941      | Slc9a3R1    | 2.03                      | 1.15    | 1.12   | 1.73   |               | 1.09    | 2.03   | 1.00   |
| O54988     | 20874      | Slk         | 1.33                      | 1.00    | 0.89   | 1.34   | 1.10          | 0.93    | 1.20   | 0.91   |
| Q3TKT4     | 20586      | Smarca4     |                           |         | 0.86   |        |               |         |        |        |
| Q9CU62     | 24061      | Smc1a       |                           |         |        |        |               |         | 0.80   |        |
| P60879     | 20614      | Snap25      | 1.21                      | 1.09    | 1.20   | 1.28   | 1.38          | 1.37    | 1.16   | 1.16   |
| Q8R570     | 67826      | Snap47      | 1.16                      |         |        |        | 0.61          | 1.03    | 0.86   | 0.93   |
| Q61548     | 20616      | Snap91      | 1.47                      | 1.02    | 1.03   | 1.48   | 1.21          | 0.94    | 1.39   | 0.99   |
| O55042     | 20617      | Snca        | 0.41                      | 0.37    | 0.49   | 0.61   | 0.47          | 0.44    | 0.10   | 0.32   |
| Q91ZZ3     | 104069     | Sncb        | 1.09                      | 1.19    | 1.10   | 1.16   | 1.03          | 1.09    | 1.02   | 1.20   |
| Q9Z0F7     | 20618      | Sncg        | 0.75                      | 1.01    | 0.65   | 0.71   | 0.81          | 1.15    | 1.08   | 0.66   |
| Q78PY7     | 56463      | Snd1        | 0.95                      | 0.98    | 0.93   | 0.92   | 1.31          | 1.06    | 0.97   | 1.03   |
| P62315     | 20641      | Snrpd1      | 1.03                      |         |        | 0.86   |               |         |        |        |
| P62317     | 107686     | Snrpd2      | 1.02                      | 1.04    | 0.89   | 1.19   | 0.95          | 1.00    | 0.87   | 1.04   |
| P62305     | 20643      | Snrpe       |                           |         |        |        |               | 1.15    | 1.06   |        |
| Q9WV80     | 56440      | Snx1        |                           | 1.08    | 0.93   |        | 0.96          | 1.14    |        | 1.06   |
| O70493     | 55988      | Snx12       | 0.96                      | 1.02    | 1.07   | 1.03   | 1.22          | 1.01    | 1.06   | 1.03   |
| Q9CWX8     | 67804      | Snx2        | 1.16                      | 1.22    | 1.05   |        | 0.63          | 0.99    |        | 1.24   |
| O70492     | 54198      | Snx3        |                           | 0.95    | 0.91   | 0.81   |               | 0.95    |        |        |
| P08228     | 20655      | Sod1        | 0.74                      | 0.91    | 0.84   | 0.81   | 0.99          | 0.83    | 0.84   | 0.90   |
| P09671     | 20656      | Sod2        | 0.97                      | 1.16    | 1.00   | 0.98   | 1.12          | 1.08    | 1.09   | 1.03   |
| Q6NZL0     | 67412      | Soga3       |                           |         |        | 1.26   | 1.44          | 1.20    | 1.48   |        |
| Q64442     | 20322      | Sord        | 0.86                      | 0.91    | 0.83   |        | 1.17          | 1.01    | 0.86   | 0.91   |
| Q62245     | 20662      | Sos1        |                           |         |        |        |               |         | 1.05   |        |
| P70663     | 13602      | Sparcl1     | 1.51                      | 0.97    | 0.89   | 1.37   | 1.70          | 1.02    | 1.28   | 0.82   |
| Q3UMC0     | 57815      | Spata5      |                           | 0.88    |        |        |               | 1.01    |        |        |
| Q64105     | 20751      | Spr         | 0.78                      | 0.92    | 0.89   | 0.68   | 1.08          | 0.90    | 0.88   |        |
| P16546     | 20740      | Sptan1      | 0.97                      | 0.96    | 1.03   | 0.96   | 1.07          | 1.01    | 0.97   | 1.04   |
| P15508     | 20741      | Sptb        | 1.23                      |         |        | 0.86   | 1.04          | 1.74    | 0.56   | 0.89   |
| Q62261     | 20742      | Sptbn1      | 1.00                      | 0.96    | 0.99   | 1.04   | 0.96          | 0.97    | 1.04   | 1.04   |
| Q9QWI6     | 56013      | Srcin1      | 1.68                      | 1.18    | 1.14   | 1.35   | 1.14          | 1.19    | 1.33   | 1.22   |
| Q812A2     | 259302     | Srgap3      | 1.10                      | 1.03    | 0.96   | 1.49   | 0.87          | 0.78    | 1.06   | 0.98   |
| Q6P069     | 109552     | Sri         |                           | 0.93    | 0.89   | 1.12   |               | 0.90    |        | 0.96   |
| Q8BMA6     | 217337     | Srp68 (Incl | 1.07                      | 0.95    | 0.84   |        | 0.90          | 0.94    | 1.48   | 0.91   |
| Q9QZX7     | 27364      | Srr         | 1.08                      | 1.03    | 1.26   | 1.23   |               | 1.01    | 0.84   | 1.04   |
| Q6PDM2     | 110809     | Srsf1       |                           |         |        |        | 1.43          |         | 1.18   |        |
| Q62093     | 20382      | Srsf2       | 1.03                      | 1.09    | 1.10   | 0.95   |               | 1.10    | 0.91   | 1.11   |
| P32067     | 20823      | Ssb         |                           |         | 1.29   |        | 1.04          | 1.04    | 1.19   | 1.15   |
| Q9CYR0     | 381760     | Ssbp1       | 1.10                      | 1.03    | 0.87   | 1.20   | 1.48          | 1.05    | 1.16   | 0.99   |
| Q62186     | 20832      | Ssr4        |                           |         |        |        |               |         |        | 1.08   |
| P60041     | 20604      | Sst         |                           | 0.71    | 0.87   |        |               | 0.68    |        | 1.23   |
| Q99L47     | 70356      | St13        | 0.96                      | 0.99    | 0.95   |        | 1.47          | 0.98    |        | 0.94   |
| P70297     | 20844      | Stam        | 1.46                      | 1.31    | 1.31   |        | 0.91          | 1.08    |        | 1.29   |
| Q60864     | 20867      | Stip1       | 0.93                      | 0.97    | 0.96   | 0.92   | 0.96          | 0.91    | 0.93   | 0.95   |
| Q9Z2W1     | 59041      | Stk25       | 1.11                      |         |        |        | 1.10          |         |        |        |

Supp. Table 1 (cont.)

| Uniprot_ID | Entrez_Gen | Symbol      | Developmental Myelination |         |        |        | Remyelination |         |        |        |      |
|------------|------------|-------------|---------------------------|---------|--------|--------|---------------|---------|--------|--------|------|
|            |            |             | Mut-w11                   | Mut-w12 | WT-w11 | WT-w12 | Mut-w11       | Mut-w12 | WT-w11 | WT-w12 |      |
| Q8QZV4     | 57740      | Stk32c      |                           |         | 0.97   |        |               |         |        |        |      |
| Q9Z1W9     | 53416      | Stk39       |                           |         | 0.87   | 2.37   |               | 1.02    |        |        | 1.07 |
| P54227     | 16765      | Stmn1       | 0.86                      | 0.90    | 0.92   | 0.88   | 0.91          | 0.83    | 0.83   | 0.96   | 0.96 |
| P55821     | 20257      | Stmn2       |                           | 0.79    | 1.00   |        |               | 0.79    |        |        | 1.01 |
| Q9ER00     | 100226     | Stx12       | 1.23                      | 1.05    | 1.23   | 0.91   | 1.31          | 1.17    | 1.22   | 1.09   | 1.09 |
| O35526     | 20907      | Stx1a       | 1.15                      | 1.01    | 1.18   | 1.07   | 1.79          | 1.07    | 0.92   | 1.12   | 1.12 |
| P61264     | 56216      | Stx1b       | 0.92                      | 0.86    | 0.90   | 0.89   | 1.13          | 0.81    | 0.99   | 0.92   | 0.92 |
| O08599     | 20910      | Stxbp1      | 0.97                      | 0.99    | 0.97   | 0.95   | 0.89          | 0.99    | 0.90   | 0.97   | 0.97 |
| Q8K400     | 78808      | Stxbp5      | 1.18                      | 0.93    | 1.09   |        | 0.76          | 1.39    |        |        | 1.22 |
| Q5DQR4     | 207227     | Stxbp5l     | 1.19                      |         |        | 1.18   | 1.84          | 1.52    |        |        |      |
| P11031     | 20024      | Sub1        |                           | 1.13    | 1.53   |        |               | 1.25    |        |        | 1.15 |
| Q9Z2I9     | 20916      | Sucla2      | 1.08                      | 1.00    | 0.91   | 1.13   | 1.03          | 1.00    | 1.09   | 0.95   | 0.95 |
| Q9WUM5     | 56451      | Suclg1      | 0.97                      | 0.96    | 0.90   | 0.94   | 0.93          | 0.96    | 1.05   | 0.92   | 0.92 |
| Q8CH09     | 234373     | Sugp2       |                           |         |        |        | 0.99          |         | 1.24   |        |      |
| Q9CX34     | 67955      | Sugt1       | 1.09                      | 1.00    | 1.11   |        | 1.04          | 1.08    | 1.32   | 1.05   | 1.05 |
| P63166     | 22218      | Sumo1       |                           |         |        | 1.09   |               |         |        |        |      |
| P61957     | 170930     | Sumo2       | 1.13                      | 1.04    | 0.96   |        | 1.32          | 0.96    |        |        | 1.02 |
| Q62383     | 20926      | Supt6h      |                           | 1.04    | 0.78   |        |               | 0.87    |        |        | 0.91 |
| Q9JIS5     | 64051      | Sv2a        | 0.96                      | 0.94    | 0.91   | 0.95   | 0.78          | 0.91    | 0.96   | 0.91   | 0.91 |
| Q8BG39     | 64176      | Sv2b        |                           | 1.01    | 1.05   | 1.28   | 1.10          | 0.96    |        |        | 1.05 |
| O88935     | 20964      | Syn1        | 3.05                      | 1.05    | 1.15   | 1.45   | 2.72          | 1.03    | 0.85   | 0.99   | 0.99 |
| Q64332     | 20965      | Syn2        | 1.75                      | 1.11    | 1.11   | 1.77   | 1.07          | 0.95    | 1.48   | 1.02   | 1.02 |
| Q7TMK9     | 56403      | Syncrip     | 1.14                      | 1.86    | 1.36   | 1.02   | 1.24          | 1.09    | 1.02   | 1.08   | 1.08 |
| Q6ZWR6     | 64009      | Syne1       | 0.97                      | 0.97    |        | 1.09   | 1.10          | 1.29    | 0.82   |        |      |
| O55100     | 20972      | Syngr1      | 0.97                      | 0.90    | 1.01   | 0.92   | 0.98          | 0.86    | 0.94   | 0.86   | 0.86 |
| Q8CHC4     | 104015     | Synj1       | 1.28                      | 1.05    | 1.03   | 1.21   | 1.19          | 1.02    | 1.22   | 1.00   | 1.00 |
| Q9D6K5     | 24071      | Synj2bp     |                           | 0.95    | 0.88   |        |               | 0.95    |        |        | 0.88 |
| Q8CC35     | 104027     | Synpo       | 1.14                      | 1.13    | 1.29   |        | 1.25          | 1.06    |        |        | 1.28 |
| Q62277     | 20977      | Syp         | 0.77                      | 0.96    | 0.97   | 0.76   | 0.89          | 0.93    | 0.88   | 0.93   | 0.93 |
| P46096     | 20979      | Syt1 (Inclu | 0.99                      | 1.02    | 1.18   | 0.96   | 1.17          | 1.00    | 0.90   | 1.03   | 1.03 |
| P46097     | 20980      | Syt2        | 1.04                      | 0.98    |        | 0.97   | 1.87          | 0.99    | 0.89   | 0.88   | 0.88 |
| Q8K0Z7     | 70207      | Taco1       |                           |         |        |        |               | 1.02    | 1.07   |        |      |
| Q9WVA4     | 21346      | Tagln2      |                           | 1.24    |        |        |               | 1.62    |        |        |      |
| Q9R1Q8     | 56370      | Tagln3      | 0.96                      | 0.96    | 1.00   | 1.02   | 1.22          | 0.95    | 1.02   | 1.05   | 1.05 |
| Q93092     | 21351      | Taldo1      | 0.91                      | 0.97    | 0.94   | 0.82   | 1.01          | 0.94    | 0.99   | 0.94   | 0.94 |
| Q921F2     | 230908     | Tardbp      | 1.19                      | 1.14    | 1.58   | 2.26   | 1.06          | 1.10    | 1.34   | 1.14   | 1.14 |
| Q9D0R2     | 110960     | Tars        | 1.16                      | 1.08    | 0.94   |        | 0.94          | 0.85    |        |        | 0.87 |
| P48428     | 21371      | Tbca        | 0.92                      | 0.96    | 0.86   | 0.94   | 0.95          | 0.88    |        |        | 0.77 |
| Q9D1E6     | 66411      | Tbcb        |                           |         | 0.98   | 1.26   |               | 0.92    | 1.02   | 0.92   | 0.92 |
| Q8R0A5     | 66104 594  | Tceal3      | 2.42                      | 1.00    | 1.08   | 1.20   | 1.87          | 0.86    | 1.83   | 0.98   | 0.98 |
| Q8CCT4     | 331532     | Tceal5      | 2.03                      | 1.06    | 1.06   | 2.24   | 1.95          | 1.01    | 1.49   | 1.09   | 1.09 |
| P83940     | 67923      | Tceb1       | 1.12                      | 1.06    | 0.99   | 1.11   | 0.90          | 0.98    | 0.94   | 1.00   | 1.00 |
| P62869     | 67673      | Tceb2       | 1.04                      | 0.87    | 0.85   | 1.06   | 0.98          | 0.95    | 0.94   | 0.90   | 0.90 |
| Q8CGF7     | 56070      | Tcerg1      |                           |         |        | 1.78   |               |         |        |        |      |
| P11983     | 21454      | Tcp1        | 0.93                      | 1.05    | 0.98   | 1.19   | 0.83          | 0.98    | 1.00   | 1.00   | 1.00 |
| Q921I1     | 22041      | Tf          | 0.89                      | 0.53    | 1.15   | 0.91   | 0.50          | 0.60    | 0.75   | 0.61   | 0.61 |

Supp. Table 1 (cont.)

| Uniprot_ID | Entrez_Gen | Symbol     | Developmental Myelination |         |        |        | Remyelination |         |        |        |
|------------|------------|------------|---------------------------|---------|--------|--------|---------------|---------|--------|--------|
|            |            |            | Mut-w11                   | Mut-w12 | WT-w11 | WT-w12 | Mut-w11       | Mut-w12 | WT-w11 | WT-w12 |
| Q62351     | 22042      | Tfrc       |                           |         | 0.95   |        |               |         |        | 0.71   |
| Q3UUU3     | 75778      | Them4      | 1.13                      | 1.39    | 1.28   |        | 0.95          | 1.20    | 1.05   | 1.27   |
| Q8BH55     | 208967     | Thnsl1     |                           | 0.60    |        |        |               |         |        | 1.54   |
| Q8C1A5     | 50492      | Thop1      | 0.90                      | 1.01    | 0.94   |        | 1.06          | 0.89    | 0.92   | 0.98   |
| Q569Z6     | 230753     | Thrap3     |                           | 1.23    |        | 2.02   |               |         |        |        |
| P01831     | 21838      | Thy1       | 0.96                      | 0.93    | 1.17   | 0.80   | 0.99          | 1.14    | 0.98   | 1.07   |
| P62073     | 30059      | Timm10     | 0.91                      | 0.94    | 0.99   | 0.97   | 1.39          | 0.88    | 0.99   | 1.00   |
| P62075     | 30055      | Timm13     |                           | 1.01    | 0.97   | 1.06   | 1.21          | 0.99    |        | 1.01   |
| Q9CQ85     | 56322      | Timm22     |                           |         |        |        | 1.50          |         |        |        |
| Q35857     | 21856      | Timm44     | 0.73                      | 1.11    | 1.44   |        |               | 1.09    | 1.34   | 1.00   |
| Q9D880     | 66525      | Timm50     | 1.13                      | 1.16    | 1.12   |        | 0.80          | 1.05    | 1.22   | 1.09   |
| P62077     | 30057      | Timm8b     |                           |         |        |        |               | 1.01    |        |        |
| Q9WV98     | 30056      | Timm9      | 0.96                      | 1.01    | 0.97   | 0.95   | 1.07          | 0.96    | 0.87   | 0.99   |
| Q8BH58     | 226591     | Tiprl      | 1.32                      |         |        |        |               |         | 1.04   |        |
| P40142     | 21881      | Tkt        | 0.79                      | 0.91    | 0.81   | 0.75   | 1.00          | 0.86    | 0.76   | 0.83   |
| P26039     | 21894      | Tln1       | 1.42                      | 1.07    |        | 1.36   | 1.19          | 1.29    | 1.35   | 1.27   |
| Q71LX4     | 70549      | Tln2       | 1.40                      | 1.17    | 1.11   | 1.77   | 1.16          | 1.15    | 1.17   | 0.99   |
| Q9D1D4     | 100042773  | Tmed10     | 0.97                      | 1.10    | 1.07   | 0.86   | 1.09          | 1.10    | 1.05   | 0.99   |
| Q9R0Q3     | 56334      | Tmed2      |                           | 0.87    |        |        |               |         |        |        |
| Q99KF1     | 67511      | Tmed9      | 1.02                      | 1.06    |        |        |               | 1.13    |        | 1.09   |
| Q99KI3     | 66087      | Tmem111    |                           |         |        |        | 0.87          |         |        |        |
| Q9D8Y1     | 66271      | Tmem126a   |                           | 1.32    |        |        |               | 1.18    |        |        |
| Q8VEK0     | 69981      | Tmem30a    |                           |         |        |        |               |         | 0.95   |        |
| Q4VAE3     | 74868      | Tmem65     | 0.90                      | 1.03    | 0.94   | 0.97   | 1.26          | 0.98    | 0.92   | 1.16   |
| Q9JKK7     | 50876      | Tmod2      | 0.92                      | 0.91    | 0.98   | 1.09   | 1.14          | 0.84    | 1.00   | 0.98   |
| Q6ZWY8     | 19240 399  | Tmsb10/Tr  | 1.35                      | 0.96    | 1.00   | 0.92   | 1.31          | 0.82    | 1.19   | 1.20   |
| Q8C0L0     | 52837      | Tmx4       |                           |         | 0.74   |        |               | 1.04    | 0.84   |        |
| P58871     | 228140     | Tnks1bp1   |                           | 1.17    | 1.48   |        |               | 1.55    |        | 1.04   |
| Q99LG2     | 212999     | Tnp02      | 0.79                      | 1.02    | 0.95   | 1.13   | 1.12          | 1.06    | 1.18   |        |
| Q6P2B1     | 320938     | Tnp03      |                           | 1.19    |        | 1.08   | 1.09          |         | 1.01   |        |
| Q8BYI9     | 21960      | Tnr        | 0.92                      | 1.00    | 0.93   | 0.80   | 0.98          | 1.01    | 0.90   | 0.98   |
| Q9QZ06     | 54473      | Tollip     |                           | 1.04    | 1.06   | 1.00   | 0.84          | 0.93    | 0.97   | 0.98   |
| Q9DCC8     | 67952      | Tomm20     | 1.40                      | 1.31    | 1.63   | 1.01   | 1.55          | 1.15    |        |        |
| Q9CPQ3     | 223696     | Tomm22     |                           |         |        | 1.04   | 1.11          | 1.18    | 0.99   |        |
| Q9QYA2     | 53333      | Tomm40     | 1.08                      |         |        |        |               |         |        |        |
| B1AXP6     | 68512      | Tomm5      |                           | 0.98    |        |        |               | 0.99    |        | 1.02   |
| Q9CZW5     | 28185      | Tomm70a    | 1.23                      | 0.98    | 0.96   | 1.18   | 1.13          | 1.01    | 1.38   | 0.99   |
| Q62393     | 21985      | Tpd52      | 0.98                      | 1.07    | 1.17   |        | 1.30          | 1.02    | 0.99   | 1.02   |
| Q9CYZ2     | 66314      | Tpd52l2    | 0.95                      | 0.85    | 0.98   | 1.27   |               | 0.98    | 1.13   | 1.17   |
| P17751     | 21991      | Tpi1       | 0.91                      | 1.00    | 1.00   | 0.89   | 1.05          | 0.97    | 0.97   | 0.98   |
| P58771     | 22003      | Tpm1 (Incl | 0.87                      | 1.02    | 1.06   | 1.00   | 1.45          | 1.02    | 0.95   | 1.06   |
| P21107     | 59069      | Tpm3       | 1.04                      | 1.04    | 1.01   | 1.01   | 1.26          | 0.97    | 0.96   | 1.08   |
| Q6IRU2     | 326618     | Tpm4       |                           | 1.44    |        |        |               | 0.92    |        |        |
| Q64514     | 22019      | Tpp2       | 1.17                      | 1.07    | 0.93   | 1.03   | 0.90          | 0.96    | 1.08   | 0.96   |
| Q7TQD2     | 72948      | Tppp       | 0.97                      | 1.02    | 0.97   | 1.22   | 1.07          | 0.96    | 1.09   | 0.91   |
| Q9CRB6     | 67971      | Tppp3      | 1.05                      | 0.94    | 0.62   | 0.75   | 0.97          | 0.75    | 1.22   | 0.74   |

Supp. Table 1 (cont.)

| Uniprot ID | Entrez Gene | Symbol              | Developmental Myelination |         |        |        | Remyelination |         |        |        |
|------------|-------------|---------------------|---------------------------|---------|--------|--------|---------------|---------|--------|--------|
|            |             |                     | Mut-w11                   | Mut-w12 | WT-w11 | WT-w12 | Mut-w11       | Mut-w12 | WT-w11 | WT-w12 |
| Q9DBS2     | 67808       | Tprg1l              | 1.14                      |         | 0.96   | 1.42   |               | 1.00    | 1.07   | 1.04   |
| P63028     | 22070       | Tpt1 (Includ        | 1.04                      | 0.94    | 0.98   | 0.93   | 0.87          | 0.93    | 1.01   | 1.02   |
| Q9CQN1     | 68015       | Trap1               |                           | 0.82    |        |        |               |         | 1.10   |        |
| Q9JME7     | 59005       | Trappc2l            |                           |         | 1.38   |        |               | 1.03    |        | 0.99   |
| O55013     | 27096       | Trappc3             |                           | 1.16    | 1.00   | 0.94   | 1.55          | 0.94    |        | 1.02   |
| Q9D289     | 78232       | Trappc6b            | 1.10                      | 0.93    | 0.76   |        | 0.89          | 1.06    |        |        |
| Q3U0M1     | 76510       | Trappc9             | 1.13                      |         |        | 1.15   | 1.06          |         |        |        |
| Q9ESN6     | 80890       | Trim2               | 1.66                      | 1.18    | 1.03   | 1.88   | 2.16          | 1.04    | 1.50   | 0.97   |
| Q8BGX0     | 81003       | Trim23              |                           | 0.82    | 0.86   |        |               | 0.99    |        | 0.98   |
| Q62318     | 21849       | Trim28              |                           | 1.02    | 0.96   |        |               | 0.99    |        | 1.15   |
| Q9R1R2     | 55992       | Trim3               | 1.35                      | 1.05    | 0.96   | 1.87   | 1.88          | 0.96    |        | 0.98   |
| Q0KL02     | 223435      | Trio                | 1.26                      | 1.10    | 1.41   | 1.39   |               | 1.09    | 1.33   | 1.05   |
| P62500     | 21807       | Tsc22d1             | 0.71                      |         |        |        |               | 0.99    |        |        |
| Q9CZR8     | 66399       | Tsfm                | 0.97                      |         |        |        |               |         |        |        |
| Q62348     | 22099       | Tsn                 | 0.90                      | 1.00    | 0.92   |        | 0.75          | 0.84    | 0.88   | 0.96   |
| Q9QZE7     | 53424       | Tsnax               | 1.17                      |         |        |        | 1.23          |         |        | 1.00   |
| Q922J6     | 70747       | Tspan2              | 1.10                      | 0.78    |        | 1.24   |               | 0.84    | 0.75   | 0.53   |
| Q62283     | 21912       | Tspan7              |                           | 0.91    | 1.09   |        |               | 0.87    |        | 0.85   |
| Q8C8T8     | 69499       | Tsr2 (Includ        | 0.98                      |         | 0.91   |        |               |         |        | 0.94   |
| P52196     | 22117       | Tst                 | 0.91                      | 0.94    | 0.99   | 0.81   | 0.96          | 0.86    | 0.79   | 0.86   |
| A2ASS6     | 22138       | Ttn (Includ         | 1.12                      | 1.03    |        |        |               | 1.37    | 0.82   | 1.14   |
| P07309     | 22139       | Ttr                 | 0.98                      |         | 1.73   |        | 0.65          |         |        |        |
| P68368     | 22145       | Tuba4a              |                           | 0.98    |        |        |               | 0.93    |        | 1.08   |
| P99024     | 22154       | Tubb                | 1.10                      | 1.03    | 1.04   | 1.01   | 0.92          | 0.99    | 0.95   | 1.06   |
| Q7TMM9     | 22151       | Tubb2a              | 1.00                      | 1.03    | 0.99   | 1.01   | 0.89          | 0.94    | 0.98   | 1.01   |
| Q9CWF2     | 73710       | Tubb2b              |                           |         |        |        |               | 1.05    |        |        |
| Q9ERD7     | 22152       | Tubb3               | 0.98                      | 0.99    | 0.96   | 0.96   | 0.88          | 0.94    | 0.95   | 0.98   |
| Q9D6F9     | 22153       | Tubb4a              | 1.03                      | 0.93    | 0.99   | 1.03   | 0.85          | 0.98    | 0.92   | 1.00   |
| P68372     | 227613      | Tubb4b              | 0.94                      | 0.94    | 0.94   | 0.61   | 0.94          | 0.92    |        | 0.97   |
| Q8BFR5     | 233870      | Tufm                | 1.07                      | 1.03    | 1.04   | 1.07   | 0.88          | 1.03    | 1.27   | 0.98   |
| Q91YR1     | 19230       | Twf1 (Includes eg:1 |                           | 0.89    | 1.08   |        |               |         |        | 1.37   |
| Q9Z0P5     | 23999       | Twf2                | 1.04                      | 1.03    | 1.15   | 1.83   | 1.12          | 1.00    | 0.99   | 1.20   |
| P10639     | 22166       | Txn (Includ         | 1.03                      | 0.98    | 0.98   | 1.09   | 0.93          | 0.91    | 0.99   | 0.91   |
| Q9CQU0     | 66073       | Txndc12             |                           | 0.90    | 1.24   | 1.08   |               | 1.09    |        | 1.08   |
| Q9CQM5     | 52700       | Txndc17             | 1.09                      | 0.94    | 0.92   | 1.16   | 0.98          | 0.92    |        | 0.97   |
| Q8CDN6     | 53382       | Txnl1               | 1.18                      | 1.05    | 0.97   | 0.83   |               | 0.98    | 1.06   | 0.91   |
| Q02053     | 22201       | Uba1                | 0.92                      | 0.96    | 0.94   | 0.82   | 1.03          | 0.92    | 0.84   | 0.95   |
| Q8C7R4     | 231380      | Uba6                |                           |         |        | 0.88   | 0.97          | 0.83    |        |        |
| Q80X50     | 74383       | Ubp2l               |                           | 1.15    |        |        |               | 1.08    |        | 1.12   |
| P61079     | 66105       | Ube2d3              |                           | 0.92    | 0.85   | 1.17   |               | 0.89    |        | 0.89   |
| P68037     | 22195       | Ube2l3              | 0.86                      | 1.01    | 0.91   | 0.87   | 0.78          | 0.93    | 1.04   | 0.93   |
| P61082     | 22192       | Ube2M               |                           | 0.95    | 1.11   | 1.10   |               | 0.80    |        | 1.12   |
| P61089     | 93765       | Ube2N               | 1.03                      | 1.00    | 0.91   | 0.94   | 0.99          | 0.94    | 1.02   | 0.95   |
| Q6ZPJ3     | 217342      | Ube2o               | 1.54                      | 1.07    | 1.17   | 1.24   | 1.16          | 1.14    | 1.81   | 1.09   |
| Q9CZY3     | 66589       | Ube2v1              |                           | 0.91    | 0.99   |        |               | 0.85    |        |        |
| Q9D2M8     | 70620       | Ube2v2              | 0.84                      | 0.97    |        | 0.91   | 0.67          | 0.99    | 0.79   |        |

Supp. Table 1 (cont.)

| Uniprot_ID | Entrez_Gen | Symbol                    | Developmental Myelination |         |        |        | Remyelination |         |        |        |
|------------|------------|---------------------------|---------------------------|---------|--------|--------|---------------|---------|--------|--------|
|            |            |                           | Mut-w11                   | Mut-w12 | WT-w11 | WT-w12 | Mut-w11       | Mut-w12 | WT-w11 | WT-w12 |
| P21126     | 27643      | Ubl4a                     |                           | 1.08    | 1.09   |        |               | 0.96    | 1.31   | 0.89   |
| Q8R317     | 56085      | Ubqln1                    |                           |         |        |        |               | 0.99    | 1.34   | 1.02   |
| Q9QZM0     | 54609      | Ubqln2                    | 1.55                      | 1.02    | 0.97   | 1.42   | 1.99          | 0.94    | 1.23   | 0.96   |
| A2AN08     | 69116      | Ubr4                      |                           | 1.11    | 1.38   | 1.34   | 1.28          | 1.20    | 0.86   | 1.16   |
| Q99PL6     | 66530      | Ubxn6                     |                           | 1.02    | 1.11   |        |               |         | 0.95   | 0.71   |
| Q6P5G6     | 224111     | Ubxn7                     |                           |         |        |        |               | 1.05    |        |        |
| Q9R0P9     | 22223      | Uchl1                     | 1.01                      | 1.04    | 0.87   | 0.90   | 1.05          | 0.97    | 1.11   | 0.97   |
| Q9JKB1     | 50933      | Uchl3                     | 0.93                      | 1.06    | 1.10   | 1.04   |               | 0.96    | 0.89   | 0.91   |
| Q9WUP7     | 56207      | Uchl5                     |                           | 0.93    | 1.15   |        | 1.53          | 1.00    |        |        |
| Q9CR09     | 66155      | Ufc1                      | 0.70                      | 0.82    | 0.86   | 0.80   | 0.64          | 0.93    | 0.92   | 0.86   |
| P61961     | 67890      | Ufm1                      | 1.25                      |         | 0.90   |        |               | 0.85    | 1.14   |        |
| Q6P5E4     | 320011     | Uggt1                     | 1.20                      | 1.12    | 0.83   | 0.91   | 0.98          | 0.94    |        | 0.84   |
| Q91ZJ5     | 216558     | Ugp2                      | 1.07                      | 1.01    | 1.11   | 1.12   | 1.07          | 1.07    | 1.07   | 1.06   |
| Q4KUS2     | 382018     | Unc13a                    | 2.04                      | 1.12    | 1.41   | 1.48   |               | 1.46    | 1.22   |        |
| Q9EPU0     | 19704      | Upf1                      |                           | 1.15    | 1.21   | 0.92   |               |         |        | 0.95   |
| Q8R111     | 66152      | Uqcr10                    | 1.05                      | 1.11    | 1.01   | 0.96   | 1.46          | 0.90    | 1.03   |        |
| Q9D855     | 67530      | Uqcrb                     | 0.96                      | 0.94    | 0.96   | 0.99   | 0.97          | 0.98    | 0.85   | 0.99   |
| Q9CZ13     | 22273      | Uqcrc1                    | 1.04                      | 0.99    | 1.07   | 0.91   | 0.97          | 1.07    | 1.20   | 1.05   |
| Q9DB77     | 67003      | Uqcrc2                    | 0.97                      | 0.96    | 1.04   | 0.88   | 1.10          | 1.07    | 1.07   | 1.00   |
| Q9CR68     | 66694      | Uqcrfs1                   | 1.00                      | 0.93    | 0.99   |        | 0.99          | 1.06    | 1.10   | 0.94   |
| Q9CQ69     | 22272      | Uqcrq                     | 0.85                      | 0.90    | 0.99   | 0.95   | 0.75          | 1.01    | 1.08   | 0.90   |
| Q78IK2     | 66477      | Usmg5                     | 0.92                      | 1.00    | 0.95   | 1.06   | 0.96          | 1.04    | 0.90   | 0.91   |
| Q9Z1Z0     | 56041      | Uso1                      | 1.13                      | 0.89    | 1.18   | 0.97   | 1.57          | 0.86    | 0.98   | 1.10   |
| Q9JMA1     | 59025      | Usp14                     |                           |         |        | 0.96   |               |         | 1.10   |        |
| Q8R5H1     | 14479      | Usp15                     |                           |         | 1.37   | 0.94   |               | 1.23    | 1.16   |        |
| P56399     | 22225      | Usp5                      | 0.96                      | 0.98    | 0.95   | 0.92   | 0.92          | 0.96    | 0.90   | 0.92   |
| Q6A4J8     | 252870     | Usp7                      | 0.94                      | 1.05    | 1.30   | 1.14   | 1.00          | 0.93    | 0.91   | 1.02   |
| P70398     | 22284      | Usp9X                     | 1.16                      | 1.06    | 1.02   | 1.00   | 0.97          | 1.12    | 1.03   | 0.87   |
| Q62442     | 22317      | Vamp1                     | 1.16                      | 1.14    | 0.87   | 0.79   | 1.31          | 1.43    | 1.55   | 1.07   |
| P63044     | 22318      | Vamp2                     | 1.30                      | 1.29    | 1.16   | 1.26   | 1.27          | 1.19    | 1.08   | 1.28   |
| O70480     | 53330      | Vamp4                     |                           | 1.11    |        |        |               | 1.07    |        |        |
| Q9WV55     | 30960      | Vapa                      | 1.37                      | 1.00    | 1.02   | 1.13   | 1.30          | 1.00    | 1.45   | 1.01   |
| Q9QY76     | 56491      | Vapb                      | 1.38                      | 1.19    | 0.99   | 1.34   | 1.14          | 1.06    | 1.35   | 1.06   |
| Q9Z1Q9     | 22321      | Vars                      | 1.12                      | 0.92    | 0.84   | 0.92   | 1.00          | 0.97    | 0.95   | 0.98   |
| Q62465     | 26949      | Vat1                      |                           | 1.02    | 0.63   |        | 0.32          | 0.86    |        | 0.83   |
| Q80TB8     | 270097     | Vat1l                     | 1.25                      | 0.85    | 0.50   | 0.76   | 1.01          | 0.66    | 1.33   | 0.70   |
| Q62059     | 13003      | Vcan                      | 1.21                      | 1.02    | 1.08   | 0.98   | 1.05          | 1.68    | 1.17   | 1.39   |
| Q64727     | 22330      | Vcl                       | 0.92                      | 1.10    | 0.95   | 1.12   | 1.08          | 1.01    | 1.09   | 1.09   |
| Q01853     | 269523     | Vcp                       | 0.91                      | 0.98    | 0.98   | 0.85   | 1.08          | 0.88    | 0.90   | 0.99   |
| Q8CDG3     | 70675      | Vcpip1                    | 1.37                      | 0.95    | 1.32   | 1.24   | 1.18          | 0.91    |        | 1.06   |
| Q60932     | 22333      | Vdac1                     | 0.98                      | 1.02    | 0.99   | 0.75   | 1.00          | 1.06    | 1.11   | 1.02   |
| Q60930     | 22334      | Vdac2                     | 0.89                      | 0.97    | 0.92   | 0.78   | 0.86          | 1.06    | 1.05   | 0.99   |
| Q60931     | 22335      | Vdac3                     | 0.86                      | 1.03    | 0.95   | 0.79   | 0.96          | 1.06    | 1.28   | 0.98   |
| P20152     | 22352      | Vim                       | 1.14                      |         | 1.03   | 0.86   | 0.93          |         | 1.84   | 1.98   |
| Q8BX70     | 320528     | Vps13c                    | 1.40                      | 0.90    | 1.29   | 1.65   | 1.03          | 1.33    |        | 1.71   |
| Q9CQ80     | 28084      | Vps25 (Includes eg:28084) |                           |         | 0.82   |        |               |         |        |        |

Supp. Table 1 (cont.)

| Uniprot_ID | Entrez_Gen | Symbol                     | Developmental Myelination |         |        |        | Remyelination |         |        |        |
|------------|------------|----------------------------|---------------------------|---------|--------|--------|---------------|---------|--------|--------|
|            |            |                            | Mut-w11                   | Mut-w12 | WT-w11 | WT-w12 | Mut-w11       | Mut-w12 | WT-w11 | WT-w12 |
| P40336     | 30930      | Vps26a                     | 1.17                      | 1.02    | 3.48   |        | 0.84          | 1.43    | 0.82   | 0.80   |
| Q8C0E2     | 69091      | Vps26b                     | 0.98                      | 1.16    | 1.04   | 1.24   | 1.03          | 1.03    | 1.26   | 1.16   |
| Q9D1C8     | 66914      | Vps28 (Includes eg:300052) |                           |         |        |        |               | 1.17    |        |        |
| Q9QZ88     | 56433      | Vps29 (Inc                 | 0.96                      | 1.00    | 0.96   |        |               | 1.04    |        | 0.99   |
| P59016     | 233405     | Vps33b                     | 0.91                      |         |        |        | 1.02          |         | 1.20   |        |
| Q9EQH3     | 65114      | Vps35                      | 1.11                      | 1.03    | 1.02   | 0.98   | 0.99          | 1.02    | 1.07   | 1.00   |
| P97390     | 22365      | Vps45                      |                           |         |        |        |               | 1.04    |        | 1.12   |
| P62761     | 26950      | Vsnl1                      | 1.03                      | 0.96    | 1.08   | 0.95   | 1.12          | 1.09    | 1.08   | 1.03   |
| Q9CR26     | 66201      | Vta1 (Includes eg:292640)  |                           |         |        | 0.51   |               |         |        |        |
| Q88384     | 53612      | Vti1b                      |                           |         |        |        |               | 0.87    |        |        |
| P32921     | 22375      | Wars                       |                           |         |        |        |               |         | 1.02   |        |
| Q8R5H6     | 83767      | Wasf1                      | 1.75                      | 1.09    | 1.25   | 1.69   | 1.31          | 1.02    | 1.61   | 1.08   |
| Q8VHI6     | 245880     | Wasf3                      |                           | 0.79    | 0.70   |        |               | 0.89    |        | 1.07   |
| Q91YD9     | 73178      | Wasl                       |                           | 1.09    |        |        |               | 1.15    |        | 0.81   |
| P97765     | 22378      | Wbp2                       |                           | 0.97    |        |        |               |         |        | 0.79   |
| Q6VNB8     | 72145      | Wdfy3                      | 1.04                      | 0.95    |        |        | 0.96          |         | 1.08   |        |
| Q88342     | 22388      | Wdr1                       | 0.95                      | 1.00    | 1.05   | 0.88   | 0.91          | 0.99    | 0.86   | 1.09   |
| Q8CBE3     | 207615     | Wdr37                      |                           |         |        |        |               |         | 1.06   |        |
| Q8CGF6     | 99512      | Wdr47                      |                           | 1.01    |        |        | 0.88          | 1.10    | 0.89   |        |
| Q8BH57     | 67561      | Wdr48                      |                           |         | 0.84   |        |               |         |        |        |
| P61965     | 140858     | Wdr5                       |                           |         | 1.40   |        |               | 1.17    |        |        |
| Q9ERF3     | 66317      | Wdr61                      |                           |         |        |        | 0.84          |         |        |        |
| Q920I9     | 104082     | Wdr7                       | 1.26                      | 1.12    | 1.10   | 1.22   | 0.91          | 1.10    | 1.19   | 1.08   |
| Q6P1B1     | 170750     | Xpnpep1                    | 1.11                      | 1.09    | 0.97   | 0.94   | 0.96          | 1.07    | 1.01   | 0.87   |
| Q6P5F9     | 103573     | Xpo1                       | 1.06                      | 0.99    | 0.98   | 1.14   | 0.83          | 1.03    | 1.07   | 1.15   |
| Q924C1     | 72322      | Xpo5                       |                           | 2.46    |        |        |               | 2.53    |        |        |
| Q9EPK7     | 65246      | Xpo7                       | 1.33                      | 0.96    | 1.20   | 1.03   | 0.95          | 1.03    | 0.87   | 1.00   |
| Q91WQ3     | 107271     | Yars                       | 1.00                      | 0.80    | 1.02   | 1.13   | 1.03          | 0.79    | 0.84   | 0.92   |
| Q9CQW1     | 56418      | Ykt6                       | 1.18                      | 1.01    | 1.10   | 1.08   | 1.03          | 1.09    | 2.26   | 1.02   |
| Q9CQV8     | 54401      | Ywhab                      | 1.06                      | 1.03    | 0.97   | 1.05   | 1.01          | 1.01    | 1.06   | 1.01   |
| P62259     | 22627      | Ywhae                      | 1.02                      | 1.01    | 0.99   | 0.97   | 0.98          | 0.98    | 0.95   | 0.98   |
| P61982     | 22628      | Ywhag                      | 1.00                      | 1.00    | 0.99   | 0.94   | 1.00          | 0.98    | 1.04   | 0.97   |
| P68510     | 22629      | Ywhah                      | 1.07                      | 1.03    | 1.10   | 1.00   | 0.96          | 1.04    | 1.01   | 1.03   |
| P68254     | 22630      | Ywhaq                      | 0.99                      | 1.03    | 0.96   | 0.94   | 0.91          | 0.98    | 1.10   | 1.01   |
| P63101     | 22631      | Ywhaz                      | 0.97                      | 1.02    | 1.07   | 1.01   | 0.95          | 1.00    | 0.96   | 1.05   |
| Q80ZJ6     | 227693     | Zer1                       |                           |         |        |        | 0.90          |         |        |        |
| Q5SSH7     | 195018     | Zzef1                      |                           |         |        | 1.65   |               |         |        |        |

Supp. Table 2

| Symbol    | Cluster | WT,<br>developmental<br>myelination<br>response | WT, remyelination<br>response | eIF2B <sup>M</sup> ,<br>developmental<br>myelination<br>response | eIF2B <sup>M</sup> ,<br>remyelination<br>response |
|-----------|---------|-------------------------------------------------|-------------------------------|------------------------------------------------------------------|---------------------------------------------------|
| Ahcy      | 1       | 1.04                                            | 0.99                          | 1.08                                                             | 0.73                                              |
| Macf1     | 1       | 1.00                                            | 0.98                          | 1.13                                                             | 0.69                                              |
| Rps6      | 1       | 1.03                                            | 0.94                          | 1.37                                                             | 0.72                                              |
| Asna1     | 1       | 1.09                                            | 0.82                          | 1.26                                                             | 0.41                                              |
| Ccdc132   | 1       | 1.07                                            | 0.89                          | 1.02                                                             | 0.68                                              |
| Itpa      | 1       | 1.12                                            | 0.85                          | 1.03                                                             | 0.62                                              |
| Ncam2     | 1       | 1.10                                            | 0.92                          | 1.00                                                             | 0.70                                              |
| Nln       | 1       | 1.25                                            | 0.90                          | 1.11                                                             | 0.66                                              |
| Pacsin1   | 1       | 0.99                                            | 1.02                          | 1.01                                                             | 0.67                                              |
| Psd3      | 1       | 1.11                                            | 1.05                          | 1.17                                                             | 0.52                                              |
| Stx1b     | 1       | 0.99                                            | 0.93                          | 0.94                                                             | 0.72                                              |
| Timm10    | 1       | 0.99                                            | 1.01                          | 1.03                                                             | 0.63                                              |
| Tmod2     | 1       | 1.11                                            | 0.98                          | 0.99                                                             | 0.73                                              |
| Atpif1    | 1       | 1.00                                            | 1.02                          | 1.01                                                             | 0.75                                              |
| Fabp7     | 1       | 1.11                                            | 0.87                          | 1.18                                                             | 0.71                                              |
| Pitpna    | 1       | 1.00                                            | 0.86                          | 1.01                                                             | 0.75                                              |
| Plcx3     | 1       | 1.13                                            | 0.95                          | 1.09                                                             | 0.79                                              |
| Por       | 1       | 0.96                                            | 0.80                          | 1.20                                                             | 0.55                                              |
| Fkbp3     | 1       | 1.19                                            | 1.02                          | 1.20                                                             | 0.83                                              |
| Cul3      | 1       | 1.10                                            | 1.01                          | 1.07                                                             | 0.87                                              |
| Gdap1     | 1       | 1.08                                            | 1.02                          | 1.16                                                             | 0.86                                              |
| Nedd8     | 1       | 1.03                                            | 0.98                          | 1.07                                                             | 0.93                                              |
| Rab1a     | 1       | 1.04                                            | 1.01                          | 1.04                                                             | 0.99                                              |
| Rps27a    | 1       | 1.03                                            | 1.04                          | 1.08                                                             | 0.93                                              |
| C14Orf166 | 1       | 0.94                                            | 0.90                          | 0.96                                                             | 0.82                                              |
| Cdc42     | 1       | 1.02                                            | 0.98                          | 0.99                                                             | 0.85                                              |
| Rap2b     | 1       | 1.04                                            | 0.99                          | 1.03                                                             | 0.88                                              |
| Skp1/Skp1 | 1       | 0.97                                            | 0.99                          | 0.97                                                             | 0.87                                              |
| Snx12     | 1       | 0.96                                            | 0.97                          | 1.06                                                             | 0.83                                              |
| Syng1     | 1       | 0.91                                            | 0.92                          | 0.93                                                             | 0.88                                              |
| Tagln3    | 1       | 1.01                                            | 1.03                          | 1.00                                                             | 0.78                                              |
| Arhgdia   | 2       | 1.14                                            | 0.85                          | 0.85                                                             | 0.60                                              |
| Efhd2     | 2       | 1.10                                            | 0.96                          | 0.92                                                             | 0.61                                              |
| Dnajc5    | 2       | 1.03                                            | 0.76                          | 0.74                                                             | 0.43                                              |
| Plcb1     | 2       | 1.38                                            | 0.84                          | 0.64                                                             | 0.46                                              |
| Ubqln2    | 2       | 1.46                                            | 0.78                          | 0.66                                                             | 0.47                                              |
| Pdap1     | 2       | 1.75                                            | 0.93                          | 0.76                                                             | 0.56                                              |
| Lgalsl    | 2       | 0.99                                            | 0.97                          | 0.74                                                             | 0.60                                              |
| Naca      | 2       | 1.03                                            | 0.90                          | 0.79                                                             | 0.66                                              |
| Rps3a     | 2       | 1.06                                            | 0.97                          | 0.85                                                             | 0.77                                              |
| Prosc     | 2       | 0.92                                            | 0.90                          | 0.84                                                             | 0.69                                              |
| Basp1     | 2       | 1.65                                            | 1.26                          | 0.96                                                             | 0.66                                              |
| Dlg3      | 2       | 1.19                                            | 1.11                          | 0.90                                                             | 0.84                                              |
| Fkbp2     | 2       | 1.17                                            | 1.10                          | 0.95                                                             | 0.79                                              |
| Pea15     | 2       | 1.25                                            | 1.14                          | 0.91                                                             | 0.78                                              |
| Twf2      | 2       | 1.60                                            | 1.21                          | 0.99                                                             | 0.90                                              |

Supp. Table 2 (cont.)

| Symbol      | Cluster | WT,<br>developmental<br>myelination<br>response | WT, remyelination<br>response | eIF2B <sup>M</sup> ,<br>developmental<br>myelination<br>response | eIF2B <sup>M</sup> ,<br>remyelination<br>response |
|-------------|---------|-------------------------------------------------|-------------------------------|------------------------------------------------------------------|---------------------------------------------------|
| Cltb        | 2       | 1.32                                            | 1.00                          | 0.76                                                             | 0.69                                              |
| Eef1g       | 2       | 1.22                                            | 1.05                          | 0.90                                                             | 0.79                                              |
| Pebp1       | 2       | 1.16                                            | 1.08                          | 0.90                                                             | 0.88                                              |
| Rab2a       | 2       | 1.26                                            | 1.03                          | 0.94                                                             | 0.86                                              |
| Ank2        | 2       | 1.14                                            | 1.05                          | 1.01                                                             | 0.87                                              |
| Ap2a2       | 2       | 1.10                                            | 1.04                          | 0.94                                                             | 0.86                                              |
| Arpc4       | 2       | 1.03                                            | 1.02                          | 1.00                                                             | 0.92                                              |
| Mapk1       | 2       | 1.05                                            | 0.99                          | 0.93                                                             | 0.85                                              |
| Pdhb        | 2       | 1.07                                            | 1.03                          | 0.97                                                             | 0.89                                              |
| Rab14       | 2       | 1.04                                            | 0.97                          | 0.93                                                             | 0.89                                              |
| Rap1b       | 2       | 0.99                                            | 0.98                          | 0.97                                                             | 0.94                                              |
| Sars        | 2       | 1.07                                            | 1.01                          | 1.00                                                             | 0.88                                              |
| Hint1       | 2       | 1.11                                            | 1.08                          | 1.01                                                             | 0.94                                              |
| Map1a       | 2       | 1.97                                            | 0.41                          | 0.46                                                             | 0.23                                              |
| Hyou1       | 2       | 1.21                                            | 0.71                          | 0.85                                                             | 0.71                                              |
| Anp32a      | 2       | 1.13                                            | 0.90                          | 0.96                                                             | 0.70                                              |
| Eif3c/Eif3c | 2       | 1.13                                            | 0.86                          | 0.87                                                             | 0.70                                              |
| Epb41l2     | 2       | 1.35                                            | 0.92                          | 0.98                                                             | 0.70                                              |
| Lonp1       | 2       | 1.29                                            | 0.83                          | 0.91                                                             | 0.74                                              |
| Ssbp1       | 2       | 1.38                                            | 0.85                          | 0.94                                                             | 0.71                                              |
| Cbr1        | 2       | 1.11                                            | 0.83                          | 0.91                                                             | 0.80                                              |
| Rab18       | 2       | 1.06                                            | 0.88                          | 0.90                                                             | 0.79                                              |
| Cdc37       | 2       | 1.31                                            | 0.70                          | 0.78                                                             | 0.53                                              |
| Hepacam     | 2       | 1.23                                            | 0.63                          | 0.85                                                             | 0.51                                              |
| Rgs10       | 2       | 1.05                                            | 0.66                          | 0.67                                                             | 0.50                                              |
| Trim2       | 2       | 1.82                                            | 0.65                          | 0.71                                                             | 0.48                                              |
| Ppp1R9b     | 2       | 1.47                                            | 0.83                          | 1.03                                                             | 0.77                                              |
| Ddx1        | 2       | 1.19                                            | 1.06                          | 1.12                                                             | 0.98                                              |
| Nme1        | 2       | 1.09                                            | 0.98                          | 1.02                                                             | 0.97                                              |
| Cdk5        | 2       | 1.02                                            | 0.91                          | 0.96                                                             | 0.92                                              |
| Ckmt1a/Ck   | 2       | 1.07                                            | 0.89                          | 0.96                                                             | 0.87                                              |
| Cycs        | 2       | 1.06                                            | 0.99                          | 1.00                                                             | 0.95                                              |
| Mrps36      | 2       | 1.95                                            | 0.38                          | 0.57                                                             | 0.60                                              |
| Cend1       | 2       | 1.07                                            | 0.68                          | 0.83                                                             | 0.87                                              |
| Tppp3       | 2       | 1.20                                            | 0.61                          | 0.89                                                             | 0.77                                              |
| Lmnb2       | 2       | 1.37                                            | 0.54                          | 0.81                                                             | 0.81                                              |
| Gap43       | 2       | 1.91                                            | 0.58                          | 0.71                                                             | 0.64                                              |
| Marcks      | 2       | 1.50                                            | 0.48                          | 0.58                                                             | 0.59                                              |
| Vat1L       | 2       | 1.52                                            | 0.53                          | 0.68                                                             | 0.66                                              |
| Ap2M1       | 2       | 1.36                                            | 0.83                          | 1.07                                                             | 0.96                                              |
| Cand1       | 2       | 1.21                                            | 0.91                          | 0.98                                                             | 0.94                                              |
| Csrp1       | 2       | 1.39                                            | 0.86                          | 1.04                                                             | 1.00                                              |
| Dync1Li1    | 2       | 1.16                                            | 0.89                          | 0.95                                                             | 1.01                                              |
| Fdps        | 2       | 1.35                                            | 0.97                          | 1.06                                                             | 1.04                                              |
| Hspa2       | 2       | 1.25                                            | 0.93                          | 1.02                                                             | 0.99                                              |
| Kars        | 2       | 1.34                                            | 0.81                          | 0.92                                                             | 0.91                                              |



Supp. Table 2 (cont.)

| Symbol   | Cluster | WT,<br>developmental<br>myelination<br>response | WT, remyelination<br>response | eIF2B <sup>M</sup> ,<br>developmental<br>myelination<br>response | eIF2B <sup>M</sup> ,<br>remyelination<br>response |
|----------|---------|-------------------------------------------------|-------------------------------|------------------------------------------------------------------|---------------------------------------------------|
| Npepps   | 2       | 1.18                                            | 0.93                          | 1.02                                                             | 1.02                                              |
| Rhoa     | 2       | 1.28                                            | 0.77                          | 0.94                                                             | 0.97                                              |
| Sucla2   | 2       | 1.24                                            | 0.87                          | 0.92                                                             | 0.97                                              |
| Hprt1    | 2       | 1.61                                            | 0.75                          | 0.94                                                             | 0.92                                              |
| Tardbp   | 2       | 1.43                                            | 0.86                          | 0.95                                                             | 1.03                                              |
| Auh      | 2       | 1.58                                            | 0.85                          | 1.09                                                             | 1.16                                              |
| Pls3     | 2       | 1.52                                            | 0.92                          | 1.06                                                             | 1.01                                              |
| Cisd1    | 2       | 1.03                                            | 0.89                          | 0.93                                                             | 0.89                                              |
| Hsp90aa1 | 2       | 1.10                                            | 0.94                          | 0.98                                                             | 0.97                                              |
| Park7    | 2       | 1.12                                            | 0.83                          | 1.00                                                             | 0.94                                              |
| Sfpq     | 2       | 1.14                                            | 0.95                          | 0.98                                                             | 1.00                                              |
| Txn      | 2       | 1.12                                            | 0.92                          | 0.96                                                             | 0.98                                              |
| Ube2n    | 2       | 1.03                                            | 0.92                          | 0.97                                                             | 0.95                                              |
| Dync111  | 2       | 1.08                                            | 0.98                          | 1.01                                                             | 1.02                                              |
| Hspa9    | 2       | 1.10                                            | 0.98                          | 1.02                                                             | 1.03                                              |
| Epb41l3  | 2       | 1.05                                            | 0.79                          | 0.90                                                             | 0.93                                              |
| Aak1     | 2       | 2.94                                            | 0.38                          | 0.31                                                             | 0.42                                              |
| Gprin1   | 2       | 2.87                                            | 0.41                          | 0.27                                                             | 0.34                                              |
| Ncl      | 2       | 5.27                                            | 0.24                          | 0.18                                                             | 0.20                                              |
| Rtn1     | 2       | 2.15                                            | 0.50                          | 0.47                                                             | 0.54                                              |
| Pak1     | 2       | 1.28                                            | 0.87                          | 0.85                                                             | 0.87                                              |
| Synj1    | 2       | 1.17                                            | 0.82                          | 0.82                                                             | 0.86                                              |
| Hsph1    | 2       | 1.41                                            | 0.76                          | 0.73                                                             | 0.81                                              |
| Snap91   | 2       | 1.43                                            | 0.72                          | 0.69                                                             | 0.77                                              |
| Sgip1    | 2       | 1.18                                            | 0.79                          | 0.73                                                             | 0.80                                              |
| Hnrnpu   | 2       | 1.84                                            | 0.59                          | 0.53                                                             | 0.60                                              |
| Map6     | 2       | 2.23                                            | 0.73                          | 0.72                                                             | 0.75                                              |
| Acot13   | 2       | 1.21                                            | 0.97                          | 0.95                                                             | 0.98                                              |
| Hip1r    | 2       | 1.62                                            | 1.00                          | 0.87                                                             | 0.94                                              |
| Map1Lc3a | 2       | 1.32                                            | 1.03                          | 0.98                                                             | 1.01                                              |
| Nckipso  | 2       | 1.60                                            | 0.92                          | 0.86                                                             | 0.97                                              |
| Ppa1     | 2       | 1.12                                            | 0.98                          | 0.96                                                             | 0.99                                              |
| Cap1     | 2       | 2.75                                            | 0.36                          | 0.30                                                             | 0.25                                              |
| Mapre1   | 2       | 1.51                                            | 0.65                          | 0.67                                                             | 0.50                                              |
| Mapre3   | 2       | 1.38                                            | 0.64                          | 0.68                                                             | 0.56                                              |
| Rplp0    | 2       | 1.49                                            | 0.72                          | 0.66                                                             | 0.63                                              |
| Ap3d1    | 2       | 1.49                                            | 0.75                          | 0.70                                                             | 0.67                                              |
| Amph     | 2       | 2.05                                            | 0.57                          | 0.51                                                             | 0.40                                              |
| Fau      | 2       | 1.87                                            | 0.68                          | 0.65                                                             | 0.48                                              |
| Hspa4    | 2       | 1.95                                            | 0.56                          | 0.54                                                             | 0.43                                              |
| Rpl23a   | 2       | 1.32                                            | 0.69                          | 0.66                                                             | 0.62                                              |
| Sparcl1  | 2       | 1.54                                            | 0.64                          | 0.65                                                             | 0.60                                              |
| Dlat     | 2       | 1.95                                            | 0.44                          | 0.48                                                             | 0.41                                              |
| Bpnt1    | 2       | 1.31                                            | 1.02                          | 1.00                                                             | 0.97                                              |
| Srgap3   | 2       | 1.56                                            | 0.93                          | 0.94                                                             | 0.89                                              |
| Prkar2b  | 2       | 1.45                                            | 0.91                          | 0.86                                                             | 0.77                                              |

Supp. Table 2 (cont.)

| Symbol   | Cluster | WT,<br>developmental<br>myelination<br>response | WT, remyelination<br>response | eIF2B <sup>M</sup> ,<br>developmental<br>myelination<br>response | eIF2B <sup>M</sup> ,<br>remyelination<br>response |
|----------|---------|-------------------------------------------------|-------------------------------|------------------------------------------------------------------|---------------------------------------------------|
| Cplx1    | 2       | 1.29                                            | 0.95                          | 0.89                                                             | 0.86                                              |
| Calb1    | 2       | 1.03                                            | 0.89                          | 0.89                                                             | 0.85                                              |
| Bin1     | 2       | 3.30                                            | 0.63                          | 0.25                                                             | 0.24                                              |
| Actr3b   | 2       | 1.24                                            | 0.96                          | 0.64                                                             | 0.75                                              |
| Ap2a1    | 2       | 1.27                                            | 0.88                          | 0.71                                                             | 0.82                                              |
| Epn1     | 2       | 1.25                                            | 0.88                          | 0.65                                                             | 0.77                                              |
| Tceal3   | 2       | 1.11                                            | 0.54                          | 0.41                                                             | 0.46                                              |
| Camkv    | 2       | 1.65                                            | 0.83                          | 0.55                                                             | 0.71                                              |
| Add2     | 2       | 1.47                                            | 0.82                          | 0.58                                                             | 0.67                                              |
| Tceal5   | 2       | 2.11                                            | 0.73                          | 0.52                                                             | 0.52                                              |
| Baiap2   | 2       | 1.47                                            | 1.14                          | 0.89                                                             | 0.88                                              |
| Fabp5    | 2       | 1.31                                            | 1.13                          | 0.88                                                             | 0.90                                              |
| Hnrnp1   | 2       | 1.36                                            | 0.94                          | 0.81                                                             | 0.84                                              |
| Eif4b    | 2       | 1.25                                            | 0.98                          | 0.81                                                             | 0.87                                              |
| Map2k1   | 2       | 1.24                                            | 1.02                          | 0.88                                                             | 0.90                                              |
| Myl6     | 2       | 1.34                                            | 1.01                          | 0.90                                                             | 0.92                                              |
| Dnajc6   | 2       | 1.05                                            | 0.95                          | 0.87                                                             | 0.91                                              |
| Sdha     | 2       | 1.09                                            | 0.96                          | 0.90                                                             | 0.88                                              |
| Snrpd2   | 2       | 1.33                                            | 1.20                          | 1.02                                                             | 1.06                                              |
| Sept11   | 2       | 1.18                                            | 1.08                          | 0.94                                                             | 0.93                                              |
| Map1Lc3b | 2       | 1.21                                            | 1.06                          | 0.95                                                             | 0.98                                              |
| Pabpc1   | 2       | 1.21                                            | 1.07                          | 0.96                                                             | 0.96                                              |
| Mapt     | 2       | 2.02                                            | 0.51                          | 0.49                                                             | 0.83                                              |
| Apoo     | 2       | 1.33                                            | 0.83                          | 0.81                                                             | 0.94                                              |
| Atp1b2   | 2       | 1.21                                            | 0.85                          | 0.83                                                             | 0.92                                              |
| Eif3a    | 2       | 1.33                                            | 0.79                          | 0.79                                                             | 1.01                                              |
| Fxyd6    | 2       | 1.58                                            | 0.66                          | 0.75                                                             | 0.95                                              |
| Slk      | 2       | 1.50                                            | 0.76                          | 0.75                                                             | 0.85                                              |
| Syn2     | 2       | 1.59                                            | 0.69                          | 0.63                                                             | 0.89                                              |
| Ap1b1    | 2       | 1.34                                            | 0.69                          | 0.65                                                             | 0.76                                              |
| Csnk2A1  | 2       | 1.15                                            | 0.73                          | 0.77                                                             | 0.81                                              |
| Oxr1     | 2       | 1.20                                            | 0.74                          | 0.71                                                             | 0.86                                              |
| Rtn3     | 2       | 1.23                                            | 0.75                          | 0.77                                                             | 0.84                                              |
| Tomm70a  | 2       | 1.24                                            | 0.72                          | 0.80                                                             | 0.89                                              |
| Vapa     | 2       | 1.11                                            | 0.69                          | 0.73                                                             | 0.77                                              |
| Wasf1    | 2       | 1.35                                            | 0.67                          | 0.62                                                             | 0.77                                              |
| Atp8     | 2       | 1.16                                            | 0.93                          | 0.96                                                             | 1.00                                              |
| Rpl10a   | 2       | 1.25                                            | 0.88                          | 0.86                                                             | 1.03                                              |
| Tln2     | 2       | 1.60                                            | 0.85                          | 0.83                                                             | 0.99                                              |
| Vapb     | 2       | 1.35                                            | 0.79                          | 0.86                                                             | 0.93                                              |
| Rpl15    | 2       | 1.59                                            | 1.00                          | 0.96                                                             | 1.11                                              |
| Cyfp2    | 2       | 1.10                                            | 0.95                          | 0.92                                                             | 1.00                                              |
| Ywhab    | 2       | 1.09                                            | 0.95                          | 0.97                                                             | 0.99                                              |
| Pdcc6lp  | 2       | 3.02                                            | 0.83                          | 0.43                                                             | 0.93                                              |
| Dbn1     | 2       | 1.40                                            | 0.88                          | 0.72                                                             | 0.85                                              |
| Fam120a  | 2       | 1.51                                            | 0.84                          | 0.63                                                             | 0.83                                              |

Supp. Table 2 (cont.)

| Symbol   | Cluster | WT,<br>developmental<br>myelination<br>response | WT, remyelination<br>response | eIF2B <sup>M</sup> ,<br>developmental<br>myelination<br>response | eIF2B <sup>M</sup> ,<br>remyelination<br>response |
|----------|---------|-------------------------------------------------|-------------------------------|------------------------------------------------------------------|---------------------------------------------------|
| Crip2    | 2       | 1.07                                            | 0.82                          | 0.73                                                             | 0.84                                              |
| Pacs1    | 2       | 1.02                                            | 0.78                          | 0.74                                                             | 0.83                                              |
| Gmfb     | 2       | 1.32                                            | 0.94                          | 0.85                                                             | 1.11                                              |
| Tceb2    | 2       | 1.25                                            | 0.96                          | 0.84                                                             | 0.97                                              |
| Dpysl2   | 2       | 1.08                                            | 0.93                          | 0.88                                                             | 0.93                                              |
| Guk1     | 2       | 1.01                                            | 0.93                          | 0.88                                                             | 0.94                                              |
| Sept5    | 2       | 1.08                                            | 0.99                          | 0.92                                                             | 1.03                                              |
| Ahcyl1   | 2       | 1.15                                            | 1.00                          | 0.95                                                             | 1.04                                              |
| Cul5     | 2       | 1.11                                            | 1.00                          | 0.96                                                             | 1.03                                              |
| Eif4e    | 2       | 1.18                                            | 1.00                          | 0.96                                                             | 1.07                                              |
| Hsp90ab1 | 2       | 1.05                                            | 1.00                          | 0.95                                                             | 0.99                                              |
| Nme2     | 2       | 1.09                                            | 1.05                          | 1.02                                                             | 1.06                                              |
| Sptbn1   | 2       | 1.05                                            | 1.01                          | 0.97                                                             | 1.01                                              |
| Atp5e    | 2       | 1.02                                            | 0.87                          | 0.81                                                             | 0.91                                              |
| Matr3    | 2       | 1.14                                            | 0.90                          | 0.79                                                             | 0.92                                              |
| Napb     | 2       | 1.16                                            | 0.91                          | 0.86                                                             | 0.97                                              |
| Ppp1ca   | 2       | 1.18                                            | 0.96                          | 0.82                                                             | 0.95                                              |
| Caskin1  | 3       | 1.80                                            | 0.97                          | 0.33                                                             | 0.89                                              |
| Sec22b   | 3       | 1.00                                            | 0.81                          | 0.64                                                             | 0.79                                              |
| Bsn      | 3       | 1.70                                            | 1.24                          | 0.64                                                             | 0.92                                              |
| Ctnn     | 3       | 1.42                                            | 1.09                          | 0.72                                                             | 0.89                                              |
| Dnaja2   | 3       | 1.41                                            | 1.02                          | 0.66                                                             | 0.84                                              |
| Hnrpll   | 3       | 1.60                                            | 1.11                          | 0.67                                                             | 0.90                                              |
| Ipo7     | 3       | 0.94                                            | 0.99                          | 0.77                                                             | 0.87                                              |
| Ugp2     | 3       | 1.02                                            | 0.99                          | 0.94                                                             | 1.00                                              |
| Sept7    | 3       | 1.04                                            | 1.08                          | 0.89                                                             | 0.99                                              |
| Sept9    | 3       | 1.16                                            | 1.11                          | 0.82                                                             | 1.11                                              |
| Atp6v1h  | 3       | 1.03                                            | 1.08                          | 0.80                                                             | 1.03                                              |
| Dclk1    | 3       | 1.12                                            | 1.05                          | 0.94                                                             | 1.00                                              |
| Epb41l1  | 3       | 1.12                                            | 1.01                          | 0.88                                                             | 1.05                                              |
| Fscn1    | 3       | 1.12                                            | 1.06                          | 0.95                                                             | 1.03                                              |
| Ipo5     | 3       | 1.07                                            | 1.07                          | 0.97                                                             | 1.01                                              |
| Lancl2   | 3       | 1.03                                            | 1.03                          | 0.83                                                             | 1.01                                              |
| Pgm2l1   | 3       | 1.11                                            | 1.13                          | 0.94                                                             | 1.05                                              |
| Ppp2r1a  | 3       | 1.03                                            | 1.01                          | 0.82                                                             | 1.00                                              |
| Rock2    | 3       | 1.08                                            | 1.04                          | 0.88                                                             | 0.93                                              |
| Rpl7a    | 3       | 1.08                                            | 0.99                          | 0.84                                                             | 0.94                                              |
| Rps15a   | 3       | 1.12                                            | 1.10                          | 0.90                                                             | 1.10                                              |
| Snap25   | 3       | 1.07                                            | 1.00                          | 0.90                                                             | 0.99                                              |
| Vars     | 3       | 1.09                                            | 1.03                          | 0.82                                                             | 0.97                                              |
| Kif21a   | 3       | 1.12                                            | 0.95                          | 0.74                                                             | 0.89                                              |
| Scamp1   | 3       | 1.06                                            | 0.97                          | 0.75                                                             | 0.99                                              |
| Lrrc57   | 3       | 1.05                                            | 0.96                          | 0.64                                                             | 0.95                                              |
| Snca     | 3       | 1.25                                            | 3.06                          | 0.92                                                             | 0.94                                              |
| Syn1     | 3       | 1.26                                            | 1.17                          | 0.34                                                             | 0.38                                              |
| Sirpa    | 3       | 0.98                                            | 0.93                          | 0.56                                                             | 0.50                                              |

Supp. Table 2 (cont.)

| Symbol    | Cluster | WT,<br>developmental<br>myelination<br>response | WT, remyelination<br>response | eIF2B <sup>M</sup> ,<br>developmental<br>myelination<br>response | eIF2B <sup>M</sup> ,<br>remyelination<br>response |
|-----------|---------|-------------------------------------------------|-------------------------------|------------------------------------------------------------------|---------------------------------------------------|
| Ptk2b     | 3       | 1.02                                            | 0.97                          | 0.77                                                             | 0.74                                              |
| Slc25a13  | 3       | 1.00                                            | 1.07                          | 0.84                                                             | 0.79                                              |
| Tmsb10/Tr | 3       | 0.91                                            | 1.01                          | 0.71                                                             | 0.63                                              |
| Cct4      | 3       | 1.11                                            | 1.14                          | 0.95                                                             | 0.84                                              |
| Ctla      | 3       | 1.21                                            | 1.17                          | 0.97                                                             | 0.92                                              |
| Dpp6      | 3       | 1.26                                            | 1.35                          | 1.03                                                             | 0.81                                              |
| Gda       | 3       | 1.09                                            | 1.22                          | 0.87                                                             | 0.84                                              |
| Gng2      | 3       | 1.41                                            | 1.64                          | 1.07                                                             | 0.73                                              |
| Mink1     | 3       | 1.05                                            | 1.29                          | 0.77                                                             | 0.86                                              |
| Iqsec1    | 3       | 1.36                                            | 1.20                          | 0.78                                                             | 0.81                                              |
| Lmnb1     | 3       | 1.41                                            | 1.50                          | 0.59                                                             | 0.70                                              |
| Mras      | 3       | 1.11                                            | 1.16                          | 0.86                                                             | 0.77                                              |
| Phpt1     | 3       | 1.09                                            | 1.13                          | 0.77                                                             | 0.82                                              |
| Yars      | 3       | 1.11                                            | 1.09                          | 0.80                                                             | 0.77                                              |
| Adam23    | 3       | 0.96                                            | 1.04                          | 0.89                                                             | 0.85                                              |
| Acyp1     | 3       | 1.00                                            | 1.17                          | 0.91                                                             | 0.92                                              |
| Ctnna2    | 3       | 1.12                                            | 1.23                          | 1.05                                                             | 0.96                                              |
| Pfn1      | 3       | 1.04                                            | 1.36                          | 0.93                                                             | 0.92                                              |
| Rpl8      | 3       | 1.01                                            | 1.21                          | 0.91                                                             | 0.86                                              |
| Vamp2     | 3       | 1.08                                            | 1.19                          | 1.00                                                             | 0.94                                              |
| Ap2b1     | 3       | 1.05                                            | 1.05                          | 1.01                                                             | 1.00                                              |
| Dnm1      | 3       | 1.05                                            | 1.07                          | 1.02                                                             | 1.02                                              |
| Fus       | 3       | 1.09                                            | 1.09                          | 0.97                                                             | 0.90                                              |
| Gdi2      | 3       | 1.07                                            | 1.10                          | 1.03                                                             | 1.02                                              |
| Gnao1     | 3       | 1.07                                            | 1.05                          | 0.95                                                             | 0.93                                              |
| Hpcal4    | 3       | 1.04                                            | 1.11                          | 0.82                                                             | 0.91                                              |
| Mtpn      | 3       | 1.03                                            | 1.12                          | 0.84                                                             | 0.91                                              |
| Slc3a2    | 3       | 0.99                                            | 1.05                          | 0.96                                                             | 0.96                                              |
| Erc2      | 4       | 0.99                                            | 1.54                          | 0.97                                                             | 1.14                                              |
| Pfkl      | 4       | 1.05                                            | 1.46                          | 1.03                                                             | 1.09                                              |
| Gria2     | 4       | 0.88                                            | 1.22                          | 0.92                                                             | 1.14                                              |
| Nudt21    | 4       | 0.86                                            | 1.20                          | 0.95                                                             | 1.10                                              |
| Aldh2     | 4       | 0.95                                            | 1.11                          | 0.62                                                             | 0.84                                              |
| Cpne6     | 4       | 0.89                                            | 1.19                          | 0.70                                                             | 0.88                                              |
| Dnm1l     | 4       | 0.98                                            | 1.02                          | 0.95                                                             | 0.97                                              |
| Rpl35     | 4       | 0.91                                            | 1.05                          | 0.83                                                             | 0.87                                              |
| Camk2g    | 4       | 0.95                                            | 1.20                          | 0.92                                                             | 1.04                                              |
| Cnrip1    | 4       | 1.03                                            | 1.23                          | 0.93                                                             | 1.02                                              |
| Dync1h1   | 4       | 0.99                                            | 1.17                          | 1.03                                                             | 1.07                                              |
| Pfn2      | 4       | 1.12                                            | 1.44                          | 0.87                                                             | 1.23                                              |
| Plec      | 4       | 1.03                                            | 1.23                          | 0.93                                                             | 1.10                                              |
| Ppp3r1    | 4       | 1.07                                            | 1.22                          | 0.91                                                             | 1.07                                              |
| Psm2      | 4       | 0.95                                            | 1.18                          | 0.93                                                             | 0.98                                              |
| Rab1b     | 4       | 1.00                                            | 1.18                          | 0.94                                                             | 1.00                                              |
| Rps23     | 4       | 1.05                                            | 1.31                          | 0.93                                                             | 1.13                                              |
| Uqcrb     | 4       | 1.03                                            | 1.16                          | 0.97                                                             | 1.00                                              |

Supp. Table 2 (cont.)

| Symbol   | Cluster | WT,<br>developmental<br>myelination<br>response | WT, remyelination<br>response | eIF2B <sup>M</sup> ,<br>developmental<br>myelination<br>response | eIF2B <sup>M</sup> ,<br>remyelination<br>response |
|----------|---------|-------------------------------------------------|-------------------------------|------------------------------------------------------------------|---------------------------------------------------|
| Actr1b   | 4       | 0.95                                            | 1.08                          | 0.92                                                             | 1.01                                              |
| Arpc2    | 4       | 0.98                                            | 1.08                          | 0.85                                                             | 1.03                                              |
| Atl1     | 4       | 0.76                                            | 1.27                          | 0.70                                                             | 1.07                                              |
| Cntnap2  | 4       | 0.89                                            | 1.07                          | 0.87                                                             | 0.96                                              |
| Exoc4    | 4       | 0.92                                            | 1.12                          | 0.92                                                             | 0.92                                              |
| Gpm6a    | 4       | 0.93                                            | 1.14                          | 0.98                                                             | 1.09                                              |
| Hnrnpa1  | 4       | 0.88                                            | 1.10                          | 0.85                                                             | 1.02                                              |
| Hnrnpk   | 4       | 1.03                                            | 1.08                          | 0.89                                                             | 0.99                                              |
| Hpca     | 4       | 0.91                                            | 1.17                          | 0.84                                                             | 1.06                                              |
| Nckap1   | 4       | 1.05                                            | 1.12                          | 0.93                                                             | 1.09                                              |
| Oxct1    | 4       | 1.01                                            | 1.13                          | 0.95                                                             | 1.09                                              |
| Pfkm     | 4       | 1.05                                            | 1.16                          | 0.91                                                             | 1.17                                              |
| Rpl38    | 4       | 0.97                                            | 1.17                          | 0.95                                                             | 1.04                                              |
| Rps20    | 4       | 1.08                                            | 1.21                          | 0.77                                                             | 1.14                                              |
| Tubb     | 4       | 0.97                                            | 1.12                          | 0.94                                                             | 1.08                                              |
| Xpo7     | 4       | 0.86                                            | 1.15                          | 0.72                                                             | 1.09                                              |
| Cacna2d3 | 5       | 0.57                                            | 1.29                          | 0.81                                                             | 0.98                                              |
| Cox6b1   | 5       | 0.65                                            | 0.95                          | 1.02                                                             | 0.94                                              |
| Ap2s1    | 5       | 0.92                                            | 1.21                          | 1.12                                                             | 1.15                                              |
| Cntn1    | 5       | 0.78                                            | 1.20                          | 1.13                                                             | 1.03                                              |
| Fam213a  | 5       | 0.99                                            | 1.40                          | 1.27                                                             | 1.31                                              |
| Gpm6b    | 5       | 0.84                                            | 1.29                          | 0.99                                                             | 0.99                                              |
| Pfkp     | 5       | 0.93                                            | 1.19                          | 1.04                                                             | 1.08                                              |
| Rab35    | 5       | 0.87                                            | 1.33                          | 1.18                                                             | 1.16                                              |
| Rasal1   | 5       | 0.82                                            | 1.18                          | 0.99                                                             | 0.99                                              |
| Sfn      | 5       | 0.97                                            | 1.26                          | 1.13                                                             | 1.22                                              |
| Wdr1     | 5       | 0.84                                            | 1.26                          | 1.05                                                             | 1.09                                              |
| Atp6v1b2 | 5       | 0.85                                            | 1.12                          | 1.06                                                             | 1.10                                              |
| Ntm      | 5       | 0.82                                            | 1.07                          | 1.07                                                             | 1.05                                              |
| Psm11    | 5       | 0.80                                            | 1.16                          | 1.07                                                             | 1.11                                              |
| Rac1     | 5       | 0.82                                            | 1.13                          | 1.15                                                             | 1.08                                              |
| Ran      | 5       | 0.82                                            | 1.05                          | 1.13                                                             | 1.03                                              |
| Rpsa     | 5       | 0.85                                            | 1.12                          | 1.01                                                             | 1.06                                              |
| Syp      | 5       | 0.79                                            | 1.06                          | 1.24                                                             | 1.04                                              |
| Tnr      | 5       | 0.86                                            | 1.09                          | 1.09                                                             | 1.04                                              |
| Aco2     | 5       | 0.96                                            | 1.05                          | 1.08                                                             | 1.01                                              |
| Cadm3    | 5       | 0.88                                            | 0.96                          | 1.00                                                             | 0.94                                              |
| Eif5a    | 5       | 0.84                                            | 0.97                          | 1.01                                                             | 0.90                                              |
| Sh3gl2   | 5       | 0.93                                            | 1.04                          | 0.99                                                             | 0.99                                              |
| Sptan1   | 5       | 0.93                                            | 1.08                          | 0.99                                                             | 0.94                                              |
| Arhgef2  | 5       | 0.82                                            | 1.12                          | 0.94                                                             | 0.87                                              |
| Prkce    | 5       | 0.92                                            | 1.21                          | 0.97                                                             | 0.96                                              |
| Atp6v1g2 | 5       | 0.99                                            | 1.09                          | 1.03                                                             | 1.03                                              |
| Prdx6    | 5       | 0.96                                            | 1.12                          | 1.06                                                             | 1.03                                              |
| Ywhae    | 5       | 0.97                                            | 1.04                          | 0.99                                                             | 0.99                                              |
| Ywhaz    | 5       | 0.94                                            | 1.09                          | 1.06                                                             | 1.05                                              |

Supp. Table 2 (cont.)

| Symbol   | Cluster | WT,<br>developmental<br>myelination<br>response | WT, remyelination<br>response | eIF2B <sup>M</sup> ,<br>developmental<br>myelination<br>response | eIF2B <sup>M</sup> ,<br>remyelination<br>response |
|----------|---------|-------------------------------------------------|-------------------------------|------------------------------------------------------------------|---------------------------------------------------|
| Cab39    | 6       | 0.96                                            | 1.50                          | 1.29                                                             | 0.98                                              |
| Dlg4     | 6       | 0.86                                            | 1.23                          | 1.17                                                             | 1.00                                              |
| Rab39A   | 6       | 0.87                                            | 1.49                          | 1.10                                                             | 1.02                                              |
| Cacna2d1 | 6       | 0.70                                            | 1.09                          | 1.08                                                             | 0.90                                              |
| Ctsb     | 6       | 0.78                                            | 1.27                          | 1.22                                                             | 0.85                                              |
| Ddb1     | 6       | 0.88                                            | 1.20                          | 1.09                                                             | 0.90                                              |
| Ola1     | 6       | 0.82                                            | 1.19                          | 1.03                                                             | 0.91                                              |
| Psma6    | 6       | 0.84                                            | 1.15                          | 1.04                                                             | 0.86                                              |
| Syt1     | 6       | 0.81                                            | 1.14                          | 1.03                                                             | 0.86                                              |
| Uba1     | 6       | 0.87                                            | 1.12                          | 1.05                                                             | 0.90                                              |
| Usp7     | 6       | 0.87                                            | 1.12                          | 1.11                                                             | 0.94                                              |
| Sar1a    | 6       | 0.76                                            | 1.01                          | 1.04                                                             | 0.94                                              |
| Tst      | 6       | 0.82                                            | 1.09                          | 1.03                                                             | 0.90                                              |
| Sept6    | 6       | 0.93                                            | 1.12                          | 1.01                                                             | 0.94                                              |
| Atp6v1a  | 6       | 0.95                                            | 1.12                          | 1.05                                                             | 0.97                                              |
| Ezr      | 6       | 0.96                                            | 1.11                          | 0.96                                                             | 0.61                                              |
| Hmgb1    | 6       | 0.86                                            | 1.15                          | 0.91                                                             | 0.47                                              |
| Psma3    | 6       | 0.90                                            | 1.11                          | 0.93                                                             | 0.66                                              |
| Stx1a    | 6       | 0.90                                            | 1.22                          | 0.88                                                             | 0.60                                              |
| Uso1     | 6       | 0.82                                            | 1.12                          | 0.79                                                             | 0.54                                              |
| Actc1    | 6       | 0.99                                            | 1.10                          | 1.07                                                             | 0.95                                              |
| Anxa6    | 6       | 0.99                                            | 1.04                          | 1.00                                                             | 0.84                                              |
| Atp6v1d  | 6       | 0.90                                            | 1.00                          | 1.00                                                             | 0.86                                              |
| Dstn     | 6       | 0.96                                            | 1.00                          | 0.98                                                             | 0.94                                              |
| Eef1b2   | 6       | 1.02                                            | 1.04                          | 1.02                                                             | 0.95                                              |
| Ehd3     | 6       | 0.93                                            | 1.00                          | 1.02                                                             | 0.85                                              |
| Gdi1     | 6       | 0.98                                            | 1.03                          | 1.03                                                             | 0.93                                              |
| Got1     | 6       | 0.98                                            | 1.05                          | 1.02                                                             | 0.91                                              |
| Hdhd2    | 6       | 0.97                                            | 0.99                          | 0.96                                                             | 0.83                                              |
| Hspa5    | 6       | 0.97                                            | 1.03                          | 1.02                                                             | 0.93                                              |
| Impa1    | 6       | 0.97                                            | 1.07                          | 0.97                                                             | 0.90                                              |
| Mdh1     | 6       | 0.92                                            | 1.04                          | 1.03                                                             | 0.89                                              |
| Nfasc    | 6       | 0.98                                            | 1.04                          | 1.00                                                             | 0.92                                              |
| Rab11b   | 6       | 0.99                                            | 1.04                          | 0.99                                                             | 0.90                                              |
| Rab7a    | 6       | 0.98                                            | 1.05                          | 1.03                                                             | 0.96                                              |
| Alcam    | 6       | 0.81                                            | 1.34                          | 1.04                                                             | 0.72                                              |
| Cadm2    | 6       | 0.91                                            | 1.12                          | 1.06                                                             | 0.79                                              |
| Calr     | 6       | 0.91                                            | 1.33                          | 0.97                                                             | 0.68                                              |
| Camk2a   | 6       | 0.98                                            | 1.38                          | 1.25                                                             | 0.78                                              |
| Capza2   | 6       | 0.94                                            | 1.12                          | 1.08                                                             | 0.92                                              |
| Crym     | 6       | 0.94                                            | 1.11                          | 0.99                                                             | 0.89                                              |
| Cyb5r3   | 6       | 0.95                                            | 1.08                          | 1.06                                                             | 0.69                                              |
| Eno1     | 6       | 0.91                                            | 1.10                          | 1.08                                                             | 0.78                                              |
| Glod4    | 6       | 1.02                                            | 1.18                          | 1.13                                                             | 0.75                                              |
| Hagh     | 6       | 1.00                                            | 1.34                          | 1.14                                                             | 0.75                                              |
| Map2     | 6       | 0.96                                            | 1.16                          | 1.01                                                             | 0.80                                              |

Supp. Table 2 (cont.)

| Symbol    | Cluster | WT,<br>developmental<br>myelination<br>response | WT, remyelination<br>response | eIF2B <sup>M</sup> ,<br>developmental<br>myelination<br>response | eIF2B <sup>M</sup> ,<br>remyelination<br>response |
|-----------|---------|-------------------------------------------------|-------------------------------|------------------------------------------------------------------|---------------------------------------------------|
| Ncald     | 6       | 0.90                                            | 1.21                          | 0.96                                                             | 0.88                                              |
| Nrcam     | 6       | 0.91                                            | 1.33                          | 1.14                                                             | 0.73                                              |
| Psm1      | 6       | 0.92                                            | 1.12                          | 1.17                                                             | 0.64                                              |
| Psm2      | 6       | 0.97                                            | 1.18                          | 1.04                                                             | 0.86                                              |
| Psm7      | 6       | 0.92                                            | 1.20                          | 1.09                                                             | 0.79                                              |
| Psm3      | 6       | 1.01                                            | 1.19                          | 1.03                                                             | 0.84                                              |
| Psm4      | 6       | 1.01                                            | 1.12                          | 1.10                                                             | 0.87                                              |
| Rab3a     | 6       | 0.97                                            | 1.11                          | 1.02                                                             | 0.85                                              |
| Rab3d     | 6       | 0.94                                            | 1.09                          | 1.01                                                             | 0.85                                              |
| Rgs7      | 6       | 0.90                                            | 1.10                          | 0.98                                                             | 0.81                                              |
| Snd1      | 6       | 0.98                                            | 1.06                          | 1.03                                                             | 0.81                                              |
| Stmn1     | 6       | 0.96                                            | 1.16                          | 1.05                                                             | 0.92                                              |
| Timm9     | 6       | 0.97                                            | 1.14                          | 1.05                                                             | 0.89                                              |
| Tmem65    | 6       | 1.02                                            | 1.26                          | 1.15                                                             | 0.78                                              |
| Tpm1      | 6       | 0.95                                            | 1.12                          | 1.18                                                             | 0.70                                              |
| Tpm3      | 6       | 1.00                                            | 1.12                          | 1.00                                                             | 0.77                                              |
| Vcp       | 6       | 0.87                                            | 1.11                          | 1.08                                                             | 0.82                                              |
| Lmna      | 6       | 0.83                                            | 1.02                          | 0.95                                                             | 0.77                                              |
| Coro1a    | 6       | 1.07                                            | 1.24                          | 1.04                                                             | 0.96                                              |
| Hnrnpa2b1 | 6       | 1.04                                            | 1.27                          | 1.05                                                             | 1.01                                              |
| Rps19     | 6       | 1.09                                            | 1.16                          | 1.06                                                             | 0.94                                              |
| Sncb      | 6       | 1.06                                            | 1.18                          | 1.09                                                             | 1.06                                              |
| Gpd2      | 6       | 1.01                                            | 1.12                          | 1.05                                                             | 1.01                                              |
| Ptms      | 6       | 1.00                                            | 1.13                          | 1.02                                                             | 1.00                                              |
| Atp5l     | 6       | 0.92                                            | 1.03                          | 1.11                                                             | 0.97                                              |
| Cyb5b     | 6       | 0.96                                            | 1.02                          | 1.11                                                             | 0.93                                              |
| Hspa8     | 6       | 0.98                                            | 1.05                          | 1.08                                                             | 0.99                                              |
| Pin1      | 6       | 0.90                                            | 1.00                          | 1.21                                                             | 0.90                                              |
| Stip1     | 6       | 0.95                                            | 1.02                          | 1.04                                                             | 0.95                                              |
| Actn1     | 6       | 0.80                                            | 1.22                          | 1.41                                                             | 0.78                                              |
| Actn4     | 6       | 0.82                                            | 1.18                          | 1.34                                                             | 0.68                                              |
| Anxa5     | 6       | 0.87                                            | 1.09                          | 1.14                                                             | 0.76                                              |
| C1Qbp     | 6       | 0.92                                            | 1.00                          | 1.09                                                             | 0.73                                              |
| Camk2b    | 6       | 0.95                                            | 1.13                          | 1.14                                                             | 0.87                                              |
| Dpp10     | 6       | 0.74                                            | 1.19                          | 1.53                                                             | 0.91                                              |
| Eef2      | 6       | 0.91                                            | 1.09                          | 1.12                                                             | 0.94                                              |
| Hibadh    | 6       | 0.97                                            | 1.07                          | 1.43                                                             | 0.78                                              |
| Kpnb1     | 6       | 0.99                                            | 1.07                          | 1.15                                                             | 0.87                                              |
| Mcts1     | 6       | 0.87                                            | 1.24                          | 1.32                                                             | 0.74                                              |
| Mdh2      | 6       | 0.89                                            | 1.06                          | 1.20                                                             | 0.86                                              |
| Pgam1     | 6       | 0.90                                            | 1.06                          | 1.09                                                             | 0.85                                              |
| Ppia      | 6       | 0.95                                            | 1.11                          | 1.12                                                             | 0.94                                              |
| Psm1      | 6       | 0.82                                            | 1.08                          | 1.10                                                             | 0.84                                              |
| Psm5      | 6       | 0.94                                            | 1.06                          | 1.13                                                             | 0.87                                              |
| Sod1      | 6       | 0.96                                            | 1.07                          | 1.23                                                             | 0.83                                              |
| Syncrip   | 6       | 0.75                                            | 1.07                          | 1.64                                                             | 0.88                                              |

Supp. Table 2 (cont.)

| Symbol  | Cluster | WT,<br>developmental<br>myelination<br>response | WT, remyelination<br>response | eIF2B <sup>M</sup> ,<br>developmental<br>myelination<br>response | eIF2B <sup>M</sup> ,<br>remyelination<br>response |
|---------|---------|-------------------------------------------------|-------------------------------|------------------------------------------------------------------|---------------------------------------------------|
| Tkt     | 6       | 0.93                                            | 1.09                          | 1.15                                                             | 0.86                                              |
| Cd47    | 6       | 0.76                                            | 1.02                          | 1.30                                                             | 0.98                                              |
| Dld     | 6       | 0.95                                            | 1.02                          | 1.07                                                             | 0.87                                              |
| Eno2    | 6       | 0.90                                            | 1.02                          | 1.09                                                             | 0.80                                              |
| Tpi1    | 6       | 0.89                                            | 1.02                          | 1.10                                                             | 0.92                                              |
| L1Cam   | 7       | 0.81                                            | 0.97                          | 1.08                                                             | 0.58                                              |
| Aldh1l1 | 7       | 1.04                                            | 1.08                          | 1.40                                                             | 0.96                                              |
| Rab5c   | 7       | 0.98                                            | 1.13                          | 1.16                                                             | 1.02                                              |
| Capzb   | 7       | 1.05                                            | 1.09                          | 1.13                                                             | 1.00                                              |
| Eci1    | 7       | 0.91                                            | 0.90                          | 1.23                                                             | 0.82                                              |
| Hsp90b1 | 7       | 1.01                                            | 1.02                          | 1.10                                                             | 1.03                                              |
| Hspe1   | 7       | 0.98                                            | 0.98                          | 1.13                                                             | 0.85                                              |
| Idh3g   | 7       | 0.99                                            | 0.98                          | 1.13                                                             | 0.90                                              |
| Ntrk2   | 7       | 0.90                                            | 1.03                          | 1.22                                                             | 1.01                                              |
| Pgm1    | 7       | 0.92                                            | 0.89                          | 1.17                                                             | 0.85                                              |
| Prdx5   | 7       | 0.97                                            | 0.94                          | 1.16                                                             | 0.94                                              |
| Psma5   | 7       | 0.94                                            | 0.99                          | 1.10                                                             | 0.87                                              |
| Sod2    | 7       | 0.98                                            | 0.94                          | 1.20                                                             | 0.97                                              |
| Atp5b   | 7       | 0.91                                            | 0.97                          | 1.04                                                             | 0.87                                              |
| Atp5j   | 7       | 0.90                                            | 0.91                          | 1.02                                                             | 0.87                                              |
| Canx    | 7       | 0.90                                            | 0.90                          | 1.07                                                             | 0.80                                              |
| Eea1    | 7       | 0.91                                            | 0.91                          | 1.01                                                             | 0.84                                              |
| Glo1    | 7       | 0.95                                            | 0.99                          | 1.06                                                             | 0.86                                              |
| Gpi     | 7       | 0.94                                            | 0.99                          | 1.07                                                             | 0.88                                              |
| Letm1   | 7       | 0.92                                            | 0.93                          | 1.03                                                             | 0.86                                              |
| Myo5a   | 7       | 1.00                                            | 1.01                          | 1.03                                                             | 1.01                                              |
| Rab3b   | 7       | 0.89                                            | 0.92                          | 0.97                                                             | 0.81                                              |
| Taldo1  | 7       | 0.87                                            | 0.96                          | 1.06                                                             | 0.93                                              |
| Dbi     | 7       | 0.84                                            | 0.97                          | 1.43                                                             | 0.80                                              |
| Pak3    | 7       | 0.78                                            | 0.99                          | 1.16                                                             | 0.67                                              |
| Ncam1   | 7       | 0.84                                            | 0.95                          | 1.15                                                             | 0.81                                              |
| Sec31a  | 8       | 1.27                                            | 0.45                          | 0.76                                                             | 1.00                                              |
| Ctsd    | 8       | 1.15                                            | 0.55                          | 0.93                                                             | 1.12                                              |
| Ykt6    | 8       | 0.98                                            | 0.45                          | 0.86                                                             | 1.06                                              |
| Cfl2    | 8       | 1.15                                            | 0.63                          | 1.05                                                             | 1.11                                              |
| Pc      | 8       | 1.25                                            | 0.84                          | 1.00                                                             | 1.08                                              |
| Acsl6   | 8       | 1.29                                            | 0.90                          | 1.12                                                             | 1.17                                              |
| Echs1   | 8       | 1.07                                            | 0.90                          | 1.09                                                             | 1.02                                              |
| Aldoc   | 8       | 0.99                                            | 0.90                          | 1.01                                                             | 0.97                                              |
| Arl3    | 8       | 1.04                                            | 0.76                          | 0.94                                                             | 0.89                                              |
| Atp5a1  | 8       | 1.00                                            | 0.86                          | 0.98                                                             | 1.03                                              |
| Dpysl5  | 8       | 1.06                                            | 0.85                          | 0.97                                                             | 1.02                                              |
| Eef1a1  | 8       | 1.00                                            | 0.84                          | 0.98                                                             | 1.00                                              |
| Gnai2   | 8       | 1.04                                            | 0.78                          | 1.01                                                             | 0.99                                              |
| Pdha1   | 8       | 1.01                                            | 0.83                          | 0.99                                                             | 1.03                                              |
| Suclg1  | 8       | 1.04                                            | 0.88                          | 0.99                                                             | 1.04                                              |



Supp. Table 2 (cont.)

| Symbol   | Cluster | WT,<br>developmental<br>myelination<br>response | WT, remyelination<br>response | eIF2B <sup>M</sup> ,<br>developmental<br>myelination<br>response | eIF2B <sup>M</sup> ,<br>remyelination<br>response |
|----------|---------|-------------------------------------------------|-------------------------------|------------------------------------------------------------------|---------------------------------------------------|
| Cd81     | 8       | 1.17                                            | 0.85                          | 1.06                                                             | 1.22                                              |
| Dnm3     | 8       | 1.11                                            | 0.85                          | 1.07                                                             | 1.06                                              |
| Gstm5    | 8       | 1.08                                            | 0.93                          | 1.04                                                             | 1.08                                              |
| Ndr2     | 8       | 1.10                                            | 0.85                          | 1.15                                                             | 1.12                                              |
| Rpl31    | 8       | 1.10                                            | 0.90                          | 1.02                                                             | 1.09                                              |
| Tcp1     | 8       | 1.21                                            | 1.00                          | 1.13                                                             | 1.18                                              |
| Usmg5    | 8       | 1.12                                            | 1.00                          | 1.09                                                             | 1.08                                              |
| Grb2     | 8       | 1.05                                            | 0.76                          | 0.88                                                             | 0.96                                              |
| Slc25a3  | 8       | 1.09                                            | 0.72                          | 0.94                                                             | 0.95                                              |
| Slc25a6  | 8       | 1.05                                            | 0.66                          | 0.91                                                             | 0.99                                              |
| Acyp2    | 9       | 0.90                                            | 0.79                          | 1.09                                                             | 1.03                                              |
| Chchd3   | 9       | 0.85                                            | 0.70                          | 1.16                                                             | 1.30                                              |
| Dpysl3   | 9       | 0.96                                            | 0.76                          | 1.05                                                             | 1.08                                              |
| Hsd17b12 | 9       | 0.90                                            | 0.87                          | 1.07                                                             | 1.09                                              |
| Ppp1r7   | 9       | 0.93                                            | 0.80                          | 1.16                                                             | 1.14                                              |
| Rhog     | 9       | 1.02                                            | 0.71                          | 1.15                                                             | 1.30                                              |
| Slc4a4   | 9       | 0.84                                            | 0.66                          | 1.10                                                             | 1.24                                              |
| Vamp1    | 9       | 0.91                                            | 0.69                          | 0.98                                                             | 1.09                                              |
| Vdac3    | 9       | 0.84                                            | 0.77                          | 1.20                                                             | 1.11                                              |
| Sncg     | 9       | 1.09                                            | 0.61                          | 1.35                                                             | 1.42                                              |
| Acadvl   | 9       | 1.05                                            | 0.96                          | 1.13                                                             | 1.06                                              |
| Aldh5a1  | 9       | 1.01                                            | 0.93                          | 1.07                                                             | 1.01                                              |
| Copa     | 9       | 0.94                                            | 0.85                          | 1.37                                                             | 1.11                                              |
| Coro1c   | 9       | 0.89                                            | 0.81                          | 1.24                                                             | 0.94                                              |
| Glud1    | 9       | 1.05                                            | 1.00                          | 1.21                                                             | 1.08                                              |
| Hspa4l   | 9       | 1.02                                            | 0.94                          | 1.13                                                             | 1.02                                              |
| Slc2a3   | 9       | 1.23                                            | 0.88                          | 1.43                                                             | 1.16                                              |
| Atp5h    | 9       | 0.93                                            | 0.89                          | 1.02                                                             | 1.01                                              |
| Bphl     | 9       | 0.90                                            | 0.90                          | 1.00                                                             | 0.99                                              |
| Cadps    | 9       | 0.95                                            | 0.91                          | 1.05                                                             | 0.96                                              |
| Hspd1    | 9       | 0.89                                            | 0.93                          | 1.09                                                             | 1.00                                              |
| Mtx2     | 9       | 0.92                                            | 0.85                          | 1.00                                                             | 0.98                                              |
| Ndufv1   | 9       | 0.85                                            | 0.86                          | 0.92                                                             | 0.89                                              |
| Pcmt1    | 9       | 0.99                                            | 0.97                          | 1.01                                                             | 1.01                                              |
| Pkm2     | 9       | 0.95                                            | 0.92                          | 1.00                                                             | 0.97                                              |
| Rab3C    | 9       | 0.90                                            | 0.95                          | 1.08                                                             | 1.01                                              |
| Ywhag    | 9       | 0.94                                            | 0.92                          | 1.00                                                             | 0.98                                              |
| Atp1a2   | 9       | 0.97                                            | 0.90                          | 1.21                                                             | 1.23                                              |
| Ckb      | 9       | 0.98                                            | 0.98                          | 1.05                                                             | 1.06                                              |
| Ube2l3   | 9       | 0.96                                            | 0.90                          | 1.18                                                             | 1.19                                              |
| Ywhaq    | 9       | 0.97                                            | 0.92                          | 1.04                                                             | 1.07                                              |
| Rps16    | 9       | 1.10                                            | 1.02                          | 1.28                                                             | 1.27                                              |
| Ranbp1   | 10      | 4.73                                            | 0.27                          | 1.87                                                             | 0.24                                              |
| Abat     | 10      | 1.19                                            | 0.84                          | 1.16                                                             | 0.84                                              |
| Calb2    | 10      | 1.17                                            | 0.58                          | 1.30                                                             | 0.84                                              |
| Ddah1    | 10      | 1.12                                            | 0.90                          | 1.06                                                             | 0.80                                              |

Supp. Table 2 (cont.)

| Symbol   | Cluster | WT,<br>developmental<br>myelination<br>response | WT, remyelination<br>response | eIF2B <sup>M</sup> ,<br>developmental<br>myelination<br>response | eIF2B <sup>M</sup> ,<br>remyelination<br>response |
|----------|---------|-------------------------------------------------|-------------------------------|------------------------------------------------------------------|---------------------------------------------------|
| Myo6     | 10      | 1.39                                            | 0.75                          | 1.32                                                             | 0.73                                              |
| Necap1   | 10      | 1.11                                            | 0.79                          | 1.03                                                             | 0.79                                              |
| Pclo     | 10      | 1.11                                            | 0.71                          | 0.95                                                             | 0.81                                              |
| Psemb2   | 10      | 0.99                                            | 0.80                          | 0.95                                                             | 0.75                                              |
| Tppp     | 10      | 1.26                                            | 0.83                          | 1.05                                                             | 0.90                                              |
| Ktn1     | 10      | 1.55                                            | 0.79                          | 1.31                                                             | 0.91                                              |
| Acat1    | 10      | 1.08                                            | 0.95                          | 1.08                                                             | 1.01                                              |
| Ap3b2    | 10      | 1.09                                            | 0.97                          | 1.05                                                             | 0.97                                              |
| Ddt      | 10      | 1.03                                            | 0.88                          | 1.16                                                             | 0.94                                              |
| Etfa     | 10      | 1.16                                            | 0.88                          | 1.13                                                             | 0.98                                              |
| Fis1     | 10      | 1.22                                            | 0.95                          | 1.18                                                             | 0.98                                              |
| Vcl      | 10      | 1.18                                            | 0.99                          | 1.19                                                             | 0.93                                              |
| Vps26b   | 10      | 1.20                                            | 0.92                          | 1.18                                                             | 0.99                                              |
| Dbnl     | 10      | 1.21                                            | 0.79                          | 1.83                                                             | 0.80                                              |
| Acot7    | 10      | 1.07                                            | 0.74                          | 0.98                                                             | 0.89                                              |
| Atp6v1g1 | 10      | 1.05                                            | 0.78                          | 1.07                                                             | 0.87                                              |
| C21Orf33 | 10      | 1.05                                            | 0.87                          | 1.04                                                             | 0.91                                              |
| Cotl1    | 10      | 1.00                                            | 0.94                          | 1.01                                                             | 0.97                                              |
| Eef1a2   | 10      | 0.98                                            | 0.86                          | 1.06                                                             | 0.83                                              |
| Gbas     | 10      | 1.10                                            | 0.86                          | 1.04                                                             | 0.89                                              |
| Got2     | 10      | 1.00                                            | 0.95                          | 1.02                                                             | 0.99                                              |
| Psat1    | 10      | 0.94                                            | 0.76                          | 0.94                                                             | 0.86                                              |
| Rps10    | 10      | 1.02                                            | 0.87                          | 1.00                                                             | 0.91                                              |
| Sdhb     | 10      | 1.04                                            | 0.85                          | 0.99                                                             | 0.91                                              |
| Uchl1    | 10      | 1.04                                            | 0.88                          | 1.03                                                             | 0.92                                              |
| H2afj    | 11      | 1.12                                            | 0.44                          | 0.69                                                             | 1.92                                              |
| Cldn11   | 11      | 1.19                                            | 0.44                          | 0.92                                                             | 1.49                                              |
| Kif5b    | 11      | 1.04                                            | 0.51                          | 0.79                                                             | 1.13                                              |
| Rtn4     | 11      | 1.00                                            | 0.57                          | 0.67                                                             | 1.08                                              |
| Nars     | 11      | 1.05                                            | 0.74                          | 0.92                                                             | 1.50                                              |
| Akap7    | 11      | 0.94                                            | 0.70                          | 0.88                                                             | 1.30                                              |
| Slc25a4  | 11      | 0.96                                            | 0.78                          | 0.95                                                             | 1.09                                              |
| Nipsnap1 | 11      | 0.99                                            | 0.94                          | 0.96                                                             | 1.04                                              |
| Pgk1     | 11      | 0.98                                            | 0.91                          | 0.97                                                             | 1.04                                              |
| Ppfia3   | 11      | 1.00                                            | 0.90                          | 0.94                                                             | 1.04                                              |
| Rab5a    | 11      | 1.03                                            | 0.91                          | 0.93                                                             | 1.04                                              |
| Arl8b    | 11      | 1.13                                            | 0.99                          | 1.06                                                             | 1.23                                              |
| Asrgl1   | 11      | 1.16                                            | 0.95                          | 1.01                                                             | 1.36                                              |
| Atp5c1   | 11      | 1.01                                            | 0.85                          | 0.92                                                             | 1.12                                              |
| Atp5l    | 11      | 1.02                                            | 0.95                          | 0.95                                                             | 1.07                                              |
| Atp6v1f  | 11      | 1.08                                            | 0.89                          | 0.93                                                             | 1.14                                              |
| Cct3     | 11      | 1.11                                            | 0.95                          | 0.98                                                             | 1.24                                              |
| Cs       | 11      | 1.02                                            | 0.86                          | 0.99                                                             | 1.13                                              |
| Dynlrb1  | 11      | 1.00                                            | 0.91                          | 1.02                                                             | 1.12                                              |
| Fh       | 11      | 0.99                                            | 0.89                          | 0.99                                                             | 1.09                                              |
| Gnaq     | 11      | 1.00                                            | 0.89                          | 0.99                                                             | 1.08                                              |

Supp. Table 2 (cont.)

| Symbol  | Cluster | WT,<br>developmental<br>myelination<br>response | WT, remyelination<br>response | eIF2B <sup>M</sup> ,<br>developmental<br>myelination<br>response | eIF2B <sup>M</sup> ,<br>remyelination<br>response |
|---------|---------|-------------------------------------------------|-------------------------------|------------------------------------------------------------------|---------------------------------------------------|
| Hibch   | 11      | 1.01                                            | 0.82                          | 1.08                                                             | 1.26                                              |
| Ldhb    | 11      | 1.03                                            | 0.92                          | 0.96                                                             | 1.09                                              |
| Rps9    | 11      | 1.05                                            | 0.91                          | 1.07                                                             | 1.28                                              |
| Tufm    | 11      | 1.03                                            | 0.77                          | 0.97                                                             | 1.17                                              |
| Usp9x   | 11      | 0.98                                            | 0.85                          | 0.91                                                             | 1.15                                              |
| Xpnpep1 | 11      | 0.96                                            | 0.86                          | 0.98                                                             | 1.12                                              |
| Apoa1bp | 11      | 1.14                                            | 0.86                          | 1.11                                                             | 1.32                                              |
| Hnrnpa3 | 11      | 1.14                                            | 0.95                          | 1.09                                                             | 1.41                                              |
| Pygm    | 11      | 1.21                                            | 0.68                          | 1.01                                                             | 1.33                                              |
| Cct7    | 11      | 1.14                                            | 0.82                          | 0.88                                                             | 1.26                                              |
| Clasp2  | 11      | 0.94                                            | 0.79                          | 0.82                                                             | 1.09                                              |
| Gltp    | 11      | 1.21                                            | 0.76                          | 0.79                                                             | 1.46                                              |
| Immt    | 11      | 0.96                                            | 0.79                          | 0.86                                                             | 1.06                                              |
| Napa    | 11      | 1.03                                            | 0.85                          | 0.89                                                             | 1.07                                              |
| Ndufs8  | 11      | 0.96                                            | 0.76                          | 0.82                                                             | 1.08                                              |
| Ndufv3  | 11      | 0.83                                            | 0.74                          | 0.84                                                             | 0.92                                              |
| Rab24   | 11      | 1.01                                            | 0.46                          | 0.56                                                             | 0.91                                              |
| Ube2o   | 11      | 1.06                                            | 0.60                          | 0.70                                                             | 0.98                                              |
| Ckap5   | 11      | 1.63                                            | 0.56                          | 0.58                                                             | 1.06                                              |
| Nefh    | 11      | 1.76                                            | 0.43                          | 0.50                                                             | 0.89                                              |
| Map1b   | 11      | 4.15                                            | 0.25                          | 0.35                                                             | 1.44                                              |
| Gpr158  | 11      | 1.07                                            | 0.65                          | 0.75                                                             | 0.86                                              |
| Lrprrc  | 11      | 1.18                                            | 0.83                          | 0.91                                                             | 1.00                                              |
| Rps17   | 11      | 1.21                                            | 0.93                          | 0.89                                                             | 1.08                                              |
| Aifm1   | 11      | 1.37                                            | 0.69                          | 0.89                                                             | 1.18                                              |
| Sept8   | 11      | 1.51                                            | 0.92                          | 0.85                                                             | 1.24                                              |
| Lta4h   | 11      | 1.49                                            | 0.86                          | 0.96                                                             | 1.13                                              |
| Dctn2   | 11      | 0.96                                            | 0.88                          | 0.88                                                             | 0.95                                              |
| Hras    | 11      | 1.05                                            | 0.95                          | 0.96                                                             | 1.04                                              |
| Acly    | 11      | 1.06                                            | 0.93                          | 0.95                                                             | 1.07                                              |
| Cct6a   | 11      | 1.21                                            | 0.94                          | 0.93                                                             | 1.23                                              |
| Etfb    | 11      | 1.13                                            | 0.90                          | 0.96                                                             | 1.03                                              |
| Hspa12a | 11      | 1.21                                            | 0.97                          | 0.96                                                             | 1.14                                              |
| Kif5c   | 11      | 1.17                                            | 0.98                          | 0.97                                                             | 1.08                                              |
| Ndufa4  | 11      | 1.11                                            | 0.96                          | 0.94                                                             | 1.09                                              |
| Cops4   | 11      | 1.24                                            | 0.79                          | 0.77                                                             | 1.08                                              |
| Ctnnb1  | 11      | 1.23                                            | 0.86                          | 0.85                                                             | 1.16                                              |
| Sirt2   | 11      | 1.11                                            | 0.72                          | 0.83                                                             | 1.02                                              |
| Slc17a7 | 11      | 1.10                                            | 0.75                          | 0.88                                                             | 0.95                                              |
| Tpp2    | 11      | 1.10                                            | 0.88                          | 0.92                                                             | 1.06                                              |
| Rpl21   | 11      | 1.10                                            | 1.06                          | 0.81                                                             | 1.53                                              |
| Rala    | 11      | 0.90                                            | 0.88                          | 0.86                                                             | 0.90                                              |
| Sept3   | 11      | 1.13                                            | 1.04                          | 0.99                                                             | 1.17                                              |
| Abr     | 11      | 1.19                                            | 1.00                          | 0.89                                                             | 1.39                                              |
| Pura    | 11      | 1.08                                            | 1.01                          | 0.81                                                             | 1.30                                              |
| Rpl11   | 11      | 1.05                                            | 0.98                          | 0.90                                                             | 1.19                                              |

Supp. Table 2 (cont.)

| Symbol   | Cluster | WT,<br>developmental<br>myelination<br>response | WT, remyelination<br>response | eIF2B <sup>M</sup> ,<br>developmental<br>myelination<br>response | eIF2B <sup>M</sup> ,<br>remyelination<br>response |
|----------|---------|-------------------------------------------------|-------------------------------|------------------------------------------------------------------|---------------------------------------------------|
| Rps24    | 11      | 1.16                                            | 1.08                          | 1.05                                                             | 1.16                                              |
| Wdr7     | 11      | 1.11                                            | 0.91                          | 0.89                                                             | 1.21                                              |
| Xpo1     | 11      | 1.17                                            | 1.08                          | 0.94                                                             | 1.25                                              |
| Add1     | 11      | 1.00                                            | 0.98                          | 0.92                                                             | 1.08                                              |
| Cstb     | 11      | 1.18                                            | 1.12                          | 0.99                                                             | 1.19                                              |
| Dynll1   | 11      | 1.04                                            | 1.12                          | 0.79                                                             | 1.15                                              |
| Idh1     | 11      | 1.23                                            | 1.03                          | 0.86                                                             | 1.13                                              |
| Ncdn     | 11      | 1.14                                            | 1.07                          | 0.95                                                             | 1.14                                              |
| Nf1      | 11      | 1.06                                            | 1.06                          | 0.85                                                             | 1.16                                              |
| Rab6b    | 11      | 1.09                                            | 1.08                          | 0.97                                                             | 1.10                                              |
| Rps26    | 11      | 1.08                                            | 1.09                          | 0.93                                                             | 1.16                                              |
| Tceb1    | 11      | 1.12                                            | 1.06                          | 0.95                                                             | 1.09                                              |
| Actr2    | 11      | 1.01                                            | 0.90                          | 0.66                                                             | 1.18                                              |
| Actr3    | 11      | 1.10                                            | 0.89                          | 0.73                                                             | 1.15                                              |
| Afg3l2   | 11      | 1.09                                            | 0.96                          | 0.86                                                             | 1.03                                              |
| Arf6     | 11      | 1.03                                            | 0.86                          | 0.82                                                             | 1.12                                              |
| C19Orf70 | 11      | 1.18                                            | 0.95                          | 0.77                                                             | 1.18                                              |
| Csnk2a2  | 11      | 1.09                                            | 0.95                          | 0.83                                                             | 1.08                                              |
| Ddx3x    | 11      | 1.08                                            | 0.86                          | 0.76                                                             | 1.00                                              |
| Dusp3    | 11      | 1.03                                            | 0.87                          | 0.70                                                             | 1.11                                              |
| Dync1li2 | 11      | 1.39                                            | 0.96                          | 0.64                                                             | 1.16                                              |
| Eprs     | 11      | 1.14                                            | 0.81                          | 0.68                                                             | 1.05                                              |
| Fam49b   | 11      | 1.11                                            | 0.89                          | 0.74                                                             | 1.00                                              |
| Rap2a    | 11      | 1.07                                            | 0.87                          | 0.83                                                             | 1.12                                              |
| Rnpep    | 11      | 1.17                                            | 0.97                          | 0.81                                                             | 1.14                                              |
| Rps4x    | 11      | 1.11                                            | 0.91                          | 0.82                                                             | 1.11                                              |
| Srcin1   | 11      | 1.18                                            | 0.92                          | 0.70                                                             | 1.04                                              |
| Ppp3ca   | 11      | 0.96                                            | 0.76                          | 0.62                                                             | 1.11                                              |
| Atp1a1   | 12      | 0.64                                            | 1.32                          | 1.10                                                             | 1.44                                              |
| Atp6v0a1 | 12      | 0.64                                            | 0.95                          | 0.97                                                             | 1.23                                              |
| Atp6v0c  | 12      | 0.68                                            | 1.00                          | 1.09                                                             | 1.41                                              |
| Cox6c    | 12      | 0.65                                            | 1.00                          | 0.97                                                             | 1.00                                              |
| Eif1     | 12      | 0.30                                            | 0.83                          | 0.99                                                             | 1.78                                              |
| Nd1      | 12      | 0.45                                            | 1.03                          | 0.99                                                             | 1.30                                              |
| Nd4      | 12      | 0.71                                            | 1.02                          | 1.10                                                             | 1.32                                              |
| Ndufa12  | 12      | 0.71                                            | 0.94                          | 0.96                                                             | 1.37                                              |
| Ndufa2   | 12      | 0.66                                            | 0.94                          | 0.97                                                             | 1.32                                              |
| Ndufa8   | 12      | 0.67                                            | 0.88                          | 1.02                                                             | 1.42                                              |
| Ndufb6   | 12      | 0.62                                            | 0.91                          | 0.92                                                             | 1.32                                              |
| Ndufs3   | 12      | 0.65                                            | 0.88                          | 0.96                                                             | 1.20                                              |
| Phb2     | 12      | 0.68                                            | 0.88                          | 1.03                                                             | 1.27                                              |
| Slc1a2   | 12      | 0.61                                            | 1.09                          | 1.11                                                             | 1.31                                              |
| Thy1     | 12      | 0.68                                            | 1.10                          | 0.97                                                             | 1.15                                              |
| Lasp1    | 12      | 0.18                                            | 0.57                          | 0.56                                                             | 1.89                                              |
| Rph3a    | 12      | 0.24                                            | 0.30                          | 0.29                                                             | 0.32                                              |
| Atp1a3   | 12      | 0.78                                            | 0.98                          | 1.15                                                             | 1.29                                              |

Supp. Table 2 (cont.)

| Symbol  | Cluster | WT,<br>developmental<br>myelination<br>response | WT, remyelination<br>response | eIF2B <sup>M</sup> ,<br>developmental<br>myelination<br>response | eIF2B <sup>M</sup> ,<br>remyelination<br>response |
|---------|---------|-------------------------------------------------|-------------------------------|------------------------------------------------------------------|---------------------------------------------------|
| Atp1b1  | 12      | 0.82                                            | 1.00                          | 1.09                                                             | 1.14                                              |
| Cltc    | 12      | 0.88                                            | 1.00                          | 1.03                                                             | 1.14                                              |
| Cox5a   | 12      | 0.76                                            | 0.90                          | 0.94                                                             | 0.99                                              |
| Cse1l   | 12      | 0.80                                            | 1.00                          | 1.07                                                             | 1.10                                              |
| Fth1    | 12      | 0.84                                            | 0.96                          | 1.10                                                             | 1.05                                              |
| Mag     | 12      | 0.85                                            | 0.99                          | 1.01                                                             | 1.15                                              |
| Ndufa10 | 12      | 0.76                                            | 1.00                          | 0.92                                                             | 1.22                                              |
| Ndufb3  | 12      | 0.74                                            | 0.88                          | 0.97                                                             | 1.12                                              |
| Ndufs6  | 12      | 0.79                                            | 0.92                          | 0.90                                                             | 1.15                                              |
| Qdpr    | 12      | 0.77                                            | 0.93                          | 1.08                                                             | 1.08                                              |
| Rpl17   | 12      | 0.72                                            | 0.92                          | 1.19                                                             | 1.36                                              |
| Slc12a5 | 12      | 0.76                                            | 1.01                          | 0.98                                                             | 1.09                                              |
| Tmed10  | 12      | 0.80                                            | 0.94                          | 1.14                                                             | 1.01                                              |
| Vdac1   | 12      | 0.75                                            | 0.92                          | 1.04                                                             | 1.06                                              |
| Arpc1a  | 12      | 0.93                                            | 1.18                          | 1.10                                                             | 1.33                                              |
| Lrp1    | 12      | 0.84                                            | 1.10                          | 1.00                                                             | 1.12                                              |
| Lxn     | 12      | 0.85                                            | 1.21                          | 1.06                                                             | 1.46                                              |
| Ogdh    | 12      | 0.90                                            | 1.06                          | 1.12                                                             | 1.10                                              |
| Ppib    | 12      | 0.87                                            | 1.05                          | 1.09                                                             | 1.12                                              |
| Prkacb  | 12      | 0.90                                            | 1.18                          | 1.18                                                             | 1.19                                              |
| Rps2    | 12      | 0.98                                            | 1.10                          | 1.10                                                             | 1.16                                              |
| Rps8    | 12      | 0.94                                            | 1.20                          | 1.26                                                             | 1.38                                              |
| Dctn1   | 12      | 0.98                                            | 1.20                          | 1.50                                                             | 1.42                                              |
| Cyc1    | 12      | 0.89                                            | 0.95                          | 1.00                                                             | 0.96                                              |
| Gsta4   | 12      | 0.91                                            | 0.99                          | 1.06                                                             | 1.03                                              |
| Hk1     | 12      | 0.83                                            | 0.93                          | 1.01                                                             | 0.94                                              |
| Prdx2   | 12      | 0.91                                            | 1.03                          | 1.05                                                             | 1.03                                              |
| Rps13   | 12      | 0.79                                            | 0.95                          | 1.01                                                             | 0.98                                              |
| Uqcrc2  | 12      | 0.84                                            | 0.93                          | 0.99                                                             | 0.98                                              |
| Vsnl1   | 12      | 0.87                                            | 0.96                          | 0.94                                                             | 0.97                                              |
| Stx12   | 12      | 0.74                                            | 0.90                          | 0.85                                                             | 0.89                                              |
| Gnb1    | 12      | 0.96                                            | 1.05                          | 1.10                                                             | 1.17                                              |
| Mtch2   | 12      | 0.92                                            | 1.03                          | 1.08                                                             | 1.14                                              |
| Prdx1   | 12      | 0.98                                            | 1.03                          | 1.08                                                             | 1.14                                              |
| Ca2     | 12      | 0.86                                            | 1.03                          | 0.95                                                             | 1.05                                              |
| Cct2    | 12      | 0.99                                            | 1.03                          | 1.01                                                             | 1.05                                              |
| Opa1    | 12      | 0.95                                            | 1.02                          | 1.00                                                             | 1.08                                              |
| Usp5    | 12      | 0.97                                            | 1.02                          | 1.02                                                             | 1.03                                              |
| Ina     | 13      | 0.75                                            | 1.04                          | 0.83                                                             | 1.64                                              |
| Itpr1   | 13      | 0.96                                            | 1.08                          | 0.85                                                             | 1.58                                              |
| Mgst3   | 13      | 0.84                                            | 1.36                          | 0.99                                                             | 1.84                                              |
| Vcan    | 13      | 0.91                                            | 1.19                          | 0.84                                                             | 1.60                                              |
| Slc4a10 | 13      | 0.85                                            | 0.91                          | 0.85                                                             | 1.11                                              |
| Gfap    | 13      | 0.72                                            | 1.69                          | 0.93                                                             | 1.61                                              |
| Arf5    | 13      | 0.96                                            | 1.14                          | 0.99                                                             | 1.21                                              |
| Atp2a2  | 13      | 0.84                                            | 1.30                          | 0.97                                                             | 1.41                                              |

Supp. Table 2 (cont.)

| Symbol   | Cluster | WT,<br>developmental<br>myelination<br>response | WT, remyelination<br>response | eIF2B <sup>M</sup> ,<br>developmental<br>myelination<br>response | eIF2B <sup>M</sup> ,<br>remyelination<br>response |
|----------|---------|-------------------------------------------------|-------------------------------|------------------------------------------------------------------|---------------------------------------------------|
| Grm3     | 13      | 0.84                                            | 1.20                          | 0.91                                                             | 1.37                                              |
| Prkcg    | 13      | 0.78                                            | 1.18                          | 0.82                                                             | 1.39                                              |
| Sfxn3    | 13      | 0.82                                            | 1.19                          | 0.96                                                             | 1.15                                              |
| Slc25a22 | 13      | 0.92                                            | 1.13                          | 0.93                                                             | 1.21                                              |
| Crk      | 13      | 1.15                                            | 1.36                          | 1.26                                                             | 1.46                                              |
| Atp6v1c1 | 13      | 0.95                                            | 0.98                          | 0.93                                                             | 1.01                                              |
| Cox4i1   | 13      | 0.92                                            | 0.95                          | 0.92                                                             | 0.98                                              |
| Dynll2   | 13      | 0.96                                            | 0.97                          | 0.96                                                             | 0.97                                              |
| Pdia3    | 13      | 0.92                                            | 0.97                          | 0.94                                                             | 1.06                                              |
| Aldoa    | 13      | 0.98                                            | 1.08                          | 1.01                                                             | 1.21                                              |
| Cap2     | 13      | 1.03                                            | 1.06                          | 0.91                                                             | 1.23                                              |
| Kiaa1468 | 13      | 0.95                                            | 1.01                          | 0.84                                                             | 1.32                                              |
| Ndufa6   | 13      | 0.91                                            | 1.02                          | 0.95                                                             | 1.13                                              |
| Paics    | 13      | 1.14                                            | 1.20                          | 0.99                                                             | 1.31                                              |
| Atp2b2   | 13      | 0.98                                            | 1.04                          | 0.93                                                             | 1.11                                              |
| Crmp1    | 13      | 0.98                                            | 1.00                          | 0.94                                                             | 1.09                                              |
| Dhx9     | 13      | 0.95                                            | 1.12                          | 0.92                                                             | 1.14                                              |
| Dmxl2    | 13      | 1.07                                            | 1.14                          | 0.93                                                             | 1.24                                              |
| Gng3     | 13      | 1.01                                            | 1.08                          | 0.92                                                             | 1.11                                              |
| Ldha     | 13      | 0.97                                            | 1.10                          | 0.92                                                             | 1.13                                              |
| Lsamp    | 13      | 0.89                                            | 1.04                          | 0.94                                                             | 1.06                                              |
| Nbea     | 13      | 1.03                                            | 1.17                          | 0.91                                                             | 1.20                                              |
| Nsf      | 13      | 0.98                                            | 1.01                          | 0.95                                                             | 1.02                                              |
| Rps18    | 13      | 0.95                                            | 1.18                          | 0.85                                                             | 1.18                                              |
| Rps3     | 13      | 1.00                                            | 1.09                          | 0.95                                                             | 1.10                                              |
| Stxbp1   | 13      | 0.98                                            | 1.08                          | 1.02                                                             | 1.11                                              |
| Tpt1     | 13      | 0.95                                            | 1.01                          | 0.91                                                             | 1.07                                              |
| Tubb3    | 13      | 0.99                                            | 1.03                          | 1.01                                                             | 1.07                                              |
| Tubb4a   | 13      | 1.03                                            | 1.09                          | 0.90                                                             | 1.16                                              |
| Ywhah    | 13      | 0.92                                            | 1.02                          | 0.97                                                             | 1.08                                              |
| Tf       | 13      | 0.79                                            | 0.81                          | 0.59                                                             | 1.20                                              |
| Ak3      | 14      | 1.00                                            | 0.79                          | 0.87                                                             | 1.45                                              |
| Cnp      | 14      | 1.01                                            | 0.80                          | 0.91                                                             | 1.51                                              |
| Mbp      | 14      | 1.03                                            | 0.76                          | 0.94                                                             | 1.65                                              |
| Mog      | 14      | 0.90                                            | 0.73                          | 1.01                                                             | 1.80                                              |
| Nefl     | 14      | 0.97                                            | 0.94                          | 0.77                                                             | 1.85                                              |
| Nefm     | 14      | 1.03                                            | 0.98                          | 0.78                                                             | 1.68                                              |
| Picalm   | 14      | 0.93                                            | 0.88                          | 0.89                                                             | 1.95                                              |
| Prkcb    | 14      | 0.87                                            | 0.87                          | 0.82                                                             | 1.70                                              |
| Cryab    | 14      | 1.09                                            | 0.81                          | 1.12                                                             | 3.79                                              |
| Napg     | 14      | 1.03                                            | 0.92                          | 0.96                                                             | 1.72                                              |
| Rab3gap1 | 14      | 1.05                                            | 0.79                          | 0.79                                                             | 2.31                                              |
| March2   | 14      | 0.89                                            | 0.86                          | 0.93                                                             | 1.26                                              |
| Dlg1     | 14      | 0.89                                            | 0.75                          | 0.87                                                             | 1.21                                              |
| Ndufb4   | 14      | 0.92                                            | 0.91                          | 0.91                                                             | 1.28                                              |
| Ndufc2   | 14      | 0.82                                            | 0.77                          | 0.80                                                             | 1.12                                              |

Supp. Table 2 (cont.)

| Symbol    | Cluster | WT,<br>developmental<br>myelination<br>response | WT, remyelination<br>response | eIF2B <sup>M</sup> ,<br>developmental<br>myelination<br>response | eIF2B <sup>M</sup> ,<br>remyelination<br>response |
|-----------|---------|-------------------------------------------------|-------------------------------|------------------------------------------------------------------|---------------------------------------------------|
| Ndufs5    | 14      | 0.91                                            | 0.90                          | 0.94                                                             | 1.12                                              |
| Rapgef2   | 14      | 0.74                                            | 0.86                          | 0.80                                                             | 1.40                                              |
| Slc25a11  | 14      | 0.90                                            | 0.87                          | 0.93                                                             | 1.19                                              |
| Atp6v1e1  | 14      | 0.93                                            | 0.90                          | 0.92                                                             | 0.99                                              |
| Eif4a2    | 14      | 0.96                                            | 0.92                          | 0.92                                                             | 1.02                                              |
| Vps35     | 14      | 0.97                                            | 0.94                          | 0.93                                                             | 1.03                                              |
| Aars      | 14      | 1.06                                            | 1.05                          | 1.01                                                             | 1.18                                              |
| Arpc3     | 14      | 1.01                                            | 0.98                          | 0.93                                                             | 1.18                                              |
| Atp5f1    | 14      | 0.97                                            | 0.92                          | 0.92                                                             | 1.10                                              |
| Cdh2      | 14      | 1.06                                            | 1.08                          | 1.06                                                             | 1.14                                              |
| Cfl1      | 14      | 1.01                                            | 0.98                          | 0.95                                                             | 1.13                                              |
| Dpysl4    | 14      | 1.03                                            | 0.95                          | 0.94                                                             | 1.17                                              |
| Gapdh/Loc | 14      | 1.01                                            | 0.96                          | 1.02                                                             | 1.39                                              |
| Gstm3     | 14      | 0.98                                            | 0.94                          | 0.99                                                             | 1.10                                              |
| Gstp1     | 14      | 1.00                                            | 0.97                          | 1.01                                                             | 1.12                                              |
| Hnrnpc    | 14      | 1.05                                            | 1.03                          | 1.07                                                             | 1.23                                              |
| Kcnab2    | 14      | 1.03                                            | 0.98                          | 1.01                                                             | 1.24                                              |
| Myh9      | 14      | 1.01                                            | 0.86                          | 0.94                                                             | 1.30                                              |
| Ndufa13   | 14      | 0.97                                            | 0.90                          | 0.89                                                             | 1.32                                              |
| Ogt       | 14      | 1.04                                            | 0.98                          | 0.91                                                             | 1.23                                              |
| Pdcd6     | 14      | 0.93                                            | 0.97                          | 0.95                                                             | 1.24                                              |
| Rpl18     | 14      | 1.00                                            | 0.94                          | 1.01                                                             | 1.37                                              |
| Rpl7      | 14      | 1.01                                            | 1.02                          | 0.87                                                             | 1.35                                              |
| Rps7      | 14      | 1.00                                            | 0.95                          | 1.01                                                             | 1.30                                              |
| Sfxn5     | 14      | 1.07                                            | 0.86                          | 0.94                                                             | 1.39                                              |
| Sv2a      | 14      | 1.04                                            | 0.94                          | 0.97                                                             | 1.17                                              |
| Arf3      | 14      | 1.02                                            | 1.03                          | 0.97                                                             | 1.11                                              |
| Tubb2a    | 14      | 1.03                                            | 1.03                          | 1.02                                                             | 1.06                                              |
| Ndufa7    | 14      | 0.94                                            | 0.82                          | 0.79                                                             | 1.12                                              |
| Pip5k1c   | 14      | 0.93                                            | 0.81                          | 0.78                                                             | 1.20                                              |
| Idh3a     | 14      | 0.65                                            | 0.89                          | 1.04                                                             | 2.27                                              |
| Gucy1b3   | 14      | 1.18                                            | 1.05                          | 1.40                                                             | 1.74                                              |
| Plp1      | 14      | 0.88                                            | 0.96                          | 1.04                                                             | 1.92                                              |
| Brp44     | 14      | 0.89                                            | 0.81                          | 1.00                                                             | 1.28                                              |
| Cct5      | 14      | 0.89                                            | 0.93                          | 1.03                                                             | 1.26                                              |
| Cox2      | 14      | 0.81                                            | 0.86                          | 1.02                                                             | 1.36                                              |
| Cox5b     | 14      | 0.80                                            | 0.77                          | 0.93                                                             | 1.33                                              |
| Fasn      | 14      | 0.92                                            | 0.92                          | 1.04                                                             | 1.39                                              |
| Myo18a    | 14      | 0.83                                            | 0.87                          | 0.94                                                             | 1.22                                              |
| Ndufa9    | 14      | 0.80                                            | 0.91                          | 1.03                                                             | 1.28                                              |
| Ndufb5    | 14      | 0.76                                            | 0.82                          | 1.02                                                             | 1.29                                              |
| Ndufs1    | 14      | 0.74                                            | 0.85                          | 0.97                                                             | 1.17                                              |
| Ndufs2    | 14      | 0.88                                            | 0.81                          | 0.97                                                             | 1.12                                              |
| Phb       | 14      | 0.72                                            | 0.84                          | 1.07                                                             | 1.24                                              |
| Pvalb     | 14      | 0.84                                            | 0.89                          | 0.97                                                             | 1.23                                              |
| Scn9a     | 14      | 0.73                                            | 0.81                          | 0.95                                                             | 1.33                                              |

Supp. Table 2 (cont.)

| Symbol   | Cluster | WT,<br>developmental<br>myelination<br>response | WT, remyelination<br>response | eIF2B <sup>M</sup> ,<br>developmental<br>myelination<br>response | eIF2B <sup>M</sup> ,<br>remyelination<br>response |
|----------|---------|-------------------------------------------------|-------------------------------|------------------------------------------------------------------|---------------------------------------------------|
| Slc25a12 | 14      | 0.91                                            | 0.93                          | 1.03                                                             | 1.28                                              |
| Slc6a1   | 14      | 0.78                                            | 0.78                          | 1.02                                                             | 1.15                                              |
| Uqcrc1   | 14      | 0.85                                            | 0.88                          | 0.95                                                             | 1.10                                              |
| Uqcrcq   | 14      | 0.96                                            | 0.84                          | 1.06                                                             | 1.34                                              |
| Vdac2    | 14      | 0.85                                            | 0.94                          | 1.09                                                             | 1.22                                              |
| Ndufb10  | 14      | 0.73                                            | 0.80                          | 0.81                                                             | 1.00                                              |
| Ak1      | 14      | 0.96                                            | 0.94                          | 1.03                                                             | 1.10                                              |
| Atp5J2   | 14      | 0.98                                            | 0.93                          | 1.10                                                             | 1.32                                              |
| Atp5o    | 14      | 0.95                                            | 0.93                          | 0.99                                                             | 1.15                                              |
| Atp6v0d1 | 14      | 0.92                                            | 1.04                          | 1.01                                                             | 1.29                                              |
| Cmpk1    | 14      | 1.06                                            | 1.01                          | 1.11                                                             | 1.26                                              |
| Hadha    | 14      | 1.02                                            | 0.99                          | 1.05                                                             | 1.08                                              |
| Iars2    | 14      | 1.00                                            | 1.06                          | 1.15                                                             | 1.36                                              |
| Myh10    | 14      | 0.98                                            | 0.94                          | 1.06                                                             | 1.19                                              |
| Ndufs7   | 14      | 0.99                                            | 0.91                          | 1.06                                                             | 1.27                                              |
| Otub1    | 14      | 1.00                                            | 1.04                          | 1.04                                                             | 1.17                                              |
| Prkaca   | 14      | 0.96                                            | 1.01                          | 1.03                                                             | 1.19                                              |
| Pygb     | 14      | 1.05                                            | 1.02                          | 1.06                                                             | 1.13                                              |
| Rab5b    | 14      | 0.94                                            | 0.96                          | 1.04                                                             | 1.12                                              |
| Ufc1     | 14      | 0.93                                            | 0.94                          | 1.17                                                             | 1.44                                              |



**Supp. Table 3**

| Eif2b5 <sup>M</sup> , w11                          |          | WT, w11                                            |          | Eif2b5 <sup>M</sup> , w12                          |          | WT, w12                                  |          |
|----------------------------------------------------|----------|----------------------------------------------------|----------|----------------------------------------------------|----------|------------------------------------------|----------|
| Movement Disorders                                 | 1.97E-63 | Movement Disorders                                 | 9.41E-69 | Movement Disorders                                 | 1.09E-70 | Movement Disorders                       | 6.42E-65 |
| disorder of basal ganglia                          | 2.09E-59 | disorder of basal ganglia                          | 2.95E-67 | disorder of basal ganglia                          | 5.79E-66 | disorder of basal ganglia                | 1.40E-58 |
| neuromuscular disease                              | 1.98E-51 | neuromuscular disease                              | 7.43E-60 | neuromuscular disease                              | 1.91E-57 | neuromuscular disease                    | 5.05E-50 |
| neurological signs                                 | 7.54E-46 | Huntington's Disease                               | 1.84E-52 | Huntington's Disease                               | 7.84E-52 | neurological signs                       | 2.18E-43 |
| Huntington's Disease                               | 2.83E-45 | neurological signs                                 | 1.31E-51 | neurological signs                                 | 1.01E-49 | Huntington's Disease                     | 4.02E-42 |
| dyskinesia                                         | 1.17E-43 | dyskinesia                                         | 1.24E-49 | organization of cytoplasm                          | 2.21E-49 | dyskinesia                               | 6.20E-41 |
| organization of cytoplasm                          | 2.36E-42 | organization of cytoplasm                          | 6.28E-44 | dyskinesia                                         | 4.91E-49 | organization of cytoplasm                | 2.95E-40 |
| organization of cytoskeleton                       | 6.42E-40 | organization of cytoskeleton                       | 1.31E-42 | organization of cytoskeleton                       | 1.26E-47 | organization of cytoskeleton             | 4.26E-40 |
| microtubule dynamics                               | 4.81E-39 | microtubule dynamics                               | 6.88E-41 | microtubule dynamics                               | 4.38E-46 | microtubule dynamics                     | 5.15E-38 |
| formation of cellular protrusions                  | 1.77E-34 | formation of cellular protrusions                  | 4.58E-33 | formation of cellular protrusions                  | 9.22E-37 | formation of cellular protrusions        | 2.01E-33 |
| development of neurons                             | 4.59E-32 | development of neurons                             | 6.38E-31 | development of neurons                             | 7.18E-36 | development of neurons                   | 1.57E-30 |
| formation of plasma membrane projections           | 2.53E-30 | neuritogenesis                                     | 3.96E-30 | neuritogenesis                                     | 2.12E-34 | formation of plasma membrane projections | 2.10E-29 |
| neuritogenesis                                     | 4.58E-30 | formation of plasma membrane projections           | 1.81E-29 | formation of plasma membrane projections           | 1.51E-33 | neuritogenesis                           | 2.62E-29 |
| necrosis                                           | 7.78E-27 | transport of molecule                              | 2.73E-29 | transport of molecule                              | 1.38E-28 | transport of molecule                    | 1.41E-28 |
| cell death                                         | 7.70E-26 | cell death                                         | 4.51E-28 | Schizophrenia                                      | 4.32E-28 | Viral Infection                          | 2.10E-24 |
| transport of molecule                              | 1.16E-25 | necrosis                                           | 4.87E-26 | cell death                                         | 1.05E-26 | morphogenesis of neurons                 | 1.34E-23 |
| transport of vesicles                              | 4.23E-25 | long-term potentiation                             | 5.52E-26 | neurotransmission                                  | 1.83E-25 | Schizophrenia                            | 3.37E-23 |
| metabolism of nucleic acid component or derivative | 4.49E-24 | Schizophrenia                                      | 2.41E-25 | long-term potentiation                             | 1.45E-24 | neurotransmission                        | 3.52E-23 |
| transport of synaptic vesicles                     | 1.54E-23 | secretory pathway                                  | 5.28E-25 | necrosis                                           | 5.05E-24 | long-term potentiation                   | 6.84E-23 |
| Schizophrenia                                      | 2.92E-23 | metabolism of nucleic acid component or derivative | 1.76E-24 | morphogenesis of neurons                           | 6.55E-24 | morphogenesis of neurites                | 8.17E-23 |
| morphogenesis of neurons                           | 3.10E-23 | transport of vesicles                              | 3.15E-24 | growth of neurites                                 | 1.76E-23 | shape change of neurons                  | 1.39E-22 |
| Viral Infection                                    | 1.05E-22 | exocytosis                                         | 3.37E-24 | behavior                                           | 1.79E-23 | branching of neurons                     | 1.47E-22 |
| morphogenesis of neurites                          | 1.59E-22 | neurotransmission                                  | 1.04E-23 | synaptic transmission                              | 1.88E-23 | synaptic transmission                    | 3.03E-22 |
| secretory pathway                                  | 1.74E-22 | endocytosis                                        | 4.13E-23 | secretory pathway                                  | 1.94E-23 | endocytosis                              | 3.45E-22 |
| exocytosis                                         | 2.09E-22 | Viral Infection                                    | 7.03E-23 | exocytosis                                         | 2.02E-23 | necrosis                                 | 5.67E-22 |
| long-term potentiation                             | 3.83E-22 | formation of filaments                             | 7.13E-23 | development of cytoplasm                           | 2.58E-23 | secretory pathway                        | 7.92E-22 |
| proliferation of cells                             | 5.70E-22 | tauopathy                                          | 1.01E-22 | morphogenesis of neurites                          | 2.95E-23 | cell death                               | 9.27E-22 |
| neurotransmission                                  | 8.30E-22 | development of cytoplasm                           | 3.43E-22 | Viral Infection                                    | 6.27E-23 | exocytosis                               | 1.11E-21 |
| behavior                                           | 2.88E-21 | synaptic transmission                              | 1.26E-21 | proliferation of cells                             | 9.68E-23 | dendritic growth/branching               | 3.46E-21 |
| metabolism of purine nucleotide                    | 3.92E-21 | Dementia                                           | 2.80E-21 | metabolism of nucleic acid component or derivative | 1.39E-22 | branching of neurites                    | 5.15E-21 |
| tauopathy                                          | 5.52E-21 | outgrowth of neurites                              | 3.14E-21 | outgrowth of neurites                              | 2.43E-22 | morphology of nervous tissue             | 9.86E-21 |
| endocytosis                                        | 6.55E-21 | proliferation of cells                             | 3.90E-21 | formation of filaments                             | 9.15E-22 | progressive motor neuropathy             | 1.50E-20 |
| synaptic transmission                              | 7.93E-21 | amyloidosis                                        | 4.12E-21 | outgrowth of cells                                 | 1.56E-21 | morphology of neurons                    | 1.65E-20 |
| metabolism of nucleotide                           | 2.16E-20 | transport of synaptic vesicles                     | 5.38E-21 | tauopathy                                          | 7.98E-21 | morphology of neurites                   | 3.37E-20 |
| neuronal cell death                                | 3.70E-20 | metabolism of nucleotide                           | 6.76E-21 | proliferation of neuronal cells                    | 1.31E-20 | tauopathy                                | 3.94E-20 |
| metabolism of nucleoside triphosphate              | 4.98E-20 | progressive motor neuropathy                       | 6.91E-21 | morphology of nervous tissue                       | 2.82E-20 | transport of synaptic vesicles           | 4.09E-20 |
| outgrowth of neurites                              | 5.89E-20 | neuronal cell death                                | 8.92E-21 | morphology of neurons                              | 3.20E-20 | synaptic depression                      | 5.60E-20 |

**Supp. Table 3 (cont.)**

| Eif2b5 <sup>M</sup> , w11          |          | WT, w11                                   |          | Eif2b5 <sup>M</sup> , w12             |          | WT, w12                                            |          |
|------------------------------------|----------|-------------------------------------------|----------|---------------------------------------|----------|----------------------------------------------------|----------|
| branching of neurons               | 1.06E-19 | behavior                                  | 1.20E-20 | endocytosis                           | 4.25E-20 | metabolism of nucleoside triphosphate              | 6.33E-20 |
| shape change of neurons            | 1.09E-19 | outgrowth of cells                        | 1.81E-20 | transport of synaptic vesicles        | 7.92E-20 | metabolism of nucleic acid component or derivative | 1.20E-19 |
| growth of neurites                 | 1.84E-19 | morphogenesis of neurons                  | 2.34E-20 | transport of protein                  | 9.62E-20 | outgrowth of neurites                              | 1.43E-19 |
| amyloidosis                        | 2.16E-19 | growth of neurites                        | 2.40E-20 | transport of vesicles                 | 1.30E-19 | development of cytoplasm                           | 1.44E-19 |
| morphology of nervous tissue       | 3.05E-19 | Alzheimer's disease                       | 2.69E-20 | formation of cytoskeleton             | 1.33E-19 | growth of neurites                                 | 1.85E-19 |
| formation of filaments             | 4.03E-19 | metabolism of purine nucleotide           | 8.92E-20 | metabolism of nucleotide              | 1.73E-19 | transport of vesicles                              | 1.96E-19 |
| morphology of neurons              | 4.22E-19 | metabolism of nucleoside triphosphate     | 9.05E-20 | cognition                             | 2.48E-19 | outgrowth of cells                                 | 3.36E-19 |
| Dementia                           | 5.01E-19 | morphogenesis of neurites                 | 1.00E-19 | branching of neurons                  | 2.61E-19 | neuronal cell death                                | 4.64E-19 |
| outgrowth of cells                 | 7.04E-19 | transport of protein                      | 1.00E-19 | amyloidosis                           | 2.82E-19 | Dementia                                           | 4.67E-19 |
| polymerization of protein          | 1.38E-18 | exocytosis by cells                       | 3.35E-19 | translation                           | 2.93E-19 | amyloidosis                                        | 5.27E-19 |
| branching of neurites              | 2.42E-18 | formation of cytoskeleton                 | 5.01E-19 | shape change of neurons               | 2.95E-19 | Parkinson's disease                                | 1.04E-18 |
| development of cytoplasm           | 2.55E-18 | hydrolysis of nucleotide                  | 7.06E-19 | apoptosis                             | 4.37E-19 | formation of filaments                             | 1.79E-18 |
| translation                        | 2.91E-18 | apoptosis                                 | 9.04E-19 | synaptic depression                   | 4.47E-19 | metabolism of purine nucleotide                    | 2.54E-18 |
| dendritic growth/branching         | 4.38E-18 | translation                               | 1.31E-18 | neuronal cell death                   | 4.47E-19 | exocytosis by cells                                | 4.96E-18 |
| exocytosis by cells                | 4.54E-18 | proliferation of neuronal cells           | 2.57E-18 | progressive motor neuropathy          | 5.55E-19 | morphology of cellular protrusions                 | 5.89E-18 |
| Alzheimer's disease                | 6.36E-18 | cell death of tumor cell lines            | 6.88E-18 | Dementia                              | 5.73E-19 | Alzheimer's disease                                | 8.68E-18 |
| progressive motor neuropathy       | 2.40E-17 | engulfment of cells                       | 7.47E-18 | exocytosis by cells                   | 2.47E-18 | organization of actin cytoskeleton                 | 1.00E-17 |
| morphology of neurites             | 2.69E-17 | Parkinson's disease                       | 8.13E-18 | learning                              | 2.50E-18 | behavior                                           | 1.39E-17 |
| proliferation of neuronal cells    | 3.82E-17 | morphology of nervous tissue              | 8.90E-18 | dendritic growth/branching            | 2.64E-18 | abnormal morphology of neurons                     | 1.77E-17 |
| cognition                          | 5.45E-17 | morphology of neurons                     | 1.07E-17 | branching of neurites                 | 4.39E-18 | proliferation of neuronal cells                    | 3.11E-17 |
| morphology of nervous system       | 8.21E-17 | branching of neurons                      | 1.90E-17 | shape change of neurites              | 4.93E-18 | branching of cells                                 | 3.52E-17 |
| organization of actin cytoskeleton | 1.97E-16 | synaptic depression                       | 2.17E-17 | Alzheimer's disease                   | 5.32E-18 | replication of Influenza A virus                   | 5.23E-17 |
| hydrolysis of nucleotide           | 2.39E-16 | cognition                                 | 2.74E-17 | polymerization of protein             | 5.84E-18 | translation                                        | 6.85E-17 |
| endocytosis of vesicles            | 2.61E-16 | learning                                  | 2.78E-17 | organization of actin cytoskeleton    | 7.17E-18 | metabolism of nucleotide                           | 7.84E-17 |
| learning                           | 2.63E-16 | synthesis of protein                      | 3.28E-17 | morphology of neurites                | 8.22E-18 | morphology of nervous system                       | 7.97E-17 |
| abnormal morphology of neurons     | 4.52E-16 | morphology of plasma membrane projections | 5.93E-17 | synthesis of protein                  | 1.01E-17 | formation of cytoskeleton                          | 8.90E-17 |
| transport of protein               | 6.13E-16 | dendritic growth/branching                | 6.49E-17 | metabolism of purine nucleotide       | 1.07E-17 | abnormal morphology of plasma membrane             | 8.98E-17 |
| organization of organelle          | 6.82E-16 | organismal death                          | 1.34E-16 | morphology of nervous system          | 1.22E-17 | transport of protein                               | 1.30E-16 |
| morphology of cellular protrusions | 8.14E-16 | morphology of neurites                    | 2.41E-16 | synaptic transmission of cells        | 1.82E-17 | proliferation of cells                             | 2.34E-16 |
| formation of cytoskeleton          | 1.30E-15 | branching of neurites                     | 3.07E-16 | replication of Influenza A virus      | 2.50E-17 | abnormal morphology of neurites                    | 2.40E-16 |
| synaptic depression                | 1.33E-15 | shape change of neurites                  | 3.28E-16 | metabolism of nucleoside triphosphate | 3.13E-17 | morphology of axons                                | 2.56E-16 |
| cell death of tumor cell lines     | 1.48E-15 | translation of protein                    | 4.89E-16 | abnormal morphology of neurons        | 4.28E-17 | sprouting                                          | 4.68E-16 |
| metabolism of ATP                  | 1.67E-15 | metabolism of protein                     | 7.63E-16 | polymerization of filaments           | 4.53E-17 | synthesis of protein                               | 5.22E-16 |
| synthesis of protein               | 1.76E-15 | organization of organelle                 | 1.17E-15 | translation of protein                | 1.18E-16 | endocytosis of vesicles                            | 5.90E-16 |

**Supp. Table 3 (cont.)**

| Eif2b5 <sup>M</sup> , w11              |          | WT, w11                                |          | Eif2b5 <sup>M</sup> , w12              |          | WT, w12                                |          |
|----------------------------------------|----------|----------------------------------------|----------|----------------------------------------|----------|----------------------------------------|----------|
| apoptosis                              | 2.00E-15 | synaptic transmission of cells         | 1.20E-15 | Parkinson's disease                    | 1.29E-16 | engulfment of cells                    | 1.15E-15 |
| metabolism of protein                  | 2.30E-15 | organization of actin cytoskeleton     | 1.61E-15 | metabolism of protein                  | 1.41E-16 | metabolism of protein                  | 2.63E-15 |
| exocytosis of vesicles                 | 2.91E-15 | endocytosis of vesicles                | 1.81E-15 | hydrolysis of nucleotide               | 1.85E-16 | metabolism of ATP                      | 3.80E-15 |
| synaptic transmission of cells         | 3.07E-15 | morphology of nervous system           | 2.11E-15 | cell death of tumor cell lines         | 1.91E-16 | myopathy                               | 3.86E-15 |
| translation of protein                 | 5.31E-15 | morphology of cellular protrusions     | 2.13E-15 | organismal death                       | 3.73E-16 | synaptic transmission of cells         | 4.52E-15 |
| quantity of cellular protrusions       | 5.52E-15 | polymerization of filaments            | 2.18E-15 | morphology of cellular protrusions     | 4.57E-16 | abnormal morphology of axons           | 4.73E-15 |
| organismal death                       | 7.37E-15 | metabolism of ATP                      | 2.36E-15 | abnormal morphology of plasma membrane | 8.79E-16 | replication of RNA virus               | 5.29E-15 |
| morphology of axons                    | 7.56E-15 | expression of protein                  | 3.19E-15 | expression of protein                  | 9.18E-16 | organization of organelle              | 5.45E-15 |
| abnormal morphology of plasma membrane | 9.00E-15 | polymerization of protein              | 3.52E-15 | quantity of cellular protrusions       | 1.41E-15 | formation of neurites                  | 7.62E-15 |
| seizure disorder                       | 1.03E-14 | quantity of cellular protrusions       | 7.31E-15 | abnormal morphology of neurites        | 1.48E-15 | polymerization of protein              | 7.86E-15 |
| catabolism of purine nucleotide        | 1.09E-14 | morphology of cells                    | 1.15E-14 | morphology of axons                    | 2.24E-15 | quantity of vesicles                   | 1.25E-14 |
| abnormal morphology of neurites        | 1.17E-14 | quantity of vesicles                   | 1.17E-14 | organization of organelle              | 3.25E-15 | quantity of synaptic vesicles          | 1.33E-14 |
| abnormal morphology of axons           | 1.48E-14 | abnormal morphology of neurons         | 1.25E-14 | engulfment of cells                    | 6.65E-15 | release of neurotransmitter            | 1.35E-14 |
| branching of cells                     | 1.86E-14 | catabolism of purine nucleotide        | 1.48E-14 | axonogenesis                           | 7.40E-15 | metabolism of dicarboxylic acid        | 1.36E-14 |
| Parkinson's disease                    | 1.94E-14 | morphology of axons                    | 1.66E-14 | replication of RNA virus               | 8.35E-15 | cognition                              | 1.75E-14 |
| cell death of neuroblastoma cell lines | 3.56E-14 | conformational modification of protein | 1.73E-14 | branching of cells                     | 9.12E-15 | abnormal morphology of nervous system  | 3.42E-14 |
| apoptosis of neurons                   | 4.58E-14 | apoptosis of neurons                   | 2.18E-14 | Mood Disorders                         | 1.04E-14 | translation of protein                 | 3.50E-14 |
| replication of Influenza A virus       | 5.98E-14 | myopathy                               | 2.34E-14 | cell death of neuroblastoma cell lines | 1.75E-14 | exocytosis of vesicles                 | 4.03E-14 |
| abnormal morphology of nervous system  | 7.54E-14 | hydrolysis of GTP                      | 2.37E-14 | stabilization of filaments             | 1.87E-14 | learning                               | 4.36E-14 |
| morphology of cells                    | 7.56E-14 | infection of cells                     | 3.98E-14 | seizure disorder                       | 2.20E-14 | polymerization of filaments            | 4.56E-14 |
| expression of protein                  | 9.87E-14 | folding of protein                     | 4.33E-14 | long term depression                   | 2.46E-14 | replication of virus                   | 6.73E-14 |
| myopathy                               | 1.02E-13 | replication of Influenza A virus       | 4.75E-14 | abnormal morphology of axons           | 2.89E-14 | quantity of cellular protrusions       | 7.15E-14 |
| metabolism of dicarboxylic acid        | 1.02E-13 | replication of RNA virus               | 5.96E-14 | seizures                               | 2.92E-14 | infection of cells                     | 1.28E-13 |
| formation of neurites                  | 1.30E-13 | long-term potentiation of synapse      | 8.28E-14 | endocytosis of vesicles                | 3.44E-14 | long term depression                   | 1.37E-13 |
| release of neurotransmitter            | 1.40E-13 | branching of cells                     | 9.05E-14 | release of neurotransmitter            | 3.49E-14 | apoptosis                              | 1.56E-13 |
| polymerization of filaments            | 1.95E-13 | plasticity of synapse                  | 1.10E-13 | abnormal morphology of nervous system  | 6.41E-14 | expression of protein                  | 1.64E-13 |
| engulfment of cells                    | 2.01E-13 | axonogenesis                           | 1.38E-13 | plasticity of synapse                  | 1.08E-13 | cell death of neuroblastoma cell lines | 2.01E-13 |
| sprouting                              | 2.12E-13 | seizure disorder                       | 1.65E-13 | replication of virus                   | 1.13E-13 | hydrolysis of nucleotide               | 2.81E-13 |
| seizures                               | 2.37E-13 | release of neurotransmitter            | 1.69E-13 | conformational modification of protein | 1.28E-13 | Mood Disorders                         | 3.26E-13 |
| infection of cells                     | 2.43E-13 | abnormal morphology of axons           | 2.07E-13 | morphology of cells                    | 1.73E-13 | axonogenesis                           | 3.36E-13 |
| quantity of vesicles                   | 2.85E-13 | Mood Disorders                         | 2.22E-13 | locomotion                             | 1.76E-13 | cell death of tumor cell lines         | 3.70E-13 |
| replication of RNA virus               | 3.12E-13 | seizures                               | 2.43E-13 | hydrolysis of GTP                      | 2.03E-13 | catabolism of ATP                      | 3.78E-13 |
| endocytosis of synaptic vesicles       | 3.13E-13 | abnormal morphology of neurites        | 2.58E-13 | formation of neurites                  | 2.57E-13 | seizure disorder                       | 4.20E-13 |
| excitatory postsynaptic current        | 4.21E-13 | exocytosis of vesicles                 | 2.89E-13 | targeting of protein                   | 2.69E-13 | formation of vesicles                  | 6.47E-13 |
| Mood Disorders                         | 1.02E-12 | abnormal morphology of plasma membrane | 3.43E-13 | folding of protein                     | 3.22E-13 | apoptosis of neurons                   | 1.27E-12 |

**Supp. Table 3 (cont.)**

| Eif2b5 <sup>M</sup> , w11                |          | WT, w11                                   |          | Eif2b5 <sup>M</sup> , w12             |          | WT, w12                                    |          |
|------------------------------------------|----------|-------------------------------------------|----------|---------------------------------------|----------|--------------------------------------------|----------|
| stabilization of filaments               | 1.54E-12 | catabolism of ATP                         | 6.25E-13 | sprouting                             | 3.55E-13 | long-term potentiation of synapse          | 1.30E-12 |
| catabolism of ATP                        | 6.08E-13 | cell death of neuroblastoma cell lines    | 3.19E-13 | exocytosis of vesicles                | 2.85E-13 | assembly of cell-cell contacts             | 7.36E-13 |
| locomotion                               | 1.64E-12 | replication of virus                      | 6.96E-13 | quantity of filaments                 | 5.32E-13 | synaptogenesis                             | 1.37E-12 |
| quantity of synaptic vesicles            | 1.76E-12 | long term depression                      | 1.01E-12 | quantity of vesicles                  | 5.39E-13 | endocytosis of synaptic vesicles           | 1.48E-12 |
| long-term potentiation of synapse        | 1.93E-12 | long-term potentiation of brain           | 1.04E-12 | morphology of central nervous system  | 9.89E-13 | assembly of intercellular junctions        | 2.51E-12 |
| targeting of protein                     | 3.31E-12 | endocytosis of synaptic vesicles          | 1.35E-12 | long-term potentiation of brain       | 1.02E-12 | organismal death                           | 2.73E-12 |
| infection by RNA virus                   | 3.64E-12 | targeting of protein                      | 1.55E-12 | metabolism of ATP                     | 1.16E-12 | infection by RNA virus                     | 2.75E-12 |
| assembly of cell-cell contacts           | 3.89E-12 | abnormal morphology of nervous system     | 1.60E-12 | apoptosis of tumor cell lines         | 1.69E-12 | formation of plasma membrane               | 4.14E-12 |
| axonogenesis                             | 4.62E-12 | locomotion                                | 1.69E-12 | infection of cells                    | 1.70E-12 | morphology of cells                        | 4.67E-12 |
| infection by Dengue virus 2              | 4.82E-12 | infection by RNA virus                    | 2.08E-12 | stabilization of microtubules         | 1.85E-12 | targeting of protein                       | 5.01E-12 |
| replication of virus                     | 4.90E-12 | morphology of central nervous system      | 2.52E-12 | potentiation of synapse               | 2.80E-12 | folding of protein                         | 6.12E-12 |
| recycling of synaptic vesicles           | 7.83E-12 | quantity of filaments                     | 2.72E-12 | cell movement                         | 3.11E-12 | development of gap junctions               | 6.27E-12 |
| benign neoplasia                         | 8.53E-12 | sprouting                                 | 3.03E-12 | assembly of cell-cell contacts        | 3.13E-12 | seizures                                   | 8.75E-12 |
| assembly of intercellular junctions      | 1.22E-11 | trafficking of vesicles                   | 3.38E-12 | apoptosis of neurons                  | 3.16E-12 | paralysis                                  | 1.86E-11 |
| hydrolysis of GTP                        | 1.24E-11 | apoptosis of tumor cell lines             | 3.41E-12 | bipolar disorder                      | 4.54E-12 | abnormal quantity of synaptic vesicles     | 2.94E-11 |
| synaptogenesis                           | 1.41E-11 | size of body                              | 3.63E-12 | spatial learning                      | 5.03E-12 | recycling of synaptic vesicles             | 3.54E-11 |
| development of gap junctions             | 1.82E-11 | stabilization of filaments                | 3.83E-12 | synaptogenesis                        | 5.03E-12 | plasticity of synapse                      | 5.58E-11 |
| quantity of filaments                    | 1.92E-11 | formation of neurites                     | 4.25E-12 | catabolism of purine nucleotide       | 6.20E-12 | infection by Dengue virus 2                | 6.05E-11 |
| excitatory postsynaptic potential        | 2.23E-11 | spatial learning                          | 5.15E-12 | formation of vesicles                 | 6.35E-12 | transport of inorganic cation              | 7.12E-11 |
| conformational modification of protein   | 2.91E-11 | cell movement                             | 5.67E-12 | long-term potentiation of synapse     | 8.22E-12 | morphology of central nervous system       | 7.23E-11 |
| paralysis                                | 3.51E-11 | cell death of fibroblast cell lines       | 7.46E-12 | development of gap junctions          | 8.41E-12 | Diamond-Blackfan anemia                    | 7.45E-11 |
| stabilization of microtubules            | 3.65E-11 | quantity of synaptic vesicles             | 1.03E-11 | metabolism of dicarboxylic acid       | 9.18E-12 | synthesis of purine nucleotide             | 8.08E-11 |
| spatial learning                         | 5.70E-11 | excitatory postsynaptic potential         | 1.19E-11 | assembly of intercellular junctions   | 9.43E-12 | benign neoplasia                           | 8.10E-11 |
| infection of hepatoma cell lines         | 5.96E-11 | infection of tumor cell lines             | 1.21E-11 | formation of microtubules             | 1.04E-11 | excitatory postsynaptic current            | 1.01E-10 |
| cell death of brain                      | 6.95E-11 | morphology of brain                       | 1.25E-11 | morphology of brain                   | 1.20E-11 | infection of tumor cell lines              | 1.52E-10 |
| formation of plasma membrane             | 7.70E-11 | formation of actin filaments              | 1.33E-11 | myopathy                              | 1.26E-11 | Neurodegeneration                          | 1.60E-10 |
| formation of vesicles                    | 7.71E-11 | synthesis of purine nucleotide            | 1.42E-11 | synthesis of purine nucleotide        | 1.39E-11 | cell death of central nervous system cells | 1.81E-10 |
| folding of protein                       | 7.94E-11 | synaptogenesis                            | 2.05E-11 | formation of plasma membrane          | 1.98E-11 | cell death of brain                        | 2.25E-10 |
| biosynthesis of purine ribonucleotide    | 1.01E-10 | recycling of synaptic vesicles            | 3.04E-11 | polymerization of actin filaments     | 2.61E-11 | long-term potentiation of brain            | 2.25E-10 |
| long term depression                     | 1.01E-10 | formation of vesicles                     | 3.40E-11 | endocytosis of synaptic vesicles      | 3.01E-11 | biosynthesis of purine ribonucleotide      | 2.26E-10 |
| cell movement                            | 1.32E-10 | biosynthesis of purine ribonucleotide     | 3.41E-11 | recycling of synaptic vesicles        | 3.01E-11 | cell movement                              | 2.30E-10 |
| infection of tumor cell lines            | 1.34E-10 | bundling of filaments                     | 3.59E-11 | infection by RNA virus                | 3.21E-11 | locomotion                                 | 2.54E-10 |
| autosomal dominant neuropathy            | 1.44E-10 | long-term potentiation of cerebral cortex | 3.66E-11 | biosynthesis of purine ribonucleotide | 3.35E-11 | metabolism of NADH                         | 2.71E-10 |
| cell death of cervical cancer cell lines | 1.48E-10 | mitochondrial disorder                    | 4.64E-11 | chronic psoriasis                     | 3.58E-11 | morphology of intercellular junctions      | 2.87E-10 |
| morphology of central nervous system     | 1.57E-10 | stabilization of microtubules             | 6.45E-11 | fusion of synaptic vesicles           | 4.08E-11 | formation of microtubules                  | 3.06E-10 |

**Supp. Table 3 (cont.)**

| Eif2b5 <sup>M</sup> , w11                     |          | WT, w11                                       |          | Eif2b5 <sup>M</sup> , w12                     |          | WT, w12                                       |          |
|-----------------------------------------------|----------|-----------------------------------------------|----------|-----------------------------------------------|----------|-----------------------------------------------|----------|
| cell death of central nervous system cells    | 1.66E-10 | autosomal dominant neuropathy                 | 6.75E-11 | cell movement of neurons                      | 5.46E-11 | cell spreading                                | 3.49E-10 |
| abnormal quantity of synaptic vesicles        | 1.51E-10 | translation of RNA                            | 6.19E-11 | formation of actin filaments                  | 3.93E-11 | formation of filopodia                        | 2.90E-10 |
| polymerization of actin filaments             | 1.77E-10 | formation of microtubules                     | 7.28E-11 | size of body                                  | 5.53E-11 | spatial learning                              | 4.46E-10 |
| chronic psoriasis                             | 1.78E-10 | cell death of central nervous system cells    | 9.69E-11 | translation of RNA                            | 6.05E-11 | stabilization of filaments                    | 4.52E-10 |
| formation of lamellipodia                     | 2.13E-10 | leukoencephalopathy                           | 9.90E-11 | abnormal morphology of central nervous system | 6.07E-11 | translation of RNA                            | 4.61E-10 |
| size of body                                  | 2.39E-10 | development of gap junctions                  | 1.18E-10 | infection of tumor cell lines                 | 6.33E-11 | quantity of filaments                         | 4.75E-10 |
| paired-pulse facilitation                     | 2.40E-10 | cell death of brain                           | 1.24E-10 | trafficking of vesicles                       | 6.75E-11 | hydrolysis of GTP                             | 5.23E-10 |
| Diamond-Blackfan anemia                       | 2.51E-10 | amyotrophic lateral sclerosis                 | 1.29E-10 | quantity of synaptic vesicles                 | 1.09E-10 | amyotrophic lateral sclerosis                 | 5.28E-10 |
| movement of organelle                         | 2.58E-10 | assembly of cell-cell contacts                | 1.29E-10 | cell death of fibroblast cell lines           | 1.15E-10 | infection of hepatoma cell lines              | 5.46E-10 |
| cell death of fibroblast cell lines           | 2.80E-10 | organization of filaments                     | 1.36E-10 | organization of filaments                     | 1.33E-10 | chronic psoriasis                             | 6.35E-10 |
| fatty acid metabolism                         | 3.65E-10 | morphology of cerebral cortex                 | 1.39E-10 | morphology of cerebral cortex                 | 1.36E-10 | mitochondrial disorder                        | 6.60E-10 |
| formation of microtubules                     | 4.41E-10 | metabolism of dicarboxylic acid               | 1.43E-10 | migration of cells                            | 1.45E-10 | excitatory postsynaptic potential             | 8.01E-10 |
| mitochondrial disorder                        | 4.45E-10 | abnormal morphology of central nervous system | 1.48E-10 | cell death of cervical cancer cell lines      | 1.54E-10 | fusion of synaptic vesicles                   | 8.36E-10 |
| miniature excitatory postsynaptic currents    | 5.00E-10 | exocytosis by pheochromocytoma cell lines     | 1.66E-10 | exocytosis by pheochromocytoma cell lines     | 1.65E-10 | polymerization of actin filaments             | 9.26E-10 |
| neurogenic muscular atrophy                   | 5.43E-10 | long-term potentiation of hippocampus         | 1.70E-10 | long-term potentiation of cerebral cortex     | 1.74E-10 | exocytosis by pheochromocytoma cell lines     | 1.03E-09 |
| peripheral neuropathy                         | 6.16E-10 | cell survival                                 | 1.81E-10 | migration of neurons                          | 1.85E-10 | morphology of brain                           | 1.06E-09 |
| synthesis of purine nucleotide                | 6.18E-10 | polymerization of actin filaments             | 1.83E-10 | excitatory postsynaptic current               | 1.86E-10 | trafficking of vesicles                       | 1.36E-09 |
| formation of actin filaments                  | 6.63E-10 | abnormal morphology of brain                  | 2.12E-10 | abnormal morphology of brain                  | 2.04E-10 | cell death of cerebral cortex cells           | 1.42E-09 |
| cell spreading                                | 7.95E-10 | formation of plasma membrane                  | 2.18E-10 | mitochondrial disorder                        | 2.18E-10 | abnormal morphology of central nervous system | 1.63E-09 |
| metabolism of NADH                            | 8.10E-10 | bundling of microtubules                      | 2.66E-10 | catabolism of ATP                             | 2.21E-10 | migration of cells                            | 1.78E-09 |
| apoptosis of tumor cell lines                 | 8.19E-10 | neurogenic muscular atrophy                   | 2.81E-10 | abnormal morphology of hippocampus layer      | 2.64E-10 | benign thyroid nodule                         | 1.78E-09 |
| paired-pulse facilitation of synapse          | 8.21E-10 | assembly of intercellular junctions           | 3.66E-10 | excitatory postsynaptic potential             | 2.72E-10 | metabolism of medium chain dicarboxylic acid  | 1.78E-09 |
| plasticity of synapse                         | 9.25E-10 | benign neoplasia                              | 4.17E-10 | cell spreading                                | 3.76E-10 | degeneration of nervous system                | 2.02E-09 |
| cell survival                                 | 1.03E-09 | migration of cells                            | 4.17E-10 | benign neoplasia                              | 3.99E-10 | organization of filaments                     | 2.13E-09 |
| morphology of brain                           | 1.29E-09 | translation of mRNA                           | 4.51E-10 | formation of filopodia                        | 4.17E-10 | paired-pulse facilitation                     | 2.35E-09 |
| Charcot-Marie-Tooth disease                   | 1.47E-09 | engulfment of tumor cell lines                | 6.02E-10 | translation of mRNA                           | 4.42E-10 | formation of actin filaments                  | 2.48E-09 |
| abnormal morphology of hippocampus layer      | 1.48E-09 | Charcot-Marie-Tooth disease                   | 6.84E-10 | bundling of filaments                         | 4.80E-10 | cell death of fibroblast cell lines           | 2.53E-09 |
| Neurodegeneration                             | 1.49E-09 | formation of lamellipodia                     | 8.08E-10 | leukoencephalopathy                           | 5.64E-10 | extension of cellular protrusions             | 2.55E-09 |
| bundling of filaments                         | 1.57E-09 | Neurodegeneration                             | 9.97E-10 | paralysis                                     | 6.21E-10 | cell survival                                 | 2.57E-09 |
| cell movement of neurons                      | 1.99E-09 | necrosis of kidney                            | 9.98E-10 | morphology of intercellular junctions         | 7.39E-10 | bipolar disorder                              | 3.11E-09 |
| abnormal morphology of central nervous system | 2.22E-09 | formation of focal adhesions                  | 1.08E-09 | cell death of central nervous system cells    | 7.75E-10 | degeneration of cells                         | 3.66E-09 |
| idiopathic dilated cardiomyopathy             | 2.27E-09 | formation of cellular inclusion bodies        | 1.27E-09 | long-term potentiation of hippocampus         | 8.04E-10 | translation of mRNA                           | 4.01E-09 |

**Supp. Table 3 (cont.)**

| Eif2b5 <sup>M</sup> , w11                     |          | WT, w11                                       |          | Eif2b5 <sup>M</sup> , w12                     |          | WT, w12                                       |          |
|-----------------------------------------------|----------|-----------------------------------------------|----------|-----------------------------------------------|----------|-----------------------------------------------|----------|
| transport of inorganic cation                 | 2.46E-09 | movement of organelle                         | 1.50E-09 | invasion of cells                             | 8.45E-10 | allergic pulmonary eosinophilia               | 4.19E-09 |
| fusion of synaptic vesicles                   | 2.23E-09 | cell death of cervical cancer cell lines      | 1.11E-09 | formation of lamellipodia                     | 7.92E-10 | formation of dendrites                        | 3.86E-09 |
| cell death of brain cells                     | 2.51E-09 | cell movement of neurons                      | 1.72E-09 | cell death of brain                           | 9.75E-10 | abnormal morphology of brain                  | 4.99E-09 |
| exocytosis by pheochromocytoma cell lines     | 3.06E-09 | cell movement of central nervous system cells | 1.95E-09 | long term depression of cells                 | 1.06E-09 | cell death of cervical cancer cell lines      | 5.11E-09 |
| migration of cells                            | 3.71E-09 | peripheral neuropathy                         | 2.17E-09 | cell movement of tumor cell lines             | 1.19E-09 | small GTPase mediated signal transduction     | 5.34E-09 |
| long-term potentiation of brain               | 3.81E-09 | transport of inorganic cation                 | 2.19E-09 | movement of organelle                         | 1.48E-09 | ataxia                                        | 5.55E-09 |
| cell movement of central nervous system cells | 4.32E-09 | infection by Dengue virus 2                   | 2.24E-09 | tremor                                        | 1.79E-09 | tremor                                        | 6.84E-09 |
| abnormal morphology of brain                  | 4.65E-09 | cell death of kidney cells                    | 2.26E-09 | cell movement of central nervous system cells | 1.92E-09 | cell movement of central nervous system cells | 7.30E-09 |
| cell death of cerebral cortex cells           | 4.67E-09 | small GTPase mediated signal transduction     | 2.32E-09 | metabolism of NADH                            | 1.97E-09 | idiopathic dilated cardiomyopathy             | 7.46E-09 |
| trafficking of vesicles                       | 5.49E-09 | bipolar disorder                              | 2.37E-09 | transport of inorganic cation                 | 2.13E-09 | apoptosis of tumor cell lines                 | 7.72E-09 |
| metabolism of medium chain dicarboxylic acid  | 5.88E-09 | infection of hepatoma cell lines              | 2.68E-09 | infection by Dengue virus 2                   | 2.22E-09 | leukoencephalopathy                           | 8.06E-09 |
| formation of filopodia                        | 6.36E-09 | cell death of brain cells                     | 3.10E-09 | synaptic transmission of nervous tissue       | 2.87E-09 | inclusion body myopathy                       | 8.79E-09 |
| ataxia                                        | 6.88E-09 | cell spreading                                | 3.11E-09 | cell death of cerebral cortex cells           | 3.10E-09 | differentiation of cells                      | 9.60E-09 |
| migration of neurons                          | 7.26E-09 | cell death of cerebral cortex cells           | 3.17E-09 | amyotrophic lateral sclerosis                 | 4.03E-09 | formation of lamellipodia                     | 1.06E-08 |
| tremor                                        | 8.02E-09 | morphology of intercellular junctions         | 4.04E-09 | cell survival                                 | 4.20E-09 | paired-pulse facilitation of synapse          | 1.13E-08 |
| differentiation of cells                      | 8.75E-09 | degeneration of cells                         | 4.17E-09 | abnormal morphology of cerebral cortex        | 4.69E-09 | cell death of brain cells                     | 1.17E-08 |
| bipolar disorder                              | 9.09E-09 | internalization of protein                    | 4.41E-09 | growth of axons                               | 4.78E-09 | degradation of mitochondria                   | 1.17E-08 |
| migration of central nervous system cells     | 9.22E-09 | proliferation of tumor cell lines             | 4.56E-09 | synthesis of ADP                              | 4.93E-09 | degeneration of neurites                      | 1.18E-08 |
| exocytosis of synaptic vesicles               | 9.95E-09 | abnormal morphology of hippocampus layer      | 4.66E-09 | formation of dendrites                        | 5.37E-09 | long-term potentiation of cerebral cortex     | 1.25E-08 |
| invasion of cells                             | 1.22E-08 | abnormal morphology of cerebral cortex        | 4.79E-09 | ataxia                                        | 5.64E-09 | transport of metal                            | 1.26E-08 |
| leukoencephalopathy                           | 1.32E-08 | fusion of synaptic vesicles                   | 4.96E-09 | autosomal dominant neuropathy                 | 6.22E-09 | morphology of cerebral cortex                 | 1.30E-08 |
| organization of filaments                     | 1.46E-08 | synthesis of ADP                              | 4.96E-09 | disassembly of filaments                      | 6.96E-09 | movement of organelle                         | 1.46E-08 |
| sensory neuropathy                            | 1.55E-08 | migration of brain cells                      | 5.19E-09 | cell movement of brain cells                  | 7.13E-09 | stabilization of microtubules                 | 1.55E-08 |
| organization of cellular membrane             | 1.59E-08 | infection of cervical cancer cell lines       | 5.48E-09 | abnormal quantity of synaptic vesicles        | 7.62E-09 | disruption of filaments                       | 1.61E-08 |
| morphology of intercellular junctions         | 1.66E-08 | migration of neurons                          | 5.58E-09 | expression of mRNA                            | 7.63E-09 | degeneration of axons                         | 1.70E-08 |
| length of plasma membrane projections         | 1.71E-08 | degeneration of nervous system                | 6.08E-09 | extension of cellular protrusions             | 8.28E-09 | conditioning                                  | 1.88E-08 |
| allergic pulmonary eosinophilia               | 1.83E-08 | excitatory postsynaptic current               | 6.69E-09 | quantity of plasma membrane projections       | 8.34E-09 | fatty acid metabolism                         | 2.01E-08 |
| extension of cellular protrusions             | 1.88E-08 | cell movement of brain cells                  | 7.24E-09 | paired-pulse facilitation                     | 9.46E-09 | growth of axons                               | 2.01E-08 |
| hereditary motor and sensory neuropathy       | 2.08E-08 | abnormal quantity of synaptic vesicles        | 7.69E-09 | inborn error of amino acid metabolism         | 1.10E-08 | fusion of vesicles                            | 2.41E-08 |
| migration of brain cells                      | 2.08E-08 | expression of mRNA                            | 7.81E-09 | proliferation of tumor cell lines             | 1.16E-08 | autosomal dominant neuropathy                 | 2.46E-08 |
| cell movement of brain cells                  | 2.12E-08 | cell death of kidney cell lines               | 8.11E-09 | infection of cervical cancer cell lines       | 1.19E-08 | cytokinesis                                   | 2.62E-08 |
| demyelinating peripheral neuropathy           | 2.45E-08 | chronic psoriasis                             | 9.21E-09 | oligomerization of protein                    | 1.43E-08 | infection by HIV-1                            | 2.89E-08 |

**Supp. Table 3 (cont.)**

| Eif2b5 <sup>M</sup> , w11                  |          | WT, w11                                    |          | Eif2b5 <sup>M</sup> , w12                  |          | WT, w12                                    |          |
|--------------------------------------------|----------|--------------------------------------------|----------|--------------------------------------------|----------|--------------------------------------------|----------|
| infection by HIV-1                         | 2.54E-08 | cell viability                             | 9.27E-09 | differentiation of cells                   | 1.59E-08 | miniature excitatory postsynaptic currents | 3.34E-08 |
| growth of axons                            | 2.20E-08 | Charcot-Marie-Tooth disease type 2         | 8.93E-09 | gliosis                                    | 1.28E-08 | mammary tumor                              | 2.68E-08 |
| oligomerization of protein                 | 2.58E-08 | paired-pulse facilitation                  | 9.57E-09 | Neurodegeneration                          | 1.80E-08 | receptor-mediated endocytosis              | 3.41E-08 |
| small GTPase mediated signal transduction  | 2.79E-08 | migration of central nervous system cells  | 1.39E-08 | infection of hepatoma cell lines           | 1.84E-08 | Nonaka myopathy                            | 3.95E-08 |
| polymerization of actin                    | 2.94E-08 | synaptic transmission of nervous tissue    | 1.39E-08 | length of plasma membrane projections      | 1.87E-08 | sporadic amyotrophic lateral sclerosis     | 4.35E-08 |
| inborn error of amino acid metabolism      | 3.16E-08 | synthesis of nucleotide                    | 1.81E-08 | neurogenic muscular atrophy                | 2.05E-08 | morphology of central nervous system cells | 4.68E-08 |
| long-term potentiation of cerebral cortex  | 3.32E-08 | miniature excitatory postsynaptic currents | 1.86E-08 | fatty acid metabolism                      | 2.07E-08 | cell movement of neurons                   | 4.74E-08 |
| degeneration of nervous system             | 3.38E-08 | demyelinating peripheral neuropathy        | 1.89E-08 | internalization of protein                 | 2.11E-08 | bundling of filaments                      | 4.91E-08 |
| translation of RNA                         | 3.69E-08 | length of plasma membrane projections      | 1.90E-08 | Diamond-Blackfan anemia                    | 2.25E-08 | fragmentation of mitochondria              | 4.91E-08 |
| long-term potentiation of hippocampus      | 3.97E-08 | receptor-mediated endocytosis              | 1.98E-08 | cell death of brain cells                  | 2.28E-08 | cell movement of brain cells               | 4.94E-08 |
| mammary tumor                              | 4.33E-08 | formation of filopodia                     | 2.09E-08 | psoriasis                                  | 2.28E-08 | fragmentation of Golgi apparatus           | 5.27E-08 |
| synaptic transmission of nervous tissue    | 4.41E-08 | fatty acid metabolism                      | 2.14E-08 | fusion of vesicles                         | 2.37E-08 | synthesis of ADP                           | 5.69E-08 |
| formation of dendrites                     | 4.74E-08 | sensory neuropathy                         | 2.14E-08 | migration of brain cells                   | 2.57E-08 | disassembly of filaments                   | 6.40E-08 |
| benign neoplasm of female genital organ    | 5.03E-08 | Diamond-Blackfan anemia                    | 2.26E-08 | small GTPase mediated signal transduction  | 2.74E-08 | length of plasma membrane projections      | 6.68E-08 |
| morphology of central nervous system cells | 5.37E-08 | infection by HIV-1                         | 2.60E-08 | paired-pulse facilitation of synapse       | 2.98E-08 | engulfment of tumor cell lines             | 7.48E-08 |
| amyotrophic lateral sclerosis              | 5.51E-08 | hereditary motor and sensory neuropathy    | 2.60E-08 | formation of cellular inclusion bodies     | 3.24E-08 | transport of monovalent inorganic cation   | 7.50E-08 |
| Charcot-Marie-Tooth disease type 2         | 5.68E-08 | extension of cellular protrusions          | 2.67E-08 | X-linked mental retardation                | 3.90E-08 | long-term potentiation of hippocampus      | 7.56E-08 |
| engulfment of tumor cell lines             | 6.04E-08 | paralysis                                  | 2.79E-08 | organization of actin filaments            | 4.08E-08 | biosynthesis of nucleoside triphosphate    | 7.74E-08 |
| translation of mRNA                        | 7.27E-08 | organization of cellular membrane          | 2.96E-08 | synthesis of nucleotide                    | 4.16E-08 | degeneration of neurons                    | 8.52E-08 |
| internalization of protein                 | 7.50E-08 | secretion of molecule                      | 2.98E-08 | morphology of central nervous system cells | 4.48E-08 | posttetanic potentiation                   | 8.79E-08 |
| fusion of cellular membrane                | 7.60E-08 | paired-pulse facilitation of synapse       | 3.01E-08 | fusion of cellular membrane                | 4.66E-08 | cell movement of tumor cell lines          | 9.60E-08 |
| abnormal morphology of metencephalon       | 7.60E-08 | cell death of connective tissue cells      | 3.24E-08 | mammary tumor                              | 4.71E-08 | size of body                               | 9.74E-08 |
| necrosis of kidney                         | 7.90E-08 | transmembrane potential of mitochondria    | 3.24E-08 | Charcot-Marie-Tooth disease                | 5.18E-08 | organization of plasma membrane            | 1.02E-07 |
| degeneration of cells                      | 8.16E-08 | invasion of cells                          | 3.93E-08 | conditioning                               | 5.74E-08 | abnormal morphology of hippocampus layer   | 1.06E-07 |
| uterine leiomyoma                          | 8.32E-08 | X-linked mental retardation                | 3.95E-08 | allergic pulmonary eosinophilia            | 6.00E-08 | exchange of nucleotide                     | 1.06E-07 |
| cell death of kidney cells                 | 8.80E-08 | cell viability of tumor cell lines         | 4.09E-08 | mitochondrial respiratory chain deficiency | 6.06E-08 | synaptic transmission of nervous tissue    | 1.12E-07 |
| cell death of kidney cell lines            | 9.42E-08 | development of central nervous system      | 4.10E-08 | respiratory rhythm                         | 6.06E-08 | gliosis                                    | 1.22E-07 |
| cell viability                             | 9.68E-08 | quantity of plasma membrane projections    | 4.12E-08 | migration of central nervous system cells  | 6.22E-08 | concentration of glutathione               | 1.24E-07 |
| mitochondrial respiratory chain deficiency | 1.13E-07 | morphology of central nervous system cells | 4.56E-08 | migration of tumor cell lines              | 6.33E-08 | Breast Cancer and Tumors                   | 1.25E-07 |
| length of neurites                         | 1.21E-07 | transport of metal                         | 5.94E-08 | idiopathic dilated cardiomyopathy          | 8.91E-08 | degeneration of brain                      | 1.46E-07 |

**Supp. Table 3 (cont.)**

| Eif2b5 <sup>M</sup> , w11               |          | WT, w11                                               |          | Eif2b5 <sup>M</sup> , w12                  |          | WT, w12                                  |          |
|-----------------------------------------|----------|-------------------------------------------------------|----------|--------------------------------------------|----------|------------------------------------------|----------|
| abnormal morphology of rhombencephalon  | 1.23E-07 | allergic pulmonary eosinophilia                       | 6.06E-08 | infection by HIV-1                         | 9.48E-08 | cell death of hippocampal cells          | 1.46E-07 |
| degeneration of axons                   | 1.20E-07 | organization of nervous tissue                        | 5.23E-08 | exchange of nucleotide                     | 6.79E-08 | cellular degradation                     | 1.41E-07 |
| development of cerebral cortex          | 1.13E-07 | fusion of cellular membrane                           | 4.71E-08 | bundling of microtubules                   | 6.79E-08 | metabolism of reactive oxygen species    | 1.36E-07 |
| elongation of neurites                  | 1.16E-07 | mammary tumor                                         | 4.98E-08 | endocytosis of protein                     | 6.79E-08 | psoriasis                                | 1.40E-07 |
| cytokinesis                             | 1.25E-07 | mitochondrial respiratory chain deficiency            | 6.12E-08 | transmembrane potential of mitochondria    | 9.49E-08 | breast cancer                            | 1.53E-07 |
| conditioning                            | 1.25E-07 | respiration of fibroblast cell lines                  | 6.30E-08 | length of neurites                         | 1.01E-07 | morphology of dendrites                  | 1.54E-07 |
| benign thyroid nodule                   | 1.26E-07 | endocytosis of protein                                | 6.84E-08 | abnormal respiratory rhythm                | 1.08E-07 | transport of ion                         | 1.54E-07 |
| sporadic amyotrophic lateral sclerosis  | 1.26E-07 | exchange of nucleotide                                | 6.84E-08 | cell viability                             | 1.10E-07 | infection of cervical cancer cell lines  | 1.57E-07 |
| transport of mitochondria               | 1.26E-07 | inclusion body myopathy                               | 7.44E-08 | depolymerization of filaments              | 1.12E-07 | ruffling                                 | 1.70E-07 |
| synthesis of ADP                        | 1.33E-07 | metabolism of NADH                                    | 7.99E-08 | degeneration of axons                      | 1.13E-07 | long term depression of synapse          | 1.76E-07 |
| autosomal dominant disease              | 1.48E-07 | degeneration of central nervous system                | 8.03E-08 | Breast Cancer and Tumors                   | 1.17E-07 | exocytosis of dense-core vesicles        | 1.80E-07 |
| prepulse inhibition                     | 1.51E-07 | tremor                                                | 8.48E-08 | polymerization of actin                    | 1.18E-07 | migration of neurons                     | 1.86E-07 |
| glycolysis of cells                     | 1.56E-07 | degradation of DNA                                    | 8.55E-08 | miniature excitatory postsynaptic currents | 1.18E-07 | proliferation of tumor cell lines        | 1.94E-07 |
| coordination                            | 1.73E-07 | idiopathic dilated cardiomyopathy                     | 8.99E-08 | secretion of molecule                      | 1.21E-07 | extension of plasma membrane projections | 1.97E-07 |
| Breast Cancer and Tumors                | 1.79E-07 | formation of dendrites                                | 9.01E-08 | cell death of connective tissue cells      | 1.21E-07 | organization of nervous tissue           | 2.11E-07 |
| primary cardiomyopathy                  | 1.82E-07 | metabolism of reactive oxygen species                 | 9.47E-08 | long term depression of neurons            | 1.31E-07 | internalization of protein               | 2.13E-07 |
| proliferation of tumor cell lines       | 1.83E-07 | degeneration of axons                                 | 1.14E-07 | breast cancer                              | 1.31E-07 | synthesis of ATP                         | 2.77E-07 |
| leiomyomatosis                          | 2.07E-07 | polymerization of actin                               | 1.19E-07 | engulfment of tumor cell lines             | 1.35E-07 | autosomal dominant disease               | 2.82E-07 |
| breast cancer                           | 2.09E-07 | phagocytosis                                          | 1.21E-07 | transport of metal                         | 1.41E-07 | processing of RNA                        | 2.86E-07 |
| fragmentation of Golgi apparatus        | 2.21E-07 | Breast Cancer and Tumors                              | 1.23E-07 | metabolism of glutamine family amino acid  | 1.46E-07 | rearrangement of cytoskeleton            | 2.88E-07 |
| cell death of hippocampal cells         | 2.33E-07 | fusion of vesicles                                    | 1.33E-07 | degeneration of cells                      | 1.49E-07 | long term depression of cells            | 2.90E-07 |
| infection of cervical cancer cell lines | 2.55E-07 | breast cancer                                         | 1.38E-07 | neurotransmission of brain cells           | 1.62E-07 | expression of mRNA                       | 3.01E-07 |
| morphology of cerebellum                | 2.72E-07 | autosomal dominant Charcot-Marie-Tooth disease type 2 | 1.39E-07 | biosynthesis of nucleoside triphosphate    | 1.80E-07 | distal myopathy                          | 3.01E-07 |
| expression of mRNA                      | 2.73E-07 | apoptosis of kidney cell lines                        | 1.45E-07 | cell death of kidney cells                 | 1.84E-07 | follicular adenoma                       | 3.01E-07 |
| morphology of cerebral cortex           | 2.79E-07 | modification of reactive oxygen species               | 1.47E-07 | necrosis of kidney                         | 1.87E-07 | modification of reactive oxygen species  | 3.01E-07 |
| quantity of filopodia                   | 2.85E-07 | disassembly of filaments                              | 1.49E-07 | polymerization of microtubules             | 1.90E-07 | cell viability                           | 3.10E-07 |
| rearrangement of cytoskeleton           | 3.15E-07 | conditioning                                          | 1.73E-07 | apoptosis of cervical cancer cell lines    | 2.10E-07 | invasion of cells                        | 3.33E-07 |
| bundling of microtubules                | 3.33E-07 | degeneration of brain                                 | 1.81E-07 | Mitochondrial complex I deficiency         | 2.11E-07 | migration of brain cells                 | 3.35E-07 |
| endocytosis of protein                  | 3.33E-07 | cell movement of tumor cell lines                     | 1.82E-07 | formation of focal adhesions               | 2.16E-07 | diffuse B-cell lymphoma                  | 3.53E-07 |
| exchange of nucleotide                  | 3.33E-07 | biosynthesis of nucleoside triphosphate               | 1.82E-07 | disruption of filaments                    | 2.21E-07 | transport of metal ion                   | 3.57E-07 |
| gliosis                                 | 3.34E-07 | gliosis                                               | 1.86E-07 | export of protein                          | 2.33E-07 | secretion of neurotransmitter            | 3.62E-07 |
| cell death of connective tissue cells   | 3.34E-07 | degradation of mitochondria                           | 1.92E-07 | morphology of dendrites                    | 2.35E-07 | formation of cellular inclusion bodies   | 4.03E-07 |
| synthesis of ATP                        | 3.97E-07 | release of catecholamine                              | 2.23E-07 | secretion of neurotransmitter              | 2.78E-07 | exocytosis of synaptic vesicles          | 4.57E-07 |



**Supp. Table 3 (cont.)**

| Eif2b5 <sup>M</sup> , w11               |          | WT, w11                                      |          | Eif2b5 <sup>M</sup> , w12                    |          | WT, w12                                     |          |
|-----------------------------------------|----------|----------------------------------------------|----------|----------------------------------------------|----------|---------------------------------------------|----------|
| abnormal morphology of cerebellum       | 4.06E-07 | disruption of filaments                      | 2.23E-07 | morphology of hippocampus                    | 2.84E-07 | oxidation of protein                        | 4.57E-07 |
| ruffling                                | 3.42E-07 | differentiation of cells                     | 1.98E-07 | receptor-mediated endocytosis                | 2.52E-07 | peripheral neuropathy                       | 4.11E-07 |
| degeneration of brain                   | 3.63E-07 | inborn error of amino acid metabolism        | 2.08E-07 | degeneration of nervous system               | 2.68E-07 | retraction of cellular protrusions          | 4.31E-07 |
| Cytosis                                 | 3.69E-07 | Mitochondrial complex I deficiency           | 2.12E-07 | rearrangement of cytoskeleton                | 2.77E-07 | Cytosis                                     | 4.54E-07 |
| receptor-mediated endocytosis           | 4.06E-07 | Nonaka myopathy                              | 2.25E-07 | metabolism of medium chain dicarboxylic acid | 2.96E-07 | formation of dendritic spines               | 4.71E-07 |
| exocytosis of dense-core vesicles       | 4.19E-07 | export of protein                            | 2.35E-07 | sporadic amyotrophic lateral sclerosis       | 2.96E-07 | quantity of dendritic spines                | 4.71E-07 |
| mitochondrial leukoencephalopathy       | 4.47E-07 | morphology of dendrites                      | 2.37E-07 | cell death of kidney cell lines              | 3.19E-07 | metabolism of oxalacetic acid               | 4.72E-07 |
| inclusion body myopathy                 | 4.76E-07 | rearrangement of cytoskeleton                | 2.80E-07 | cell spreading of tumor cell lines           | 3.24E-07 | quantity of plasma membrane projections     | 4.84E-07 |
| disassembly of filaments                | 4.98E-07 | secretion of neurotransmitter                | 2.83E-07 | metabolism of amino acids                    | 3.50E-07 | thyroid adenoma                             | 5.06E-07 |
| Leigh syndrome                          | 5.17E-07 | benign thyroid nodule                        | 2.98E-07 | quantity of actin filaments                  | 3.52E-07 | migration of central nervous system cells   | 5.16E-07 |
| transport of metal                      | 5.34E-07 | metabolism of medium chain dicarboxylic acid | 2.98E-07 | exocytosis of synaptic vesicles              | 3.52E-07 | organization of cellular membrane           | 5.23E-07 |
| retraction of cellular protrusions      | 5.53E-07 | sporadic amyotrophic lateral sclerosis       | 2.98E-07 | quantity of microtubules                     | 3.52E-07 | neurogenic muscular atrophy                 | 5.31E-07 |
| head and neck neoplasia                 | 5.78E-07 | transport of mitochondria                    | 2.98E-07 | organization of nervous tissue               | 3.89E-07 | size of axons                               | 5.58E-07 |
| transmembrane potential of mitochondria | 5.83E-07 | binding of GTP                               | 3.28E-07 | metabolism of amino acid analogs             | 4.00E-07 | systemic light chain amyloidosis            | 5.58E-07 |
| formation of cellular inclusion bodies  | 5.86E-07 | ataxia                                       | 3.42E-07 | synaptic transmission of brain cells         | 4.10E-07 | cell death of connective tissue cells       | 5.72E-07 |
| biosynthesis of nucleoside triphosphate | 5.98E-07 | exocytosis of synaptic vesicles              | 3.55E-07 | sensory neuropathy                           | 4.22E-07 | cell spreading of tumor cell lines          | 6.12E-07 |
| organization of actin filaments         | 5.98E-07 | quantity of microtubules                     | 3.55E-07 | synthesis of ATP                             | 4.43E-07 | neurodegeneration of central nervous system | 6.24E-07 |
| disruption of filaments                 | 6.14E-07 | cellular degradation                         | 3.70E-07 | elongation of neurites                       | 4.80E-07 | abnormal morphology of cerebral cortex      | 6.55E-07 |
| glioblastoma cancer                     | 6.15E-07 | neurodegeneration of central nervous system  | 3.72E-07 | metabolism of acidic amino acid              | 4.90E-07 | length of neurites                          | 6.66E-07 |
| metabolism of reactive oxygen species   | 6.15E-07 | cytokinesis                                  | 3.82E-07 | emotional behavior                           | 5.08E-07 | fusion of cellular membrane                 | 6.90E-07 |
| endoplasmic reticulum stress response   | 6.70E-07 | respiratory rhythm                           | 4.14E-07 | size of brain                                | 5.13E-07 | stabilization of protein                    | 7.64E-07 |
| emotional behavior                      | 6.72E-07 | transformation of fibroblast cell lines      | 4.20E-07 | long term depression of synapse              | 5.31E-07 | elongation of neurites                      | 7.88E-07 |
| organization of plasma membrane         | 6.77E-07 | synthesis of ATP                             | 4.49E-07 | hereditary motor and sensory neuropathy      | 5.44E-07 | retraction of plasma membrane projections   | 8.26E-07 |
| quantity of plasma membrane projections | 7.09E-07 | cognitive impairment                         | 4.54E-07 | long term depression of brain cells          | 5.56E-07 | transformation of fibroblast cell lines     | 8.61E-07 |
| respiratory rhythm                      | 7.72E-07 | degeneration of neurons                      | 4.80E-07 | fusion of myoblasts                          | 5.58E-07 | shape change of tumor cell lines            | 8.64E-07 |
| long term depression of synapse         | 8.50E-07 | elongation of neurites                       | 4.85E-07 | homotetramerization of protein               | 5.58E-07 | breast or ovarian cancer                    | 8.75E-07 |
| development of central nervous system   | 8.50E-07 | size of brain                                | 5.20E-07 | development of central nervous system        | 5.62E-07 | mitochondrial leukoencephalopathy           | 8.95E-07 |
| distal myopathy                         | 8.53E-07 | length of neurites                           | 5.39E-07 | nuclear export of protein                    | 5.72E-07 | oligomerization of protein                  | 9.43E-07 |
| follicular adenoma                      | 8.53E-07 | long term depression of cells                | 5.52E-07 | shape change of tumor cell lines             | 5.90E-07 | M phase                                     | 9.45E-07 |
| formation of endocytotic vesicle        | 8.53E-07 | fragmentation of mitochondria                | 5.60E-07 | demyelinating peripheral neuropathy          | 6.22E-07 | reorganization of cytoskeleton              | 9.58E-07 |
| modification of reactive oxygen species | 8.53E-07 | cell death of pheochromocytoma cell lines    | 5.60E-07 | fusion of muscle cells                       | 6.22E-07 | sensory neuropathy                          | 9.81E-07 |
| organization of nervous tissue          | 8.61E-07 | homotetramerization of protein               | 5.64E-07 | extension of plasma membrane projections     | 6.82E-07 | abnormal morphology of metencephalon        | 1.10E-06 |
| glycolysis                              | 9.23E-07 | growth of axons                              | 6.89E-07 | prepulse inhibition                          | 7.00E-07 | mitochondrial respiratory chain deficiency  | 1.23E-06 |

**Supp. Table 3 (cont.)**

| Eif2b5 <sup>M</sup> , w11                             |          | WT, w11                                  |          | Eif2b5 <sup>M</sup> , w12              |          | WT, w12                                   |          |
|-------------------------------------------------------|----------|------------------------------------------|----------|----------------------------------------|----------|-------------------------------------------|----------|
| breast or ovarian cancer                              | 9.40E-07 | extension of plasma membrane projections | 6.93E-07 | homo-oligomerization of protein        | 7.26E-07 | transport of H+                           | 1.23E-06 |
| Mitochondrial complex I deficiency                    | 8.99E-07 | nuclear export of protein                | 5.76E-07 | quantity of dendritic spines           | 6.96E-07 | cell movement of kidney cell lines        | 1.10E-06 |
| release of vesicles                                   | 8.99E-07 | transmembrane potential                  | 6.75E-07 | concentration of glutathione           | 7.00E-07 | morphology of tumor cell lines            | 1.23E-06 |
| morphology of dendrites                               | 1.00E-06 | transport of monovalent inorganic cation | 7.03E-07 | metabolism of reactive oxygen species  | 7.67E-07 | HIV infection                             | 1.27E-06 |
| homotetramerization of protein                        | 1.03E-06 | concentration of glutathione             | 7.08E-07 | exocytosis of dense-core vesicles      | 8.29E-07 | bundling of microtubules                  | 1.39E-06 |
| size of axons                                         | 1.03E-06 | breast or ovarian cancer                 | 7.45E-07 | disassembly of focal adhesions         | 8.32E-07 | endocytosis of protein                    | 1.39E-06 |
| systemic light chain amyloidosis                      | 1.03E-06 | organization of actin filaments          | 7.61E-07 | contraction of heart                   | 8.83E-07 | abnormal morphology of rhombencephalon    | 1.41E-06 |
| abnormal morphology of cerebral cortex                | 1.05E-06 | proliferation of fibroblast cell lines   | 7.64E-07 | polarization of cells                  | 8.83E-07 | extension of neurites                     | 1.41E-06 |
| growth of organism                                    | 1.08E-06 | abnormal respiratory rhythm              | 7.65E-07 | transport of metal ion                 | 9.05E-07 | primary cardiomyopathy                    | 1.45E-06 |
| instability of microtubules                           | 1.09E-06 | major depression                         | 7.73E-07 | release of catecholamine               | 9.06E-07 | axonal transport                          | 1.46E-06 |
| metabolism of oxalacetic acid                         | 1.09E-06 | growth of organism                       | 8.06E-07 | density of dendritic spines            | 9.17E-07 | synthesis of reactive oxygen species      | 1.46E-06 |
| psoriasis                                             | 1.11E-06 | phagocytosis of tumor cell lines         | 8.10E-07 | outgrowth of axons                     | 9.75E-07 | dystonia                                  | 1.54E-06 |
| autosomal dominant Charcot-Marie-Tooth disease type 2 | 1.13E-06 | exocytosis of dense-core vesicles        | 8.33E-07 | Renal Cancer and Tumors                | 9.95E-07 | hereditary motor and sensory neuropathy   | 1.57E-06 |
| synthesis of nucleotide                               | 1.13E-06 | viral entry by Influenza virus           | 8.47E-07 | export of molecule                     | 1.02E-06 | Leigh syndrome                            | 1.57E-06 |
| tetramerization of protein                            | 1.15E-06 | development of cerebral cortex           | 8.67E-07 | peripheral neuropathy                  | 1.02E-06 | necrosis of kidney                        | 1.59E-06 |
| cellular degradation                                  | 1.18E-06 | polarization of cells                    | 8.98E-07 | quantity of actin stress fibers        | 1.03E-06 | production of reactive oxygen species     | 1.59E-06 |
| epilepsy                                              | 1.21E-06 | transport of metal ion                   | 9.25E-07 | degeneration of central nervous system | 1.04E-06 | organization of actin filaments           | 1.62E-06 |
| formation of focal adhesions                          | 1.22E-06 | oligomerization of protein               | 9.78E-07 | depolymerization of microtubules       | 1.04E-06 | Charcot-Marie-Tooth disease               | 1.63E-06 |
| infection of embryonic cell lines                     | 1.34E-06 | neurotransmission of brain cells         | 1.02E-06 | breast or ovarian cancer               | 1.07E-06 | Ewing's sarcoma                           | 1.63E-06 |
| infection of epithelial cell lines                    | 1.34E-06 | Renal Cancer and Tumors                  | 1.03E-06 | memory                                 | 1.10E-06 | plasma cell dyscrasia                     | 1.80E-06 |
| morphology of brain cells                             | 1.34E-06 | quantity of actin stress fibers          | 1.04E-06 | inclusion body myopathy                | 1.11E-06 | abnormal morphology of cerebellum         | 1.81E-06 |
| mitochondrial encephalomyopathy                       | 1.35E-06 | morphology of hippocampus                | 1.05E-06 | length of dendritic spines             | 1.11E-06 | synthesis of nucleotide                   | 1.82E-06 |
| dystonia                                              | 1.38E-06 | processing of RNA                        | 1.08E-06 | cytokinesis                            | 1.14E-06 | density of dendritic spines               | 1.83E-06 |
| cell movement of tumor cell lines                     | 1.39E-06 | length of dendritic spines               | 1.11E-06 | Cytosis                                | 1.17E-06 | coordination                              | 1.84E-06 |
| transport of ion                                      | 1.40E-06 | fragmentation of DNA                     | 1.20E-06 | myelination                            | 1.18E-06 | osteosarcoma                              | 1.88E-06 |
| quantity of microtubules                              | 1.41E-06 | cell death of hippocampal cells          | 1.21E-06 | cell death of hippocampal cells        | 1.19E-06 | release of catecholamine                  | 1.90E-06 |
| infection of kidney cell lines                        | 1.50E-06 | cell death of muscle cells               | 1.23E-06 | shape change of fibroblast cell lines  | 1.19E-06 | cell death of kidney cell lines           | 1.92E-06 |
| abnormal respiratory rhythm                           | 1.59E-06 | psoriasis                                | 1.28E-06 | abnormal morphology of hippocampus     | 1.20E-06 | cell death of pheochromocytoma cell lines | 1.93E-06 |
| transport of metal ion                                | 1.68E-06 | cell death of muscle                     | 1.32E-06 | carcinoma in larynx                    | 1.22E-06 | Waldenstrom's macroglobulinemia           | 1.99E-06 |
| thyroid adenoma                                       | 1.71E-06 | quantity of neurites                     | 1.35E-06 | quantity of neurites                   | 1.34E-06 | formation of cytoplasmic aggregates       | 2.02E-06 |
| neurotransmission of brain cells                      | 1.77E-06 | mitochondrial leukoencephalopathy        | 1.40E-06 | formation of membrane ruffles          | 1.35E-06 | mitochondrial encephalomyopathy           | 2.07E-06 |
| transport of carboxylic acid                          | 2.18E-06 | localization of protein                  | 1.43E-06 | action potential of cells              | 1.51E-06 | modification of hydrogen peroxide         | 2.22E-06 |

**Supp. Table 3 (cont.)**

| Eif2b5 <sup>M</sup> , w11                   |          | WT, w11                                    |          | Eif2b5 <sup>M</sup> , w12                 |          | WT, w12                                          |          |
|---------------------------------------------|----------|--------------------------------------------|----------|-------------------------------------------|----------|--------------------------------------------------|----------|
| Nonaka myopathy                             | 2.47E-06 | renal cancer                               | 1.44E-06 | activation of enzyme                      | 1.52E-06 | refractory classical Hodgkin lymphoma            | 2.22E-06 |
| degeneration of neurons                     | 1.80E-06 | polymerization of microtubules             | 1.40E-06 | mitochondrial leukoencephalopathy         | 1.39E-06 | polymerization of actin                          | 2.07E-06 |
| HIV infection                               | 1.85E-06 | Leigh syndrome                             | 1.40E-06 | renal cancer                              | 1.39E-06 | cell death of kidney cells                       | 2.17E-06 |
| quantity of actin filaments                 | 1.96E-06 | binding of microtubules                    | 1.40E-06 | Leigh syndrome                            | 1.39E-06 | glycolysis of cells                              | 2.21E-06 |
| systemic amyloidosis                        | 2.47E-06 | infection of embryonic cell lines          | 1.47E-06 | transmembrane potential                   | 1.65E-06 | relapsed classical Hodgkin lymphoma              | 2.22E-06 |
| shape change of tumor cell lines            | 2.63E-06 | infection of epithelial cell lines         | 1.47E-06 | organization of cellular membrane         | 1.67E-06 | reactive gliosis                                 | 2.26E-06 |
| outgrowth of axons                          | 2.75E-06 | action potential of cells                  | 1.53E-06 | size of axons                             | 1.70E-06 | length of dendritic spines                       | 2.57E-06 |
| neurodegeneration of central nervous system | 2.90E-06 | HIV infection                              | 1.62E-06 | systemic light chain amyloidosis          | 1.70E-06 | apoptosis of pheochromocytoma cell lines         | 2.61E-06 |
| shape change of plasma membrane             | 2.96E-06 | depressive disorder                        | 1.68E-06 | shape of cells                            | 1.77E-06 | neurotransmission of brain cells                 | 2.65E-06 |
| cell viability of tumor cell lines          | 3.00E-06 | quantity of actin filaments                | 1.70E-06 | degradation of DNA                        | 1.89E-06 | dilated cardiomyopathy                           | 3.00E-06 |
| apoptosis of cervical cancer cell lines     | 3.14E-06 | size of axons                              | 1.71E-06 | organic aciduria                          | 1.90E-06 | renal cancer                                     | 3.01E-06 |
| abnormal morphology of cells                | 3.15E-06 | infection of kidney cell lines             | 1.78E-06 | ruffling                                  | 1.93E-06 | metabolism of fructose-1,6-diphosphate           | 3.19E-06 |
| concentration of glutathione                | 3.58E-06 | shape change of tumor cell lines           | 1.89E-06 | cell death of pheochromocytoma cell lines | 1.94E-06 | metabolism of malic acid                         | 3.19E-06 |
| organic aciduria                            | 3.69E-06 | ruffling                                   | 1.95E-06 | Charcot-Marie-Tooth disease type 2        | 1.97E-06 | size of synapse                                  | 3.19E-06 |
| transport of monovalent inorganic cation    | 3.71E-06 | distal myopathy                            | 1.98E-06 | distal myopathy                           | 1.97E-06 | paralysis of limb                                | 3.25E-06 |
| cell viability of neuroblastoma cell lines  | 3.79E-06 | follicular adenoma                         | 1.98E-06 | modification of reactive oxygen species   | 1.97E-06 | cell-cell adhesion                               | 3.26E-06 |
| metabolism of amino acid analogs            | 3.79E-06 | formation of endocytotic vesicle           | 1.98E-06 | abnormal morphology of metencephalon      | 1.99E-06 | quantity of phosphatidylinositol 4,5-diphosphate | 3.30E-06 |
| secretion of neurotransmitter               | 3.80E-06 | production of reactive oxygen species      | 2.06E-06 | coordination                              | 2.02E-06 | release of vesicles                              | 3.30E-06 |
| viral entry by Influenza virus              | 3.86E-06 | actin capping                              | 2.15E-06 | degradation of amino acids                | 2.08E-06 | prepulse inhibition                              | 3.31E-06 |
| atrophy of muscle                           | 3.96E-06 | instability of microtubules                | 2.15E-06 | actin capping                             | 2.14E-06 | Renal Cancer and Tumors                          | 3.38E-06 |
| reorganization of cytoskeleton              | 4.05E-06 | morphology of brain cells                  | 2.29E-06 | instability of microtubules               | 2.14E-06 | blood protein disorder                           | 3.38E-06 |
| cell spreading of tumor cell lines          | 4.06E-06 | cell viability of neuroblastoma cell lines | 2.31E-06 | long term depression of Purkinje cells    | 2.14E-06 | abnormal morphology of cerebellar cortex         | 3.55E-06 |
| aplastic anemia                             | 4.10E-06 | elongation of cellular protrusions         | 2.49E-06 | metabolism of oxalacetic acid             | 2.14E-06 | diffuse small-cell lymphoma                      | 3.62E-06 |
| fusion of vesicles                          | 4.10E-06 | retraction of cellular protrusions         | 2.49E-06 | bone sarcoma                              | 2.24E-06 | inclusion body myositis                          | 3.74E-06 |
| astrocytoma                                 | 4.21E-06 | size of embryo                             | 2.51E-06 | release of vesicles                       | 2.24E-06 | morphology of hippocampus                        | 4.16E-06 |
| memory                                      | 4.22E-06 | synaptic transmission of brain cells       | 2.56E-06 | degeneration of brain                     | 2.26E-06 | formation of endocytotic vesicle                 | 4.22E-06 |
| organization of mitochondria                | 4.38E-06 | synthesis of reactive oxygen species       | 2.58E-06 | morphology of brain cells                 | 2.26E-06 | development of hippocampal neurons               | 4.23E-06 |
| abnormal morphology of cerebellar cortex    | 4.39E-06 | atrophy of muscle                          | 2.64E-06 | cognitive impairment                      | 2.45E-06 | shape change of plasma membrane                  | 4.27E-06 |
| reactive gliosis                            | 4.65E-06 | contraction of heart                       | 2.65E-06 | retraction of cellular protrusions        | 2.46E-06 | M phase of cervical cancer cell lines            | 4.31E-06 |
| production of reactive oxygen species       | 4.73E-06 | Cytosis                                    | 2.74E-06 | Ewing's sarcoma                           | 2.64E-06 | long term depression of brain cells              | 4.55E-06 |
| concentration of ATP                        | 5.31E-06 | autosomal dominant disease                 | 3.23E-06 | abnormal morphology of rhombencephalon    | 3.13E-06 | long term depression of neurons                  | 4.99E-06 |

**Supp. Table 3 (cont.)**

| Eif2b5 <sup>M</sup> , w11                |          | WT, w11                                        |          | Eif2b5 <sup>M</sup> , w12                      |          | WT, w12                                           |          |
|------------------------------------------|----------|------------------------------------------------|----------|------------------------------------------------|----------|---------------------------------------------------|----------|
| M phase                                  | 5.70E-06 | emotional behavior                             | 3.28E-06 | Waldenstrom's macroglobulinemia                | 3.35E-06 | cell viability of neuroblastoma cell lines        | 5.37E-06 |
| synthesis of reactive oxygen species     | 4.77E-06 | localization of mitochondria                   | 2.96E-06 | development of cerebral cortex                 | 2.77E-06 | tetramerization of protein                        | 4.77E-06 |
| synaptic transmission of brain cells     | 4.81E-06 | formation of actin stress fibers               | 2.97E-06 | formation of actin stress fibers               | 2.92E-06 | quantity of cellular inclusion bodies             | 4.90E-06 |
| modification of hydrogen peroxide        | 5.05E-06 | organization of plasma membrane                | 3.03E-06 | fusion of cells                                | 2.92E-06 | transport of L-glutamic acid                      | 4.90E-06 |
| polarization of neurons                  | 5.05E-06 | prepulse inhibition                            | 3.21E-06 | organization of plasma membrane                | 3.00E-06 | size of brain                                     | 4.97E-06 |
| association of vesicles                  | 5.87E-06 | fusion of myoblasts                            | 3.38E-06 | infection of embryonic cell lines              | 3.36E-06 | quantity of intermediate filaments                | 5.39E-06 |
| metabolism of fructose-1,6-diphosphate   | 5.87E-06 | Waldenstrom's macroglobulinemia                | 3.40E-06 | infection of epithelial cell lines             | 3.36E-06 | formation of focal adhesions                      | 5.48E-06 |
| metabolism of malic acid                 | 5.87E-06 | apoptosis of fibroblast cell lines             | 3.45E-06 | epilepsy                                       | 3.42E-06 | inborn error of amino acid metabolism             | 5.55E-06 |
| fatty acid oxidation disorder            | 5.98E-06 | oxidation of protein                           | 3.52E-06 | oxidation of protein                           | 3.50E-06 | quantity of neurites                              | 5.69E-06 |
| Clathrin mediated endocytosis            | 6.09E-06 | M phase                                        | 3.61E-06 | M phase                                        | 3.55E-06 | phagocytosis                                      | 6.24E-06 |
| length of dendritic spines               | 6.44E-06 | Clathrin mediated endocytosis                  | 3.84E-06 | primary cardiomyopathy                         | 3.81E-06 | disassembly of focal adhesions                    | 6.29E-06 |
| organization of actin                    | 6.64E-06 | apoptosis of pheochromocytoma cell lines       | 4.02E-06 | phagocytosis                                   | 3.97E-06 | outgrowth of axons                                | 6.41E-06 |
| export of protein                        | 6.85E-06 | action potential of neurons                    | 4.11E-06 | infection of kidney cell lines                 | 4.01E-06 | binding of filaments                              | 6.60E-06 |
| homo-oligomerization of protein          | 6.86E-06 | endoplasmic reticulum stress response          | 4.11E-06 | action potential of neurons                    | 4.05E-06 | polymerization of microtubules                    | 6.60E-06 |
| quantity of actin stress fibers          | 6.98E-06 | abnormal morphology of hippocampus             | 4.34E-06 | reorganization of cytoskeleton                 | 4.21E-06 | endocrine gland tumor                             | 6.61E-06 |
| size of brain                            | 7.02E-06 | mitochondrial encephalomyopathy                | 4.42E-06 | production of reactive oxygen species          | 4.26E-06 | synthesis of phosphatidylinositol 4,5-diphosphate | 6.69E-06 |
| extension of plasma membrane projections | 7.13E-06 | thyroid adenoma                                | 4.55E-06 | cell viability of tumor cell lines             | 4.28E-06 | morphology of synapse                             | 6.70E-06 |
| respiratory system tumor                 | 7.37E-06 | synaptic transmission of cerebral cortex cells | 4.84E-06 | mitochondrial encephalomyopathy                | 4.38E-06 | glycolysis                                        | 6.82E-06 |
| density of dendritic spines              | 7.65E-06 | activation of vesicles                         | 4.85E-06 | benign thyroid nodule                          | 4.50E-06 | reorganization of actin cytoskeleton              | 7.02E-06 |
| failure of bone marrow                   | 7.65E-06 | formation of endosomes                         | 4.85E-06 | elongation of filaments                        | 4.50E-06 | docking of vesicles                               | 7.13E-06 |
| long term depression of cells            | 7.70E-06 | systemic amyloidosis                           | 4.85E-06 | transport of mitochondria                      | 4.50E-06 | cognitive impairment                              | 7.20E-06 |
| morphology of hippocampus                | 8.07E-06 | density of dendritic spines                    | 4.91E-06 | thyroid adenoma                                | 4.52E-06 | secretion of molecule                             | 7.48E-06 |
| Waldenstrom's macroglobulinemia          | 8.29E-06 | neurodegeneration of brain                     | 4.91E-06 | Growth Failure                                 | 4.73E-06 | abnormal morphology of white matter               | 7.54E-06 |
| hypertrophy of heart                     | 8.70E-06 | fragmentation of Golgi apparatus               | 4.95E-06 | tetramerization of protein                     | 4.75E-06 | cell death of pyramidal neurons                   | 7.54E-06 |
| morphology of mitochondria               | 9.64E-06 | quantity of dendritic spines                   | 4.95E-06 | synaptic transmission of cerebral cortex cells | 4.80E-06 | density of filaments                              | 7.54E-06 |
| apoptosis of kidney cell lines           | 9.68E-06 | cell spreading of tumor cell lines             | 5.01E-06 | Nonaka myopathy                                | 4.82E-06 | phagocytosis by macrophage cancer cell lines      | 7.54E-06 |
| paralysis of limb                        | 9.69E-06 | docking of vesicles                            | 5.36E-06 | activation of vesicles                         | 4.82E-06 | quantity of lamellipodia                          | 7.54E-06 |
| myelination                              | 1.01E-05 | head and neck neoplasia                        | 5.80E-06 | systemic amyloidosis                           | 4.82E-06 | branching of axons                                | 7.58E-06 |
| congenital aplastic anemia               | 1.01E-05 | cell movement of kidney cell lines             | 6.22E-06 | transport of monovalent inorganic cation       | 4.87E-06 | formation of membrane ruffles                     | 7.58E-06 |
| development of hippocampus               | 1.03E-05 | electrophysiology of nervous system            | 6.24E-06 | invasion of tumor cell lines                   | 4.96E-06 | transmembrane potential of mitochondria           | 7.60E-06 |
| release of catecholamine                 | 1.13E-05 | quantity of filopodia                          | 6.49E-06 | transformation of fibroblast cell lines        | 5.84E-06 | contraction of heart                              | 8.25E-06 |

**Supp. Table 3 (cont.)**

| Eif2b5 <sup>M</sup> , w11                              |          | WT, w11                                      |          | Eif2b5 <sup>M</sup> , w12                            |          | WT, w12                                      |          |
|--------------------------------------------------------|----------|----------------------------------------------|----------|------------------------------------------------------|----------|----------------------------------------------|----------|
| metabolism of amino acids                              | 1.19E-05 | accumulation of vesicles                     | 6.77E-06 | astrocytoma                                          | 5.85E-06 | polarization of cells                        | 8.25E-06 |
| quantity of intermediate filaments                     | 1.10E-05 | morphology of tumor cell lines               | 6.45E-06 | cell movement of breast cancer cell lines            | 5.84E-06 | quantity of actin stress fibers              | 8.17E-06 |
| synthesis of acyl-coenzyme A                           | 1.05E-05 | excitatory postsynaptic potential of neurons | 6.36E-06 | dystonia                                             | 5.05E-06 | metabolism of monosaccharide                 | 7.80E-06 |
| abnormal morphology of hippocampus                     | 1.05E-05 | phagocytosis of cells                        | 6.36E-06 | myogenesis                                           | 5.25E-06 | synaptic transmission of brain cells         | 7.88E-06 |
| disruption of Golgi apparatus                          | 1.10E-05 | morphology of fibroblast cell lines          | 6.41E-06 | docking of vesicles                                  | 5.32E-06 | morphology of brain cells                    | 7.98E-06 |
| priming of vesicles                                    | 1.10E-05 | transport of ion                             | 6.43E-06 | cellular degradation                                 | 5.58E-06 | adrenal gland tumor                          | 8.07E-06 |
| formation of actin stress fibers                       | 1.20E-05 | apoptosis of cervical cancer cell lines      | 7.14E-06 | branching of axons                                   | 6.13E-06 | Clathrin mediated endocytosis                | 8.34E-06 |
| transmembrane potential                                | 1.23E-05 | blebbing                                     | 7.41E-06 | morphology of cerebellum                             | 6.14E-06 | myelination                                  | 8.42E-06 |
| cell death of hippocampal neurons                      | 1.28E-05 | uterine leiomyoma                            | 7.68E-06 | apoptosis of kidney cell lines                       | 6.27E-06 | carcinoma in larynx                          | 8.57E-06 |
| oxidation of protein                                   | 1.33E-05 | concentration of ATP                         | 7.90E-06 | transport of ion                                     | 6.27E-06 | loss of neurites                             | 8.57E-06 |
| quantity of cellular inclusion bodies                  | 1.33E-05 | posttetanic potentiation                     | 8.02E-06 | aciduria                                             | 6.30E-06 | metabolism of carbohydrate                   | 8.87E-06 |
| transport of L-glutamic acid                           | 1.33E-05 | migration of tumor cell lines                | 8.33E-06 | morphology of fibroblast cell lines                  | 6.35E-06 | contextual conditioning                      | 9.44E-06 |
| fragmentation of mitochondria                          | 1.35E-05 | actin capping of filament barbed ends        | 8.36E-06 | quantity of filopodia                                | 6.45E-06 | binding of lipid                             | 9.48E-06 |
| development of muscle                                  | 1.57E-05 | reactive gliosis                             | 8.36E-06 | reorganization of actin cytoskeleton                 | 6.50E-06 | epilepsy                                     | 9.56E-06 |
| secretion of molecule                                  | 1.58E-05 | phosphorylation of nucleotide                | 8.81E-06 | shape change of axons                                | 6.99E-06 | chronic kidney disease                       | 9.67E-06 |
| neuroepithelial tumor                                  | 1.59E-05 | carcinoma in larynx                          | 9.12E-06 | degeneration of neurons                              | 7.54E-06 | replenishment of vesicles                    | 9.95E-06 |
| cell death of muscle cells                             | 1.60E-05 | binding of filaments                         | 9.16E-06 | binding of GTP                                       | 7.81E-06 | abnormal morphology of dendrites             | 9.97E-06 |
| autosomal recessive Charcot-Marie-Tooth disease type 2 | 1.63E-05 | myelination                                  | 9.40E-06 | posttetanic potentiation                             | 7.98E-06 | cytokinesis of cervical cancer cell lines    | 9.97E-06 |
| replenishment of vesicles                              | 1.63E-05 | cell movement of fibroblast cell lines       | 9.45E-06 | HIV infection                                        | 8.02E-06 | homotetramerization of protein               | 9.97E-06 |
| synthesis of phosphatidylinositol 4,5-diphosphate      | 1.65E-05 | association of vesicles                      | 9.65E-06 | development of muscle                                | 8.04E-06 | hydrolysis of ATP                            | 9.97E-06 |
| density of filaments                                   | 1.69E-05 | dissociation of microtubules                 | 9.65E-06 | actin capping of filament barbed ends                | 8.32E-06 | concentration of ATP                         | 1.01E-05 |
| phagocytosis by macrophage cancer cell lines           | 1.69E-05 | metabolism of fructose-1,6-diphosphate       | 9.65E-06 | reactive gliosis                                     | 8.32E-06 | failure of bone marrow                       | 1.03E-05 |
| quantity of lamellipodia                               | 1.69E-05 | degradation of amino acids                   | 9.74E-06 | abnormal morphology of cerebellum                    | 8.60E-06 | neurodegeneration of brain                   | 1.03E-05 |
| glioma                                                 | 1.77E-05 | modification of hydrogen peroxide            | 9.86E-06 | myelodysplastic syndrome                             | 8.61E-06 | accumulation of neurofilaments               | 1.06E-05 |
| disassembly of focal adhesions                         | 1.85E-05 | mitochondrial myopathy                       | 9.87E-06 | metastatic occult primary cancer of head and neck    | 8.75E-06 | adult-onset amyotrophic lateral sclerosis    | 1.06E-05 |
| elongation of axons                                    | 1.85E-05 | metabolism of DNA                            | 9.92E-06 | metastatic squamous cell cancer of the ethmoid sinus | 8.75E-06 | binding of actin cytoskeleton                | 1.06E-05 |
| retraction of plasma membrane projections              | 1.88E-05 | binding of lipid                             | 1.02E-05 | metastatic squamous cell cancer of the larynx        | 8.75E-06 | formation of clathrin-coated vesicles        | 1.06E-05 |
| Growth Failure                                         | 1.89E-05 | infection by Flaviviridae                    | 1.09E-05 | metastatic squamous cell cancer of the hypopharynx   | 8.75E-06 | cell death of hippocampal neurons            | 1.12E-05 |
| docking of vesicles                                    | 1.92E-05 | organic aciduria                             | 1.11E-05 | metastatic squamous cell cancer of the lip           | 8.75E-06 | quantity of phosphatidylinositol diphosphate | 1.12E-05 |
| degradation of mitochondria                            | 2.11E-05 | shape of cells                               | 1.26E-05 | recurrent occult primary cancer of head and neck     | 8.75E-06 | nonischemic cardiomyopathy                   | 1.15E-05 |

**Supp. Table 3 (cont.)**

| Eif2b5 <sup>M</sup> , w11                 |          | WT, w11                                 |          | Eif2b5 <sup>M</sup> , w12                                |          | WT, w12                                    |          |
|-------------------------------------------|----------|-----------------------------------------|----------|----------------------------------------------------------|----------|--------------------------------------------|----------|
| synaptic transmission of synapse          | 2.14E-05 | outgrowth of axons                      | 1.30E-05 | recurrent squamous cell cancer of the ethmoid sinus      | 8.75E-06 | shape of cells                             | 1.15E-05 |
| myelination of cells                      | 2.11E-05 | formation of actin bundles              | 1.26E-05 | phosphorylation of nucleotide                            | 8.75E-06 | size of plasma membrane projections        | 1.13E-05 |
| nuclear export of protein                 | 1.92E-05 | cell death of heart cells               | 1.13E-05 | metastatic squamous cell cancer of the maxillary sinus   | 8.75E-06 | autosomal dominant motor neuron disease    | 1.13E-05 |
| adult-onset amyotrophic lateral sclerosis | 1.95E-05 | benign neoplasm of female genital organ | 1.17E-05 | metastatic squamous cell cancer of the oropharynx        | 8.75E-06 | instability of microtubules                | 1.13E-05 |
| formation of clathrin-coated vesicles     | 1.95E-05 | cell death of hippocampal neurons       | 1.23E-05 | metastatic squamous cell cancer of the supraglottis      | 8.75E-06 | long term depression of Purkinje cells     | 1.13E-05 |
| fusion of muscle cells                    | 2.20E-05 | mental retardation                      | 1.31E-05 | recurrent squamous cell cancer of the glottis            | 8.75E-06 | depressive disorder                        | 1.19E-05 |
| actin capping                             | 2.29E-05 | coordination                            | 1.31E-05 | recurrent squamous cell cancer of the hypopharynx        | 8.75E-06 | heart rate                                 | 1.21E-05 |
| autosomal dominant motor neuron disease   | 2.29E-05 | hypertrophy of heart                    | 1.33E-05 | recurrent squamous cell cancer of the lip                | 8.75E-06 | migration of tumor cell lines              | 1.24E-05 |
| size of plasma membrane projections       | 2.29E-05 | activation of enzyme                    | 1.35E-05 | recurrent squamous cell cancer of the maxillary sinus    | 8.75E-06 | degeneration of cerebral cortex            | 1.25E-05 |
| Renal Cancer and Tumors                   | 2.41E-05 | fatty acid oxidation disorder           | 1.36E-05 | recurrent squamous cell cancer of the oropharynx         | 8.75E-06 | binding of cytoskeleton                    | 1.27E-05 |
| polarization of cells                     | 2.49E-05 | abnormal morphology of cells            | 1.37E-05 | recurrent squamous cell cancer of the supraglottis       | 8.75E-06 | disruption of microtubules                 | 1.27E-05 |
| loss of neurites                          | 2.51E-05 | M phase of cervical cancer cell lines   | 1.46E-05 | unresectable occult primary cancer of head and neck      | 8.75E-06 | elongation of filaments                    | 1.27E-05 |
| pinocytosis                               | 2.52E-05 | release of L-glutamic acid              | 1.46E-05 | unresectable squamous cell cancer of the ethmoid sinus   | 8.75E-06 | loss of intercellular junctions            | 1.27E-05 |
| quantity of neurites                      | 2.63E-05 | long term depression of synapse         | 1.52E-05 | unresectable squamous cell cancer of the glottis         | 8.75E-06 | transport of mitochondria                  | 1.27E-05 |
| morphology of synapse                     | 2.68E-05 | depolymerization of filaments           | 1.53E-05 | unresectable squamous cell cancer of the hypopharynx     | 8.75E-06 | infection of kidney cell lines             | 1.28E-05 |
| transport of H <sup>+</sup>               | 2.70E-05 | fusion of muscle cells                  | 1.53E-05 | unresectable squamous cell cancer of the lip             | 8.75E-06 | infection of embryonic cell lines          | 1.29E-05 |
| organization of Golgi apparatus           | 2.74E-05 | function of neurons                     | 1.54E-05 | unresectable squamous cell cancer of the maxillary sinus | 8.75E-06 | infection of epithelial cell lines         | 1.29E-05 |
| elongation of filaments                   | 2.84E-05 | release of amino acids                  | 1.54E-05 | unresectable squamous cell cancer of the oropharynx      | 8.75E-06 | endoplasmic reticulum stress response      | 1.31E-05 |
| loss of intercellular junctions           | 2.84E-05 | morphology of head                      | 1.57E-05 | unresectable squamous cell cancer of the supraglottis    | 8.75E-06 | X-linked mental retardation                | 1.31E-05 |
| lung tumor                                | 2.85E-05 | Ewing's sarcoma                         | 1.62E-05 | viral entry by Influenza virus                           | 8.75E-06 | binding of microtubules                    | 1.42E-05 |
| migration of tumor cell lines             | 2.88E-05 | inborn error of lipid metabolism        | 1.66E-05 | head and neck neoplasia                                  | 8.84E-06 | homo-oligomerization of protein            | 1.46E-05 |
| branching of axons                        | 3.24E-05 | memory                                  | 1.67E-05 | degradation of mitochondria                              | 9.09E-06 | atrophy of muscle                          | 1.53E-05 |
| axonal transport                          | 3.35E-05 | epilepsy                                | 1.70E-05 | long-term potentiation of cerebral cortex cells          | 9.09E-06 | nasopharyngeal cancer                      | 1.53E-05 |
| formation of actin bundles                | 3.35E-05 | leiomyomatosis                          | 1.72E-05 | synthesis of reactive oxygen species                     | 9.25E-06 | small cell lung cancer                     | 1.53E-05 |
| transport of Ca <sup>2+</sup>             | 3.54E-05 | primary cardiomyopathy                  | 1.91E-05 | neurodegeneration of central nervous system              | 9.78E-06 | metastatic squamous cell cancer of the lip | 1.54E-05 |

**Supp. Table 3 (cont.)**

| Eif2b5 <sup>M</sup> , w11                              |          | WT, w11                                |          | Eif2b5 <sup>M</sup> , w12                  |          | WT, w12                                                |          |
|--------------------------------------------------------|----------|----------------------------------------|----------|--------------------------------------------|----------|--------------------------------------------------------|----------|
| renal cancer                                           | 3.61E-05 | metabolism of monosaccharide           | 1.94E-05 | metabolism of GABA                         | 9.81E-06 | metastatic squamous cell cancer of the maxillary sinus | 1.54E-05 |
| shape of cells                                         | 3.35E-05 | formation of cytoplasmic aggregates    | 1.73E-05 | morphology of head                         | 9.35E-06 | formation of actin stress fibers                       | 1.53E-05 |
| processing of RNA                                      | 3.37E-05 | shape change of fibroblast cell lines  | 1.79E-05 | association of vesicles                    | 9.62E-06 | accumulation of filaments                              | 1.54E-05 |
| fusion of myoblasts                                    | 3.40E-05 | hydrolysis of ATP                      | 1.84E-05 | dissociation of microtubules               | 9.62E-06 | metastatic occult primary cancer of head and neck      | 1.54E-05 |
| hydrolysis of ATP                                      | 3.40E-05 | abnormal morphology of metencephalon   | 1.84E-05 | linkage of cytoskeleton                    | 9.62E-06 | metastatic squamous cell cancer of the ethmoid sinus   | 1.54E-05 |
| size of embryo                                         | 3.44E-05 | refolding of protein                   | 1.85E-05 | metabolism of fructose-1,6-diphosphate     | 9.62E-06 | metastatic squamous cell cancer of the glottis         | 1.54E-05 |
| Ewing's sarcoma                                        | 3.53E-05 | morphology of synapse                  | 1.89E-05 | movement of rodents                        | 9.70E-06 | metastatic squamous cell cancer of the hypopharynx     | 1.54E-05 |
| extension of neurites                                  | 3.70E-05 | tetramerization of protein             | 1.96E-05 | modification of hydrogen peroxide          | 9.81E-06 | metastatic squamous cell cancer of the oropharynx      | 1.54E-05 |
| accumulation of filaments                              | 3.74E-05 | fusion of early endosomes              | 1.96E-05 | refractory classical Hodgkin lymphoma      | 9.81E-06 | metastatic squamous cell cancer of the supraglottis    | 1.54E-05 |
| development of cerebral cortex cells                   | 3.74E-05 | priming of vesicles                    | 1.96E-05 | relapsed classical Hodgkin lymphoma        | 9.81E-06 | recurrent occult primary cancer of head and neck       | 1.54E-05 |
| metastatic occult primary cancer of head and neck      | 3.74E-05 | quantity of intermediate filaments     | 1.96E-05 | elongation of cellular protrusions         | 1.01E-05 | recurrent squamous cell cancer of the ethmoid sinus    | 1.54E-05 |
| metastatic squamous cell cancer of the ethmoid sinus   | 3.74E-05 | necrosis of epithelial tissue          | 1.97E-05 | growth of organism                         | 1.09E-05 | recurrent squamous cell cancer of the glottis          | 1.54E-05 |
| metastatic squamous cell cancer of the glottis         | 3.74E-05 | bone sarcoma                           | 2.04E-05 | synaptic transmission of synapse           | 1.10E-05 | recurrent squamous cell cancer of the hypopharynx      | 1.54E-05 |
| metastatic squamous cell cancer of the hypopharynx     | 3.74E-05 | release of vesicles                    | 2.04E-05 | morphology of mitochondria                 | 1.10E-05 | recurrent squamous cell cancer of the lip              | 1.54E-05 |
| metastatic squamous cell cancer of the lip             | 3.74E-05 | metabolism of glutathione              | 2.13E-05 | neuroepithelial tumor                      | 1.11E-05 | recurrent squamous cell cancer of the maxillary sinus  | 1.54E-05 |
| metastatic squamous cell cancer of the maxillary sinus | 3.74E-05 | formation of membrane processes        | 2.20E-05 | binding of microtubules                    | 1.16E-05 | recurrent squamous cell cancer of the oropharynx       | 1.54E-05 |
| metastatic squamous cell cancer of the oropharynx      | 3.74E-05 | synthesis of acyl-coenzyme A           | 2.20E-05 | localization of protein                    | 1.17E-05 | recurrent squamous cell cancer of the supraglottis     | 1.54E-05 |
| metastatic squamous cell cancer of the supraglottis    | 3.74E-05 | abnormal morphology of telencephalon   | 2.25E-05 | glioma                                     | 1.17E-05 | unresectable occult primary cancer of head and neck    | 1.54E-05 |
| phosphorylation of nucleotide                          | 3.74E-05 | dystonia                               | 2.31E-05 | cell viability of neuroblastoma cell lines | 1.20E-05 | unresectable squamous cell cancer of the ethmoid sinus | 1.54E-05 |
| recurrent occult primary cancer of head and neck       | 3.74E-05 | degeneration of cerebral cortex        | 2.34E-05 | organization of Golgi apparatus            | 1.22E-05 | unresectable squamous cell cancer of the glottis       | 1.54E-05 |
| recurrent squamous cell cancer of the ethmoid sinus    | 3.74E-05 | dysfunction of mitochondria            | 2.34E-05 | motor function                             | 1.25E-05 | unresectable squamous cell cancer of the hypopharynx   | 1.54E-05 |
| recurrent squamous cell cancer of the glottis          | 3.74E-05 | synthesis of nitric oxide              | 2.38E-05 | axonal transport                           | 1.25E-05 | unresectable squamous cell cancer of the lip           | 1.54E-05 |
| unresectable squamous cell cancer of the glottis       | 3.74E-05 | abnormal morphology of rhombencephalon | 2.63E-05 | release of L-glutamic acid                 | 1.45E-05 | export of molecule                                     | 1.90E-05 |

**Supp. Table 3 (cont.)**

| Eif2b5 <sup>M</sup> , w11                                |          | WT, w11                                                |          | Eif2b5 <sup>M</sup> , w12                   |          | WT, w12                                                  |          |
|----------------------------------------------------------|----------|--------------------------------------------------------|----------|---------------------------------------------|----------|----------------------------------------------------------|----------|
| unresectable squamous cell cancer of the hypopharynx     | 3.74E-05 | extension of neurites                                  | 2.63E-05 | M phase of cervical cancer cell lines       | 1.45E-05 | motor function                                           | 1.90E-05 |
| recurrent squamous cell cancer of the hypopharynx        | 3.74E-05 | viral entry by virus                                   | 2.39E-05 | concentration of L-glutamic acid            | 1.25E-05 | unresectable squamous cell cancer of the maxillary sinus | 1.54E-05 |
| recurrent squamous cell cancer of the lip                | 3.74E-05 | activation of permeability transition pores            | 2.44E-05 | mental retardation                          | 1.29E-05 | unresectable squamous cell cancer of the oropharynx      | 1.54E-05 |
| recurrent squamous cell cancer of the maxillary sinus    | 3.74E-05 | autosomal recessive Charcot-Marie-Tooth disease type 2 | 2.44E-05 | endoplasmic reticulum stress response       | 1.30E-05 | unresectable squamous cell cancer of the supraglottis    | 1.54E-05 |
| recurrent squamous cell cancer of the oropharynx         | 3.74E-05 | replenishment of vesicles                              | 2.44E-05 | hypertrophy of heart                        | 1.31E-05 | transport of carboxylic acid                             | 1.67E-05 |
| recurrent squamous cell cancer of the supraglottis       | 3.74E-05 | scattering                                             | 2.47E-05 | processing of RNA                           | 1.35E-05 | congenital aplastic anemia                               | 1.84E-05 |
| unresectable occult primary cancer of head and neck      | 3.74E-05 | cell death of cortical neurons                         | 2.56E-05 | fatty acid oxidation disorder               | 1.35E-05 | synaptic transmission of cerebral cortex cells           | 1.84E-05 |
| unresectable squamous cell cancer of the ethmoid sinus   | 3.74E-05 | metabolism of amino acids                              | 2.60E-05 | long-term potentiation of brain cells       | 1.42E-05 | mental retardation                                       | 1.89E-05 |
| unresectable squamous cell cancer of the lip             | 3.74E-05 | aciduria                                               | 2.83E-05 | elongation of cells                         | 1.45E-05 | abnormal morphology of cells                             | 1.92E-05 |
| unresectable squamous cell cancer of the maxillary sinus | 3.74E-05 | fusion of cells                                        | 2.84E-05 | apoptosis of pheochromocytoma cell lines    | 1.51E-05 | blebbing                                                 | 1.94E-05 |
| unresectable squamous cell cancer of the oropharynx      | 3.74E-05 | invasion of carcinoma cell lines                       | 2.93E-05 | release of amino acids                      | 1.52E-05 | low-grade lymphoma                                       | 1.94E-05 |
| unresectable squamous cell cancer of the supraglottis    | 3.74E-05 | reorganization of cytoskeleton                         | 2.95E-05 | apoptosis of fibroblast cell lines          | 1.54E-05 | hypertrophy of heart                                     | 1.96E-05 |
| neurodegeneration of brain                               | 3.78E-05 | quantity of cellular inclusion bodies                  | 2.98E-05 | glioblastoma cancer                         | 1.60E-05 | export of protein                                        | 1.96E-05 |
| progressive encephalopathy                               | 3.78E-05 | transport of L-glutamic acid                           | 2.98E-05 | morphology of tumor cell lines              | 1.63E-05 | inborn error of lipid metabolism                         | 1.96E-05 |
| binding of microtubules                                  | 3.78E-05 | homo-oligomerization of protein                        | 3.12E-05 | inborn error of lipid metabolism            | 1.65E-05 | development of central nervous system                    | 2.00E-05 |
| aciduria                                                 | 3.91E-05 | adult-onset amyotrophic lateral sclerosis              | 3.18E-05 | long-term potentiation of hippocampal cells | 1.71E-05 | development of cerebral cortex                           | 2.01E-05 |
| chronic kidney disease                                   | 4.17E-05 | formation of clathrin-coated vesicles                  | 3.18E-05 | cell movement of kidney cell lines          | 1.81E-05 | cell movement of fibrosarcoma cell lines                 | 2.02E-05 |
| degeneration of cerebral cortex                          | 4.24E-05 | development of muscle                                  | 3.22E-05 | polarity of cells                           | 1.82E-05 | aplastic anemia                                          | 2.07E-05 |
| exchange of GDP                                          | 4.33E-05 | long term depression of brain cells                    | 3.24E-05 | metabolism of L-glutamic acid               | 1.84E-05 | concentration of phosphatidylinositol                    | 2.13E-05 |
| formation of endosomes                                   | 4.33E-05 | abnormal morphology of white matter                    | 3.26E-05 | refolding of protein                        | 1.84E-05 | exchange of GDP                                          | 2.15E-05 |
| spherocytosis                                            | 4.33E-05 | phagocytosis by macrophage cancer cell lines           | 3.26E-05 | cell polarity formation                     | 1.87E-05 | size of intercellular junctions                          | 2.15E-05 |
| synthesis of acetyl-coenzyme A                           | 4.33E-05 | quantity of lamellipodia                               | 3.26E-05 | morphology of synapse                       | 1.87E-05 | synthesis of acetyl-coenzyme A                           | 2.15E-05 |
| cell death of pheochromocytoma cell lines                | 4.40E-05 | startle response                                       | 3.32E-05 | phagocytosis of tumor cell lines            | 1.87E-05 | large-cell lymphoma                                      | 2.15E-05 |
| reorganization of actin cytoskeleton                     | 4.40E-05 | cell death of cardiomyocytes                           | 3.44E-05 | Clathrin mediated endocytosis               | 1.90E-05 | abnormal morphology of hippocampus                       | 2.15E-05 |
| formation of cytoplasmic aggregates                      | 4.42E-05 | cell spreading of fibroblast cell lines                | 3.72E-05 | migration of breast cancer cell lines       | 1.91E-05 | Rac protein signal transduction                          | 2.24E-05 |
| phagocytosis                                             | 4.44E-05 | cell-cell adhesion                                     | 3.76E-05 | fusion of early endosomes                   | 1.96E-05 | autoimmune pancreatitis                                  | 2.24E-05 |
| contextual conditioning                                  | 4.56E-05 | nuclear export                                         | 3.76E-05 | priming of vesicles                         | 1.96E-05 | fatty acid oxidation disorder                            | 2.24E-05 |



Supp. Table 4

| Symbol       | Cluster   | WT, w11 | WT, w12 | Eif2b5 <sup>M</sup> , w11 | Eif2b5 <sup>M</sup> , w12 |
|--------------|-----------|---------|---------|---------------------------|---------------------------|
| Eif1         | cluster 1 | 0.9869  | 0.3002  | 0.9573                    | 0.9525                    |
| Mx1          | cluster 1 | 1.6331  | 1.111   | 0.9046                    |                           |
| Mpp2         | cluster 1 | 1.586   |         | 0.9409                    | 1.1224                    |
| Ngef         | cluster 1 | 1.4572  |         | 0.9422                    | 1.0044                    |
| Cryz         | cluster 1 | 2.0832  |         | 1.0492                    | 1.0534                    |
| Nd1          | cluster 1 | 1.5391  | 0.7     | 0.983                     | 0.9751                    |
| Vps26a       | cluster 1 | 3.48    |         | 1.1656                    | 1.0198                    |
| Dctn6        | cluster 1 | 2.0639  |         | 1.0814                    | 0.9802                    |
| Arpp19       | cluster 1 | 0.9895  | 1.7989  |                           | 0.9189                    |
| Twf2         | cluster 1 | 1.1482  | 1.8332  | 1.0394                    | 1.0277                    |
| Tardbp       | cluster 1 | 1.5822  | 2.2572  | 1.1906                    | 1.1351                    |
| Kars         | cluster 1 | 0.9678  | 1.3     | 0.8487                    | 0.7789                    |
| Ppp1r9b      | cluster 1 | 0.9836  | 1.4415  | 0.8869                    | 0.9117                    |
| Serbp1       | cluster 1 | 0.8996  | 2.8593  | 1.2805                    | 0.9726                    |
| Hip1r        | cluster 1 | 1.199   | 1.9369  | 1.2064                    | 1.0507                    |
| Basp1        | cluster 1 | 1.1091  | 1.8254  | 1.0568                    | 1.0098                    |
| Rpl15        | cluster 1 | 0.9967  | 1.5822  | 1.0242                    | 0.9844                    |
| Fam162a      | cluster 1 | 0.9043  | 1.5061  | 0.8678                    | 0.9027                    |
| Timm44       | cluster 2 | 1.4388  |         | 0.7327                    | 1.1062                    |
| Sh3bgrl2     | cluster 2 | 1.7025  | 1.2804  | 0.7788                    | 1.0385                    |
| Serpina1     | cluster 2 | 1.7074  | 0.5829  | 0.7725                    |                           |
| Fam195b      | cluster 2 | 1.1366  | 0.2624  | 0.6111                    | 0.8766                    |
| Ranbp1       | cluster 2 | 0.9133  | 4.3206  | 0.5545                    | 1.034                     |
| Copa         | cluster 2 | 1.2143  | 1.1425  | 0.6988                    | 0.9571                    |
| Dbnl         | cluster 2 | 1.0981  | 1.3268  | 0.5793                    | 1.0631                    |
| Lars         | cluster 2 | 1.0746  | 1.277   | 0.276                     | 0.7969                    |
| Rab39b       | cluster 2 | 2.275   | 1.2697  |                           | 2.1503                    |
| Hebp1        | cluster 2 | 4.2693  |         | 1.2656                    | 4.1985                    |
| Dlst         | cluster 2 |         | 0.07944 | 0.08862                   | 0.9444                    |
| Slc32a1      | cluster 2 | 0.7802  | 0.7519  | 1.035                     | 1.3085                    |
| Syncrip (Sy) | cluster 2 | 1.3571  | 1.0181  | 1.1353                    | 1.8607                    |
| Krt76        | cluster 2 | 8.8684  |         | 14.0087                   | 26.1712                   |
| Ncs1         | cluster 2 | 0.9614  | 0.8842  | 0.9348                    | 1.4403                    |
| Ptp4a1       | cluster 2 | 1.5361  | 1.1596  |                           | 2.1906                    |
| Map7d1       | cluster 3 | 0.7443  |         | 4.0583                    | 0.8853                    |
| Appl1        | cluster 3 | 1.09    |         | 1.8417                    | 0.8933                    |
| Lasp1        | cluster 3 | 1.1542  | 0.2097  | 1.8354                    | 1.029                     |
| Rph3a        | cluster 3 | 1.1079  | 0.2646  | 3.0742                    | 0.9065                    |
| Myh14        | cluster 3 | 0.8277  | 0.9385  | 1.5713                    |                           |
| Vat1l        | cluster 3 | 0.4977  | 0.7553  | 1.2486                    | 0.8535                    |
| Hepacam      | cluster 3 | 0.8391  | 1.0298  | 1.5732                    | 1.3336                    |
| Kiaa1244     | cluster 3 | 1.2158  | 1.524   | 2.0074                    | 0.9531                    |
| Madd         | cluster 3 | 1.3051  | 1.5026  | 2.1596                    | 1.0569                    |
| Unc13a       | cluster 3 | 1.4059  | 1.4753  | 2.0381                    | 1.1164                    |
| Tceal3       | cluster 3 | 1.0793  | 1.196   | 2.4192                    | 0.9979                    |
| Mthfd1l      | cluster 3 | 1.1206  | 1.1744  | 1.8739                    | 1.0294                    |
| Sec22b       | cluster 3 | 1.2025  | 1.2023  | 1.8382                    | 1.1711                    |
| Rab24        | cluster 3 | 1.0799  | 1.0956  | 1.6738                    | 0.9312                    |
| Kif1a        | cluster 3 | 0.9746  | 1.1094  | 1.7927                    | 1.1089                    |

**Supp. Table 4 (cont.)**

| <b>Symbol</b> | <b>Cluster</b> | <b>WT, w11</b> | <b>WT, w12</b> | <b>Eif2b5<sup>M</sup>, w11</b> | <b>Eif2b5<sup>M</sup>, w12</b> |
|---------------|----------------|----------------|----------------|--------------------------------|--------------------------------|
| Rtn4          | cluster 3      | 1.088          | 1.0861         | 1.7196                         | 1.1579                         |
| Aldh2         | cluster 3      | 0.9503         | 0.8995         | 1.5596                         | 0.973                          |
| Mink1         | cluster 3      | 1.4154         | 1.4903         | 2.0813                         | 1.6012                         |
| Gpr158        | cluster 3      | 1.3873         | 1.4854         | 2.2507                         | 1.6882                         |
| Map7d2        | cluster 3      | 0.6445         | 0.8577         | 1.5097                         | 0.7407                         |
| Gnb2L1        | cluster 3      | 1.0427         | 1.1792         | 1.6423                         | 1.084                          |
| Mobp          | cluster 3      | 0.7639         |                | 1.3002                         | 0.7729                         |
| Rpl23a        | cluster 3      | 0.9493         | 1.2536         | 1.4723                         | 0.9661                         |
| Ap1b1         | cluster 3      | 0.9785         | 1.3159         | 1.5434                         | 1.0062                         |
| Add2          | cluster 3      | 1.0382         | 1.5214         | 1.8016                         | 1.0451                         |
| Slc9a3r1      | cluster 3      | 1.1246         | 1.7276         | 2.0271                         | 1.1483                         |
| Nefh          | cluster 3      | 0.6173         | 1.0875         | 1.3842                         | 0.6921                         |
| Marcks        | cluster 3      | 0.9011         | 1.3544         | 1.698                          | 0.9864                         |
| Akap12        | cluster 3      | 0.8389         | 2.4796         | 3.6256                         | 1.1242                         |
| Hint3         | cluster 3      | 0.7685         | 1.0992         | 1.3015                         | 0.8728                         |
| Mapre1        | cluster 3      | 1.0043         | 1.5125         | 1.5809                         | 1.0669                         |
| Hspa4         | cluster 3      | 0.9122         | 1.7793         | 1.9262                         | 1.0321                         |
| Sparcl1       | cluster 3      | 0.8885         | 1.371          | 1.5089                         | 0.9743                         |
| Eif4g1        | cluster 3      | 1.0577         | 1.5343         | 1.7026                         | 1.1003                         |
| Ubqln2        | cluster 3      | 0.9689         | 1.4164         | 1.5541                         | 1.0233                         |
| Hnrnpu        | cluster 3      | 0.9661         | 1.7736         | 1.9666                         | 1.0434                         |
| Dlat          | cluster 3      | 0.9108         | 1.7793         | 2.1662                         | 1.0363                         |
| Fxyd6         | cluster 3      | 1.022          | 1.6182         | 1.6399                         | 1.2246                         |
| Ddx6          | cluster 3      | 1.1432         | 2.0525         | 1.8325                         |                                |
| Ociad1        | cluster 3      | 0.9128         |                | 2.4933                         | 1.2387                         |
| Kiaa1217      | cluster 3      | 1.0023         |                | 1.728                          | 1.1871                         |
| Htt           | cluster 3      | 0.9693         | 1.7591         | 1.5057                         | 1.101                          |
| Gap43         | cluster 3      | 0.8803         | 1.6775         | 1.431                          | 1.0088                         |
| Trim2         | cluster 3      | 1.0323         | 1.8782         | 1.6637                         | 1.1838                         |
| Fau           | cluster 3      | 0.9767         | 1.8237         | 1.6806                         | 1.0926                         |
| Rplp1         | cluster 3      | 0.9629         |                | 3.4208                         | 1.0121                         |
| Map1b         | cluster 3      | 0.9687         | 4.0174         | 2.9148                         | 1.0084                         |
| Rtn1          | cluster 3      | 0.9993         | 2.1534         | 1.9969                         | 0.9468                         |
| Tceal5        | cluster 3      | 1.0594         | 2.2366         | 2.0265                         | 1.0636                         |
| Bsn           | cluster 3      | 1.2793         | 2.1781         | 2.0326                         | 1.3044                         |
| Mrps36        | cluster 3      | 0.9705         | 1.8966         | 1.733                          | 0.9941                         |
| Itsn1         | cluster 3      | 0.9295         | 1.833          | 1.6839                         | 0.9839                         |
| Pdcd6lp       | cluster 3      | 0.849          | 2.5632         | 2.1889                         | 0.9313                         |
| H1F0          | cluster 3      | 1.4272         |                | 18.5333                        | 1.3875                         |
| Syn1          | cluster 3      | 1.1524         | 1.4539         | 3.0546                         | 1.046                          |
| Nt5C          | cluster 3      | 1.0383         |                | 3.8124                         | 0.9788                         |
| Lmnb1         | cluster 3      | 1.0946         | 1.5392         | 1.8202                         | 1.0798                         |
| Actr3b        | cluster 3      | 1.1442         | 1.4156         | 1.7403                         | 1.1101                         |
| Srcin1        | cluster 3      | 1.1438         | 1.3535         | 1.6773                         | 1.1792                         |
| Caskin1       | cluster 3      | 1.1179         | 2.0156         | 3.3604                         | 1.1229                         |
| MacroD2       | cluster 3      | 1.0255         |                | 1.9736                         | 0.8887                         |
| Camkv         | cluster 3      | 1.1529         | 1.9035         | 1.8706                         | 1.0369                         |
| Map4          | cluster 3      | 1.088          |                | 1.6595                         | 1.027                          |
| Hp1Bp3        | cluster 3      | 1.196          |                | 2.8006                         | 1.0787                         |

**Supp. Table 4 (cont.)**

| <b>Symbol</b> | <b>Cluster</b> | <b>WT, w11</b> | <b>WT, w12</b> | <b>Eif2b5<sup>M</sup>, w11</b> | <b>Eif2b5<sup>M</sup>, w12</b> |
|---------------|----------------|----------------|----------------|--------------------------------|--------------------------------|
| Picb1         | cluster 3      | 1.0562         | 1.4599         | 1.5963                         | 1.0203                         |
| Ncan          | cluster 3      | 1.1438         | 1.9413         | 2.0945                         | 1.0655                         |
| Dnaja2        | cluster 3      | 1.0103         | 1.4257         | 1.521                          | 1.0063                         |
| Gprin1        | cluster 3      | 1.2259         | 3.5204         | 4.0445                         | 1.1057                         |
| Bin1          | cluster 3      | 1.0444         | 3.4427         | 4.1375                         | 1.0442                         |
| Ckap5         | cluster 3      | 0.9948         | 1.6228         | 1.7182                         | 0.9978                         |
| Map1a         | cluster 3      | 0.9903         | 1.9551         | 2.0901                         | 0.9599                         |
| Cap1          | cluster 3      | 1.1353         | 3.1236         | 3.3868                         | 1.0199                         |
| Aak1          | cluster 3      | 1.1758         | 3.4613         | 3.649                          | 1.1367                         |
| Ncl           | cluster 3      | 1.0416         | 5.4843         | 5.9165                         | 1.0429                         |
| Hnrpl         | cluster 3      | 1.0142         | 1.6207         | 1.6294                         | 1.0945                         |
| Ap3d1         | cluster 3      | 1.0448         | 1.5573         | 1.5672                         | 1.0913                         |
| Rplp2         | cluster 3      | 1.0036         | 1.8336         | 1.8418                         | 1.0688                         |
| Amph          | cluster 3      | 1.0247         | 2.1034         | 2.1219                         | 1.0793                         |
| Syn2          | cluster 3      | 1.1113         | 1.7667         | 1.7456                         | 1.1062                         |
| Wasf1         | cluster 3      | 1.2478         | 1.6894         | 1.7506                         | 1.0926                         |
| Dync1li2      | cluster 3      | 1.0424         | 1.4452         | 1.3415                         | 0.8618                         |
| Palm          | cluster 3      | 1.1728         |                | 1.9548                         | 0.8929                         |
| Acot9         | cluster 3      | 1.4059         |                | 2.475                          | 1.0359                         |
| Mapt          | cluster 3      | 0.9877         | 1.9968         | 1.5855                         | 0.7849                         |
| Cttn          | cluster 3      | 1.1775         | 1.6698         | 1.47                           | 1.0652                         |
| Dbn1          | cluster 3      | 1.2286         | 1.7195         | 1.5192                         | 1.0976                         |
| Fam120a       | cluster 3      | 1.235          | 1.8588         | 1.5722                         | 0.9968                         |
| Fubp1         | cluster 3      | 1.119          |                | 2.1344                         | 0.8838                         |
| Sept8         | cluster 3      | 1.0146         | 1.527          | 1.1547                         | 0.98                           |
| Map6          | cluster 3      | 1.0164         | 2.2648         | 1.3816                         | 0.9981                         |
| Pdap1         | cluster 3      | 1.0153         | 1.7723         | 1.4247                         | 1.0848                         |
| Trim3         | cluster 3      | 0.9555         | 1.8696         | 1.3452                         | 1.0484                         |
| Tln2          | cluster 3      | 1.1061         | 1.7719         | 1.3991                         | 1.1657                         |
| Vps13c        | cluster 3      | 1.2936         | 1.6546         | 1.3957                         | 0.9045                         |
| Kiaa1967      | Other          | 0.9758         | 1.9478         |                                | 1.4239                         |
| Eif4g3        | Other          | 1.0172         | 2.546          |                                | 1.1081                         |
| Klc1          | Other          | 0.8657         | 1.9566         |                                | 0.986                          |
| Brp44l        | Other          | 0.9483         | 1.9232         |                                | 1.0718                         |
| Sgsm1         | Other          | 0.9557         | 1.6033         |                                | 1.0645                         |
| Ppp1r2        | Other          | 0.9099         | 1.4497         |                                | 0.877                          |
| Fam136a       | Other          | 0.9228         | 2.0469         |                                | 0.8614                         |
| Mllt4         | Other          | 1.2207         | 1.9241         |                                | 1.1819                         |
| Cdc42bpb      | Other          | 1.3086         | 1.9957         |                                | 1.0976                         |
| Nras          | Other          | 1.3941         | 2.0484         |                                | 1.3878                         |
| Npm1          | Other          | 1.0426         | 3.1137         |                                | 1.0513                         |

**Supp. Table 5**

|                                         | <b>Funcional category</b>           | <b>P-value</b> | <b>Number of genes</b> | <b>Gene symbols</b>                                                                                                                                                                                                             |
|-----------------------------------------|-------------------------------------|----------------|------------------------|---------------------------------------------------------------------------------------------------------------------------------------------------------------------------------------------------------------------------------|
| Nervous System Development and Function | axonal transport                    | 1.E-07         | 6                      | Dync1li2, Htt, Kif1a, Klc1, Mapt, Nefh                                                                                                                                                                                          |
|                                         | recycling of synaptic vesicles      | 4.E-07         | 5                      | Amph, Dbnl, Gap43, Itsn1, Syn1                                                                                                                                                                                                  |
|                                         | synaptogenesis                      | 6.E-07         | 10                     | Bsn, Htt, Kif1a, Ncan, Palm, Rtn4, Sparcl1, Syn1, Syn2, Unc13a                                                                                                                                                                  |
|                                         | posttetanic potentiation            | 4.E-06         | 4                      | Add2, Htt, Syn1, Syn2                                                                                                                                                                                                           |
|                                         | seizures                            | 6.E-06         | 14                     | Amph, Bsn, Dbnl, Gap43, Htt, Map1b, Mapt, Plcb1, Ppp1r9b, Ptp4a1, Slc32a1, Syn1, Syn2, Trim3                                                                                                                                    |
|                                         | outgrowth of axons                  | 9.E-06         | 7                      | Gap43, Map1b, Mapt, Nefh, Ngef, Rtn4, Syn1                                                                                                                                                                                      |
|                                         | length of dendritic spines          | 6.E-06         | 4                      | Dbn1, Htt, Itsn1, Mapt                                                                                                                                                                                                          |
| Cellular assembly and organization      | assembly of cell-cell contacts      | 1.E-07         | 12                     | Bsn, Gnb2l1, Htt, Kif1a, Ncan, Palm, Rtn4, Sparcl1, Syn1, Syn2, Tln2, Unc13a                                                                                                                                                    |
|                                         | assembly of intercellular junctions | 9.E-07         | 11                     | Bsn, Htt, Kif1a, Ncan, Palm, Rtn4, Sparcl1, Syn1, Syn2, Tln2, Unc13a                                                                                                                                                            |
|                                         | microtubule dynamics                | 2.E-10         | 32                     | Akap12, Basp1, Bsn, Cap1, Cdc42bpb, Ckap5, Ctnn, Dbn1, Dync1li2, Eif4g3, Gap43, Gprin1, Htt, Itsn1, Klc1, Lasp1, Map1a, Map1b, Map4, Map6, Mapre1, Mapt, Marcks, Nefh, Palm, Ppp1r9b, Ranbp1, Rtn4, Slc9a3r1, Syn1, Twf2, Wasf1 |
|                                         | stabilization of filaments          | 7.E-08         | 9                      | Ctnn, Gap43, Htt, Map1a, Map1b, Map4, Map6, Mapre1, Mapt                                                                                                                                                                        |
|                                         | quantity of filaments               | 4.E-06         | 8                      | Gnb2l1, Htt, Map1b, Map4, Mapt, Marcks, Nefh, Nras                                                                                                                                                                              |
| mRNA translation                        | Translation machinery               | 1.E-05         | 8                      | Eif1, Eif4g1, Eif4g3, Fau, Rpl15,Rpl23a,Rplp1,Rplp2                                                                                                                                                                             |
